# Supplementary material
Source: Research Square preprint supplement (doi:10.21203/rs.3.rs-9096969/v1)
Supplement: Supplementary file 1 [file 1b15fd06c4f2c62e222011ca.docx]

Table S1: comparison of mean Log₁₀-transformed CMh bacterial loads by detailed coinfection type

| **coinf_type - CMh** | **Count** | **Mean** | **Median** | **Q1** | **Q3** | **SD** |
| --- | --- | --- | --- | --- | --- | --- |
| 16S-CMh-Mass | 14 | 2.015540 | 1.872029 | 1.541028 | 2.605559 | 0.6837106 |
| Mex-CMh- | 2 | 2.282829 | 2.282829 | 2.081822 | 2.483837 | 0.5685363 |
| 16S-Mex-CMh-Mass | 69 | 2.439801 | 2.322219 | 1.876795 | 3.056905 | 0.8543038 |
| 16S-Mex-CMh- | 211 | 2.463509 | 2.348305 | 1.886922 | 2.890408 | 0.8887461 |
| 16S-CMh- | 62 | 2.529141 | 2.463883 | 1.780112 | 3.175217 | 0.9738487 |
| Mex-CMh-Mass | 1 | 2.858537 | 2.858537 | 2.858537 | 2.858537 | NA |
| Total | 359 | NA | NA | NA | NA | NA |

Table S2: statistical significance of variations of mean Log₁₀-transformed CMh bacterial loads by detailed coinfection type

| **Group1** | **Group2** | **Test_Used** | **p_value** |
| --- | --- | --- | --- |
| 16S-Mex-CMh- | 16S-Mex-CMh-Mass | Wilcoxon | 0.90796551 |
| 16S-Mex-CMh- | 16S-CMh- | Wilcoxon | 0.57493182 |
| 16S-Mex-CMh- | 16S-CMh-Mass | Wilcoxon | 0.05863844 |
| 16S-Mex-CMh-Mass | 16S-CMh- | t-test | 0.57962738 |
| 16S-Mex-CMh-Mass | 16S-CMh-Mass | t-test | 0.05528894 |
| 16S-CMh- | 16S-CMh-Mass | t-test | 0.41754255 |

Table S3: comparison of mean Log₁₀-transformed Mass bacterial loads by detailed coinfection type

| **coinf_type - Mass** | **Count** | **Mean** | **Median** | **Q1** | **Q3** | **SD** |
| --- | --- | --- | --- | --- | --- | --- |
| Mex-CMh-Mass | 2 | 1.616769 | 1.616769 | 0.8583847 | 2.375154 | 2.1450359 |
| 16S-Mex-Mass | 10 | 2.271599 | 2.186778 | 1.8806701 | 2.298129 | 0.8457944 |
| 16S-Mass | 9 | 2.641187 | 2.423246 | 2.3053514 | 3.117271 | 0.6450083 |
| 16S-CMh-Mass | 19 | 2.292487 | 2.578639 | 1.4320448 | 3.265330 | 1.3533163 |
| 16S-Mex-CMh-Mass | 71 | 2.529317 | 2.644439 | 1.7400495 | 3.304920 | 1.1940958 |
| Total | 111 | NA | NA | NA | NA | NA |

Table S4: statistical significance of variations of mean Log₁₀-transformed Mass bacterial loads by detailed coinfection type

| **Group1** | **Group2** | **Test_Used** | **p_value** |
| --- | --- | --- | --- |
| 16S-Mex-Mass | 16S-Mex-CMh-Mass | Wilcoxon | 0.2419406 |
| 16S-Mex-Mass | 16S-CMh-Mass | Wilcoxon | 0.7654916 |
| 16S-Mex-Mass | 16S-Mass | Wilcoxon | 0.1023198 |
| 16S-Mex-CMh-Mass | 16S-CMh-Mass | t-test | 0.4938788 |
| 16S-Mex-CMh-Mass | 16S-Mass | t-test | 0.6697324 |
| 16S-CMh-Mass | 16S-Mass | t-test | 0.3643299 |

Table S5: comparison of mean Log₁₀-transformed Mex bacterial loads by detailed coinfection type

| **coinf_type - Mex** | **Count** | **Mean** | **Median** | **Q1** | **Q3** | **SD** |
| --- | --- | --- | --- | --- | --- | --- |
| Mex-CMh-Mass | 2 | 2.287016 | 2.287016 | 1.842478 | 2.731553 | 1.2573428 |
| Mex-CMh | 3 | 2.486933 | 2.680336 | 2.318012 | 2.752556 | 0.4657061 |
| 16S-Mex | 61 | 2.610693 | 2.552668 | 1.947924 | 2.990783 | 1.0425878 |
| 16S-Mex-Mass | 10 | 2.625288 | 2.747411 | 2.583904 | 2.898036 | 0.6815161 |
| 16S-Mex-CMh- | 245 | 3.249159 | 2.914343 | 2.250420 | 3.668386 | 2.3168137 |
| 16S-Mex-CMh-Mass | 85 | 3.461342 | 3.096910 | 2.311754 | 4.136721 | 1.7033254 |
| Mex | 1 | 3.633468 | 3.633468 | 3.633468 | 3.633468 | NA |
| Total | 407 | NA | NA | NA | NA | NA |

Table S6: statistical significance of variations of mean Log₁₀-transformed Mex bacterial loads by detailed coinfection type

| **Group1** | **Group2** | **Test_Used** | **p_value** |
| --- | --- | --- | --- |
| 16S-Mex-Mass | 16S-Mex-CMh- | Wilcoxon | 0.336997288 |
| 16S-Mex-Mass | 16S-Mex-CMh-Mass | Wilcoxon | 0.192357001 |
| 16S-Mex-Mass | 16S-Mex- | Wilcoxon | 0.437222168 |
| 16S-Mex-Mass | Mex-CMh- | t-test | 0.704817839 |
| 16S-Mex-CMh- | 16S-Mex-CMh-Mass | Wilcoxon | 0.272308091 |
| 16S-Mex-CMh- | 16S-Mex- | Wilcoxon | **0.005754777** |
| 16S-Mex-CMh- | Mex-CMh- | Wilcoxon | 0.368750043 |
| 16S-Mex-CMh-Mass | 16S-Mex- | Wilcoxon | **0.002132401** |
| 16S-Mex-CMh-Mass | Mex-CMh- | Wilcoxon | 0.231802400 |
| 16S-Mex- | Mex-CMh- | Wilcoxon | 0.873818409 |

Table S7: 16S PCR positivity risk factors

| Variable | Category | OR | 95% CI | p-value |
| --- | --- | --- | --- | --- |
| Intercept | | 0.36 | 0.15 - 0.84 | 0.0183 |
| CMh PCR result | CMh PCR neg (ref.) | 1 | — | — |
| CMh PCR pos | 15.49 | 7.35 - 32.68 | **p <0.001** |
| Mex PCR result | Mex PCR neg (ref.) | 1 | — | — |
| Mex PCR pos | 11.76 | 5.59 - 24.72 | **p <0.001** |
| Mass PCR result | Mass PCR neg (ref.) | 1 | — | — |
| Mass PCR pos | 7.14 | 1.6 - 31.85 | **0.0099** |
| Age (years) | 0-2 years (ref.) | 1 | — | — |
| 3 years | 2.92 | 0.84 - 10.15 | 0.092 |
| 4-5 years | 3.8 | 1.47 - 9.8 | **0.0058** |
| > 5 years | 2.41 | 1.1 - 5.4 | **0.033** |
| Production system | Beef (ref.) | 1 | — | — |
| Dairy | 1.72 | 0.86 - 3.46 | 0.13 |

*OR: odds ratio; CI: confidence interval; ref.: reference category. Odds ratios were obtained from a multivariable logistic regression model: glm(formula = 16S PCR pos ~ production + age + CMh PCR result + Mex PCR result + Mass PCR result, family = binomial(link = "logit"), data = data_haemoplasma)*

Table S8: CMh PCR positivity risk factors

| Variable | Category | OR | 95% CI | p-value |
| --- | --- | --- | --- | --- |
| (Intercept) | | 7.35e+05 | 1528.45 - 3.53e+08 | 1.81e-05 |
| Mex PCR result | Mex PCR neg (ref.) | 1 | — | — |
| Mex PCR pos | 3.03 | 2.16-4.25 | **1.59e-10** |
| Mass PCR result | Mass PCR neg (ref.) | 1 | — | — |
| Mass PCR pos | 2.02 | 1.24 - 3.3 | **0.005** |
| Age (years) | 0-2 years (ref.) | 1 | — | — |
| 3 years | 0.6 | 0.39 - 1.19 | 0.17 |
| 4-5 years | 0.48 | 0.29 - 0.81 | **0.0054** |
| > 5 years | 0.19 | 0.16 - 0.32 | **1.21e-10** |
| Production system | Beef (ref.) | 1 | — | — |
| Dairy | 1.75 | 0.99 - 3.1 | 0.056 |
| Mean annual daily relative humidity | | 0.87 | 0.81 - 0.95 | **8.13e-04** |
| Mean annual daily temperature | | 0.75 | 0.6 - 0.92 | **0.0065** |
| Climate type | Mediterranean (ref.) | 1 | — | — |
| Semi-oceanic | 5.04 | 1.74 - 14.57 | **0.0026** |

*OR: odds ratio; CI: confidence interval; ref.: reference category. Odds ratios were obtained from a multivariable logistic regression model: glm(formula = CMh PCR pos ~ production + age + Mex PCR pos + Mass PCR pos + climate + mean annual daily temperature + annual mean relative humidity, family = binomial(link = "logit"), data = data_CMh)*

Table S9: Mex PCR positivity risk factors

| Variable | Category | OR | 95% CI | p-value |
| --- | --- | --- | --- | --- |
| (Intercept) | | 2.77 | 0.95 - 8.05 | 0.061 |
| CMh PCR result | CMh PCR neg (ref.) | 1 | — | — |
| CMh PCR pos | 3.16 | 2.27 - 4.41 | **9.35e-12** |
| Age (years) | 0-2 years (ref.) | 1 | — | — |
| 3 years | 1.58 | 0.93 - 2.65 | 0.088 |
| 4-5 years | 0.66 | 0.43 - 1.02 | 0.062 |
| > 5 years | 0.48 | 0.31 - 0.74 | **0.00092** |
| Mean annual daily wind speed | | 0.93 | 0.86 - 1 | 0.072 |

*OR: odds ratio; CI: confidence interval; ref.: reference category. Odds ratios were obtained from a multivariable logistic regression model: glm(formula = Mex PCR pos ~ age + CMh PCR pos + annual mean wind speed, family = binomial(link = "logit"), data = data_CMh)*

Table S10: Mass qPCR positivity risk factors

| Variable | Category | OR | 95% CI | p-value |
| --- | --- | --- | --- | --- |
| (Intercept) | | 0.002 | 0.0001 - 0.05 | **0.00013** |
| CMh PCR result | CMh PCR neg (ref.) | 1 | — | — |
| CMh PCR pos | 1.97 | 1.24 - 3.14 | **0.0043** |
| Mex PCR result | Mex PCR neg (ref.) | 1 | — | — |
| Mex PCR pos | 1.44 | 0.95 - 2.18 | 0.085 |
| Mean annual daily precipitations | | 1.62 | 1.29 - 2.03 | **3.13e-05** |
| Mean annual daily temperature | | 1.52 | 1.08 - 2.14 | **0.016** |
| Mean annual daily wind speed | | 0.75 | 0.61 - 0.93 | **0.0069** |

*OR: odds ratio; CI: confidence interval; ref.: reference category. Odds ratios were obtained from a multivariable logistic regression model:glm(formula = mass_int_num ~ cmh_int + mex_int + tmean_year + precip_year + wind_year, family = binomial(link = "logit"), data = data_Mass)*

Table S11: five dairy herds integrally sampled characteristics

| Herd | 1 | 2 | 3 | 4 | 5 |
| --- | --- | --- | --- | --- | --- |
| Type | Dairy | Dairy | Organic dairy | Dairy | Dairy |
| Breed | HF | HF | HF | HF | Montbéliarde |
| History | None | Clinical cases | None | None | None |
| Date of sampling | 03.04.2021 | 11.01.2025 | 04.01.2025 | 19.09.2023 | 19.09.2023 |
| Department | Haute-Garonne | Cantal | Cantal | Ardèche | Ardèche |
| Number of bovines | 151 | 134 | 82 | 67 | 54 |
| Milking type | AMS | AMS | Milking machine | AMS | Milking machine |
| Milk yield/cow/305 DIM | 12047 L | 14553 L | 7540 L | 8906 L | 8300 L |
| Grazing system | No grazing | March to November:  heifers of 10-24 months old | March to November:  dairy cows and heifers > 6 months old | March to December:  dry cows and heifers > 6 months old | March to July:  dairy cows  March to November:  Heifers > 6 months old |
| T (°C) | 14.41 °C | 10.86 °C | 10.56 °C | 7.81 °C | 12.39 °C |
| RH (%) | 70.88% | 80.51% | 81.26% | 72.6% | 66.01% |
| P (mm) | 3.64 mm | 5.24 mm | 6.59 mm | 5.88 mm | 3.26 mm |
| WS (m/s) | 14.67 m/s | 10.67 m/s | 10.42 m/s | 7.65 m/s | 12.03 m/s |
| Climate type | Mediterranean | Semi-oceanic | Semi-oceanic | Mediterranean | Mediterranean |
| 16S prevalence | 87.4% | 94% | 97.6% | 79.1% | 79.2% |
| CMh prevalence | 76.2% | 88.8% | 86.6% | 44.8% | 61.1% |
| Mex prevalence | 72.2% | 77.6% | 67.1% | 70.1% | 48.1% |
| Mass prevalence | 16.6% | 23.9% | 39% | 14.9% | 27.8% |

*Herd 2 and Herd 3 are 8km apart; Herd 4 and Herd 5 are 22 km apart; AMS: Automatic Milking System; DIM: days in milk; coinfection patterns are represented on figure 2. Clinical cases were compatible with hemoplasma infection; T: annual mean daily temperature (°C); RH: annual mean daily relative humidity (%); WS: annual mean daily wind speed (m/s); P: annual mean daily precipitation (mm); dry cow: depending on season, pasture time/year last 2 to 3 months maximum*


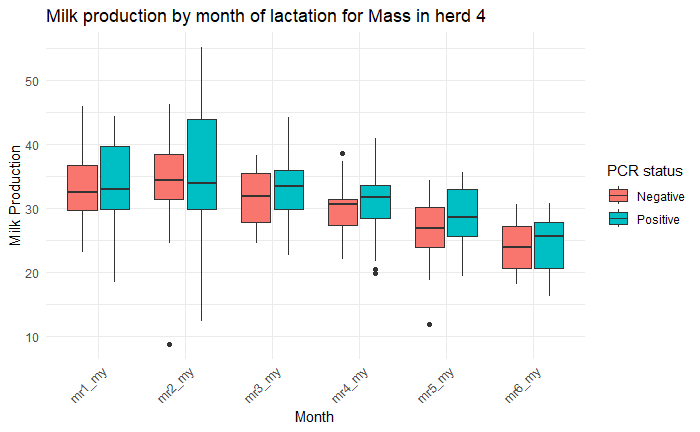

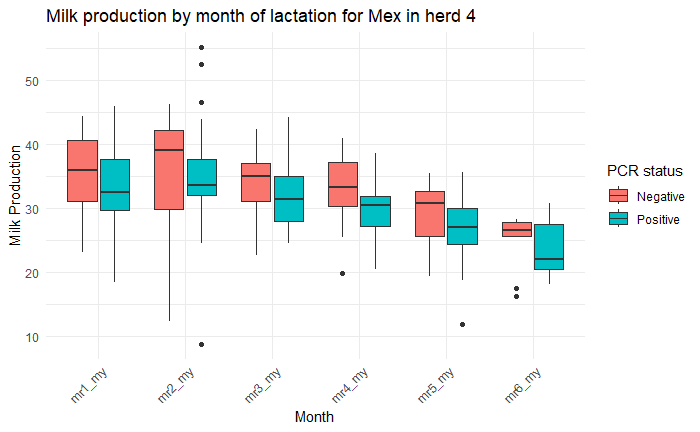

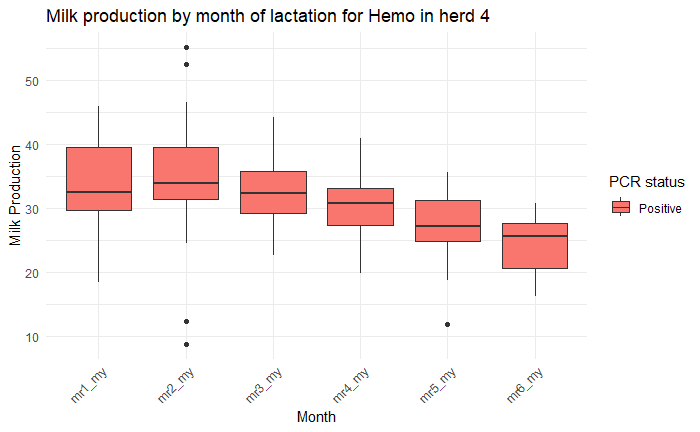

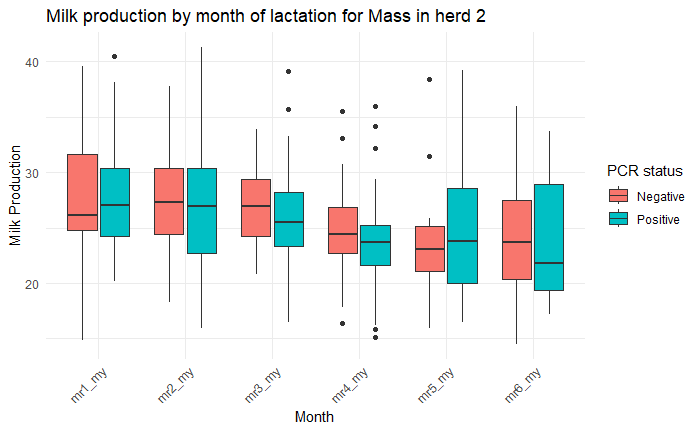

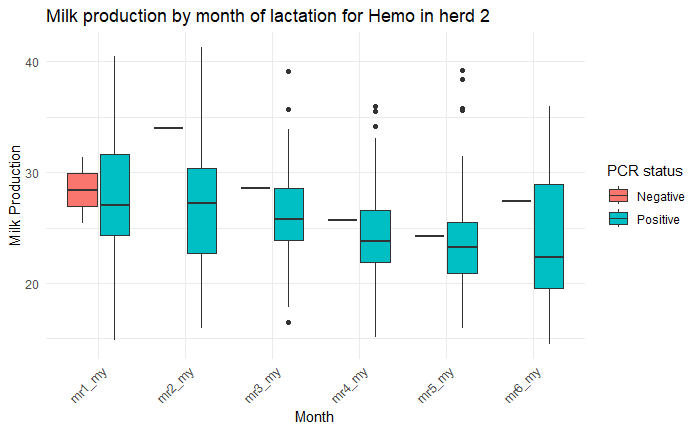

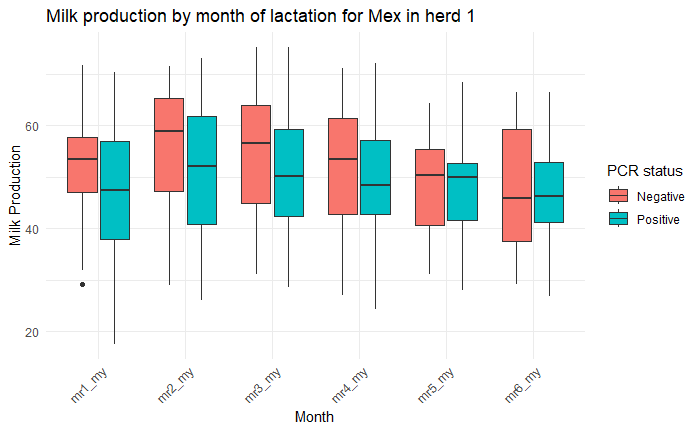

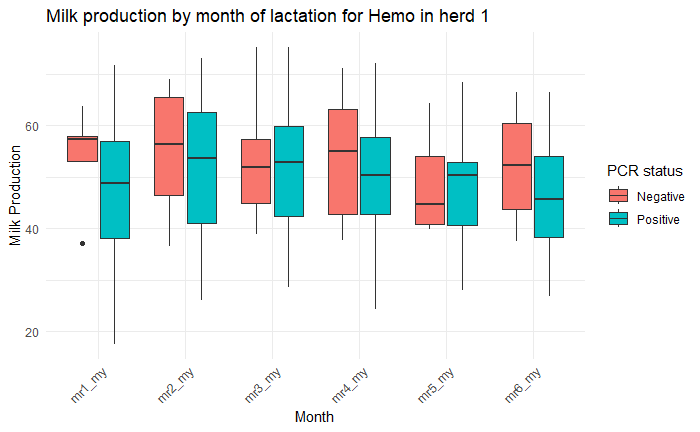

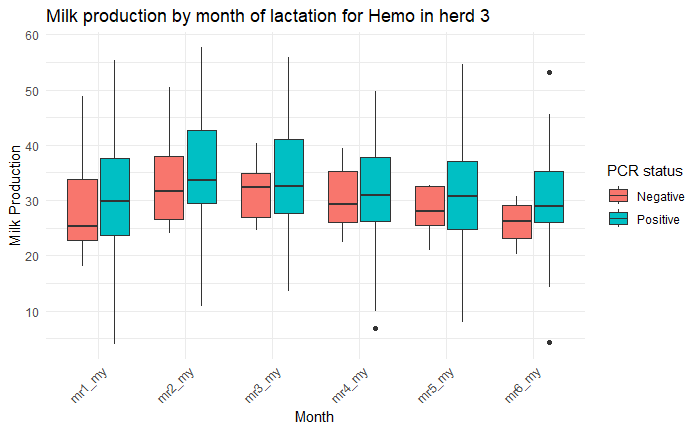

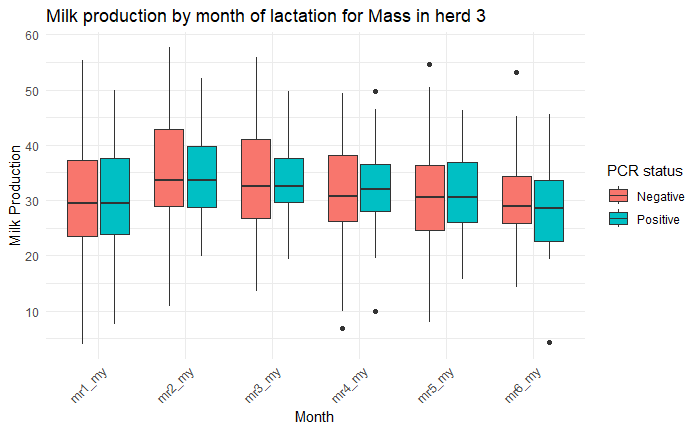

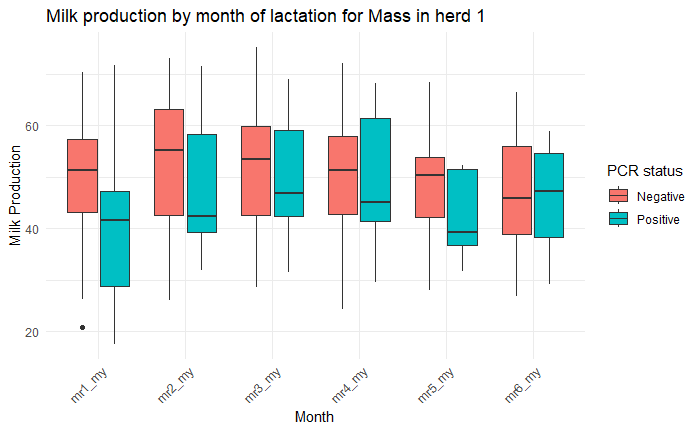

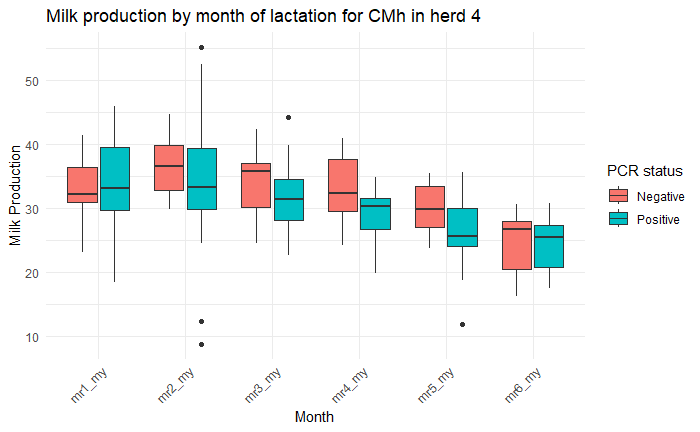

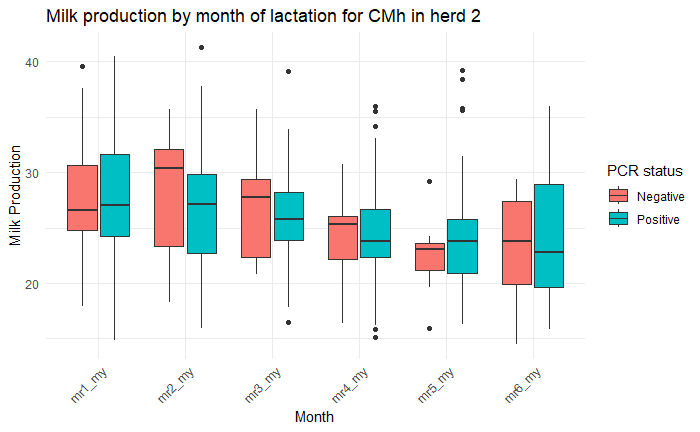

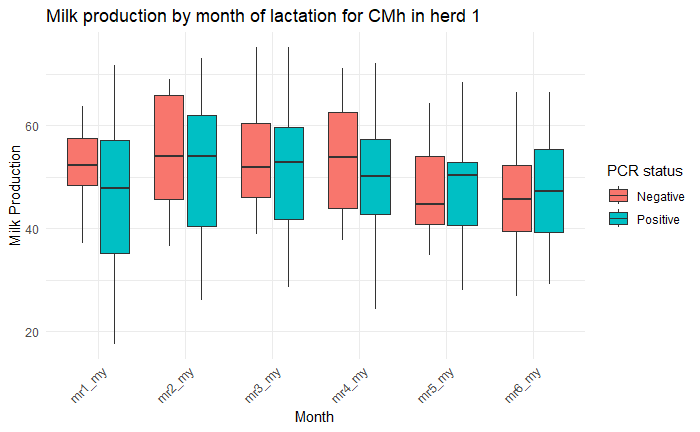

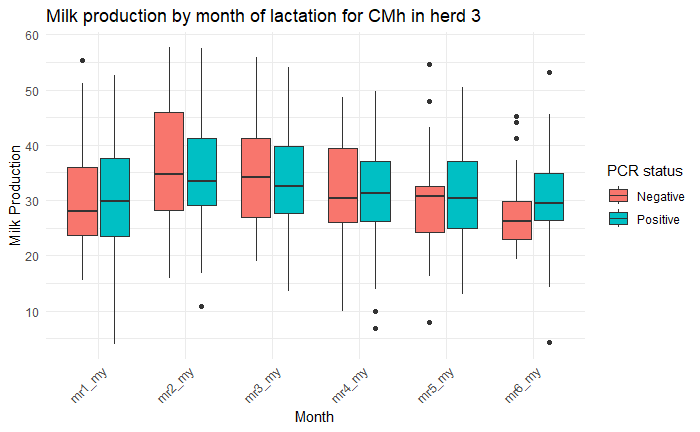

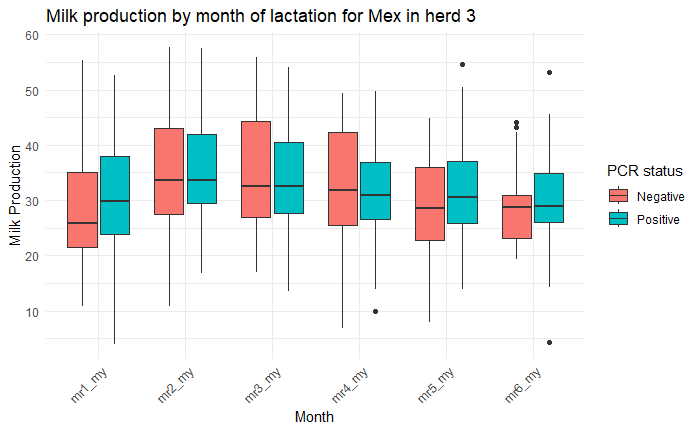

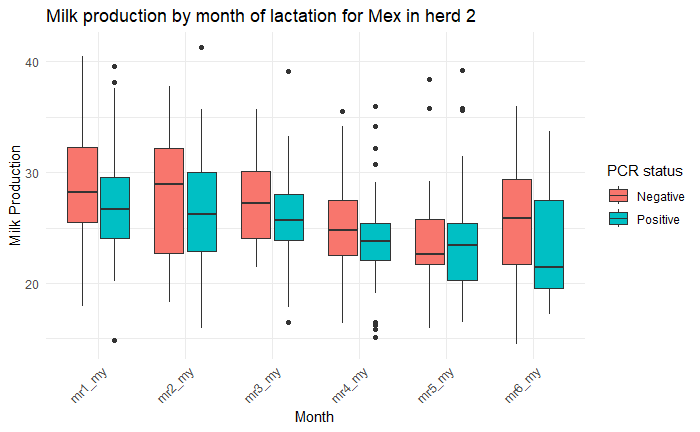
Figure S1: milk yield per cow and per month according according to each PCR status

**Herd 4**

**Herd 3**

**Herd 2**

**Herd 1**

*Herd 5 was not included due to unavailable data during lactation. Milk production is expressed in liter of milk per day. mx: month of lactation number x; my:milk yield. There was no significant difference except for Herd 1 – Hemo – month 6 (t-test, p=0.013).*

Table S12: age categories among each herd

| Age category | Herd 1 | Herd 2 | Herd 3 | Herd 4 | Herd 5 |
| --- | --- | --- | --- | --- | --- |
| Of less than 2 years | 46 | 22 | 15 | 18 | 16 |
| Of 2 years | 48 | 31 | 14 | 10 | 7 |
| Of 3 years | 30 | 23 | 8 | 12 | 4 |
| Of 4-5 years | 19 | 35 | 25 | 15 | 14 |
| Of more than 5 years | 8 | 22 | 20 | 12 | 13 |
| Total | 151 | 134 | 82 | 67 | 54 |

Figure S2: infections by hemoplasma species and strains according to herds and age categories


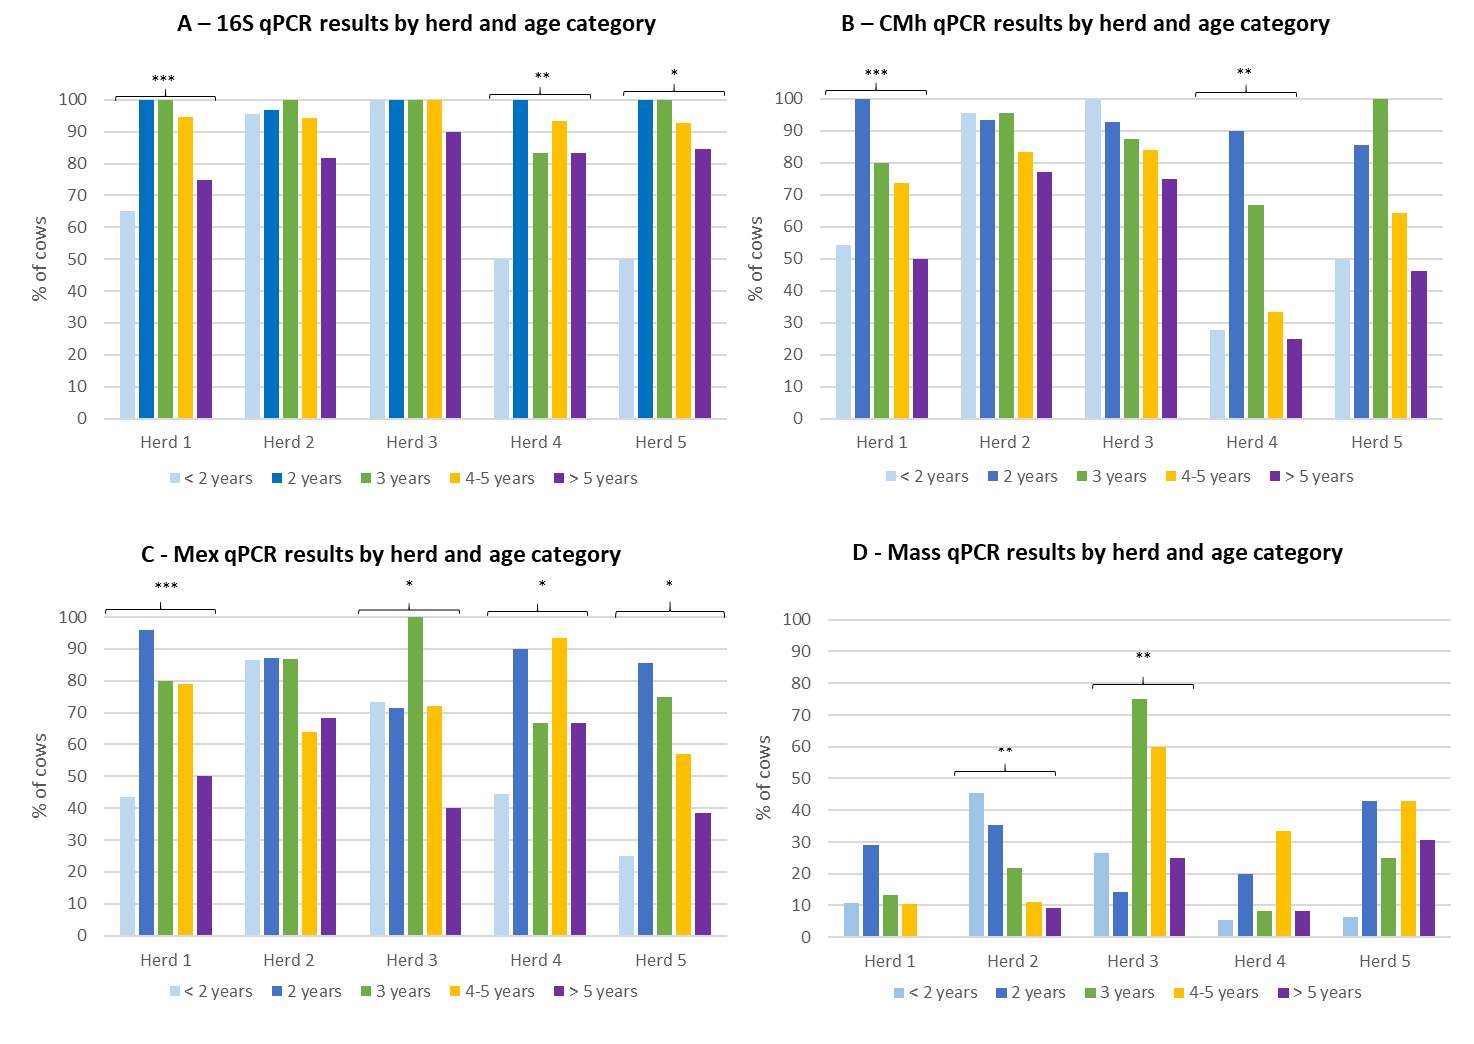


*Herd 1: n=151 animals; Herd 2: n=134 animals, Herd 3: n=82 animals; Herd 4: n=67 animals; Herd 5: n=54 animals; statistical significance: *** p<0.001, ** p<0.01, *p<0.05, Fisher exact test; effectives are presented in Table S12*
