# Supplementary material
Source: Research Square preprint supplement (doi:10.21203/rs.3.rs-9096969/v1)
Supplement: Supplementary file 2 [file 551b7fd4c9449adc871d8693.xlsx]

## Sheet: Sheet1
id-herd_ano	Herd_ano	date_sampling	year_samp	season_sampling	month_samp	prod	age_samp_year	cat_age_samp_year	age_samp_month	cat_age_samp_month	sex	birth	breed	status	dep	buf_int	hemo_int	mex_int	cmh_int	mass_int	coinf_type	coinf_status	nb_pcr	buf_Ct	hemo_Ct	mex_Ct	cmh_Ct	mass_Ct	buf_quant	hemo_quant	mex_quant	cmh_quant	mass_quant	buf_log10_quant	hemo_log10_quant	mex_log10_quant	cmh_log10_quant	mass_log10_quant	buf_treat	buf_ext_date	buf_samp_ext_delay	cat_12S_samp_ext_delay	buf_ext_pcr_delay	cat_12S_ext_pcr_delay	buf_ext_samp_pcr_delay	cat_12S_ext_samp_pcr_delay	buf_kit_ext	buf_ext	buf_dil
3003-20	20	2024-02-01	2024	Winter	2	B	4	4 -5 years	53	>24months	F	16/09/2019	Limousine	Subclinical	42	pos	pos	pos	pos	neg	16S-Mex-CMh-	DI	5	16.54	27.6	31.24	27.09	0	NE	1800	729	538	0	NE	3.25527	2.86273	2.73078	neg	Ext, Robot IDVET	09/04/2024	68	50-100 d	36	0-50 d	104	100-200 d	MAG FAST768: 034	80 µl	neat
3004-20	20	2024-02-01	2024	Winter	2	B	4	4 -5 years	53	>24months	F	16/09/2019	Limousine	Subclinical	42	pos	pos	pos	pos	pos	16S-Mex-CMh-Mass	TI	5	15.14	27.53	32.03	28.3	32.19	NE	1800	481	210	103	NE	3.25527	2.68215	2.32222	2.01284	Ext, Robot IDVET	09/04/2024	68	50-100 d	36	0-50 d	104	100-200 d	MAG FAST768: 034	80 µl	neat
3031-20	20	2024-02-01	2024	Winter	2	B	4	4 -5 years	53	>24months	F	10/10/2019	Limousine	Subclinical	42	pos	pos	pos	pos	neg	16S-Mex-CMh-	DI	5	18.33	30.26	35.87	30	36.84	NE	500	non-quantifiable	56.1	0	NE	2.69897	non-quantifiable	1.74896	neg	Ext, Robot IDVET	09/04/2024	68	50-100 d	36	0-50 d	104	100-200 d	MAG FAST768: 034	80 µl	neat
3579-20	20	2024-02-01	2024	Winter	2	B	9	> 5 years	114	>24months	F	21/09/2014	Limousine	Subclinical	42	pos	pos	pos	neg	neg	16S-Mex-	MI	5	17.27	32.52	32.85	0	0	NE	170	313	0	0	NE	2.23045	2.49554	neg	neg	Ext, Robot IDVET	09/04/2024	68	50-100 d	36	0-50 d	104	100-200 d	MAG FAST768: 034	80 µl	neat
3581-20	20	2024-02-01	2024	Winter	2	B	9	> 5 years	114	>24months	F	23/09/2014	Limousine	Subclinical	42	pos	pos	pos	neg	neg	16S-Mex-	MI	5	16.99	31.17	32.64	0	0	NE	330	349	0	0	NE	2.51851	2.54283	neg	neg	Ext, Robot IDVET	09/04/2024	68	50-100 d	36	0-50 d	104	100-200 d	MAG FAST768: 034	80 µl	neat
6506-20	20	2024-02-01	2024	Winter	2	B	12	> 5 years	150	>24months	F	19/10/2011	Limousine	Subclinical	42	pos	pos	pos	pos	neg	16S-Mex-CMh-	DI	5	18.51	35	35.97	34.05	0	NE	54	non-quantifiable	non-quantifiable	0	NE	1.73239	non-quantifiable	non-quantifiable	neg	Ext, Robot IDVET	09/04/2024	68	50-100 d	36	0-50 d	104	100-200 d	MAG FAST768: 034	80 µl	neat
6848-20	20	2024-02-01	2024	Winter	2	B	6	> 5 years	77	>24months	F	10/10/2017	Limousine	Subclinical	42	pos	pos	pos	pos	pos	16S-Mex-CMh-Mass	TI	5	17.25	24.72	27.91	35.19	28.77	NE	6800	4200	non-quantifiable	938	NE	3.83251	3.62325	non-quantifiable	2.9722	Ext, Robot IDVET	09/04/2024	68	50-100 d	36	0-50 d	104	100-200 d	MAG FAST768: 034	80 µl	neat
6935-20	20	2024-02-01	2024	Winter	2	B	5	4 -5 years	65	>24months	F	01/10/2018	Limousine	Subclinical	42	pos	pos	neg	pos	pos	16S-CMh-Mass	DI	5	17.53	28.14	0	29.45	31.74	NE	1400	0	86	138	NE	3.14613	neg	1.9345	2.13988	Ext, Robot IDVET	09/04/2024	68	50-100 d	36	0-50 d	104	100-200 d	MAG FAST768: 034	80 µl	neat
7066-20	20	2024-02-01	2024	Winter	2	B	11	> 5 years	135	>24months	F	21/12/2012	Limousine	Subclinical	42	pos	pos	neg	pos	neg	16S-CMh-	MI	5	18.55	35.84	0	34.24	0	NE	non-quantifiable	0	non-quantifiable	0	NE	non-quantifiable	neg	non-quantifiable	neg	Ext. Robot IDVET	09/04/2024	68	50-100 d	36	0-50 d	104	100-200 d	MAG FAST768: 034	80 µl	neat
7415-20	20	2024-02-01	2024	Winter	2	B	2	2 years	29	>24months	F	09/09/2021	Limousine	Subclinical	42	pos	pos	pos	pos	neg	16S-Mex-CMh-	DI	5	16.17	27.07	32.96	26.49	0	NE	2200	295	857	0	NE	3.34242	2.46982	2.93298	neg	Ext, Robot IDVET	09/04/2024	68	50-100 d	36	0-50 d	104	100-200 d	MAG FAST768: 034	80 µl	neat
7431-20	20	2024-02-01	2024	Winter	2	B	2	2 years	29	>24months	F	19/09/2021	Limousine	Subclinical	42	pos	pos	pos	pos	neg	16S-Mex-CMh-	DI	5	17.46	22.39	23.65	30.35	0	NE	20000	39400	42.7	0	NE	4.30103	4.5955	1.63043	neg	Ext, Robot IDVET	09/04/2024	68	50-100 d	36	0-50 d	104	100-200 d	MAG FAST768: 034	80 µl	neat
7863-20	20	2024-02-01	2024	Winter	2	B	8	> 5 years	102	>24months	F	19/09/2015	Limousine	Subclinical	42	pos	pos	neg	neg	neg	16S-	unknown	5	17.63	36.58	0	36.88	0	NE	non-quantifiable	0	0	0	NE	non-quantifiable	neg	neg	neg	Ext. Robot IDVET	09/04/2024	68	50-100 d	36	0-50 d	104	100-200 d	MAG FAST768: 034	80 µl	neat
7869-20	20	2024-02-01	2024	Winter	2	B	4	4 -5 years	53	>24months	F	24/09/2019	Limousine	Subclinical	42	pos	pos	pos	neg	neg	16S-Mex-	MI	5	17.44	29.68	31.75	0	35.82	NE	660	558	0	0	NE	2.81954	2.74663	neg	neg	Ext, Robot IDVET	09/04/2024	68	50-100 d	36	0-50 d	104	100-200 d	MAG FAST768: 034	80 µl	neat
9404-20	20	2024-02-01	2024	Winter	2	B	3	3 years	41	>24months	F	17/09/2020	Limousine	Subclinical	42	pos	pos	pos	pos	neg	16S-Mex-CMh-	DI	5	17.34	29.37	35	29.48	35.17	NE	770	non-quantifiable	84	0	NE	2.88649	non-quantifiable	1.92428	neg	Ext, Robot IDVET	09/04/2024	68	50-100 d	36	0-50 d	104	100-200 d	MAG FAST768: 034	80 µl	neat
9412-20	20	2024-02-01	2024	Winter	2	B	3	3 years	41	>24months	F	27/09/2020	Limousine	Subclinical	42	pos	pos	pos	pos	neg	16S-Mex-CMh-	DI	5	17.1	30.05	32.92	30.57	35.14	NE	550	301	36	0	NE	2.74036	2.47857	1.5563	neg	Ext, Robot IDVET	09/04/2024	68	50-100 d	36	0-50 d	104	100-200 d	MAG FAST768: 034	80 µl	neat
6038-42	42	2024-04-17	2024	Spring	4	D	4	4 -5 years	46	>24months	F	12/07/2020	HF	clinical	12	pos	pos	neg	neg	neg	16S-	unknown	5	22.05	0	0	0	0	NE	NE	0	0	0	NE	NE	neg	neg	neg	Ext. Robot IDVET	03/05/2024	16	0-50 d	3	0-50 d	19	0-100 d	MAG FAST768: 034	80 µl	neat
131-25	25	2024-02-05	2024	Winter	2	B	2	2 years	27	>24months	F	15/11/2021	Limousine	Subclinical	42	pos	pos	pos	pos	neg	16S-Mex-CMh-	DI	5	17.13	28.35	27.94	30.45	0	NE	5600	4130	39.5	0	NE	3.74819	3.61595	1.5966	neg	Ext, Robot IDVET	09/04/2024	64	50-100 d	38	0-50 d	102	100-200 d	MAG FAST768: 034	80 µl	neat
1837-25	25	2024-02-05	2024	Winter	2	B	5	4 -5 years	65	>24months	F	15/10/2018	Aubrac	Subclinical	42	pos	pos	pos	pos	neg	16S-Mex-CMh-	DI	5	16.89	29.63	32.52	28.87	0	NE	2800	372	135	0	NE	3.44716	2.57054	2.13033	neg	Ext, Robot IDVET	09/04/2024	64	50-100 d	38	0-50 d	102	100-200 d	MAG FAST768: 034	80 µl	neat
4734-25	25	2024-02-05	2024	Winter	2	B	10	> 5 years	121	>24months	F	09/03/2014	Limousine	Subclinical	42	pos	pos	pos	pos	neg	16S-Mex-CMh-	DI	5	16.32	31.06	35.55	29.76	0	NE	1300	non-quantifiable	67.6	0	NE	3.11394	non-quantifiable	1.82995	neg	Ext, Robot IDVET	09/04/2024	64	50-100 d	42	0-50 d	106	100-200 d	MAG FAST768: 034	80 µl	neat
5225-25	25	2024-02-05	2024	Winter	2	B	8	> 5 years	94	>24months	F	22/05/2016	Limousine	Subclinical	42	pos	pos	pos	neg	neg	16S-Mex-	MI	5	17.11	31.49	33.68	0	36.26	NE	1000	non-quantifiable	0	7.49	NE	3	non-quantifiable	neg	0.874482	Ext, Robot IDVET	09/04/2024	64	50-100 d	38	0-50 d	102	100-200 d	MAG FAST768: 034	80 µl	neat
9284-25	25	2024-02-05	2024	Winter	2	B	6	> 5 years	70	>24months	F	10/05/2018	Limousine	Subclinical	42	pos	pos	pos	pos	neg	16S-Mex-CMh-	DI	5	17.04	33.07	33.06	33.63	0	NE	450	non-quantifiable	non-quantifiable	0	NE	2.65321	non-quantifiable	non-quantifiable	neg	Ext, Robot IDVET	09/04/2024	64	50-100 d	38	0-50 d	102	100-200 d	MAG FAST768: 034	80 µl	neat
9408-25	25	2024-02-05	2024	Winter	2	B	3	3 years	33	>24months	M	31/05/2021	Limousine	Subclinical	42	pos	pos	pos	pos	neg	16S-Mex-CMh-	DI	5	16.18	29.9	29.95	31.02	0	NE	2500	1440	25.4	0	NE	3.39794	3.15836	1.40483	neg	Ext, Robot IDVET	09/04/2024	64	50-100 d	38	0-50 d	102	100-200 d	MAG FAST768: 034	80 µl	neat
9553-25	25	2024-02-05	2024	Winter	2	B	3	3 years	42	>24months	F	11/08/2020	Limousine	Subclinical	42	pos	pos	pos	pos	neg	16S-Mex-CMh-	DI	5	16.43	29.39	30.21	28.39	0	NE	3200	1250	196	0	NE	3.50515	3.09691	2.29226	neg	Ext, Robot IDVET	09/04/2024	64	50-100 d	38	0-50 d	102	100-200 d	MAG FAST768: 034	80 µl	neat
9555-25	25	2024-02-05	2024	Winter	2	B	3	3 years	42	>24months	F	06/09/2020	Limousine	Subclinical	42	pos	pos	pos	pos	pos	16S-Mex-CMh-Mass	TI	5	16.58	29.49	33.2	27.85	32.86	NE	3000	non-quantifiable	298	67.1	NE	3.47712	non-quantifiable	2.47422	1.82672	Ext, Robot IDVET	09/04/2024	64	50-100 d	38	0-50 d	102	100-200 d	MAG FAST768: 034	80 µl	neat
9556-25	25	2024-02-05	2024	Winter	2	B	3	3 years	42	>24months	F	08/09/2020	Limousine	Subclinical	42	pos	pos	pos	neg	neg	16S-Mex-	MI	5	16.16	28.02	29.32	0	0	NE	6700	2000	0	0	NE	3.82607	3.30103	neg	neg	Ext, Robot IDVET	09/04/2024	64	50-100 d	38	0-50 d	102	100-200 d	MAG FAST768: 034	80 µl	neat
9558-25	25	2024-02-05	2024	Winter	2	B	3	3 years	41	>24months	F	10/09/2020	Limousine	Subclinical	42	pos	pos	pos	pos	neg	16S-Mex-CMh-	DI	5	16	26.16	28.12	30.81	0	NE	18000	3760	29.9	0	NE	4.25527	3.57519	1.47567	neg	Ext, Robot IDVET	09/04/2024	64	50-100 d	38	0-50 d	102	100-200 d	MAG FAST768: 034	80 µl	neat
1342-15	15	2024-12-23	2024	Winter	12	B	7	> 5 years	86	>24months	F	15/12/2017	Aubrac	Subclinical	15	pos	neg	neg	neg	neg	NI	NI	5	19.2	38.54	0	0	0	NE	0	0	0	0	NE	neg	neg	neg	neg	Ext. Robot IDVET	25/03/2025	92	50-100 d	6	0-50 d	98	0-100 d	MAG FAST768: 034	80 µl	neat
1581-15	15	2024-12-23	2024	Winter	12	B	10	> 5 years	120	>24months	F	27/02/2015	Aubrac	Subclinical	15	pos	pos	pos	neg	neg	16S-Mex-	MI	5	19.57	30.67	0	0	0	NE	1760	NE	0	0	NE	3.24551	NE	neg	neg	Ext, Robot IDVET	25/03/2025	92	50-100 d	6	0-50 d	98	0-100 d	MAG FAST768: 034	80 µl	neat
2545-15	15	2024-12-23	2024	Winter	12	B	4	4 -5 years	46	>24months	F	18/03/2021	Aubrac	Subclinical	15	pos	pos	pos	pos	pos	16S-Mex-CMh-Mass	TI	5	19.35	30.44	33.03	27.55	27.55	NE	1960	non-quantifiable	294	294	NE	3.29226	non-quantifiable	2.46835	2.46835	Ext, Robot IDVET	25/03/2025	92	50-100 d	6	0-50 d	98	0-100 d	MAG FAST768: 034	80 µl	neat
2598-15	15	2024-12-23	2024	Winter	12	B	7	> 5 years	84	>24months	F	13/02/2018	Aubrac	Subclinical	15	pos	pos	pos	neg	neg	16S-Mex-	MI	5	20.59	33.74	33.34	0	0	NE	411	non-quantifiable	0	0	NE	2.61384	non-quantifiable	neg	neg	Ext, Robot IDVET	25/03/2025	92	50-100 d	6	0-50 d	98	0-100 d	MAG FAST768: 034	80 µl	neat
2718-15	15	2024-12-23	2024	Winter	12	B	9	> 5 years	110	>24months	F	06/12/2015	Aubrac	Subclinical	15	pos	pos	neg	pos	pos	16S-CMh-Mass	DI	5	20.56	35.26	0	32.61	32.61	NE	non-quantifiable	0	non-quantifiable	0.712	NE	non-quantifiable	neg	non-quantifiable	0.1	Ext. Robot IDVET	25/03/2025	92	50-100 d	6	0-50 d	98	0-100 d	MAG FAST768: 034	80 µl	neat
2752-15	15	2024-12-23	2024	Winter	12	B	9	> 5 years	107	>24months	F	01/03/2016	Aubrac	Subclinical	15	pos	neg	neg	neg	neg	NI	NI	5	19.37	38.6	0	0	35.84	NE	0	0	0	0	NE	neg	neg	neg	neg	Ext. Robot IDVET	25/03/2025	92	50-100 d	6	0-50 d	98	0-100 d	MAG FAST768: 034	80 µl	neat
28-15	15	2024-12-23	2024	Winter	12	B	8	> 5 years	97	>24months	F	26/12/2016	Aubrac	Subclinical	15	pos	pos	neg	pos	pos	16S-CMh-Mass	DI	5	20.37	33.61	0	32.06	33.5	NE	178	0	non-quantifiable	non-quantifiable	NE	2.25042	neg	non-quantifiable	non-quantifiable	Ext, Robot IDVET	25/03/2025	92	50-100 d	6	0-50 d	98	0-100 d	MAG FAST768: 034	80 µl	neat
3007-15	15	2024-12-23	2024	Winter	12	B	8	> 5 years	96	>24months	F	11/02/2017	Aubrac	Subclinical	15	pos	pos	neg	pos	pos	16S-CMh-Mass	DI	5	19.31	36.26	0	34.36	34.36	NE	non-quantifiable	0	non-quantifiable	non-quantifiable	NE	non-quantifiable	neg	non-quantifiable	non-quantifiable	Ext. Robot IDVET	25/03/2025	92	50-100 d	6	0-50 d	98	0-100 d	MAG FAST768: 034	80 µl	neat
3038-15	15	2024-12-23	2024	Winter	12	B	7	> 5 years	87	>24months	F	29/10/2017	crossbred	Subclinical	15	pos	pos	pos	neg	neg	16S-Mex-	MI	5	20.01	29.92	33.03	37.59	37.59	NE	2510	non-quantifiable	0	0	NE	3.39967	non-quantifiable	neg	neg	Ext, Robot IDVET	25/03/2025	92	50-100 d	6	0-50 d	98	0-100 d	MAG FAST768: 034	80 µl	neat
4059-15	15	2024-12-23	2024	Winter	12	B	4	4 -5 years	50	>24months	F	22/11/2020	Aubrac	Subclinical	15	pos	pos	pos	pos	pos	16S-Mex-CMh-Mass	TI	5	19.22	32.86	33.04	32.22	32.22	NE	623	non-quantifiable	non-quantifiable	1.13	NE	2.79449	non-quantifiable	non-quantifiable	0.1	Ext, Robot IDVET	25/03/2025	92	50-100 d	6	0-50 d	98	0-100 d	MAG FAST768: 034	80 µl	neat
4088-15	15	2024-12-23	2024	Winter	12	B	4	4 -5 years	47	>24months	F	07/02/2021	Aubrac	Subclinical	15	pos	pos	pos	pos	pos	16S-Mex-CMh-Mass	TI	5	19.51	28.86	29.04	32.76	32.76	NE	4150	5390	non-quantifiable	0.596	NE	3.61805	3.73159	non-quantifiable	0.1	Ext, Robot IDVET	25/03/2025	92	50-100 d	6	0-50 d	98	0-100 d	MAG FAST768: 034	80 µl	neat
6823-15	15	2024-12-23	2024	Winter	12	B	7	> 5 years	86	>24months	F	05/12/2017	crossbred	Subclinical	15	pos	neg	neg	neg	neg	NI	NI	5	19.33	0	0	0	0	NE	0	0	0	0	NE	neg	neg	neg	neg	Ext. Robot IDVET	25/03/2025	92	50-100 d	6	0-50 d	98	0-100 d	MAG FAST768: 034	80 µl	neat
7376-15	15	2024-12-23	2024	Winter	12	B	7	> 5 years	87	>24months	M	22/10/2017	BBB	Subclinical	15	pos	neg	pos	pos	pos	Mex-CMh-Mass	unknown	5	19.15	0	32.53	32.46	32.46	NE	0	25	non-quantifiable	0.852	NE	neg	1.3979400086720377	non-quantifiable	0.1	Ext. Robot IDVET	25/03/2025	92	50-100 d	6	0-50 d	98	0-100 d	MAG FAST768: 034	80 µl	neat
7682-15	15	2024-12-23	2024	Winter	12	B	6	> 5 years	76	>24months	F	21/09/2018	crossbred	Subclinical	15	pos	pos	pos	neg	neg	16S-Mex-	MI	5	18.62	34.29	31.83	36.87	36.87	NE	316	73.4	0	0	NE	2.49969	1.8657	neg	neg	Ext, Robot IDVET	25/03/2025	92	50-100 d	6	0-50 d	98	0-100 d	MAG FAST768: 034	80 µl	neat
8060-15	15	2024-12-23	2024	Winter	12	B	6	> 5 years	72	>24months	F	23/01/2019	Aubrac	Subclinical	15	pos	pos	neg	pos	pos	16S-CMh-Mass	DI	5	19.97	32.65	0	30.67	30.67	NE	688	0	7.17	7.17	NE	2.83759	neg	0.855519	0.855519	Ext, Robot IDVET	25/03/2025	92	50-100 d	6	0-50 d	98	0-100 d	MAG FAST768: 034	80 µl	neat
9430-15	15	2024-12-23	2024	Winter	12	B	8	> 5 years	96	>24months	F	31/01/2017	Aubrac	Subclinical	15	pos	pos	pos	pos	pos	16S-Mex-CMh-Mass	TI	5	22.94	33.28	31.94	32.01	32.01	NE	511	62	non-quantifiable	1.46	NE	2.70842	1.79239	non-quantifiable	0.164353	Ext, Robot IDVET	25/03/2025	92	50-100 d	6	0-50 d	98	0-100 d	MAG FAST768: 034	80 µl	neat
9448-15	15	2024-12-23	2024	Winter	12	B	8	> 5 years	96	>24months	F	31/01/2017	Aubrac	Subclinical	15	pos	pos	pos	neg	neg	16S-Mex-	MI	5	20.45	31.26	30.63	0	0	NE	1330	466	0	0	NE	3.12385	2.66839	neg	neg	Ext, Robot IDVET	25/03/2025	92	50-100 d	6	0-50 d	98	0-100 d	MAG FAST768: 034	80 µl	neat
4924-16	16	2024-02-08	2024	Winter	2	B	7	> 5 years	84	>24months	F	23/03/2017	Charolaise	Subclinical	42	pos	pos	neg	pos	neg	16S-CMh-	MI	5	23.5	37.7	0	35.18	0	NE	non-quantifiable	0	non-quantifiable	0	NE	non-quantifiable	neg	non-quantifiable	neg	Ext. Robot IDVET	03/05/2024	85	50-100 d	28	0-50 d	113	100-200 d	MAG FAST768: 034	80 µl	neat
1567-16	16	2024-02-08	2024	Winter	2	B	7	> 5 years	82	>24months	F	25/05/2017	Charolaise	Subclinical	42	pos	pos	pos	pos	neg	16S-Mex-CMh-	DI	5	21.87	31.24	31.67	29.85	0	NE	16000	122	64	0	NE	4.20412	2.08636	1.80618	neg	Ext, Robot IDVET	07/05/2024	89	50-100 d	27	0-50 d	116	100-200 d	MAG FAST768: 034	80 µl	neat
2437-16	16	2024-02-08	2024	Winter	2	B	4	4 -5 years	47	>24months	F	09/04/2020	Charolaise	Subclinical	42	pos	pos	pos	neg	neg	16S-Mex-	MI	5	22.01	34.1	32.61	0	0	NE	5200	58.7	0	0	NE	3.716	1.76864	neg	neg	Ext, Robot IDVET	07/05/2024	89	50-100 d	27	0-50 d	116	100-200 d	MAG FAST768: 034	80 µl	neat
2465-16	16	2024-02-08	2024	Winter	2	B	4	4 -5 years	43	>24months	F	21/07/2020	Charolaise	Subclinical	42	pos	pos	neg	pos	neg	16S-CMh-	MI	5	22.71	29.87	0	27.05	35.44	NE	21000	0	693	0	NE	4.32222	neg	2.84073	neg	Ext, Robot IDVET	07/05/2024	89	50-100 d	27	0-50 d	116	100-200 d	MAG FAST768: 034	80 µl	neat
2482-16	16	2024-02-08	2024	Winter	2	B	3	3 years	42	>24months	F	15/08/2020	Charolaise	Subclinical	42	pos	pos	pos	pos	neg	16S-Mex-CMh-	DI	5	21.72	30.74	30.11	30.86	0	NE	18000	409	27.1	0	NE	4.25527	2.61172	1.43297	neg	Ext, Robot IDVET	07/05/2024	89	50-100 d	27	0-50 d	116	100-200 d	MAG FAST768: 034	80 µl	neat
2498-16	16	2024-02-08	2024	Winter	2	B	3	3 years	36	>24months	F	23/02/2021	Charolaise	Subclinical	42	pos	pos	pos	pos	neg	16S-Mex-CMh-	DI	5	21.57	32.82	35.85	29.66	0	NE	10000	non-quantifiable	75.2	0	NE	4	non-quantifiable	1.87622	neg	Ext, Robot IDVET	07/05/2024	89	50-100 d	27	0-50 d	116	100-200 d	MAG FAST768: 034	80 µl	neat
2500-16	16	2024-02-08	2024	Winter	2	B	3	3 years	34	>24months	F	19/04/2021	Charolaise	Subclinical	42	pos	pos	pos	pos	pos	16S-Mex-CMh-Mass	TI	5	20.78	30.37	31.89	31.14	32.34	NE	19000	103	21.4	112	NE	4.27875	2.01284	1.33041	2.04922	Ext, Robot IDVET	07/05/2024	89	50-100 d	27	0-50 d	116	100-200 d	MAG FAST768: 034	80 µl	neat
2910-16	16	2024-02-08	2024	Winter	2	B	8	> 5 years	96	>24months	F	05/04/2016	Charolaise	Subclinical	42	pos	pos	pos	neg	pos	16S-Mex-Mass	DI	5	22.19	33.4	33.78	37.41	34.66	NE	7800	non-quantifiable	0	non-quantifiable	NE	3.89209	non-quantifiable	neg	non-quantifiable	Ext, Robot IDVET	07/05/2024	89	50-100 d	27	0-50 d	116	100-200 d	MAG FAST768: 034	80 µl	neat
3754-16	16	2024-02-08	2024	Winter	2	B	6	> 5 years	71	>24months	F	02/04/2018	Charolaise	Subclinical	42	pos	pos	neg	neg	neg	16S-	unknown	5	21.21	36.44	36.37	37.29	36.71	NE	non-quantifiable	0	0	0	NE	non-quantifiable	neg	neg	neg	Ext. Robot IDVET	07/05/2024	89	50-100 d	27	0-50 d	116	100-200 d	MAG FAST768: 034	80 µl	neat
4940-16	16	2024-02-08	2024	Winter	2	B	7	> 5 years	85	>24months	F	11/02/2017	Charolaise	Subclinical	42	pos	neg	neg	neg	neg	NI	NI	5	22.34	0	38.19	36.25	0	NE	0	0	0	0	NE	neg	neg	neg	neg	Ext. Robot IDVET	07/05/2024	89	50-100 d	27	0-50 d	116	100-200 d	MAG FAST768: 034	80 µl	neat
5764-16	16	2024-02-08	2024	Winter	2	B	5	4 -5 years	61	>24months	F	21/01/2019	Charolaise	Subclinical	42	pos	pos	neg	pos	neg	16S-CMh-	MI	5	22.73	34.22	0	31.86	37.93	NE	4700	0	11.6	0	NE	3.6721	neg	1.06446	neg	Ext, Robot IDVET	07/05/2024	89	50-100 d	27	0-50 d	116	100-200 d	MAG FAST768: 034	80 µl	neat
5794-16	16	2024-02-08	2024	Winter	2	B	5	4 -5 years	62	>24months	F	04/01/2019	Charolaise	Subclinical	42	pos	pos	neg	neg	neg	16S-	unknown	5	22.39	35.77	0	0	37.67	NE	non-quantifiable	0	0	0	NE	non-quantifiable	neg	neg	neg	Ext. Robot IDVET	07/05/2024	89	50-100 d	27	0-50 d	116	100-200 d	MAG FAST768: 034	80 µl	neat
5799-16	16	2024-02-08	2024	Winter	2	B	5	4 -5 years	55	>24months	F	20/07/2019	Charolaise	Subclinical	42	pos	neg	neg	pos	neg	CMh-	unknown	5	22.49	0	0	33.53	0	NE	0	0	non-quantifiable	0	NE	neg	neg	non-quantifiable	neg	Ext. Robot IDVET	07/05/2024	89	50-100 d	27	0-50 d	116	100-200 d	MAG FAST768: 034	80 µl	neat
5816-16	16	2024-02-08	2024	Winter	2	B	4	4 -5 years	51	>24months	F	29/11/2019	Charolaise	Subclinical	42	pos	pos	pos	pos	neg	16S-Mex-CMh-	DI	5	23.15	32.35	32.44	31.86	0	NE	12000	67	11.6	0	NE	4.07918	1.82607	1.06446	neg	Ext, Robot IDVET	07/05/2024	89	50-100 d	27	0-50 d	116	100-200 d	MAG FAST768: 034	80 µl	neat
5830-16	16	2024-02-08	2024	Winter	2	B	4	4 -5 years	49	>24months	F	02/02/2020	Charolaise	Subclinical	42	pos	pos	pos	pos	neg	16S-Mex-CMh-	DI	5	21.37	29.78	29.64	29.34	0	NE	21000	590	98.7	0	NE	4.32222	2.77085	1.99432	neg	Ext, Robot IDVET	07/05/2024	89	50-100 d	27	0-50 d	116	100-200 d	MAG FAST768: 034	80 µl	neat
5833-16	16	2024-02-08	2024	Winter	2	B	4	4 -5 years	48	>24months	F	26/02/2020	Charolaise	Subclinical	42	pos	pos	pos	pos	pos	16S-Mex-CMh-Mass	TI	5	22.48	29.33	29.22	30.79	33.25	NE	23000	817	28.8	non-quantifiable	NE	4.36173	2.91222	1.45939	non-quantifiable	Ext, Robot IDVET	07/05/2024	89	50-100 d	27	0-50 d	116	100-200 d	MAG FAST768: 034	80 µl	neat
5835-16	16	2024-02-08	2024	Winter	2	B	4	4 -5 years	51	>24months	F	09/12/2019	Charolaise	Subclinical	42	pos	pos	neg	pos	pos	16S-CMh-Mass	DI	5	22.91	28.52	0	30.5	30.33	NE	26000	0	36.8	379	NE	4.41497	neg	1.56585	2.57864	Ext, Robot IDVET	07/05/2024	89	50-100 d	27	0-50 d	116	100-200 d	MAG FAST768: 034	80 µl	neat
626-16	16	2024-02-08	2024	Winter	2	B	5	4 -5 years	62	>24months	M	01/01/2019	Charolaise	Subclinical	42	pos	pos	pos	pos	neg	16S-Mex-CMh-	DI	5	21.7	29.36	29.52	29.27	0	NE	23000	647	105	0	NE	4.36173	2.8109	2.02119	neg	Ext, Robot IDVET	07/05/2024	89	50-100 d	27	0-50 d	116	100-200 d	MAG FAST768: 034	80 µl	neat
8191-16	16	2024-02-08	2024	Winter	2	B	10	> 5 years	123	>24months	F	26/12/2013	Charolaise	Subclinical	42	pos	pos	neg	neg	neg	16S-	unknown	5	22.83	37.93	37.82	0	36.6	NE	non-quantifiable	0	0	0	NE	non-quantifiable	neg	neg	neg	Ext. Robot IDVET	07/05/2024	89	50-100 d	27	0-50 d	116	100-200 d	MAG FAST768: 034	80 µl	neat
8197-16	16	2024-02-08	2024	Winter	2	B	10	> 5 years	121	>24months	F	07/03/2014	Charolaise	Subclinical	42	pos	neg	neg	neg	neg	NI	NI	5	23.83	0	0	0	0	NE	0	0	0	0	NE	neg	neg	neg	neg	Ext. Robot IDVET	07/05/2024	89	50-100 d	27	0-50 d	116	100-200 d	MAG FAST768: 034	80 µl	neat
2651-26	26	2024-12-16	2024	Winter	12	B	15	> 5 years	188	>24months	F	02/07/2009	Salers	Subclinical	15	pos	pos	pos	pos	neg	16S-Mex-CMh-	DI	5	20.38	36.21	34.9	34.97	0	NE	non-quantifiable	non-quantifiable	non-quantifiable	0	NE	non-quantifiable	non-quantifiable	non-quantifiable	neg	Ext. Robot IDVET	14/03/2025	88	50-100 d	17	0-50 d	105	100-200 d	MAG FAST768: 034	80 µl	neat
2818-26	26	2024-12-16	2024	Winter	12	B	11	> 5 years	135	>24months	F	11/11/2013	Salers	Subclinical	15	pos	neg	neg	neg	neg	NI	NI	5	19.62	38.49	0	0	0	NE	0	0	0	0	NE	neg	neg	neg	neg	Ext. Robot IDVET	14/03/2025	88	50-100 d	17	0-50 d	105	100-200 d	MAG FAST768: 034	80 µl	neat
3756-26	26	2024-12-16	2024	Winter	12	B	0	0 -1 year	1	0-6 months	F	06/11/2024	Salers	Subclinical	15	pos	pos	neg	pos	neg	16S-CMh-	MI	5	19.42	36.6	0	34.66	0	NE	non-quantifiable	0	non-quantifiable	0	NE	non-quantifiable	neg	non-quantifiable	neg	Ext. Robot IDVET	14/03/2025	88	50-100 d	17	0-50 d	105	100-200 d	MAG FAST768: 034	80 µl	neat
3933-26	26	2024-12-16	2024	Winter	12	B	2	2 years	28	>24months	M	12/09/2022	Charolaise	Subclinical	15	pos	pos	pos	pos	neg	16S-Mex-CMh-	DI	5	20.11	29.52	30.93	27.72	0	NE	1540	920	269	0	NE	3.18752	2.96379	2.42975	neg	Ext, Robot IDVET	14/03/2025	88	50-100 d	17	0-50 d	105	100-200 d	MAG FAST768: 034	80 µl	neat
4359-26	26	2024-12-16	2024	Winter	12	B	9	> 5 years	104	>24months	F	31/05/2016	Salers	Subclinical	15	pos	pos	pos	neg	neg	16S-Mex-	MI	5	20.18	33.31	36	0	0	NE	168	non-quantifiable	0	0	NE	2.22531	non-quantifiable	neg	neg	Ext, Robot IDVET	14/03/2025	88	50-100 d	17	0-50 d	105	100-200 d	MAG FAST768: 034	80 µl	neat
5971-26	26	2024-12-16	2024	Winter	12	B	8	> 5 years	99	>24months	F	25/10/2016	Salers	Subclinical	15	pos	neg	neg	neg	neg	NI	NI	5	21.27	0	0	0	0	NE	0	0	0	0	NE	neg	neg	neg	neg	Ext. Robot IDVET	14/03/2025	88	50-100 d	17	0-50 d	105	100-200 d	MAG FAST768: 034	80 µl	neat
6749-26	26	2024-12-16	2024	Winter	12	B	6	> 5 years	76	>24months	F	30/09/2018	Salers	Subclinical	15	pos	pos	pos	neg	pos	16S-Mex-Mass	DI	5	20.46	31.45	31.53	0	31.66	NE	498	648	0	202	NE	2.69723	2.81158	neg	2.30535	Ext, Robot IDVET	14/03/2025	88	50-100 d	17	0-50 d	105	100-200 d	MAG FAST768: 034	80 µl	neat
6811-26	26	2024-12-16	2024	Winter	12	B	5	4 -5 years	64	>24months	F	26/09/2019	Salers	Subclinical	15	pos	pos	pos	pos	neg	16S-Mex-CMh-	DI	5	21.1	30.18	32.22	28.3	0	NE	1040	433	213	0	NE	3.01703	2.63649	2.32838	neg	Ext, Robot IDVET	14/03/2025	88	50-100 d	17	0-50 d	105	100-200 d	MAG FAST768: 034	80 µl	neat
7168-26	26	2024-12-16	2024	Winter	12	B	7	> 5 years	88	>24months	F	09/10/2017	Salers	Subclinical	15	pos	pos	neg	neg	neg	16S-	unknown	5	21.36	36.78	0	0	0	NE	non-quantifiable	0	0	0	NE	non-quantifiable	neg	neg	neg	Ext. Robot IDVET	14/03/2025	88	50-100 d	17	0-50 d	105	100-200 d	MAG FAST768: 034	80 µl	neat
8005-26	26	2024-12-16	2024	Winter	12	B	4	4 -5 years	51	>24months	F	25/09/2020	Salers	Subclinical	15	pos	pos	pos	pos	neg	16S-Mex-CMh-	DI	5	20.4	29.99	29.49	27.96	0	NE	1170	2130	244	0	NE	3.06819	3.32838	2.38739	neg	Ext, Robot IDVET	14/03/2025	88	50-100 d	17	0-50 d	105	100-200 d	MAG FAST768: 034	80 µl	neat
8007-26	26	2024-12-16	2024	Winter	12	B	4	4 -5 years	51	>24months	F	27/09/2020	Salers	Subclinical	15	pos	pos	pos	neg	neg	16S-Mex-	MI	5	21.17	35.34	34.66	0	37.13	NE	non-quantifiable	non-quantifiable	0	0	NE	non-quantifiable	non-quantifiable	neg	neg	Ext. Robot IDVET	14/03/2025	88	50-100 d	17	0-50 d	105	100-200 d	MAG FAST768: 034	80 µl	neat
159-39	39	2021-11-16	2021	Automn	11	B	1	0 -1 year	14	12-18 months	F	23/09/2020	Limousine	clinical	12	pos	pos	pos	pos	neg	16S-Mex-CMh-	DI	5	22.55	31.08	30.37	30.37	35.66	14500	576	1260	1260	0	4.16137	2.76042	3.10037	3.10037	neg	Ext, Kit Qiagen	17/11/2021	1	0-50 d	1146	>100 d	1147	>200 d	kit 169031338	100 µl	10-2
5423-6	6	2023-11-02	2023	Automn	11	D	2	2 years	26	>24months	F	16/09/2021	HF	Subclinical	81	pos	pos	pos	pos	neg	16S-Mex-CMh-	DI	5	16.27	25.51	26.81	28.75	0	NE	NE	NE	NE	0	NE	NE	NE	NE	neg	Ext. Robot IDVET	03/11/2023	1	0-50 d	10	0-50 d	11	0-100 d	MAG FAST768: 034	80 µl	neat
5432-6	6	2023-11-02	2023	Automn	11	D	2	2 years	24	18 months-24 months	F	25/11/2021	HF	Subclinical	81	pos	pos	pos	pos	neg	16S-Mex-CMh-	DI	5	15.12	26.6	33.28	26.89	35.89	NE	NE	NE	NE	0	NE	NE	NE	NE	neg	Ext. Robot IDVET	07/12/2023	35	0-50 d	1	0-50 d	36	0-100 d	MAG FAST768: 034	80 µl	neat
5434-6	6	2023-11-02	2023	Automn	11	D	2	2 years	24	18 months-24 months	F	27/11/2021	HF	Subclinical	81	pos	pos	pos	pos	pos	16S-Mex-CMh-Mass	TI	5	17.3	25.56	26.64	26.91	29.99	NE	NE	NE	NE	NE	NE	NE	NE	NE	NE	Ext. Robot IDVET	03/11/2023	1	0-50 d	10	0-50 d	11	0-100 d	MAG FAST768: 034	80 µl	neat
5445-6	6	2023-11-02	2023	Automn	11	D	2	2 years	21	18 months-24 months	F	22/02/2022	HF	Subclinical	81	pos	pos	pos	pos	pos	16S-Mex-CMh-Mass	TI	5	16.06	27.06	28.99	28.12	31.67	NE	NE	NE	NE	NE	NE	NE	NE	NE	NE	Ext. Robot IDVET	03/11/2023	1	0-50 d	10	0-50 d	11	0-100 d	MAG FAST768: 034	80 µl	neat
6022-6	6	2023-11-02	2023	Automn	11	D	3	3 years	33	>24months	F	05/02/2021	HF	Subclinical	81	pos	pos	neg	pos	neg	16S-CMh-	MI	5	16.83	27.81	35.9	25.79	0	NE	NE	0	NE	0	NE	NE	neg	NE	neg	Ext. Robot IDVET	03/11/2023	1	0-50 d	10	0-50 d	11	0-100 d	MAG FAST768: 034	80 µl	neat
5440-6	6	2024-09-02	2024	Automn	9	D	3	3 years	33	>24months	F	05/12/2021	HF	Subclinical	81	pos	pos	pos	pos	neg	16S-Mex-CMh-	DI	5	15.55	27.79	30.04	30.1	0	129000	1070	1940	6590	0	5.11059	3.02938	3.2878	3.81889	neg	Ext, Robot IDVET	20/09/2024	18	0-50 d	5	0-50 d	23	0-100 d	MAG FAST768: 034	80 µl	neat
5441-6	6	2024-09-02	2024	Automn	9	D	3	3 years	33	>24months	F	22/12/2021	HF	Subclinical	81	pos	pos	pos	pos	neg	16S-Mex-CMh-	DI	5	15.07	27.64	32.12	28.43	0	142000	1180	636	15600	0	5.15229	3.07188	2.80346	4.19312	neg	Ext, Robot IDVET	20/09/2024	18	0-50 d	5	0-50 d	23	0-100 d	MAG FAST768: 034	80 µl	neat
5450-6	6	2024-09-02	2024	Automn	9	D	2	2 years	28	>24months	F	03/05/2022	HF	Subclinical	81	pos	pos	pos	pos	pos	16S-Mex-CMh-Mass	TI	5	15.03	24.4	30.44	26.48	26.75	143000	8400	1560	42900	1790	5.15534	3.92428	3.19312	4.63246	3.25285	Ext, Robot IDVET	20/09/2024	18	0-50 d	5	0-50 d	23	0-100 d	MAG FAST768: 034	80 µl	neat
8021-6	6	2024-09-02	2024	Automn	9	D	2	2 years	25	>24months	F	19/08/2022	HF	Subclinical	81	pos	pos	pos	pos	pos	16S-Mex-CMh-Mass	TI	5	15.4	28.39	30.37	34.27	34.61	133000	745	1620	non-quantifiable	31.2	5.12385	2.87216	3.20952	non-quantifiable	1.49415	Ext, Robot IDVET	20/09/2024	18	0-50 d	5	0-50 d	23	0-100 d	MAG FAST768: 034	80 µl	neat
8023-6	6	2024-09-02	2024	Automn	9	D	2	2 years	25	>24months	F	20/08/2022	crossbred	Subclinical	81	pos	pos	pos	pos	neg	16S-Mex-CMh-	DI	5	15.37	24.69	26.38	28.24	0	134000	7020	13800	17200	0	5.1271	3.84634	4.13988	4.23553	neg	Ext, Robot IDVET	20/09/2024	18	0-50 d	5	0-50 d	23	0-100 d	MAG FAST768: 034	80 µl	neat
8024-6	6	2024-09-02	2024	Automn	9	D	2	2 years	25	>24months	F	21/08/2022	HF	Subclinical	81	pos	pos	pos	pos	pos	16S-Mex-CMh-Mass	TI	5	15.11	22.2	27.08	27.28	28.04	141000	31900	9450	28400	921	5.14922	4.50379	3.97543	4.45332	2.96426	Ext, Robot IDVET	20/09/2024	18	0-50 d	5	0-50 d	23	0-100 d	MAG FAST768: 034	80 µl	neat
8025-6	6	2024-09-02	2024	Automn	9	D	2	2 years	26	>24months	F	19/07/2022	HF	Subclinical	81	pos	pos	pos	pos	neg	16S-Mex-CMh-	DI	5	15.06	26.18	28.64	29.55	0	143000	2850	4100	8740	0	5.15534	3.45484	3.61278	3.94151	neg	Ext, Robot IDVET	20/09/2024	18	0-50 d	5	0-50 d	23	0-100 d	MAG FAST768: 034	80 µl	neat
8027-6	6	2024-09-02	2024	Automn	9	D	2	2 years	25	>24months	F	16/08/2022	HF	Subclinical	81	pos	pos	pos	pos	neg	16S-Mex-CMh-	DI	5	15.12	28.15	30.35	34.18	0	141000	863	1650	non-quantifiable	0	5.14922	2.93601	3.21748	non-quantifiable	neg	Ext, Robot IDVET	20/09/2024	18	0-50 d	5	0-50 d	23	0-100 d	MAG FAST768: 034	80 µl	neat
8028-6	6	2024-09-02	2024	Automn	9	D	2	2 years	24	18 months-24 months	F	01/09/2022	HF	Subclinical	81	pos	pos	pos	pos	neg	16S-Mex-CMh-	DI	5	15.69	29.4	34.5	28.44	35.76	126000	405	178	15500	0	5.10037	2.60746	2.25042	4.19033	neg	Ext, Robot IDVET	20/09/2024	18	0-50 d	5	0-50 d	23	0-100 d	MAG FAST768: 034	80 µl	neat
8029-6	6	2024-09-02	2024	Automn	9	D	2	2 years	24	18 months-24 months	F	01/09/2022	jersey	Subclinical	81	pos	pos	pos	pos	neg	16S-Mex-CMh-	DI	5	17.13	29.11	28.59	32.93	0	94500	484	4220	non-quantifiable	0	4.97543	2.68485	3.62531	non-quantifiable	neg	Ext, Robot IDVET	20/09/2024	18	0-50 d	5	0-50 d	23	0-100 d	MAG FAST768: 034	80 µl	neat
8030-6	6	2024-09-02	2024	Automn	9	D	2	2 years	24	18 months-24 months	F	02/09/2022	jersey	Subclinical	81	pos	pos	pos	neg	neg	16S-Mex-	MI	5	15.66	33.04	34.27	0	0	126000	44.7	201	0	0	5.10037	1.65031	2.3032	neg	neg	Ext, Robot IDVET	20/09/2024	18	0-50 d	5	0-50 d	23	0-100 d	MAG FAST768: 034	80 µl	neat
1603-6	6	2024-04-17	2024	Spring	4	D	1	0 -1 year	8	6-12 months	F	23/08/2023	HF	Subclinical	81	pos	neg	neg	neg	neg	NI	NI	5	18.76	0	0	0	0	NE	0	0	0	0	NE	neg	neg	neg	neg	Ext. Robot IDVET	22/05/2024	35	0-50 d	15	0-50 d	50	0-100 d	MAG FAST768: 034	80 µl	neat
1604-6	6	2024-04-17	2024	Spring	4	D	1	0 -1 year	7	6-12 months	F	17/09/2023	jersey	Subclinical	81	pos	neg	neg	neg	neg	NI	NI	5	18.34	0	0	0	0	NE	0	0	0	0	NE	neg	neg	neg	neg	Ext. Robot IDVET	22/05/2024	35	0-50 d	15	0-50 d	50	0-100 d	MAG FAST768: 034	80 µl	neat
1664-6	6	2024-04-17	2024	Spring	4	D	1	0 -1 year	7	6-12 months	F	05/10/2023	Galloway	Subclinical	81	pos	neg	neg	neg	neg	NI	NI	5	17.83	0	0	0	0	NE	0	0	0	0	NE	neg	neg	neg	neg	Ext. Robot IDVET	22/05/2024	35	0-50 d	15	0-50 d	50	0-100 d	MAG FAST768: 034	80 µl	neat
5311-6	6	2024-04-17	2024	Spring	4	D	3	3 years	37	>24months	F	12/04/2021	Hereford	Subclinical	81	pos	pos	neg	neg	pos	16S-Mass	MI	5	18.39	21.67	0	0	25.93	NE	26000	0	0	4280	NE	4.41497	neg	neg	3.63144	Ext, Robot IDVET	22/05/2024	35	0-50 d	15	0-50 d	50	0-100 d	MAG FAST768: 034	80 µl	neat
5438-6	6	2024-04-17	2024	Spring	4	D	2	2 years	29	>24months	F	03/12/2021	HF	Subclinical	81	pos	pos	pos	pos	neg	16S-Mex-CMh-	DI	5	18.51	22.26	25.34	33.53	0	NE	19000	16400	non-quantifiable	0	NE	4.27875	4.21484	non-quantifiable	neg	Ext, Robot IDVET	22/05/2024	35	0-50 d	15	0-50 d	50	0-100 d	MAG FAST768: 034	80 µl	neat
5446-6	6	2024-04-17	2024	Spring	4	D	2	2 years	25	>24months	F	11/04/2022	HF	Subclinical	81	pos	pos	pos	neg	neg	16S-Mex-	MI	5	17.9	25.51	25.35	0	0	NE	10500	16300	0	0	NE	4.02119	4.21219	neg	neg	Ext, Robot IDVET	22/05/2024	35	0-50 d	15	0-50 d	50	0-100 d	MAG FAST768: 034	80 µl	neat
5452-6	6	2024-04-17	2024	Spring	4	D	2	2 years	22	18 months-24 months	F	14/06/2022	Hereford	Subclinical	81	pos	pos	neg	pos	pos	16S-CMh-Mass	DI	5	18.21	22.69	0	30.29	28	NE	15000	0	34.1	1140	NE	4.17609	neg	1.53275	3.0569	Ext, Robot IDVET	22/05/2024	35	0-50 d	15	0-50 d	50	0-100 d	MAG FAST768: 034	80 µl	neat
5453-6	6	2024-04-17	2024	Spring	4	D	2	2 years	22	18 months-24 months	F	15/06/2022	crossbred	Subclinical	81	pos	pos	pos	pos	pos	16S-Mex-CMh-Mass	TI	5	18.34	19.56	24.31	30	24.95	NE	87000	28900	44.5	8030	NE	4.93952	4.4609	1.64836	3.90472	Ext, Robot IDVET	22/05/2024	35	0-50 d	15	0-50 d	50	0-100 d	MAG FAST768: 034	80 µl	neat
5471-6	6	2024-04-17	2024	Spring	4	D	3	3 years	31	>24months	F	12/10/2021	Angus	Subclinical	81	pos	pos	neg	neg	pos	16S-Mass	MI	5	18.95	25.96	0	0	31.51	NE	2300	0	0	120	NE	3.36173	neg	neg	2.07918	Ext, Robot IDVET	22/05/2024	35	0-50 d	15	0-50 d	50	0-100 d	MAG FAST768: 034	80 µl	neat
5474-6	6	2024-04-17	2024	Spring	4	D	2	2 years	30	>24months	F	19/10/2021	crossbred	Subclinical	81	pos	pos	pos	pos	neg	16S-Mex-CMh-	DI	5	17.98	26.27	29.58	27.35	0	NE	1900	1570	513	0	NE	3.27875	3.1959	2.71012	neg	Ext, Robot IDVET	22/05/2024	35	0-50 d	15	0-50 d	50	0-100 d	MAG FAST768: 034	80 µl	neat
5501-6	6	2024-04-17	2024	Spring	4	D	1	0 -1 year	15	12-18 months	M	17/01/2023	Angus	Subclinical	81	pos	pos	pos	pos	neg	16S-Mex-CMh-	DI	5	18.45	25.42	28.46	27.85	0	NE	3100	2910	323	0	NE	3.49136	3.46389	2.5092	neg	Ext, Robot IDVET	22/05/2024	35	0-50 d	15	0-50 d	50	0-100 d	MAG FAST768: 034	80 µl	neat
5502-6	6	2024-04-17	2024	Spring	4	D	1	0 -1 year	13	12-18 months	F	15/03/2023	Angus	Subclinical	81	pos	neg	neg	neg	neg	NI	NI	5	17.78	0	0	0	0	NE	0	0	0	0	NE	neg	neg	neg	neg	Ext. Robot IDVET	22/05/2024	35	0-50 d	15	0-50 d	50	0-100 d	MAG FAST768: 034	80 µl	neat
5507-6	6	2024-04-17	2024	Spring	4	D	1	0 -1 year	17	12-18 months	F	02/12/2022	wagyu	Subclinical	81	pos	pos	pos	pos	neg	16S-Mex-CMh-	DI	5	18.22	24.77	27.67	28.68	0	NE	4500	4510	150	0	NE	3.65321	3.65418	2.17609	neg	Ext, Robot IDVET	22/05/2024	35	0-50 d	15	0-50 d	50	0-100 d	MAG FAST768: 034	80 µl	neat
5512-6	6	2024-04-17	2024	Spring	4	D	2	2 years	18	12-18 months	M	16/10/2022	Angus	Subclinical	81	pos	pos	pos	pos	neg	16S-Mex-CMh-	DI	5	18.6	26.77	27.09	30.09	0	NE	4990	6210	41	0	NE	3.6981	3.79309	1.61278	neg	Ext, Robot IDVET	22/05/2024	35	0-50 d	15	0-50 d	50	0-100 d	MAG FAST768: 034	80 µl	neat
5519-6	6	2024-04-17	2024	Spring	4	D	2	2 years	19	18 months-24 months	F	13/09/2022	wagyu	Subclinical	81	pos	pos	pos	pos	neg	16S-Mex-CMh-	DI	5	17.61	24.45	26.94	27.86	0	NE	5500	6750	320	0	NE	3.74036	3.8293	2.50515	neg	Ext, Robot IDVET	22/05/2024	35	0-50 d	15	0-50 d	50	0-100 d	MAG FAST768: 034	80 µl	neat
5522-6	6	2024-04-17	2024	Spring	4	D	2	2 years	21	18 months-24 months	F	03/08/2022	Hereford	Subclinical	81	pos	pos	pos	pos	pos	16S-Mex-CMh-Mass	TI	5	17.82	24.27	29.66	26.36	30.01	NE	6000	1500	1280	314	NE	3.77815	3.17609	3.10721	2.49693	Ext, Robot IDVET	22/05/2024	35	0-50 d	15	0-50 d	50	0-100 d	MAG FAST768: 034	80 µl	neat
5527-6	6	2024-04-17	2024	Spring	4	D	2	2 years	21	18 months-24 months	F	02/08/2022	Angus	Subclinical	81	pos	pos	pos	pos	neg	16S-Mex-CMh-	DI	5	18.58	28.69	28.97	31.33	0	NE	1600	2200	13.1	0	NE	3.20412	3.34242	1.11727	neg	Ext, Robot IDVET	22/05/2024	35	0-50 d	15	0-50 d	50	0-100 d	MAG FAST768: 034	80 µl	neat
5533-6	6	2024-04-17	2024	Spring	4	D	1	0 -1 year	17	12-18 months	F	20/11/2022	jersey	Subclinical	81	pos	pos	pos	pos	pos	16S-Mex-CMh-Mass	TI	5	19.12	29.3	29.35	29.56	30.85	NE	1110	1780	66.8	183	NE	3.04532	3.25042	1.82478	2.26245	Ext, Robot IDVET	22/05/2024	35	0-50 d	15	0-50 d	50	0-100 d	MAG FAST768: 034	80 µl	neat
5534-6	6	2024-04-17	2024	Spring	4	D	1	0 -1 year	16	12-18 months	F	10/12/2022	jersey	Subclinical	81	pos	pos	pos	pos	neg	16S-Mex-CMh-	DI	5	18.96	24.38	27.24	28.24	0	NE	5700	5720	226	0	NE	3.75587	3.7574	2.35411	neg	Ext, Robot IDVET	22/05/2024	35	0-50 d	15	0-50 d	50	0-100 d	MAG FAST768: 034	80 µl	neat
5535-6	6	2024-04-17	2024	Spring	4	D	1	0 -1 year	14	12-18 months	F	09/02/2023	HF	Subclinical	81	pos	pos	pos	neg	neg	16S-Mex-	MI	5	18.71	21.59	24.9	0	0	NE	28000	20900	0	0	NE	4.44716	4.32015	neg	neg	Ext, Robot IDVET	22/05/2024	35	0-50 d	15	0-50 d	50	0-100 d	MAG FAST768: 034	80 µl	neat
5536-6	6	2024-04-17	2024	Spring	4	D	1	0 -1 year	10	6-12 months	F	22/06/2023	jersey	Subclinical	81	pos	neg	neg	neg	neg	NI	NI	5	18.57	0	0	0	0	NE	0	0	0	0	NE	neg	neg	neg	neg	Ext. Robot IDVET	22/05/2024	35	0-50 d	15	0-50 d	50	0-100 d	MAG FAST768: 034	80 µl	neat
5537-6	6	2024-04-17	2024	Spring	4	D	1	0 -1 year	10	6-12 months	F	07/07/2023	HF	Subclinical	81	pos	neg	neg	neg	neg	NI	NI	5	17.47	0	0	0	0	NE	0	0	0	0	NE	neg	neg	neg	neg	Ext. Robot IDVET	22/05/2024	35	0-50 d	15	0-50 d	50	0-100 d	MAG FAST768: 034	80 µl	neat
5539-6	6	2024-04-17	2024	Spring	4	D	1	0 -1 year	9	6-12 months	F	09/07/2023	jersey	Subclinical	81	pos	pos	neg	neg	neg	16S-	unknown	5	17.1	35.34	0	0	0	NE	non-quantifiable	0	0	0	NE	non-quantifiable	neg	neg	neg	Ext. Robot IDVET	22/05/2024	35	0-50 d	15	0-50 d	50	0-100 d	MAG FAST768: 034	80 µl	neat
5540-6	6	2024-04-17	2024	Spring	4	D	1	0 -1 year	9	6-12 months	F	12/07/2023	Froment du Léon	Subclinical	81	pos	neg	neg	neg	neg	NI	NI	5	18.55	0	0	0	0	NE	0	0	0	0	NE	neg	neg	neg	neg	Ext. Robot IDVET	22/05/2024	35	0-50 d	15	0-50 d	50	0-100 d	MAG FAST768: 034	80 µl	neat
5796-6	6	2024-04-17	2024	Spring	4	D	7	> 5 years	84	>24months	F	02/06/2017	crossbred	Subclinical	81	pos	pos	neg	neg	pos	16S-Mass	MI	5	19.14	32.82	0	0	32.92	NE	138	0	0	48.6	NE	2.13988	neg	neg	1.68664	Ext, Robot IDVET	22/05/2024	35	0-50 d	15	0-50 d	50	0-100 d	MAG FAST768: 034	80 µl	neat
5826-6	6	2024-04-17	2024	Spring	4	D	6	> 5 years	71	>24months	F	28/06/2018	HF	Subclinical	81	pos	pos	neg	neg	pos	16S-Mass	MI	5	17.99	26.9	0	0	33.21	NE	1400	0	0	non-quantifiable	NE	3.14613	neg	neg	non-quantifiable	Ext, Robot IDVET	22/05/2024	35	0-50 d	15	0-50 d	50	0-100 d	MAG FAST768: 034	80 µl	neat
5838-6	6	2024-04-17	2024	Spring	4	D	6	> 5 years	67	>24months	F	15/10/2018	HF	Subclinical	81	pos	pos	pos	neg	pos	16S-Mex-Mass	DI	5	18.6	26.27	30.7	0	32.22	NE	1900	845	0	76.2	NE	3.27875	2.92686	neg	1.88195	Ext, Robot IDVET	22/05/2024	35	0-50 d	15	0-50 d	50	0-100 d	MAG FAST768: 034	80 µl	neat
5869-6	6	2024-04-17	2024	Spring	4	D	6	> 5 years	68	>24months	F	07/09/2018	crossbred	Subclinical	81	pos	pos	pos	pos	neg	16S-Mex-CMh-	DI	5	18.96	29.43	30.15	30.88	0	NE	1030	1150	19.8	0	NE	3.01284	3.0607	1.29667	neg	Ext, Robot IDVET	22/05/2024	35	0-50 d	15	0-50 d	50	0-100 d	MAG FAST768: 034	80 µl	neat
5870-6	6	2024-04-17	2024	Spring	4	D	6	> 5 years	68	>24months	F	06/09/2018	crossbred	Subclinical	81	pos	pos	pos	pos	neg	16S-Mex-CMh-	DI	5	17.96	29.6	31.09	28.72	0	NE	931	681	145	0	NE	2.96895	2.83315	2.16137	neg	Ext, Robot IDVET	22/05/2024	35	0-50 d	15	0-50 d	50	0-100 d	MAG FAST768: 034	80 µl	neat
5872-6	6	2024-04-17	2024	Spring	4	D	6	> 5 years	69	>24months	F	20/08/2018	crossbred	Subclinical	81	pos	pos	pos	pos	neg	16S-Mex-CMh-	DI	5	21.88	31.26	33.43	32.55	0	NE	120	non-quantifiable	non-quantifiable	0	NE	2.07918	non-quantifiable	non-quantifiable	neg	Ext, Robot IDVET	22/05/2024	35	0-50 d	15	0-50 d	50	0-100 d	MAG FAST768: 034	80 µl	neat
5993-6	6	2024-04-17	2024	Spring	4	D	5	4 -5 years	56	>24months	F	11/09/2019	HF	Subclinical	81	pos	pos	neg	pos	neg	16S-CMh-	MI	5	18.94	28.89	0	31.62	36.08	NE	1420	0	9.99	0	NE	3.15229	neg	0.999565	neg	Ext, Robot IDVET	22/05/2024	35	0-50 d	15	0-50 d	50	0-100 d	MAG FAST768: 034	80 µl	neat
6000-6	6	2024-04-17	2024	Spring	4	D	4	4 -5 years	53	>24months	F	01/12/2019	HF	Subclinical	81	pos	pos	pos	pos	neg	16S-Mex-CMh-	DI	5	18.97	29.86	31.59	33.92	0	NE	250	517	non-quantifiable	0	NE	2.39794	2.71349	non-quantifiable	neg	Ext, Robot IDVET	22/05/2024	35	0-50 d	15	0-50 d	50	0-100 d	MAG FAST768: 034	80 µl	neat
6027-6	6	2024-04-17	2024	Spring	4	D	4	4 -5 years	54	>24months	F	22/11/2019	wagyu	Subclinical	81	pos	pos	pos	pos	neg	16S-Mex-CMh-	DI	5	18.05	30.47	34.96	30.67	0	NE	180	non-quantifiable	24	0	NE	2.25527	non-quantifiable	1.38021	neg	Ext, Robot IDVET	22/05/2024	35	0-50 d	15	0-50 d	50	0-100 d	MAG FAST768: 034	80 µl	neat
6028-6	6	2024-04-17	2024	Spring	4	D	4	4 -5 years	54	>24months	F	21/11/2019	Angus	Subclinical	81	pos	pos	pos	pos	neg	16S-Mex-CMh-	DI	5	18.02	28.23	28.44	30.91	0	NE	2100	2950	19.2	0	NE	3.32222	3.46982	1.2833	neg	Ext, Robot IDVET	22/05/2024	35	0-50 d	15	0-50 d	50	0-100 d	MAG FAST768: 034	80 µl	neat
8022-6	6	2024-04-17	2024	Spring	4	D	2	2 years	20	18 months-24 months	F	20/08/2022	HF	Subclinical	81	pos	pos	pos	pos	pos	16S-Mex-CMh-Mass	TI	5	18.14	23.17	26.48	29.29	25.21	NE	42200	8710	85.7	6790	NE	4.62531	3.94002	1.93298	3.83187	Ext, Robot IDVET	22/05/2024	35	0-50 d	15	0-50 d	50	0-100 d	MAG FAST768: 034	80 µl	neat
204-2	2	2024-09-13	2024	Automn	9	D	4	4 -5 years	43	>24months	F	10/03/2021	Salers	clinical	15	pos	neg	neg	neg	neg	NI	NI	5	16.68	0	0	0	0	103000	0	0	0	0	5.012837224705172	neg	neg	neg	neg	Ext. Robot IDVET	20/09/2024	7	0-50 d	5	0-50 d	12	0-100 d	MAG FAST768: 034	80 µl	neat
1118-2	2	2025-01-11	2025	Winter	1	D	4	4 -5 years	53	>24months	F	09/09/2020	HF	Subclinical	15	pos	pos	neg	pos	neg	16S-CMh-	MI	5	19	29.09	0	26.73	0	NE	4730	0	1040	0	NE	3.67486	neg	3.01703	neg	Ext, Robot IDVET	27/03/2025	75	50-100 d	8	0-50 d	83	0-100 d	MAG FAST768: 034	80 µl	neat
1119-2	2	2025-01-11	2025	Winter	1	D	4	4 -5 years	53	>24months	F	11/09/2020	brown suiss	Subclinical	15	pos	pos	neg	pos	neg	16S-CMh-	MI	5	20.04	33.5	0	29.57	35.7	NE	163	0	83.2	0	NE	2.21219	neg	1.92012	neg	Ext, Robot IDVET	27/03/2025	75	50-100 d	8	0-50 d	83	0-100 d	MAG FAST768: 034	80 µl	neat
1120-2	2	2025-01-11	2025	Winter	1	D	4	4 -5 years	53	>24months	F	12/09/2020	HF	Subclinical	15	pos	pos	pos	neg	neg	16S-Mex-	MI	5	17.95	32.71	30.05	36.68	0	NE	650	465	0	0	NE	2.81291	2.66745	neg	neg	Ext, Robot IDVET	27/03/2025	75	50-100 d	8	0-50 d	83	0-100 d	MAG FAST768: 034	80 µl	neat
1122-2	2	2025-01-11	2025	Winter	1	D	4	4 -5 years	53	>24months	F	16/09/2020	HF	Subclinical	15	pos	pos	pos	neg	neg	16S-Mex-	MI	5	18.34	34.04	32.04	0	0	NE	296	12.4	0	0	NE	2.47129	1.09342	neg	neg	Ext, Robot IDVET	27/03/2025	75	50-100 d	8	0-50 d	83	0-100 d	MAG FAST768: 034	80 µl	neat
1132-2	2	2025-01-11	2025	Winter	1	D	4	4 -5 years	52	>24months	F	09/10/2020	HF	Subclinical	15	pos	pos	neg	pos	neg	16S-CMh-	MI	5	17.87	33.83	0	29.73	0	NE	335	0	216	0	NE	2.52504	neg	2.33445	neg	Ext, Robot IDVET	27/03/2025	75	50-100 d	8	0-50 d	83	0-100 d	MAG FAST768: 034	80 µl	neat
1135-2	2	2025-01-11	2025	Winter	1	D	4	4 -5 years	52	>24months	F	19/10/2020	HF	Subclinical	15	pos	pos	pos	pos	neg	16S-Mex-CMh-	DI	5	18.45	29.85	28.99	31.18	0	NE	3530	3200	55.9	0	NE	3.54777	3.50515	1.74741	neg	Ext, Robot IDVET	27/03/2025	75	50-100 d	8	0-50 d	83	0-100 d	MAG FAST768: 034	80 µl	neat
1141-2	2	2025-01-11	2025	Winter	1	D	4	4 -5 years	51	>24months	F	07/11/2020	HF	Subclinical	15	pos	pos	pos	pos	neg	16S-Mex-CMh-	DI	5	21.76	30.72	31.41	28.58	0	NE	1360	14.2	201	0	NE	3.13354	1.15229	2.3032	neg	Ext, Robot IDVET	27/03/2025	75	50-100 d	8	0-50 d	83	0-100 d	MAG FAST768: 034	80 µl	neat
1142-2	2	2025-01-11	2025	Winter	1	D	4	4 -5 years	51	>24months	F	10/11/2020	HF	Subclinical	15	pos	pos	pos	pos	neg	16S-Mex-CMh-	DI	5	18.39	29.17	27.58	29.43	0	NE	5270	41800	285	0	NE	3.72181	4.62118	2.45484	neg	Ext, Robot IDVET	27/03/2025	75	50-100 d	8	0-50 d	83	0-100 d	MAG FAST768: 034	80 µl	neat
1143-2	2	2025-01-11	2025	Winter	1	D	4	4 -5 years	51	>24months	F	12/11/2020	HF	Subclinical	15	pos	pos	pos	pos	neg	16S-Mex-CMh-	DI	5	21.68	35.09	29.89	29.89	0	NE	non-quantifiable	17900	122	0	NE	non-quantifiable	4.2528530309798933	2.0863598306747484	neg	Ext. Robot IDVET	27/03/2025	75	50-100 d	8	0-50 d	83	0-100 d	MAG FAST768: 034	80 µl	neat
1165-2	2	2025-01-11	2025	Winter	1	D	4	4 -5 years	49	>24months	F	21/12/2020	HF	Subclinical	15	pos	pos	pos	pos	neg	16S-Mex-CMh-	DI	5	18.45	33.96	32.39	31.08	0	NE	310	6.56	61.4	0	NE	2.49136	0.816904	1.78817	neg	Ext, Robot IDVET	27/03/2025	75	50-100 d	8	0-50 d	83	0-100 d	MAG FAST768: 034	80 µl	neat
1167-2	2	2025-01-11	2025	Winter	1	D	4	4 -5 years	49	>24months	F	25/12/2020	HF	Subclinical	15	pos	pos	pos	neg	pos	16S-Mex-Mass	DI	5	19.75	32.06	30.17	36.74	34.1	NE	955	374	0	non-quantifiable	NE	2.98	2.57287	neg	non-quantifiable	Ext, Robot IDVET	27/03/2025	75	50-100 d	8	0-50 d	83	0-100 d	MAG FAST768: 034	80 µl	neat
1168-2	2	2025-01-11	2025	Winter	1	D	4	4 -5 years	49	>24months	F	25/12/2020	HF	Subclinical	15	pos	pos	pos	pos	neg	16S-Mex-CMh-	DI	5	18.29	36.54	34.5	34	0	NE	67.5	non-quantifiable	non-quantifiable	0	NE	1.8293	non-quantifiable	non-quantifiable	neg	Ext, Robot IDVET	27/03/2025	75	50-100 d	8	0-50 d	83	0-100 d	MAG FAST768: 034	80 µl	neat
1175-2	2	2025-01-11	2025	Winter	1	D	4	4 -5 years	49	>24months	F	06/01/2021	HF	Subclinical	15	pos	pos	pos	pos	neg	16S-Mex-CMh-	DI	5	18.56	29.12	27.82	34.81	0	NE	4620	12200	non-quantifiable	0	NE	3.66464	4.08636	non-quantifiable	neg	Ext, Robot IDVET	27/03/2025	75	50-100 d	8	0-50 d	83	0-100 d	MAG FAST768: 034	80 µl	neat
1176-2	2	2025-01-11	2025	Winter	1	D	4	4 -5 years	49	>24months	F	08/01/2021	HF	Subclinical	15	pos	pos	pos	pos	neg	16S-Mex-CMh-	DI	5	19.65	30.93	28.7	35.89	35.01	NE	1860	5430	non-quantifiable	0	NE	3.26951	3.7348	non-quantifiable	neg	Ext, Robot IDVET	27/03/2025	75	50-100 d	8	0-50 d	83	0-100 d	MAG FAST768: 034	80 µl	neat
1181-2	2	2025-01-11	2025	Winter	1	D	4	4 -5 years	49	>24months	F	14/01/2021	brown suiss	Subclinical	15	pos	pos	pos	pos	pos	16S-Mex-CMh-Mass	TI	5	18.28	26.83	30.3	27.31	27.28	NE	21000	295	2050	14800	NE	4.32222	2.46982	3.31175	4.17026	Ext, Robot IDVET	27/03/2025	75	50-100 d	8	0-50 d	83	0-100 d	MAG FAST768: 034	80 µl	neat
1190-2	2	2025-01-11	2025	Winter	1	D	4	4 -5 years	48	>24months	F	09/02/2021	Salers	Subclinical	15	pos	pos	pos	pos	neg	16S-Mex-CMh-	DI	5	21.25	28.38	30.48	30.48	0	NE	7630	4860	94.3	0	NE	3.88252	3.68664	1.97451	neg	Ext, Robot IDVET	27/03/2025	75	50-100 d	8	0-50 d	83	0-100 d	MAG FAST768: 034	80 µl	neat
1193-2	2	2025-01-11	2025	Winter	1	D	4	4 -5 years	48	>24months	F	12/02/2021	Salers	Subclinical	15	pos	pos	neg	neg	neg	16S-	unknown	5	21.66	36.88	36.17	36.17	0	NE	non-quantifiable	0	0	0	NE	non-quantifiable	neg	neg	neg	Ext. Robot IDVET	27/03/2025	75	50-100 d	8	0-50 d	83	0-100 d	MAG FAST768: 034	80 µl	neat
1194-2	2	2025-01-11	2025	Winter	1	D	4	4 -5 years	48	>24months	F	13/02/2021	HF	Subclinical	15	pos	pos	neg	pos	neg	16S-CMh-	MI	5	18.53	30.11	0	27.35	0	NE	3020	0	1980	0	NE	3.48001	neg	3.29667	neg	Ext, Robot IDVET	27/03/2025	75	50-100 d	8	0-50 d	83	0-100 d	MAG FAST768: 034	80 µl	neat
1201-2	2	2025-01-11	2025	Winter	1	D	4	4 -5 years	47	>24months	F	02/03/2021	HF	Subclinical	15	pos	pos	neg	pos	neg	16S-CMh-	MI	5	17.86	35.68	0	34.38	0	NE	non-quantifiable	0	non-quantifiable	0	NE	non-quantifiable	neg	non-quantifiable	neg	Ext. Robot IDVET	27/03/2025	75	50-100 d	8	0-50 d	83	0-100 d	MAG FAST768: 034	80 µl	neat
1205-2	2	2025-01-11	2025	Winter	1	D	4	4 -5 years	47	>24months	F	12/03/2021	brown suiss	Subclinical	15	pos	pos	pos	neg	neg	16S-Mex-	MI	5	19.48	33.94	32.71	0	0	NE	117	1.24	0	0	NE	2.06819	0.1	neg	neg	Ext, Robot IDVET	27/03/2025	75	50-100 d	8	0-50 d	83	0-100 d	MAG FAST768: 034	80 µl	neat
1214-2	2	2025-01-11	2025	Winter	1	D	4	4 -5 years	45	>24months	F	21/04/2021	HF	Subclinical	15	pos	pos	pos	pos	pos	16S-Mex-CMh-Mass	TI	5	17.98	28.98	33.71	31.32	28.94	NE	5900	non-quantifiable	49.1	4910	NE	3.77085	non-quantifiable	1.69108	3.69108	Ext, Robot IDVET	27/03/2025	75	50-100 d	8	0-50 d	83	0-100 d	MAG FAST768: 034	80 µl	neat
1222-2	2	2025-01-11	2025	Winter	1	D	4	4 -5 years	45	>24months	F	05/05/2021	HF	Subclinical	15	pos	neg	neg	neg	neg	NI	NI	5	17.8	0	0	0	0	NE	0	0	0	0	NE	neg	neg	neg	neg	Ext. Robot IDVET	27/03/2025	75	50-100 d	8	0-50 d	83	0-100 d	MAG FAST768: 034	80 µl	neat
133-2	2	2025-01-11	2025	Winter	1	D	5	4 -5 years	62	>24months	F	11/12/2019	brown suiss	Subclinical	15	pos	pos	neg	pos	neg	16S-CMh-	MI	5	19.27	34.05	36.08	30.1	0	NE	294	0	153	0	NE	2.46835	neg	2.18469	neg	Ext, Robot IDVET	27/03/2025	75	50-100 d	8	0-50 d	83	0-100 d	MAG FAST768: 034	80 µl	neat
159-2	2	2025-01-11	2025	Winter	1	D	5	4 -5 years	60	>24months	F	20/02/2020	HF	Subclinical	15	pos	pos	pos	pos	pos	16S-Mex-CMh-Mass	TI	5	18.69	27.34	26.63	35.38	28.58	NE	15600	236000	non-quantifiable	6230	NE	4.19312	5.37291	non-quantifiable	3.79449	Ext, Robot IDVET	27/03/2025	75	50-100 d	8	0-50 d	83	0-100 d	MAG FAST768: 034	80 µl	neat
160-2	2	2025-01-11	2025	Winter	1	D	5	4 -5 years	60	>24months	F	04/02/2020	HF	Subclinical	15	pos	pos	pos	pos	neg	16S-Mex-CMh-	DI	5	18.52	32.5	32.95	29.88	35.3	NE	736	2.37	188	0	NE	2.86688	0.374748	2.27416	neg	Ext, Robot IDVET	27/03/2025	75	50-100 d	8	0-50 d	83	0-100 d	MAG FAST768: 034	80 µl	neat
179-2	2	2025-01-11	2025	Winter	1	D	5	4 -5 years	58	>24months	F	26/03/2020	HF	Subclinical	15	pos	pos	pos	pos	neg	16S-Mex-CMh-	DI	5	20.11	31.58	29.77	29.76	0	NE	1270	774	210	0	NE	3.1038	2.88874	2.32222	neg	Ext, Robot IDVET	27/03/2025	75	50-100 d	8	0-50 d	83	0-100 d	MAG FAST768: 034	80 µl	neat
191-2	2	2025-01-11	2025	Winter	1	D	5	4 -5 years	56	>24months	F	02/06/2020	HF	Subclinical	15	pos	pos	neg	pos	neg	16S-CMh-	MI	5	19.29	32.54	0	30.1	0	NE	719	0	153	0	NE	2.85673	neg	2.18469	neg	Ext, Robot IDVET	27/03/2025	75	50-100 d	8	0-50 d	83	0-100 d	MAG FAST768: 034	80 µl	neat
192-2	2	2025-01-11	2025	Winter	1	D	5	4 -5 years	56	>24months	F	11/06/2020	HF	Subclinical	15	pos	pos	pos	pos	neg	16S-Mex-CMh-	DI	5	21.46	33.5	27.9	27.9	0	NE	597	1450000	287	0	NE	2.77597	6.16137	2.45788	neg	Ext, Robot IDVET	27/03/2025	75	50-100 d	8	0-50 d	83	0-100 d	MAG FAST768: 034	80 µl	neat
194-2	2	2025-01-11	2025	Winter	1	D	5	4 -5 years	56	>24months	F	19/06/2020	HF	Subclinical	15	pos	pos	pos	pos	neg	16S-Mex-CMh-	DI	5	18.47	33.22	31.06	34.2	0	NE	481	73.9	non-quantifiable	0	NE	2.68215	1.86864	non-quantifiable	neg	Ext, Robot IDVET	27/03/2025	75	50-100 d	8	0-50 d	83	0-100 d	MAG FAST768: 034	80 µl	neat
2700-2	2	2025-01-11	2025	Winter	1	D	4	4 -5 years	44	>24months	F	03/06/2021	HF	Subclinical	15	pos	pos	pos	pos	neg	16S-Mex-CMh-	DI	5	21.71	33.91	33.11	30.78	0	NE	320	non-quantifiable	81.2	0	NE	2.50515	non-quantifiable	1.90956	neg	Ext, Robot IDVET	27/03/2025	75	50-100 d	8	0-50 d	83	0-100 d	MAG FAST768: 034	80 µl	neat
2717-2	2	2025-01-11	2025	Winter	1	D	3	3 years	41	>24months	F	18/08/2021	HF	Subclinical	15	pos	pos	pos	pos	neg	16S-Mex-CMh-	DI	5	17.89	28.31	28.17	27.37	0	NE	8770	14300	1940	0	NE	3.943	4.15534	3.2878	neg	Ext, Robot IDVET	27/03/2025	75	50-100 d	8	0-50 d	83	0-100 d	MAG FAST768: 034	80 µl	neat
2724-2	2	2025-01-11	2025	Winter	1	D	3	3 years	41	>24months	F	01/09/2021	HF	Subclinical	15	pos	pos	pos	pos	pos	16S-Mex-CMh-Mass	TI	5	21.59	30.62	30.01	30.01	32.12	NE	2500	13700	116	724	NE	3.39794	4.13672	2.06446	2.85974	Ext, Robot IDVET	27/03/2025	75	50-100 d	8	0-50 d	83	0-100 d	MAG FAST768: 034	80 µl	neat
2727-2	2	2025-01-11	2025	Winter	1	D	3	3 years	41	>24months	F	14/09/2021	brown suiss	Subclinical	15	pos	pos	pos	pos	neg	16S-Mex-CMh-	DI	5	18.01	36.77	35.56	34.55	0	NE	non-quantifiable	non-quantifiable	non-quantifiable	0	NE	non-quantifiable	non-quantifiable	non-quantifiable	neg	Ext. Robot IDVET	27/03/2025	75	50-100 d	8	0-50 d	83	0-100 d	MAG FAST768: 034	80 µl	neat
2737-2	2	2025-01-11	2025	Winter	1	D	3	3 years	39	>24months	F	15/10/2021	HF	Subclinical	15	pos	pos	pos	pos	neg	16S-Mex-CMh-	DI	5	18.21	27.01	26.34	28.3	0	NE	18900	399000	817	0	NE	4.27646	5.60097	2.91222	neg	Ext, Robot IDVET	27/03/2025	75	50-100 d	8	0-50 d	83	0-100 d	MAG FAST768: 034	80 µl	neat
2739-2	2	2025-01-11	2025	Winter	1	D	3	3 years	39	>24months	F	19/10/2021	HF	Subclinical	15	pos	pos	pos	pos	neg	16S-Mex-CMh-	DI	5	20.56	30.49	32.04	32.04	0	NE	2670	155	non-quantifiable	0	NE	3.42651	2.19033	non-quantifiable	neg	Ext, Robot IDVET	27/03/2025	75	50-100 d	8	0-50 d	83	0-100 d	MAG FAST768: 034	80 µl	neat
2741-2	2	2025-01-11	2025	Winter	1	D	3	3 years	39	>24months	F	19/10/2021	Salers	Subclinical	15	pos	pos	pos	pos	neg	16S-Mex-CMh-	DI	5	23.25	32.87	3.93	3.93	0	NE	816	1.39e+29	8940000	0	NE	2.91169	29.143	6.95134	neg	Ext, Robot IDVET	27/03/2025	75	50-100 d	8	0-50 d	83	0-100 d	MAG FAST768: 034	80 µl	neat
2751-2	2	2025-01-11	2025	Winter	1	D	3	3 years	39	>24months	F	10/11/2021	HF	Subclinical	15	pos	pos	pos	pos	neg	16S-Mex-CMh-	DI	5	19.42	31.7	30.3	28.82	0	NE	1180	295	503	0	NE	3.07188	2.46982	2.70157	neg	Ext, Robot IDVET	27/03/2025	75	50-100 d	8	0-50 d	83	0-100 d	MAG FAST768: 034	80 µl	neat
2755-2	2	2025-01-11	2025	Winter	1	D	3	3 years	38	>24months	F	24/11/2021	brown suiss	Subclinical	15	pos	pos	pos	pos	neg	16S-Mex-CMh-	DI	5	19	30.86	30.56	32.13	0	NE	1230	70.4	non-quantifiable	0	NE	3.08991	1.84757	non-quantifiable	neg	Ext, Robot IDVET	27/03/2025	75	50-100 d	8	0-50 d	83	0-100 d	MAG FAST768: 034	80 µl	neat
2756-2	2	2025-01-11	2025	Winter	1	D	3	3 years	38	>24months	F	24/11/2021	brown suiss	Subclinical	15	pos	pos	pos	pos	pos	16S-Mex-CMh-Mass	TI	5	17.55	29.06	29.45	26.97	29.41	NE	5630	1390	2820	3590	NE	3.75051	3.14301	3.45025	3.55509	Ext, Robot IDVET	27/03/2025	75	50-100 d	8	0-50 d	83	0-100 d	MAG FAST768: 034	80 µl	neat
2768-2	2	2025-01-11	2025	Winter	1	D	3	3 years	38	>24months	F	08/12/2021	HF	Subclinical	15	pos	pos	pos	neg	neg	16S-Mex-	MI	5	18.3	34.58	33.35	0	37.13	NE	215	non-quantifiable	0	0	NE	2.33244	non-quantifiable	neg	neg	Ext, Robot IDVET	27/03/2025	75	50-100 d	8	0-50 d	83	0-100 d	MAG FAST768: 034	80 µl	neat
2777-2	2	2025-01-11	2025	Winter	1	D	3	3 years	37	>24months	F	16/12/2021	HF	Subclinical	15	pos	pos	pos	pos	neg	16S-Mex-CMh-	DI	5	18.32	29.51	28.34	30.99	0	NE	4310	10500	66.7	0	NE	3.63448	4.02119	1.82413	neg	Ext, Robot IDVET	27/03/2025	75	50-100 d	8	0-50 d	83	0-100 d	MAG FAST768: 034	80 µl	neat
2781-2	2	2025-01-11	2025	Winter	1	D	3	3 years	37	>24months	F	02/01/2022	HF	Subclinical	15	pos	pos	neg	pos	pos	16S-CMh-Mass	DI	5	18.63	25.31	0	29.02	25.33	NE	51700	0	418	53800	NE	4.71349	neg	2.62118	4.73078	Ext, Robot IDVET	27/03/2025	75	50-100 d	8	0-50 d	83	0-100 d	MAG FAST768: 034	80 µl	neat
2788-2	2	2025-01-11	2025	Winter	1	D	3	3 years	37	>24months	F	09/01/2022	HF	Subclinical	15	pos	pos	pos	pos	neg	16S-Mex-CMh-	DI	5	21.68	33.31	27.76	27.76	0	NE	656	1970000	305	0	NE	2.8169	6.29447	2.4843	neg	Ext, Robot IDVET	27/03/2025	75	50-100 d	8	0-50 d	83	0-100 d	MAG FAST768: 034	80 µl	neat
2793-2	2	2025-01-11	2025	Winter	1	D	3	3 years	36	>24months	F	18/01/2022	HF	Subclinical	15	pos	pos	pos	pos	neg	16S-Mex-CMh-	DI	5	21.13	30.36	31.99	26.45	0	NE	1800	4.78	1340	0	NE	3.25527	0.679428	3.1271	neg	Ext, Robot IDVET	27/03/2025	75	50-100 d	8	0-50 d	83	0-100 d	MAG FAST768: 034	80 µl	neat
2795-2	2	2025-01-11	2025	Winter	1	D	3	3 years	36	>24months	F	22/01/2022	HF	Subclinical	15	pos	pos	pos	pos	neg	16S-Mex-CMh-	DI	5	18.19	27.57	26.58	27.44	0	NE	13600	258000	1820	0	NE	4.13354	5.41162	3.26007	neg	Ext, Robot IDVET	27/03/2025	75	50-100 d	8	0-50 d	83	0-100 d	MAG FAST768: 034	80 µl	neat
2802-2	2	2025-01-11	2025	Winter	1	D	3	3 years	35	>24months	F	13/02/2022	HF	Subclinical	15	pos	pos	pos	pos	neg	16S-Mex-CMh-	DI	5	20.07	32.08	34.07	28.87	0	NE	483	non-quantifiable	155	0	NE	2.68395	non-quantifiable	2.19033	neg	Ext, Robot IDVET	27/03/2025	75	50-100 d	8	0-50 d	83	0-100 d	MAG FAST768: 034	80 µl	neat
2812-2	2	2025-01-11	2025	Winter	1	D	3	3 years	34	>24months	F	26/03/2022	HF	Subclinical	15	pos	pos	pos	pos	pos	16S-Mex-CMh-Mass	TI	5	17.94	29.18	27.96	31.81	34.87	NE	5240	20900	31.1	non-quantifiable	NE	3.71933	4.32015	1.49276	non-quantifiable	Ext, Robot IDVET	27/03/2025	75	50-100 d	8	0-50 d	83	0-100 d	MAG FAST768: 034	80 µl	neat
2814-2	2	2025-01-11	2025	Winter	1	D	3	3 years	34	>24months	F	28/03/2022	HF	Subclinical	15	pos	pos	pos	pos	neg	16S-Mex-CMh-	DI	5	18.39	27.66	27.02	34.14	0	NE	12900	116000	non-quantifiable	0	NE	4.11059	5.06446	non-quantifiable	neg	Ext, Robot IDVET	27/03/2025	75	50-100 d	8	0-50 d	83	0-100 d	MAG FAST768: 034	80 µl	neat
2821-2	2	2025-01-11	2025	Winter	1	D	3	3 years	33	>24months	F	19/04/2022	HF	Subclinical	15	pos	pos	neg	pos	pos	16S-CMh-Mass	DI	5	18.83	30.4	0	28.41	31.36	NE	2550	0	737	985	NE	3.40654	neg	2.86747	2.99344	Ext, Robot IDVET	27/03/2025	75	50-100 d	8	0-50 d	83	0-100 d	MAG FAST768: 034	80 µl	neat
2822-2	2	2025-01-11	2025	Winter	1	D	3	3 years	33	>24months	F	06/05/2022	HF	Subclinical	15	pos	pos	pos	pos	neg	16S-Mex-CMh-	DI	5	19.44	28.8	27.73	28.72	0	NE	5900	14400	177	0	NE	3.77085	4.15836	2.24797	neg	Ext, Robot IDVET	27/03/2025	75	50-100 d	8	0-50 d	83	0-100 d	MAG FAST768: 034	80 µl	neat
2823-2	2	2025-01-11	2025	Winter	1	D	3	3 years	33	>24months	F	07/05/2022	HF	Subclinical	15	pos	pos	pos	pos	neg	16S-Mex-CMh-	DI	5	20.4	34.83	30.3	27.8	36.95	NE	59.2	115	402	0	NE	1.77232	2.0607	2.60423	neg	Ext, Robot IDVET	27/03/2025	75	50-100 d	8	0-50 d	83	0-100 d	MAG FAST768: 034	80 µl	neat
2826-2	2	2025-01-11	2025	Winter	1	D	3	3 years	32	>24months	F	18/05/2022	HF	Subclinical	15	pos	pos	neg	pos	neg	16S-CMh-	MI	5	19.04	31.65	0	28.17	0	NE	671	0	289	0	NE	2.82672	neg	2.4609	neg	Ext, Robot IDVET	27/03/2025	75	50-100 d	8	0-50 d	83	0-100 d	MAG FAST768: 034	80 µl	neat
3616-2	2	2025-01-11	2025	Winter	1	D	8	> 5 years	100	>24months	F	11/10/2016	HF	Subclinical	15	pos	pos	neg	neg	neg	16S-	unknown	5	21.57	35.91	37.16	37.16	35.41	NE	non-quantifiable	0	0	0	NE	non-quantifiable	neg	neg	neg	Ext. Robot IDVET	27/03/2025	75	50-100 d	8	0-50 d	83	0-100 d	MAG FAST768: 034	80 µl	neat
3840-2	2	2025-01-11	2025	Winter	1	D	3	3 years	30	>24months	F	12/07/2022	HF	Subclinical	15	pos	pos	pos	pos	neg	16S-Mex-CMh-	DI	5	18.98	21.64	21.22	30.37	0	NE	1390000	2980000000	40.8	0	NE	6.14301	9.47422	1.61066	neg	Ext, Robot IDVET	27/03/2025	75	50-100 d	8	0-50 d	83	0-100 d	MAG FAST768: 034	80 µl	neat
3845-2	2	2025-01-11	2025	Winter	1	D	2	2 years	30	>24months	F	31/07/2022	HF	Subclinical	15	pos	pos	pos	pos	neg	16S-Mex-CMh-	DI	5	19.33	32.77	32.49	30.34	0	NE	285	1.87	41.9	0	NE	2.45484	0.271842	1.62221	neg	Ext, Robot IDVET	27/03/2025	75	50-100 d	8	0-50 d	83	0-100 d	MAG FAST768: 034	80 µl	neat
3853-2	2	2025-01-11	2025	Winter	1	D	2	2 years	29	>24months	F	23/08/2022	HF	Subclinical	15	pos	pos	pos	pos	neg	16S-Mex-CMh-	DI	5	17.98	30.15	30.26	27.15	0	NE	2950	317	2380	0	NE	3.46982	2.50106	3.37658	neg	Ext, Robot IDVET	27/03/2025	75	50-100 d	8	0-50 d	83	0-100 d	MAG FAST768: 034	80 µl	neat
3855-2	2	2025-01-11	2025	Winter	1	D	2	2 years	29	>24months	F	24/08/2022	HF	Subclinical	15	pos	pos	pos	pos	neg	16S-Mex-CMh-	DI	5	19.44	30.87	30.47	26.04	37.12	NE	1930	217	6700	0	NE	3.28556	2.33646	3.82607	neg	Ext, Robot IDVET	27/03/2025	75	50-100 d	8	0-50 d	83	0-100 d	MAG FAST768: 034	80 µl	neat
3860-2	2	2025-01-11	2025	Winter	1	D	2	2 years	29	>24months	F	04/09/2022	brown suiss	Subclinical	15	pos	pos	pos	pos	neg	16S-Mex-CMh-	DI	5	18.94	25.55	24.63	28.31	0	NE	70500	4900000	255	0	NE	4.84819	6.6902	2.40654	neg	Ext, Robot IDVET	27/03/2025	75	50-100 d	8	0-50 d	83	0-100 d	MAG FAST768: 034	80 µl	neat
3861-2	2	2025-01-11	2025	Winter	1	D	2	2 years	29	>24months	F	09/09/2022	HF	Subclinical	15	pos	pos	neg	pos	neg	16S-CMh-	MI	5	19.75	37.2	0	33.86	0	NE	non-quantifiable	0	non-quantifiable	0	NE	non-quantifiable	neg	non-quantifiable	neg	Ext. Robot IDVET	27/03/2025	75	50-100 d	8	0-50 d	83	0-100 d	MAG FAST768: 034	80 µl	neat
3863-2	2	2025-01-11	2025	Winter	1	D	2	2 years	28	>24months	F	12/09/2022	HF	Subclinical	15	pos	pos	neg	pos	pos	16S-CMh-Mass	DI	5	18.64	30.42	0	30.14	31.33	NE	1710	0	50.1	1680	NE	3.233	neg	1.69984	3.22531	Ext, Robot IDVET	27/03/2025	75	50-100 d	8	0-50 d	83	0-100 d	MAG FAST768: 034	80 µl	neat
3870-2	2	2025-01-11	2025	Winter	1	D	2	2 years	28	>24months	F	20/09/2022	HF	Subclinical	15	pos	pos	pos	neg	neg	16S-Mex-	MI	5	18.61	28.56	27.33	36.17	0	NE	7560	65800	0	0	NE	3.87852	4.81823	neg	neg	Ext, Robot IDVET	27/03/2025	75	50-100 d	8	0-50 d	83	0-100 d	MAG FAST768: 034	80 µl	neat
3888-2	2	2025-01-11	2025	Winter	1	D	2	2 years	27	>24months	F	20/10/2022	HF	Subclinical	15	pos	pos	pos	pos	neg	16S-Mex-CMh-	DI	5	20.03	31.95	30.89	30.89	0	NE	1290	1970	79	0	NE	3.11059	3.29447	1.89763	neg	Ext, Robot IDVET	27/03/2025	75	50-100 d	8	0-50 d	83	0-100 d	MAG FAST768: 034	80 µl	neat
3889-2	2	2025-01-11	2025	Winter	1	D	2	2 years	27	>24months	F	21/10/2022	HF	Subclinical	15	pos	pos	neg	pos	neg	16S-CMh-	MI	5	19.26	30.37	0	27.35	0	NE	1780	0	600	0	NE	3.25042	neg	2.77815	neg	Ext, Robot IDVET	27/03/2025	75	50-100 d	8	0-50 d	83	0-100 d	MAG FAST768: 034	80 µl	neat
3898-2	2	2025-01-11	2025	Winter	1	D	2	2 years	26	>24months	F	18/11/2022	HF	Subclinical	15	pos	pos	pos	pos	neg	16S-Mex-CMh-	DI	5	19.88	31.06	32.39	27.84	0	NE	1050	2.25	388	0	NE	3.02119	0.352183	2.58883	neg	Ext, Robot IDVET	27/03/2025	75	50-100 d	8	0-50 d	83	0-100 d	MAG FAST768: 034	80 µl	neat
3899-2	2	2025-01-11	2025	Winter	1	D	2	2 years	26	>24months	F	19/11/2022	HF	Subclinical	15	pos	pos	pos	pos	neg	16S-Mex-CMh-	DI	5	18.46	31.37	29.42	33.54	0	NE	1440	1470	non-quantifiable	0	NE	3.15836	3.16732	non-quantifiable	neg	Ext, Robot IDVET	27/03/2025	75	50-100 d	8	0-50 d	83	0-100 d	MAG FAST768: 034	80 µl	neat
3901-2	2	2025-01-11	2025	Winter	1	D	2	2 years	26	>24months	F	22/11/2022	HF	Subclinical	15	pos	neg	neg	neg	neg	NI	NI	5	19.24	38.24	0	0	0	NE	0	0	0	0	NE	neg	neg	neg	neg	Ext. Robot IDVET	27/03/2025	75	50-100 d	8	0-50 d	83	0-100 d	MAG FAST768: 034	80 µl	neat
3914-2	2	2025-01-11	2025	Winter	1	D	2	2 years	25	>24months	F	21/12/2022	HF	Subclinical	15	pos	pos	pos	pos	pos	16S-Mex-CMh-Mass	TI	5	18.57	29.4	31.55	27.2	29.76	NE	4600	30.3	2270	2850	NE	3.66276	1.48144	3.35603	3.45484	Ext, Robot IDVET	27/03/2025	75	50-100 d	8	0-50 d	83	0-100 d	MAG FAST768: 034	80 µl	neat
3922-2	2	2025-01-11	2025	Winter	1	D	2	2 years	25	>24months	F	03/01/2023	HF	Subclinical	15	pos	pos	pos	pos	neg	16S-Mex-CMh-	DI	5	20.12	32.07	29.82	29.82	0	NE	1220	20900	125	0	NE	3.08636	4.32015	2.09691	neg	Ext, Robot IDVET	27/03/2025	75	50-100 d	8	0-50 d	83	0-100 d	MAG FAST768: 034	80 µl	neat
3923-2	2	2025-01-11	2025	Winter	1	D	2	2 years	25	>24months	F	03/01/2023	HF	Subclinical	15	pos	pos	pos	pos	neg	16S-Mex-CMh-	DI	5	20.92	29.64	28.78	28.78	35.77	NE	4070	207000	196	0	NE	3.60959	5.31597	2.29226	neg	Ext, Robot IDVET	27/03/2025	75	50-100 d	8	0-50 d	83	0-100 d	MAG FAST768: 034	80 µl	neat
3927-2	2	2025-01-11	2025	Winter	1	D	2	2 years	24	18 months-24 months	F	11/01/2023	HF	Subclinical	15	pos	pos	pos	pos	pos	16S-Mex-CMh-Mass	TI	5	21.39	30.5	26.51	26.51	29.64	NE	2660	31100000	523	3720	NE	3.42488	7.49276	2.7185	3.57054	Ext, Robot IDVET	27/03/2025	75	50-100 d	8	0-50 d	83	0-100 d	MAG FAST768: 034	80 µl	neat
3929-2	2	2025-01-11	2025	Winter	1	D	2	2 years	24	18 months-24 months	F	16/01/2023	HF	Subclinical	15	pos	pos	pos	pos	neg	16S-Mex-CMh-	DI	5	21.79	36.66	34.97	34.97	0	NE	non-quantifiable	non-quantifiable	non-quantifiable	0	NE	non-quantifiable	non-quantifiable	non-quantifiable	neg	Ext. Robot IDVET	27/03/2025	75	50-100 d	8	0-50 d	83	0-100 d	MAG FAST768: 034	80 µl	neat
3933-2	2	2025-01-11	2025	Winter	1	D	2	2 years	24	18 months-24 months	F	23/01/2023	HF	Subclinical	15	pos	pos	pos	pos	neg	16S-Mex-CMh-	DI	5	21.51	28.53	28.65	28.65	35.8	NE	7080	276000	208	0	NE	3.85003	5.44091	2.31806	neg	Ext, Robot IDVET	27/03/2025	75	50-100 d	8	0-50 d	83	0-100 d	MAG FAST768: 034	80 µl	neat
3943-2	2	2025-01-11	2025	Winter	1	D	2	2 years	23	18 months-24 months	F	17/02/2023	HF	Subclinical	15	pos	pos	pos	pos	neg	16S-Mex-CMh-	DI	5	24.22	34.99	27.97	27.97	0	NE	284	1240000	279	0	NE	2.45332	6.09342	2.4456	neg	Ext, Robot IDVET	27/03/2025	75	50-100 d	8	0-50 d	83	0-100 d	MAG FAST768: 034	80 µl	neat
3946-2	2	2025-01-11	2025	Winter	1	D	2	2 years	23	18 months-24 months	F	24/02/2023	HF	Subclinical	15	pos	pos	pos	pos	pos	16S-Mex-CMh-Mass	TI	5	21.23	26.93	29.59	29.59	27.02	NE	15700	34700	138	20900	NE	4.1959	4.54033	2.13988	4.32015	Ext, Robot IDVET	27/03/2025	75	50-100 d	8	0-50 d	83	0-100 d	MAG FAST768: 034	80 µl	neat
3950-2	2	2025-01-11	2025	Winter	1	D	2	2 years	22	18 months-24 months	F	11/03/2023	HF	Subclinical	15	pos	pos	pos	pos	neg	16S-Mex-CMh-	DI	5	20.62	24.18	23.09	30.68	0	NE	101000	148000000	89.1	0	NE	5.00432	8.17026	1.94988	neg	Ext, Robot IDVET	27/03/2025	75	50-100 d	8	0-50 d	83	0-100 d	MAG FAST768: 034	80 µl	neat
3952-2	2	2025-01-11	2025	Winter	1	D	2	2 years	22	18 months-24 months	F	19/03/2023	HF	Subclinical	15	pos	pos	pos	pos	neg	16S-Mex-CMh-	DI	5	20.53	27.08	25.9	25.9	0	NE	14600	120000000	681	0	NE	4.16435	8.07918	2.83315	neg	Ext, Robot IDVET	27/03/2025	75	50-100 d	8	0-50 d	83	0-100 d	MAG FAST768: 034	80 µl	neat
3961-2	2	2025-01-11	2025	Winter	1	D	2	2 years	21	18 months-24 months	F	08/04/2023	brown suiss	Subclinical	15	pos	pos	pos	pos	pos	16S-Mex-CMh-Mass	TI	5	20.97	29.08	28.62	28.62	31.62	NE	5380	295000	210	1010	NE	3.73078	5.46982	2.32222	3.00432	Ext, Robot IDVET	27/03/2025	75	50-100 d	8	0-50 d	83	0-100 d	MAG FAST768: 034	80 µl	neat
3967-2	2	2025-01-11	2025	Winter	1	D	2	2 years	20	18 months-24 months	F	10/05/2023	HF	Subclinical	15	pos	pos	pos	pos	pos	16S-Mex-CMh-Mass	TI	5	20.86	28.38	32.09	32.09	34.3	NE	7630	139	non-quantifiable	non-quantifiable	NE	3.88252	2.14301	non-quantifiable	non-quantifiable	Ext, Robot IDVET	27/03/2025	75	50-100 d	8	0-50 d	83	0-100 d	MAG FAST768: 034	80 µl	neat
3970-2	2	2025-01-11	2025	Winter	1	D	2	2 years	20	18 months-24 months	F	16/05/2023	HF	Subclinical	15	pos	pos	pos	pos	pos	16S-Mex-CMh-Mass	TI	5	21.45	26.65	29.55	29.55	27.79	NE	18000	37900	141	12600	NE	4.25527	4.57864	2.14922	4.10037	Ext, Robot IDVET	27/03/2025	75	50-100 d	8	0-50 d	83	0-100 d	MAG FAST768: 034	80 µl	neat
3973-2	2	2025-01-11	2025	Winter	1	D	2	2 years	20	18 months-24 months	F	25/05/2023	HF	Subclinical	15	pos	pos	pos	pos	pos	16S-Mex-CMh-Mass	TI	5	21.83	25.28	28.79	28.79	26.02	NE	35700	203000	196	40500	NE	4.55267	5.3075	2.29226	4.60746	Ext, Robot IDVET	27/03/2025	75	50-100 d	8	0-50 d	83	0-100 d	MAG FAST768: 034	80 µl	neat
3974-2	2	2025-01-11	2025	Winter	1	D	2	2 years	20	18 months-24 months	F	26/05/2023	HF	Subclinical	15	pos	pos	pos	pos	neg	16S-Mex-CMh-	DI	5	22.17	30.33	26.96	26.96	0	NE	2890	11500000	431	0	NE	3.4609	7.0607	2.63448	neg	Ext, Robot IDVET	27/03/2025	75	50-100 d	8	0-50 d	83	0-100 d	MAG FAST768: 034	80 µl	neat
3975-2	2	2025-01-11	2025	Winter	1	D	2	2 years	20	18 months-24 months	F	28/05/2023	HF	Subclinical	15	pos	pos	pos	pos	pos	16S-Mex-CMh-Mass	TI	5	20.7	30.52	29.74	29.74	34.12	NE	2630	24900	130	non-quantifiable	NE	3.41996	4.3962	2.11394	non-quantifiable	Ext, Robot IDVET	27/03/2025	75	50-100 d	8	0-50 d	83	0-100 d	MAG FAST768: 034	80 µl	neat
4164-2	2	2025-01-11	2025	Winter	1	D	7	> 5 years	88	>24months	F	16/10/2017	HF	Subclinical	15	pos	pos	pos	pos	neg	16S-Mex-CMh-	DI	5	19.65	32.1	34.6	27.84	0	NE	932	non-quantifiable	1250	0	NE	2.96942	non-quantifiable	3.09691	neg	Ext, Robot IDVET	27/03/2025	75	50-100 d	8	0-50 d	83	0-100 d	MAG FAST768: 034	80 µl	neat
4166-2	2	2025-01-11	2025	Winter	1	D	7	> 5 years	88	>24months	F	22/10/2017	HF	Subclinical	15	pos	pos	pos	pos	neg	16S-Mex-CMh-	DI	5	18.59	35.09	35.62	33.93	0	NE	non-quantifiable	non-quantifiable	non-quantifiable	0	NE	non-quantifiable	non-quantifiable	non-quantifiable	neg	Ext. Robot IDVET	27/03/2025	75	50-100 d	8	0-50 d	83	0-100 d	MAG FAST768: 034	80 µl	neat
4186-2	2	2025-01-11	2025	Winter	1	D	7	> 5 years	87	>24months	F	02/12/2017	HF	Subclinical	15	pos	neg	neg	neg	neg	NI	NI	5	18.75	0	0	0	0	NE	0	0	0	0	NE	neg	neg	neg	neg	Ext. Robot IDVET	27/03/2025	75	50-100 d	8	0-50 d	83	0-100 d	MAG FAST768: 034	80 µl	neat
4221-2	2	2025-01-11	2025	Winter	1	D	7	> 5 years	85	>24months	F	02/02/2018	HF	Subclinical	15	pos	pos	pos	pos	neg	16S-Mex-CMh-	DI	5	19.03	31.93	30.25	30.17	0	NE	1030	323	143	0	NE	3.01284	2.5092	2.15534	neg	Ext, Robot IDVET	27/03/2025	75	50-100 d	8	0-50 d	83	0-100 d	MAG FAST768: 034	80 µl	neat
4229-2	2	2025-01-11	2025	Winter	1	D	7	> 5 years	84	>24months	F	03/03/2018	HF	Subclinical	15	pos	neg	neg	neg	neg	NI	NI	5	18.81	39.08	0	0	0	NE	0	0	0	0	NE	neg	neg	neg	neg	Ext. Robot IDVET	27/03/2025	75	50-100 d	8	0-50 d	83	0-100 d	MAG FAST768: 034	80 µl	neat
4246-2	2	2025-01-11	2025	Winter	1	D	7	> 5 years	80	>24months	F	26/06/2018	HF	Subclinical	15	pos	pos	pos	pos	neg	16S-Mex-CMh-	DI	5	19.23	34.95	32.42	34.63	0	NE	173	6.21	non-quantifiable	0	NE	2.23805	0.793092	non-quantifiable	neg	Ext, Robot IDVET	27/03/2025	75	50-100 d	8	0-50 d	83	0-100 d	MAG FAST768: 034	80 µl	neat
4811-2	2	2025-01-11	2025	Winter	1	D	2	2 years	20	18 months-24 months	F	28/05/2023	HF	Subclinical	15	pos	pos	pos	pos	pos	16S-Mex-CMh-Mass	TI	5	21.08	24.73	26.9	26.9	25.14	NE	46900	13200000	442	72400	NE	4.67117	7.12057	2.64542	4.85974	Ext, Robot IDVET	27/03/2025	75	50-100 d	8	0-50 d	83	0-100 d	MAG FAST768: 034	80 µl	neat
4818-2	2	2025-01-11	2025	Winter	1	D	2	2 years	19	18 months-24 months	F	16/06/2023	HF	Subclinical	15	pos	pos	pos	pos	neg	16S-Mex-CMh-	DI	5	21.58	30.47	26.89	26.89	0	NE	2700	13400000	444	0	NE	3.43136	7.1271	2.64738	neg	Ext, Robot IDVET	27/03/2025	75	50-100 d	8	0-50 d	83	0-100 d	MAG FAST768: 034	80 µl	neat
4822-2	2	2025-01-11	2025	Winter	1	D	2	2 years	18	12-18 months	F	10/07/2023	HF	Subclinical	15	pos	pos	pos	pos	pos	16S-Mex-CMh-Mass	TI	5	20.33	29.08	26.89	26.89	32.22	NE	5380	13400000	444	678	NE	3.73078	7.1271	2.64738	2.83123	Ext, Robot IDVET	27/03/2025	75	50-100 d	8	0-50 d	83	0-100 d	MAG FAST768: 034	80 µl	neat
4828-2	2	2025-01-11	2025	Winter	1	D	1	0 -1 year	18	12-18 months	F	02/08/2023	HF	Subclinical	15	pos	pos	pos	pos	pos	16S-Mex-CMh-Mass	TI	5	22.59	28.61	27.87	27.01	32.24	NE	7340	24600	2710	550	NE	3.8657	4.39094	3.43297	2.74036	Ext, Robot IDVET	27/03/2025	75	50-100 d	8	0-50 d	83	0-100 d	MAG FAST768: 034	80 µl	neat
4833-2	2	2025-01-11	2025	Winter	1	D	1	0 -1 year	17	12-18 months	F	15/08/2023	HF	Subclinical	15	pos	neg	neg	neg	neg	NI	NI	5	21.91	0	0	0	0	NE	0	0	0	0	NE	neg	neg	neg	neg	Ext. Robot IDVET	27/03/2025	75	50-100 d	8	0-50 d	83	0-100 d	MAG FAST768: 034	80 µl	neat
4839-2	2	2025-01-11	2025	Winter	1	D	1	0 -1 year	16	12-18 months	F	05/09/2023	HF	Subclinical	15	pos	pos	pos	pos	pos	16S-Mex-CMh-Mass	TI	5	18.54	27.81	27.87	25.59	32.65	NE	11800	24600	10200	419	NE	4.07188	4.39094	4.0086	2.62221	Ext, Robot IDVET	27/03/2025	75	50-100 d	8	0-50 d	83	0-100 d	MAG FAST768: 034	80 µl	neat
4846-2	2	2025-01-11	2025	Winter	1	D	1	0 -1 year	16	12-18 months	F	18/09/2023	HF	Subclinical	15	pos	pos	pos	pos	pos	16S-Mex-CMh-Mass	TI	5	18.03	28.47	29.09	26.91	30.69	NE	7980	2670	2980	1540	NE	3.902	3.42651	3.47422	3.18752	Ext, Robot IDVET	27/03/2025	75	50-100 d	8	0-50 d	83	0-100 d	MAG FAST768: 034	80 µl	neat
4859-2	2	2025-01-11	2025	Winter	1	D	1	0 -1 year	15	12-18 months	F	08/10/2023	HF	Subclinical	15	pos	pos	pos	pos	neg	16S-Mex-CMh-	DI	5	18.78	27.63	25.28	26.43	0	NE	13100	2750000	4660	0	NE	4.11727	6.43933	3.66839	neg	Ext, Robot IDVET	27/03/2025	75	50-100 d	8	0-50 d	83	0-100 d	MAG FAST768: 034	80 µl	neat
4860-2	2	2025-01-11	2025	Winter	1	D	1	0 -1 year	15	12-18 months	F	11/10/2023	HF	Subclinical	15	pos	pos	pos	pos	neg	16S-Mex-CMh-	DI	5	18.16	27.77	29.38	25.26	0	NE	12100	1580	13800	0	NE	4.08279	3.19866	4.13988	neg	Ext, Robot IDVET	27/03/2025	75	50-100 d	8	0-50 d	83	0-100 d	MAG FAST768: 034	80 µl	neat
4866-2	2	2025-01-11	2025	Winter	1	D	1	0 -1 year	15	12-18 months	F	19/10/2023	brown suiss	Subclinical	15	pos	pos	pos	pos	neg	16S-Mex-CMh-	DI	5	18.33	30.13	29.71	27.71	0	NE	2990	864	1410	0	NE	3.47567	2.93651	3.14922	neg	Ext, Robot IDVET	27/03/2025	75	50-100 d	8	0-50 d	83	0-100 d	MAG FAST768: 034	80 µl	neat
4868-2	2	2025-01-11	2025	Winter	1	D	1	0 -1 year	15	12-18 months	F	23/10/2023	HF	Subclinical	15	pos	pos	pos	pos	pos	16S-Mex-CMh-Mass	TI	5	20.64	28.72	26.25	26.25	29.28	NE	6440	55200000	585	4710	NE	3.80889	7.74194	2.76716	3.67302	Ext, Robot IDVET	27/03/2025	75	50-100 d	8	0-50 d	83	0-100 d	MAG FAST768: 034	80 µl	neat
4870-2	2	2025-01-11	2025	Winter	1	D	1	0 -1 year	15	12-18 months	F	28/10/2023	HF	Subclinical	15	pos	pos	pos	pos	neg	16S-Mex-CMh-	DI	5	17.83	28.44	27.93	26.62	0	NE	8120	22100	3900	0	NE	3.90956	4.34439	3.59106	neg	Ext, Robot IDVET	27/03/2025	75	50-100 d	8	0-50 d	83	0-100 d	MAG FAST768: 034	80 µl	neat
4881-2	2	2025-01-11	2025	Winter	1	D	1	0 -1 year	14	12-18 months	F	21/11/2023	HF	Subclinical	15	pos	pos	pos	pos	pos	16S-Mex-CMh-Mass	TI	5	21.73	29.69	25.93	25.93	31.82	NE	3970	112000000	672	882	NE	3.59879	8.04922	2.82737	2.94547	Ext, Robot IDVET	27/03/2025	75	50-100 d	8	0-50 d	83	0-100 d	MAG FAST768: 034	80 µl	neat
4894-2	2	2025-01-11	2025	Winter	1	D	1	0 -1 year	13	12-18 months	F	15/12/2023	HF	Subclinical	15	pos	pos	pos	pos	neg	16S-Mex-CMh-	DI	5	19.03	27.59	26.13	32.31	0	NE	13400	585000	non-quantifiable	0	NE	4.1271	5.76716	non-quantifiable	neg	Ext, Robot IDVET	27/03/2025	75	50-100 d	8	0-50 d	83	0-100 d	MAG FAST768: 034	80 µl	neat
4895-2	2	2025-01-11	2025	Winter	1	D	1	0 -1 year	13	12-18 months	F	15/12/2023	HF	Subclinical	15	pos	pos	pos	pos	pos	16S-Mex-CMh-Mass	TI	5	17.55	25.52	24.73	28.38	27.28	NE	45600	7490000	758	14800	NE	4.65896	6.87448	2.87967	4.17026	Ext, Robot IDVET	27/03/2025	75	50-100 d	8	0-50 d	83	0-100 d	MAG FAST768: 034	80 µl	neat
4907-2	2	2025-01-11	2025	Winter	1	D	1	0 -1 year	13	12-18 months	F	01/01/2024	HF	Subclinical	15	pos	pos	pos	pos	pos	16S-Mex-CMh-Mass	TI	5	18.51	28.26	27.84	26.75	31.35	NE	9030	26000	3460	992	NE	3.95569	4.41497	3.53908	2.99651	Ext, Robot IDVET	27/03/2025	75	50-100 d	8	0-50 d	83	0-100 d	MAG FAST768: 034	80 µl	neat
4909-2	2	2025-01-11	2025	Winter	1	D	1	0 -1 year	12	6-12 months	F	03/01/2024	HF	Subclinical	15	pos	pos	pos	pos	pos	16S-Mex-CMh-Mass	TI	5	19.02	26.22	26.66	27.26	26.08	NE	30200	223000	2150	32700	NE	4.48001	5.3483	3.33244	4.51455	Ext, Robot IDVET	27/03/2025	75	50-100 d	8	0-50 d	83	0-100 d	MAG FAST768: 034	80 µl	neat
4913-2	2	2025-01-11	2025	Winter	1	D	1	0 -1 year	12	6-12 months	F	10/01/2024	HF	Subclinical	15	pos	pos	pos	pos	neg	16S-Mex-CMh-	DI	5	17.59	22.51	21.5	28.43	0	NE	271000	2680000000	724	0	NE	5.43297	9.42813	2.85974	neg	Ext, Robot IDVET	27/03/2025	75	50-100 d	8	0-50 d	83	0-100 d	MAG FAST768: 034	80 µl	neat
4916-2	2	2025-01-11	2025	Winter	1	D	1	0 -1 year	12	6-12 months	F	27/01/2024	HF	Subclinical	15	pos	pos	pos	pos	neg	16S-Mex-CMh-	DI	5	21.74	29.97	30.04	27.41	0	NE	3290	474	1870	0	NE	3.5172	2.67578	3.27184	neg	Ext, Robot IDVET	27/03/2025	75	50-100 d	8	0-50 d	83	0-100 d	MAG FAST768: 034	80 µl	neat
4917-2	2	2025-01-11	2025	Winter	1	D	1	0 -1 year	12	6-12 months	F	27/01/2024	HF	Subclinical	15	pos	pos	pos	pos	neg	16S-Mex-CMh-	DI	5	17.31	28.19	26.83	32.33	0	NE	9410	164000	non-quantifiable	0	NE	3.97359	5.21484	non-quantifiable	neg	Ext, Robot IDVET	27/03/2025	75	50-100 d	8	0-50 d	83	0-100 d	MAG FAST768: 034	80 µl	neat
4918-2	2	2025-01-11	2025	Winter	1	D	1	0 -1 year	12	6-12 months	F	28/01/2024	brown suiss	Subclinical	15	pos	pos	neg	pos	neg	16S-CMh-	MI	5	18.33	35.17	0	31.9	0	NE	non-quantifiable	0	28.6	0	NE	non-quantifiable	neg	1.4563660331290431	neg	Ext. Robot IDVET	27/03/2025	75	50-100 d	8	0-50 d	83	0-100 d	MAG FAST768: 034	80 µl	neat
4919-2	2	2025-01-11	2025	Winter	1	D	1	0 -1 year	12	6-12 months	F	29/01/2024	HF	Subclinical	15	pos	pos	pos	pos	neg	16S-Mex-CMh-	DI	5	18	27.62	32.65	24.3	0	NE	13200	4.09	33800	0	NE	4.12057	0.611723	4.52892	neg	Ext, Robot IDVET	27/03/2025	75	50-100 d	8	0-50 d	83	0-100 d	MAG FAST768: 034	80 µl	neat
4920-2	2	2025-01-11	2025	Winter	1	D	1	0 -1 year	12	6-12 months	F	29/01/2024	HF	Subclinical	15	pos	pos	pos	pos	pos	16S-Mex-CMh-Mass	TI	5	17.56	29.08	30.5	27.91	29.73	NE	5560	205	1170	2910	NE	3.74507	2.31175	3.06819	3.46389	Ext, Robot IDVET	27/03/2025	75	50-100 d	8	0-50 d	83	0-100 d	MAG FAST768: 034	80 µl	neat
4921-2	2	2025-01-11	2025	Winter	1	D	1	0 -1 year	12	6-12 months	F	30/01/2024	HF	Subclinical	15	pos	pos	pos	pos	pos	16S-Mex-CMh-Mass	TI	5	18.44	29	33.99	26.17	33.54	NE	5830	non-quantifiable	5930	non-quantifiable	NE	3.76567	non-quantifiable	3.77305	non-quantifiable	Ext, Robot IDVET	27/03/2025	75	50-100 d	8	0-50 d	83	0-100 d	MAG FAST768: 034	80 µl	neat
4927-2	2	2025-01-11	2025	Winter	1	D	1	0 -1 year	11	6-12 months	F	14/02/2024	HF	Subclinical	15	pos	pos	neg	pos	neg	16S-CMh-	MI	5	17.64	27.24	0	24.26	37.37	NE	16500	0	35100	0	NE	4.21748	neg	4.54531	neg	Ext, Robot IDVET	27/03/2025	75	50-100 d	8	0-50 d	83	0-100 d	MAG FAST768: 034	80 µl	neat
5211-2	2	2025-01-11	2025	Winter	1	D	5	4 -5 years	61	>24months	F	05/01/2020	HF	Subclinical	15	pos	pos	pos	pos	neg	16S-Mex-CMh-	DI	5	18.53	28.87	29.72	26.06	0	NE	6300	848	6570	0	NE	3.79934	2.9284	3.81757	neg	Ext, Robot IDVET	27/03/2025	75	50-100 d	8	0-50 d	83	0-100 d	MAG FAST768: 034	80 µl	neat
5567-2	2	2025-01-11	2025	Winter	1	D	8	> 5 years	103	>24months	F	02/08/2016	Salers	Subclinical	15	pos	pos	pos	pos	neg	16S-Mex-CMh-	DI	5	21.7	30.1	26.09	26.09	0	NE	3193	78600000	627	0	NE	3.5042	7.89542	2.79727	neg	Ext, Robot IDVET	27/03/2025	75	50-100 d	8	0-50 d	83	0-100 d	MAG FAST768: 034	80 µl	neat
5578-2	2	2025-01-11	2025	Winter	1	D	8	> 5 years	102	>24months	F	12/08/2016	Salers	Subclinical	15	pos	pos	pos	pos	neg	16S-Mex-CMh-	DI	5	20.32	35.77	35.4	35.4	0	NE	non-quantifiable	non-quantifiable	non-quantifiable	0	NE	non-quantifiable	non-quantifiable	non-quantifiable	neg	Ext. Robot IDVET	27/03/2025	75	50-100 d	8	0-50 d	83	0-100 d	MAG FAST768: 034	80 µl	neat
5627-2	2	2025-01-11	2025	Winter	1	D	8	> 5 years	101	>24months	F	29/09/2016	Salers	Subclinical	15	pos	neg	neg	neg	neg	NI	NI	5	22.65	0	0	0	0	NE	0	0	0	0	NE	neg	neg	neg	neg	Ext. Robot IDVET	27/03/2025	75	50-100 d	8	0-50 d	83	0-100 d	MAG FAST768: 034	80 µl	neat
5964-2	2	2025-01-11	2025	Winter	1	D	9	> 5 years	112	>24months	F	05/11/2015	brown suiss	Subclinical	15	pos	pos	pos	pos	neg	16S-Mex-CMh-	DI	5	20.2	34.56	32.68	0	0	NE	218	3.87	non-quantifiable	0	NE	2.33846	0.587711	non-quantifiable	neg	Ext, Robot IDVET	27/03/2025	75	50-100 d	8	0-50 d	83	0-100 d	MAG FAST768: 034	80 µl	neat
6188-2	2	2025-01-11	2025	Winter	1	D	6	> 5 years	76	>24months	F	01/10/2018	Salers	Subclinical	15	pos	pos	neg	neg	neg	16S-	unknown	5	23.11	35.89	36.12	36.12	0	NE	non-quantifiable	0	0	0	NE	non-quantifiable	neg	neg	neg	Ext. Robot IDVET	27/03/2025	75	50-100 d	8	0-50 d	83	0-100 d	MAG FAST768: 034	80 µl	neat
9300-2	2	2025-01-11	2025	Winter	1	D	6	> 5 years	77	>24months	F	22/09/2018	HF	Subclinical	15	pos	pos	pos	pos	neg	16S-Mex-CMh-	DI	5	17.76	29.5	32.43	27.31	0	NE	4340	6.1	2050	0	NE	3.63749	0.78533	3.31175	neg	Ext, Robot IDVET	27/03/2025	75	50-100 d	8	0-50 d	83	0-100 d	MAG FAST768: 034	80 µl	neat
9308-2	2	2025-01-11	2025	Winter	1	D	6	> 5 years	76	>24months	F	09/10/2018	HF	Subclinical	15	pos	pos	neg	pos	neg	16S-CMh-	MI	5	18.38	34.55	0	31.26	0	NE	219	0	51.9	0	NE	2.34044	neg	1.71517	neg	Ext, Robot IDVET	27/03/2025	75	50-100 d	8	0-50 d	83	0-100 d	MAG FAST768: 034	80 µl	neat
9313-2	2	2025-01-11	2025	Winter	1	D	6	> 5 years	76	>24months	F	16/10/2018	HF	Subclinical	15	pos	pos	pos	pos	neg	16S-Mex-CMh-	DI	5	19.62	36.05	34.47	33.92	0	NE	non-quantifiable	non-quantifiable	non-quantifiable	0	NE	non-quantifiable	non-quantifiable	non-quantifiable	neg	Ext. Robot IDVET	27/03/2025	75	50-100 d	8	0-50 d	83	0-100 d	MAG FAST768: 034	80 µl	neat
9320-2	2	2025-01-11	2025	Winter	1	D	6	> 5 years	75	>24months	F	02/11/2018	HF	Subclinical	15	pos	pos	pos	neg	neg	16S-Mex-	MI	5	17.86	35.42	33.08	37.2	0	NE	131	non-quantifiable	0	0	NE	2.11727	non-quantifiable	neg	neg	Ext, Robot IDVET	27/03/2025	75	50-100 d	8	0-50 d	83	0-100 d	MAG FAST768: 034	80 µl	neat
9331-2	2	2025-01-11	2025	Winter	1	D	6	> 5 years	75	>24months	F	28/11/2018	HF	Subclinical	15	pos	pos	neg	pos	neg	16S-CMh-	MI	5	18.3	31.04	0	27.63	0	NE	1750	0	1520	0	NE	3.24304	neg	3.18184	neg	Ext, Robot IDVET	27/03/2025	75	50-100 d	8	0-50 d	83	0-100 d	MAG FAST768: 034	80 µl	neat
9341-2	2	2025-01-11	2025	Winter	1	D	6	> 5 years	74	>24months	F	14/12/2018	HF	Subclinical	15	pos	pos	pos	pos	neg	16S-Mex-CMh-	DI	5	18.68	31.51	30.29	30.95	0	NE	1320	300	69.3	0	NE	3.12057	2.47712	1.84073	neg	Ext, Robot IDVET	27/03/2025	75	50-100 d	8	0-50 d	83	0-100 d	MAG FAST768: 034	80 µl	neat
9355-2	2	2025-01-11	2025	Winter	1	D	6	> 5 years	73	>24months	F	05/01/2019	HF	Subclinical	15	pos	pos	pos	pos	neg	16S-Mex-CMh-	DI	5	17.87	28.79	28.3	28.17	0	NE	6600	11300	922	0	NE	3.81954	4.05308	2.96473	neg	Ext, Robot IDVET	27/03/2025	75	50-100 d	8	0-50 d	83	0-100 d	MAG FAST768: 034	80 µl	neat
9375-2	2	2025-01-11	2025	Winter	1	D	6	> 5 years	71	>24months	F	05/03/2019	HF	Subclinical	15	pos	pos	neg	pos	pos	16S-CMh-Mass	DI	5	17.67	33.24	0	32.57	32.56	NE	475	0	non-quantifiable	444	NE	2.67669	neg	non-quantifiable	2.64738	Ext, Robot IDVET	27/03/2025	75	50-100 d	8	0-50 d	83	0-100 d	MAG FAST768: 034	80 µl	neat
9378-2	2	2025-01-11	2025	Winter	1	D	6	> 5 years	71	>24months	F	18/03/2019	HF	Subclinical	15	pos	pos	pos	pos	neg	16S-Mex-CMh-	DI	5	18.32	31.12	30.79	27.42	0	NE	1660	121	1850	0	NE	3.22011	2.08279	3.26717	neg	Ext, Robot IDVET	27/03/2025	75	50-100 d	8	0-50 d	83	0-100 d	MAG FAST768: 034	80 µl	neat
9381-2	2	2025-01-11	2025	Winter	1	D	6	> 5 years	70	>24months	F	08/04/2019	brown suiss	Subclinical	15	pos	pos	pos	pos	pos	16S-Mex-CMh-Mass	TI	5	22.52	33.78	33.14	33.14	31.64	NE	519	non-quantifiable	non-quantifiable	994	NE	2.71517	non-quantifiable	non-quantifiable	2.99739	Ext, Robot IDVET	27/03/2025	75	50-100 d	8	0-50 d	83	0-100 d	MAG FAST768: 034	80 µl	neat
9388-2	2	2025-01-11	2025	Winter	1	D	6	> 5 years	69	>24months	F	20/05/2019	HF	Subclinical	15	pos	neg	neg	neg	neg	NI	NI	5	18.11	0	0	0	0	NE	0	0	0	0	NE	neg	neg	neg	neg	Ext. Robot IDVET	27/03/2025	75	50-100 d	8	0-50 d	83	0-100 d	MAG FAST768: 034	80 µl	neat
9392-2	2	2025-01-11	2025	Winter	1	D	6	> 5 years	68	>24months	F	19/06/2019	HF	Subclinical	15	pos	pos	pos	pos	neg	16S-Mex-CMh-	DI	5	18.68	30.36	28.72	29.24	0	NE	2610	5240	340	0	NE	3.41664	3.71933	2.53148	neg	Ext, Robot IDVET	27/03/2025	75	50-100 d	8	0-50 d	83	0-100 d	MAG FAST768: 034	80 µl	neat
9400-2	2	2025-01-11	2025	Winter	1	D	5	4 -5 years	67	>24months	F	24/07/2019	brown suiss	Subclinical	15	pos	pos	neg	pos	neg	16S-CMh-	MI	5	19.98	34.24	0	29.91	0	NE	92.9	0	61.4	0	NE	1.96802	neg	1.78817	neg	Ext, Robot IDVET	27/03/2025	75	50-100 d	8	0-50 d	83	0-100 d	MAG FAST768: 034	80 µl	neat
9413-2	2	2025-01-11	2025	Winter	1	D	5	4 -5 years	65	>24months	F	03/09/2019	HF	Subclinical	15	pos	pos	neg	pos	neg	16S-CMh-	MI	5	18.48	29.5	0	26.71	0	NE	4340	0	3590	0	NE	3.63749	neg	3.55509	neg	Ext, Robot IDVET	27/03/2025	75	50-100 d	8	0-50 d	83	0-100 d	MAG FAST768: 034	80 µl	neat
9414-2	2	2025-01-11	2025	Winter	1	D	5	4 -5 years	65	>24months	F	05/09/2019	HF	Subclinical	15	pos	pos	neg	pos	neg	16S-CMh-	MI	5	19.65	31	0	27.93	0	NE	744	0	358	0	NE	2.87157	neg	2.55388	neg	Ext, Robot IDVET	27/03/2025	75	50-100 d	8	0-50 d	83	0-100 d	MAG FAST768: 034	80 µl	neat
9415-2	2	2025-01-11	2025	Winter	1	D	5	4 -5 years	65	>24months	F	09/09/2019	HF	Subclinical	15	pos	pos	neg	pos	neg	16S-CMh-	MI	5	18.73	31.3	0	26.94	37.35	NE	1500	0	2900	0	NE	3.17609	neg	3.4624	neg	Ext, Robot IDVET	27/03/2025	75	50-100 d	8	0-50 d	83	0-100 d	MAG FAST768: 034	80 µl	neat
9429-2	2	2025-01-11	2025	Winter	1	D	5	4 -5 years	64	>24months	F	15/10/2019	HF	Subclinical	15	pos	pos	pos	pos	neg	16S-Mex-CMh-	DI	5	19.43	31.42	28.21	31.26	0	NE	1390	13300	51.9	0	NE	3.14301	4.12385	1.71517	neg	Ext, Robot IDVET	27/03/2025	75	50-100 d	8	0-50 d	83	0-100 d	MAG FAST768: 034	80 µl	neat
1152-28	28	2024-12-09	2024	Winter	12	B	6	> 5 years	77	>24months	F	23/08/2018	crossbred	Subclinical	15	pos	pos	pos	pos	neg	16S-Mex-CMh-	DI	5	20.44	31.17	35.93	28.25	0	NE	586	non-quantifiable	218	0	NE	2.7679	non-quantifiable	2.33846	neg	Ext, Robot IDVET	14/03/2025	95	50-100 d	3	0-50 d	98	0-100 d	MAG FAST768: 034	80 µl	neat
1168-28	28	2024-12-09	2024	Winter	12	B	6	> 5 years	74	>24months	F	08/11/2018	crossbred	Subclinical	15	pos	pos	neg	pos	neg	16S-CMh-	MI	5	20.91	35.75	0	33.4	0	NE	non-quantifiable	0	non-quantifiable	0	NE	non-quantifiable	neg	non-quantifiable	neg	Ext. Robot IDVET	14/03/2025	95	50-100 d	3	0-50 d	98	0-100 d	MAG FAST768: 034	80 µl	neat
1797-28	28	2024-12-09	2024	Winter	12	B	12	> 5 years	149	>24months	F	15/09/2012	brown suiss	Subclinical	15	pos	neg	neg	neg	neg	NI	NI	5	20.34	38.5	0	0	0	NE	0	0	0	0	NE	neg	neg	neg	neg	Ext. Robot IDVET	14/03/2025	95	50-100 d	3	0-50 d	98	0-100 d	MAG FAST768: 034	80 µl	neat
3080-28	28	2024-12-09	2024	Winter	12	B	4	4 -5 years	50	>24months	F	02/11/2020	brown suiss	Subclinical	15	pos	pos	pos	pos	neg	16S-Mex-CMh-	DI	5	20.65	31.44	29.62	35.63	0	NE	non-quantifiable	1980	non-quantifiable	0	NE	non-quantifiable	3.2966651902615309	non-quantifiable	neg	Ext. Robot IDVET	14/03/2025	95	50-100 d	3	0-50 d	98	0-100 d	MAG FAST768: 034	80 µl	neat
3176-28	28	2024-12-09	2024	Winter	12	B	4	4 -5 years	52	>24months	F	06/09/2020	Aubrac	Subclinical	15	pos	pos	pos	neg	pos	16S-Mex-Mass	DI	5	22.04	31.46	31.78	36.22	31.78	NE	495	560	0	189	NE	2.69461	2.74819	neg	2.27646	Ext, Robot IDVET	14/03/2025	95	50-100 d	3	0-50 d	98	0-100 d	MAG FAST768: 034	80 µl	neat
3178-28	28	2024-12-09	2024	Winter	12	B	4	4 -5 years	52	>24months	F	07/09/2020	Aubrac	Subclinical	15	pos	pos	neg	neg	neg	16S-	unknown	5	19.46	37.05	0	0	0	NE	non-quantifiable	0	0	0	NE	non-quantifiable	neg	neg	neg	Ext. Robot IDVET	14/03/2025	95	50-100 d	3	0-50 d	98	0-100 d	MAG FAST768: 034	80 µl	neat
3212-28	28	2024-12-09	2024	Winter	12	B	4	4 -5 years	50	>24months	F	01/11/2020	Aubrac	Subclinical	15	pos	pos	pos	neg	neg	16S-Mex-	MI	5	19.83	31.94	29.83	0	0	NE	374	1750	0	0	NE	2.57287	3.24304	neg	neg	Ext, Robot IDVET	14/03/2025	95	50-100 d	3	0-50 d	98	0-100 d	MAG FAST768: 034	80 µl	neat
6096-28	28	2024-12-09	2024	Winter	12	B	3	3 years	35	>24months	F	22/01/2022	Aubrac	Subclinical	15	pos	pos	pos	pos	neg	16S-Mex-CMh-	DI	5	20.31	32.28	33.2	32.16	0	NE	307	non-quantifiable	non-quantifiable	0	NE	2.48714	non-quantifiable	non-quantifiable	neg	Ext, Robot IDVET	14/03/2025	95	50-100 d	3	0-50 d	98	0-100 d	MAG FAST768: 034	80 µl	neat
6097-28	28	2024-12-09	2024	Winter	12	B	3	3 years	35	>24months	F	31/01/2022	Aubrac	Subclinical	15	pos	pos	pos	pos	neg	16S-Mex-CMh-	DI	5	18.89	33.33	34.14	33.23	0	NE	166	non-quantifiable	non-quantifiable	0	NE	2.22011	non-quantifiable	non-quantifiable	neg	Ext, Robot IDVET	14/03/2025	95	50-100 d	3	0-50 d	98	0-100 d	MAG FAST768: 034	80 µl	neat
7057-28	28	2024-12-09	2024	Winter	12	B	3	3 years	34	>24months	F	24/02/2022	Aubrac	Subclinical	15	pos	pos	pos	pos	neg	16S-Mex-CMh-	DI	5	19.61	26.14	25.27	29.47	0	NE	11000	25100	133	0	NE	4.04139	4.39967	2.12385	neg	Ext, Robot IDVET	14/03/2025	95	50-100 d	3	0-50 d	98	0-100 d	MAG FAST768: 034	80 µl	neat
115-13	13	2024-02-12	2024	Winter	2	B	2	2 years	30	>24months	F	26/08/2021	Charolaise	Subclinical	42	pos	pos	pos	pos	neg	16S-Mex-CMh-	DI	5	16.72	30.69	31	28.47	0	NE	14000	559	545	0	NE	4.14613	2.74741	2.7364	neg	Ext, Robot IDVET	03/05/2024	81	50-100 d	20	0-50 d	101	100-200 d	MAG FAST768: 034	80 µl	neat
1197-13	13	2024-02-12	2024	Winter	2	B	7	> 5 years	91	>24months	M	30/08/2016	Charolaise	Subclinical	42	pos	pos	pos	pos	neg	16S-Mex-CMh-	DI	5	15.29	29.69	32.34	28.03	0	NE	26000	256	771	0	NE	4.41497	2.40824	2.88705	neg	Ext, Robot IDVET	03/05/2024	81	50-100 d	18	0-50 d	99	0-100 d	MAG FAST768: 034	80 µl	neat
3149-13	13	2024-02-12	2024	Winter	2	B	2	2 years	29	>24months	M	20/09/2021	Charolaise	Subclinical	42	pos	pos	pos	pos	pos	16S-Mex-CMh-Mass	TI	5	16.48	30.02	32.55	27.96	31.21	NE	21000	227	814	178	NE	4.32222	2.35603	2.91062	2.25042	Ext, Robot IDVET	03/05/2024	81	50-100 d	20	0-50 d	101	100-200 d	MAG FAST768: 034	80 µl	neat
4020-13	13	2024-02-12	2024	Winter	2	B	3	3 years	42	>24months	F	13/09/2020	Charolaise	Subclinical	42	pos	pos	pos	neg	neg	16S-Mex-	MI	5	16.43	30.19	29.02	0	0	NE	19000	1770	0	0	NE	4.27875	3.24797	neg	neg	Ext, Robot IDVET	03/05/2024	81	50-100 d	20	0-50 d	101	100-200 d	MAG FAST768: 034	80 µl	neat
5418-13	13	2024-02-12	2024	Winter	2	B	8	> 5 years	103	>24months	F	01/09/2015	Charolaise	Subclinical	42	pos	pos	pos	neg	neg	16S-Mex-	MI	5	18.59	32.19	32.02	0	0	NE	5500	309	0	0	NE	3.74036	2.48996	neg	neg	Ext, Robot IDVET	03/05/2024	81	50-100 d	20	0-50 d	101	100-200 d	MAG FAST768: 034	80 µl	neat
70-13	13	2024-02-12	2024	Winter	2	B	3	3 years	42	>24months	F	11/09/2020	Charolaise	Subclinical	42	pos	pos	pos	neg	neg	16S-Mex-	MI	5	19.8	33.14	33.63	0	0	NE	3100	non-quantifiable	0	0	NE	3.49136	non-quantifiable	neg	neg	Ext, Robot IDVET	03/05/2024	81	50-100 d	20	0-50 d	101	100-200 d	MAG FAST768: 034	80 µl	neat
74-13	13	2024-02-12	2024	Winter	2	B	3	3 years	42	>24months	F	12/09/2020	Charolaise	Subclinical	42	pos	pos	pos	pos	neg	16S-Mex-CMh-	DI	5	15.3	30.3	30.34	29.85	0	NE	18000	821	184	0	NE	4.25527	2.91434	2.26482	neg	Ext, Robot IDVET	03/05/2024	81	50-100 d	20	0-50 d	101	100-200 d	MAG FAST768: 034	80 µl	neat
7569-13	13	2024-02-12	2024	Winter	2	B	2	2 years	30	>24months	F	02/09/2021	Charolaise	Subclinical	42	pos	pos	pos	pos	pos	16S-Mex-CMh-Mass	TI	5	18.99	32.4	33.51	30.44	34.74	NE	4900	non-quantifiable	116	non-quantifiable	NE	3.6902	non-quantifiable	2.06446	non-quantifiable	Ext, Robot IDVET	03/05/2024	81	50-100 d	20	0-50 d	101	100-200 d	MAG FAST768: 034	80 µl	neat
7575-13	13	2024-02-12	2024	Winter	2	B	2	2 years	30	>24months	F	06/09/2021	Charolaise	Subclinical	42	pos	pos	pos	pos	neg	16S-Mex-CMh-	DI	5	15.95	31.13	31.88	28	0	NE	11000	335	789	0	NE	4.04139	2.52504	2.89708	neg	Ext, Robot IDVET	03/05/2024	81	50-100 d	20	0-50 d	101	100-200 d	MAG FAST768: 034	80 µl	neat
7579-13	13	2024-02-12	2024	Winter	2	B	2	2 years	30	>24months	F	10/09/2021	Charolaise	Subclinical	42	pos	pos	neg	pos	neg	16S-CMh-	MI	5	16.64	33.58	0	29.14	0	NE	2400	0	322	0	NE	3.38021	neg	2.50786	neg	Ext, Robot IDVET	03/05/2024	81	50-100 d	20	0-50 d	101	100-200 d	MAG FAST768: 034	80 µl	neat
7581-13	13	2024-02-12	2024	Winter	2	B	2	2 years	29	>24months	F	11/09/2021	Charolaise	Subclinical	42	pos	neg	pos	neg	neg	Mex-	unknown	5	18.46	38.72	35.33	37.7	0	NE	0	NE	0	0	NE	neg	NE	neg	neg	Ext. Robot IDVET	03/05/2024	81	50-100 d	20	0-50 d	101	100-200 d	MAG FAST768: 034	80 µl	neat
7593-13	13	2024-02-12	2024	Winter	2	B	2	2 years	29	>24months	F	18/09/2021	Charolaise	Subclinical	42	pos	pos	neg	pos	neg	16S-CMh-	MI	5	16.82	32.89	0	28.56	0	NE	NE	0	NE	0	NE	NE	neg	NE	neg	Ext. Robot IDVET	03/05/2024	81	50-100 d	20	0-50 d	101	100-200 d	MAG FAST768: 034	80 µl	neat
7595-13	13	2024-02-12	2024	Winter	2	B	2	2 years	29	>24months	F	18/09/2021	Charolaise	Subclinical	42	pos	pos	neg	pos	neg	16S-CMh-	MI	5	17.17	31.07	0	27.47	35.17	NE	NE	0	NE	0	NE	NE	neg	NE	neg	Ext. Robot IDVET	03/05/2024	81	50-100 d	20	0-50 d	101	100-200 d	MAG FAST768: 034	80 µl	neat
7604-13	13	2024-02-12	2024	Winter	2	B	2	2 years	29	>24months	F	03/10/2021	Charolaise	Subclinical	42	pos	pos	neg	pos	neg	16S-CMh-	MI	5	21.55	33.45	0	30.15	0	NE	2500	0	146	0	NE	3.39794	neg	2.16435	neg	Ext, Robot IDVET	03/05/2024	81	50-100 d	20	0-50 d	101	100-200 d	MAG FAST768: 034	80 µl	neat
7626-13	13	2024-02-12	2024	Winter	2	B	2	2 years	27	>24months	F	16/11/2021	Charolaise	Subclinical	42	pos	pos	neg	pos	neg	16S-CMh-	MI	5	15.67	30.39	0	26.8	37.9	NE	17000	0	2030	0	NE	4.23045	neg	3.3075	neg	Ext, Robot IDVET	03/05/2024	81	50-100 d	20	0-50 d	101	100-200 d	MAG FAST768: 034	80 µl	neat
8658-13	13	2024-02-12	2024	Winter	2	B	4	4 -5 years	44	>24months	F	12/07/2020	Charolaise	Subclinical	42	pos	pos	pos	pos	pos	16S-Mex-CMh-Mass	TI	5	16.13	31.56	34.21	29.87	33.29	NE	8200	non-quantifiable	182	non-quantifiable	NE	3.91381	non-quantifiable	2.26007	non-quantifiable	Ext, Robot IDVET	03/05/2024	81	50-100 d	18	0-50 d	99	0-100 d	MAG FAST768: 034	80 µl	neat
87-13	13	2024-02-12	2024	Winter	2	B	3	3 years	41	>24months	F	21/09/2020	Charolaise	Subclinical	42	pos	pos	neg	pos	neg	16S-CMh-	MI	5	17.01	30.98	36.01	26.93	0	NE	12000	0	1830	0	NE	4.07918	neg	3.26245	neg	Ext, Robot IDVET	03/05/2024	81	50-100 d	20	0-50 d	101	100-200 d	MAG FAST768: 034	80 µl	neat
89-13	13	2024-02-12	2024	Winter	2	B	3	3 years	41	>24months	F	23/09/2020	Charolaise	Subclinical	42	pos	pos	pos	pos	neg	16S-Mex-CMh-	DI	5	18.06	33.91	33.27	33.63	35.61	NE	1900	non-quantifiable	non-quantifiable	0	NE	3.27875	non-quantifiable	non-quantifiable	neg	Ext, Robot IDVET	03/05/2024	81	50-100 d	20	0-50 d	101	100-200 d	MAG FAST768: 034	80 µl	neat
9897-13	13	2024-02-12	2024	Winter	2	B	10	> 5 years	127	>24months	F	06/09/2013	Charolaise	Subclinical	42	pos	pos	pos	pos	neg	16S-Mex-CMh-	DI	5	17.28	35.16	35.79	31.3	0	NE	non-quantifiable	non-quantifiable	59	0	NE	non-quantifiable	non-quantifiable	1.7708520116421442	neg	Ext. Robot IDVET	03/05/2024	81	50-100 d	20	0-50 d	101	100-200 d	MAG FAST768: 034	80 µl	neat
1909-38	38	2024-09-05	2024	Automn	9	B	3	3 years	37	>24months	M	12/08/2021	crossbred	Subclinical	31	pos	pos	pos	neg	pos	16S-Mex-Mass	DI	5	15.41	26.46	29.86	35.25	27.07	133000	2410	2130	0	31700	5.12385	3.38202	3.32838	neg	4.50106	Ext, Robot IDVET	20/09/2024	15	0-50 d	5	0-50 d	20	0-100 d	MAG FAST768: 034	80 µl	neat
4956-38	38	2025-01-17	2025	Winter	1	D	10	> 5 years	126	>24months	F	05/09/2014	HF	Subclinical	31	pos	pos	pos	neg	neg	16S-Mex-	MI	5	18.07	37.15	34.45	0	0	150000	non-quantifiable	non-quantifiable	0	0	5.1760912590556813	non-quantifiable	non-quantifiable	neg	neg	Ext, Robot IDVET	19/02/2025	33	0-50 d	1	0-50 d	34	0-100 d	?	80 µl	neat
9160-7	7	2022-09-24	2022	Automn	9	D	3	3 years	36	>24months	F	30/09/2019	HF	Subclinical	31	pos	pos	pos	pos	neg	16S-Mex-CMh-	DI	5	23.07	31.25	30.83	32.41	0	17200	577	832	non-quantifiable	0	4.23553	2.76118	2.92012	non-quantifiable	neg	Ext, Kit Qiagen	05/10/2022	11	0-50 d	842	>100 d	853	>200 d	Kit : 172013961	100 µl	10-2
736-7	7	2022-08-16	2022	Summer	8	D	2	2 years	26	>24months	F	22/06/2020	HF	Subclinical	31	pos	pos	pos	pos	neg	16S-Mex-CMh-	DI	5	21.08	24.09	23.85	23.85	0	29900	36700	39500	39500	0	4.47567	4.56467	4.5966	4.5966	neg	Ext, Kit Qiagen	02/09/2022	17	0-50 d	857	>100 d	874	>200 d	kit 172013961	100 µl	10-2
5512-7	7	2022-07-27	2022	Summer	7	D	7	> 5 years	81	>24months	F	17/11/2015	HF	Subclinical	31	pos	pos	pos	pos	neg	16S-Mex-CMh-	DI	5	23.26	34.47	32.27	32.27	0	10300	76.8	464	non-quantifiable	0	4.01284	1.88536	2.66652	non-quantifiable	neg	Ext, Kit Qiagen	04/10/2022	69	50-100 d	825	>100 d	894	>200 d	kit 172013961	100 µl	10-2
711-7	7	2022-07-27	2022	Summer	7	D	2	2 years	30	>24months	F	31/01/2020	HF	Subclinical	31	pos	neg	pos	pos	neg	Mex-CMh-	unknown	5	28.26	0	32.21	32.21	0	881	0	479	non-quantifiable	0	2.9449759084120477	neg	2.6803355134145632	non-quantifiable	neg	Ext. Robot IDVET	17/10/2023	447	>100 d	447	>100 d	894	>200 d	MAG FAST768: 034	100 µl	10-2
740-7	7	2022-07-27	2022	Summer	7	D	2	2 years	24	18 months-24 months	F	01/08/2020	HF	Subclinical	31	pos	pos	pos	pos	neg	16S-Mex-CMh-	DI	5	19.99	29.16	28.42	28.42	0	51000	1800	3540	3540	0	4.70757	3.25527	3.549	3.549	neg	Ext, Kit Qiagen	04/10/2022	69	50-100 d	825	>100 d	894	>200 d	kit 172013961	100 µl	10-2
750-7	7	2022-07-27	2022	Summer	7	D	2	2 years	23	18 months-24 months	F	12/09/2020	HF	Subclinical	31	pos	pos	pos	pos	neg	16S-Mex-CMh-	DI	5	23.44	30.97	29.83	29.83	0	9380	615	1680	1680	0	3.9722	2.78888	3.22531	3.22531	neg	Ext, Kit Qiagen	04/10/2022	69	50-100 d	825	>100 d	894	>200 d	kit 172013961	100 µl	10-2
751-7	7	2022-07-27	2022	Summer	7	D	2	2 years	23	18 months-24 months	F	18/09/2020	HF	Subclinical	31	pos	pos	neg	neg	neg	16S-	unknown	5	22.88	34.77	0	0	0	12400	NE	0	0	0	4.0934216851622347	NE	neg	neg	neg	Ext. Kit Qiagen	04/10/2022	69	50-100 d	825	>100 d	894	>200 d	kit 172013961	100 µl	10-2
7550-7	7	2022-07-27	2022	Summer	7	D	5	4 -5 years	57	>24months	F	12/11/2017	HF	Subclinical	31	pos	pos	pos	pos	neg	16S-Mex-CMh-	DI	5	23.18	32.31	32.41	32.41	0	10700	277	431	non-quantifiable	0	4.02938	2.44248	2.63448	non-quantifiable	neg	Ext, Kit Qiagen	04/10/2022	69	50-100 d	825	>100 d	894	>200 d	kit 172013961	100 µl	10-2
7525-7	7	2022-07-12	2022	Summer	7	D	5	4 -5 years	60	>24months	F	13/08/2017	HF	Subclinical	31	pos	pos	pos	pos	neg	16S-Mex-CMh-	DI	5	19.24	30.16	31.2	31.2	0	73700	995	816	816	0	4.86747	2.99782	2.91169	2.91169	neg	Ext, Kit Qiagen	02/09/2022	52	50-100 d	857	>100 d	909	>200 d	kit 172013961	100 µl	10-2
7531-7	7	2022-07-12	2022	Summer	7	D	5	4 -5 years	58	>24months	F	26/09/2017	HF	Subclinical	31	pos	pos	neg	neg	neg	16S-	unknown	5	19.78	32.91	36.78	36.78	0	56600	194	0	0	0	4.75282	2.2878	neg	neg	neg	Ext, Kit Qiagen	02/09/2022	52	50-100 d	857	>100 d	909	>200 d	kit 172013961	100 µl	10-2
8112-7	7	2022-07-27	2022	Summer	7	D	4	4 -5 years	54	>24months	F	09/02/2018	HF	Subclinical	31	pos	pos	pos	pos	neg	16S-Mex-CMh-	DI	5	24.82	33.22	33.2	31.2	0	7770	170	non-quantifiable	436	0	3.89042	2.23045	non-quantifiable	2.63949	neg	Ext, Kit Qiagen	04/10/2022	69	50-100 d	843	>100 d	912	>200 d	Kit : 172013961	100 µl	10-2
9150-7	7	2022-07-27	2022	Summer	7	D	3	3 years	37	>24months	F	15/07/2019	HF	Subclinical	31	pos	pos	pos	neg	neg	16S-Mex-	MI	5	23.08	34.55	33.5	0	0	17100	74.5	non-quantifiable	0	0	4.233	1.87216	non-quantifiable	neg	neg	Ext, Kit Qiagen	04/10/2022	69	50-100 d	843	>100 d	912	>200 d	Kit : 172013961	100 µl	10-2
9157-7	7	2022-07-27	2022	Summer	7	D	3	3 years	35	>24months	F	21/09/2019	HF	Subclinical	31	pos	pos	pos	pos	neg	16S-Mex-CMh-	DI	5	23.24	36.69	34.63	32.64	0	15900	non-quantifiable	non-quantifiable	non-quantifiable	0	4.2013971243204518	non-quantifiable	non-quantifiable	non-quantifiable	neg	Ext. Kit Qiagen	04/10/2022	69	50-100 d	843	>100 d	912	>200 d	Kit : 172013961	100 µl	10-2
9178-7	7	2022-07-27	2022	Summer	7	D	3	3 years	33	>24months	F	17/11/2019	HF	Subclinical	31	pos	pos	pos	pos	neg	16S-Mex-CMh-	DI	5	19.55	31.58	33.01	29.09	0	84500	470	non-quantifiable	1700	0	4.92686	2.6721	non-quantifiable	3.23045	neg	Ext, Kit Qiagen	04/10/2022	69	50-100 d	843	>100 d	912	>200 d	Kit : 172013961	100 µl	10-2
708-7	7	2022-06-21	2022	Summer	6	D	2	2 years	30	>24months	F	16/01/2020	HF	Subclinical	31	pos	pos	pos	pos	neg	16S-Mex-CMh-	DI	5	21.9	33.38	32.65	32.65	0	20000	147	379	non-quantifiable	0	4.30103	2.16732	2.57864	non-quantifiable	neg	Ext, Kit Qiagen	01/08/2022	41	0-50 d	889	>100 d	930	>200 d	kit 172013961	100 µl	10-2
7539-7	7	2022-06-21	2022	Summer	6	D	5	4 -5 years	57	>24months	F	11/10/2017	HF	Subclinical	31	pos	pos	neg	neg	neg	16S-	unknown	5	21.96	35.18	0	0	0	19400	non-quantifiable	0	0	0	4.2878017299302265	non-quantifiable	neg	neg	neg	Ext. Kit Qiagen	01/08/2022	41	0-50 d	889	>100 d	930	>200 d	kit 172013961	100 µl	10-2
7527-7	7	2022-06-10	2022	Summer	6	D	5	4 -5 years	58	>24months	F	21/08/2017	HF	Subclinical	31	pos	pos	neg	neg	neg	16S-	unknown	5	23.15	35.09	36.47	36.47	0	10800	non-quantifiable	0	0	0	4.0334237554869494	non-quantifiable	neg	neg	neg	Ext. Kit Qiagen	04/07/2022	24	0-50 d	917	>100 d	941	>200 d	kit 172013961	100 µl	10-2
9148-7	7	2022-06-21	2022	Summer	6	D	3	3 years	36	>24months	F	01/07/2019	HF	Subclinical	31	pos	pos	pos	neg	neg	16S-Mex-	MI	5	23.18	35.17	35.58	0	37.18	16300	non-quantifiable	non-quantifiable	0	0	4.2121876044039581	non-quantifiable	non-quantifiable	neg	neg	Ext. Kit Qiagen	01/08/2022	41	0-50 d	907	>100 d	948	>200 d	Kit : 172013961	100 µl	10-2
9183-7	7	2022-06-21	2022	Summer	6	D	3	3 years	31	>24months	F	26/11/2019	HF	Subclinical	31	pos	pos	pos	pos	pos	16S-Mex-CMh-Mass	TI	5	23.47	30.43	30.8	32.89	32.51	14300	959	846	non-quantifiable	non-quantifiable	4.15534	2.98182	2.92737	non-quantifiable	non-quantifiable	Ext, Kit Qiagen	01/08/2022	41	0-50 d	907	>100 d	948	>200 d	Kit : 172013961	100 µl	10-2
719-7	7	2022-05-03	2022	Spring	5	D	2	2 years	26	>24months	F	09/03/2020	HF	Subclinical	31	pos	pos	pos	pos	neg	16S-Mex-CMh-	DI	5	22.37	29.29	29.11	29.11	0	15900	1670	2460	2460	0	4.2014	3.22272	3.39094	3.39094	neg	Ext, Kit Qiagen	19/06/2022	47	0-50 d	932	>100 d	979	>200 d	kit 172013961	100 µl	10-2
730-7	7	2022-05-03	2022	Spring	5	D	2	2 years	24	18 months-24 months	F	08/05/2020	HF	Subclinical	31	pos	pos	pos	pos	neg	16S-Mex-CMh-	DI	5	22.68	32.68	30.61	30.61	0	13600	223	1110	1110	0	4.13354	2.3483	3.04532	3.04532	neg	Ext, Kit Qiagen	19/06/2022	47	0-50 d	932	>100 d	979	>200 d	kit 172013961	100 µl	10-2
723-7	7	2022-03-30	2022	Spring	3	D	2	2 years	24	18 months-24 months	F	26/03/2020	HF	Subclinical	31	pos	pos	pos	pos	pos	16S-Mex-CMh-Mass	TI	5	22.76	28.99	29.77	29.77	30.88	13100	2000	1740	1740	228	4.11727	3.30103	3.24055	3.24055	2.35793	Ext, Kit Qiagen	19/04/2022	20	0-50 d	993	>100 d	1013	>200 d	Kit"défectueux"169019446	100 µl	10-2
712-7	7	2022-03-09	2022	Spring	3	D	2	2 years	26	>24months	F	31/01/2020	HF	Subclinical	31	pos	pos	pos	pos	neg	16S-Mex-CMh-	DI	5	21.9	33.83	33.16	33.16	36.79	20000	112	non-quantifiable	non-quantifiable	0	4.30103	2.04922	non-quantifiable	non-quantifiable	neg	Ext, Kit Qiagen	19/04/2022	41	0-50 d	993	>100 d	1034	>200 d	Kit"défectueux"169019446	100 µl	10-2
7541-7	7	2022-03-09	2022	Spring	3	D	4	4 -5 years	53	>24months	F	24/10/2017	HF	Subclinical	31	pos	pos	pos	pos	neg	16S-Mex-CMh-	DI	5	22.91	32.16	31.84	31.84	0	12200	303	582	582	0	4.08636	2.48144	2.76492	2.76492	neg	Ext, Kit Qiagen	19/04/2022	41	0-50 d	993	>100 d	1034	>200 d	Kit"défectueux"169019446	100 µl	10-2
9141-7	7	2022-03-30	2022	Spring	3	D	3	3 years	35	>24months	F	20/05/2019	HF	Subclinical	31	pos	pos	pos	neg	neg	16S-Mex-	MI	5	22.46	32.41	31.25	0	35.31	22600	281	659	0	0	4.35411	2.44871	2.81889	neg	neg	Ext, Kit Qiagen	19/04/2022	20	0-50 d	1011	>100 d	1031	>200 d	Kit"défectueux"169019446	100 µl	10-2
9713-7	7	2022-03-30	2022	Spring	3	D	2	2 years	29	>24months	F	02/11/2019	HF	Subclinical	31	pos	pos	neg	pos	neg	16S-CMh-	MI	5	22.14	33.3	0	31.85	37.31	26200	162	0	287	0	4.4183	2.20952	neg	2.45788	neg	Ext, Kit Qiagen	19/04/2022	20	0-50 d	1011	>100 d	1031	>200 d	Kit"défectueux"169019446	100 µl	10-2
9131-7	7	2022-03-01	2022	Spring	3	D	3	3 years	36	>24months	F	24/03/2019	HF	Subclinical	31	pos	pos	pos	neg	neg	16S-Mex-	MI	5	22.49	35.53	32.91	0	0	22300	non-quantifiable	263	0	0	4.3483048630481607	non-quantifiable	2.419955748489758	neg	neg	Ext. Kit Qiagen	19/04/2022	49	0-50 d	1011	>100 d	1060	>200 d	Kit"défectueux"169019446	100 µl	10-2
9124-7	7	2021-11-30	2021	Automn	11	D	3	3 years	35	>24months	F	13/01/2019	HF	Subclinical	31	pos	pos	pos	neg	neg	16S-Mex-	MI	5	24.27	33.39	31.96	0	0	9970	153	445	0	0	3.9987	2.18469	2.64836	neg	neg	Ext, Kit Qiagen	01/12/2021	1	0-50 d	1150	>100 d	1151	>200 d	Kit dernier 169031338	100 µl	10-2
1707-18	18	2024-01-24	2024	Winter	1	B	7	> 5 years	88	>24months	M	27/10/2016	Charolaise	Subclinical	42	pos	pos	pos	neg	pos	16S-Mex-Mass	DI	5	18.13	34.93	35.58	0	34.27	NE	81.4	non-quantifiable	0	non-quantifiable	NE	1.91062	non-quantifiable	neg	non-quantifiable	Ext, Robot IDVET	03/04/2024	70	50-100 d	9	0-50 d	79	0-100 d	MAG FAST768: 034	80 µl	neat
1731-18	18	2024-01-24	2024	Winter	1	B	6	> 5 years	78	>24months	F	01/09/2017	Limousine	Subclinical	42	pos	neg	neg	neg	neg	NI	NI	5	18.21	0	0	0	0	NE	0	0	0	0	NE	neg	neg	neg	neg	Ext. Robot IDVET	03/04/2024	70	50-100 d	9	0-50 d	79	0-100 d	MAG FAST768: 034	80 µl	neat
3258-18	18	2024-01-24	2024	Winter	1	B	9	> 5 years	113	>24months	F	24/10/2014	Limousine	Subclinical	42	pos	pos	neg	pos	neg	16S-CMh-	MI	5	18.2	35.86	33.47	34.66	0	NE	non-quantifiable	18.3	non-quantifiable	0	NE	non-quantifiable	1.2624510897304295	non-quantifiable	neg	Ext. Robot IDVET	03/04/2024	70	50-100 d	9	0-50 d	79	0-100 d	MAG FAST768: 034	80 µl	neat
4708-18	18	2024-01-24	2024	Winter	1	B	2	2 years	28	>24months	F	28/09/2021	Limousine	Subclinical	42	pos	pos	pos	pos	neg	16S-Mex-CMh-	DI	5	18.48	32.48	34.2	30.32	0	NE	950	non-quantifiable	34.3	0	NE	2.97772	non-quantifiable	1.53529	neg	Ext, Robot IDVET	03/04/2024	70	50-100 d	9	0-50 d	79	0-100 d	MAG FAST768: 034	80 µl	neat
4718-18	18	2024-01-24	2024	Winter	1	B	2	2 years	27	>24months	F	09/11/2021	Limousine	Subclinical	42	pos	pos	pos	pos	neg	16S-Mex-CMh-	DI	5	18.16	28.93	27.7	30.07	0	NE	17000	1710	41.3	0	NE	4.23045	3.233	1.61595	neg	Ext, Robot IDVET	03/04/2024	70	50-100 d	9	0-50 d	79	0-100 d	MAG FAST768: 034	80 µl	neat
5543-18	18	2024-01-24	2024	Winter	1	B	5	4 -5 years	65	>24months	F	30/09/2018	Limousine	Subclinical	42	pos	pos	pos	neg	neg	16S-Mex-	MI	5	18.12	35	29.69	0	0	NE	120	357	0	0	NE	2.07918	2.55267	neg	neg	Ext, Robot IDVET	03/04/2024	70	50-100 d	9	0-50 d	79	0-100 d	MAG FAST768: 034	80 µl	neat
5564-18	18	2024-01-24	2024	Winter	1	B	4	4 -5 years	54	>24months	F	26/08/2019	Limousine	Subclinical	42	pos	pos	neg	pos	neg	16S-CMh-	MI	5	16.51	34.99	0	33.06	37.82	NE	120	0	non-quantifiable	0	NE	2.07918	neg	non-quantifiable	neg	Ext, Robot IDVET	03/04/2024	70	50-100 d	29	0-50 d	99	0-100 d	MAG FAST768: 034	80 µl	neat
6024-18	18	2024-01-24	2024	Winter	1	B	3	3 years	40	>24months	F	28/09/2020	Limousine	Subclinical	42	pos	pos	pos	pos	neg	16S-Mex-CMh-	DI	5	18.49	31.9	34.31	29.17	0	NE	1500	non-quantifiable	80.7	0	NE	3.17609	non-quantifiable	1.90687	neg	Ext, Robot IDVET	03/04/2024	70	50-100 d	9	0-50 d	79	0-100 d	MAG FAST768: 034	80 µl	neat
6051-18	18	2024-01-24	2024	Winter	1	B	2	2 years	29	>24months	F	21/09/2021	Limousine	Subclinical	42	pos	pos	pos	pos	neg	16S-Mex-CMh-	DI	5	18.75	34.81	33.57	29.48	35.17	NE	140	non-quantifiable	64.1	0	NE	2.14613	non-quantifiable	1.80686	neg	Ext, Robot IDVET	03/04/2024	70	50-100 d	9	0-50 d	79	0-100 d	MAG FAST768: 034	80 µl	neat
6053-18	18	2024-01-24	2024	Winter	1	B	2	2 years	28	>24months	F	25/09/2021	Limousine	Subclinical	42	pos	pos	pos	pos	neg	16S-Mex-CMh-	DI	5	17.26	31.68	32.86	27.15	0	NE	601	29.5	363	0	NE	2.77887	1.46982	2.55991	neg	Ext, Robot IDVET	03/04/2024	70	50-100 d	9	0-50 d	79	0-100 d	MAG FAST768: 034	80 µl	neat
8818-18	18	2024-01-24	2024	Winter	1	B	6	> 5 years	78	>24months	F	12/09/2017	Limousine	Subclinical	42	pos	pos	pos	neg	pos	16S-Mex-Mass	DI	5	17.25	32.3	32.09	0	33.7	NE	1100	54.1	0	non-quantifiable	NE	3.04139	1.7332	neg	non-quantifiable	Ext, Robot IDVET	03/04/2024	70	50-100 d	29	0-50 d	99	0-100 d	MAG FAST768: 034	80 µl	neat
9472-18	18	2024-01-24	2024	Winter	1	B	3	3 years	41	>24months	F	04/09/2020	Limousine	Subclinical	42	pos	pos	pos	pos	pos	16S-Mex-CMh-Mass	TI	5	17.74	30.16	30.09	33.01	30.42	NE	6300	261	non-quantifiable	152	NE	3.79934	2.41664	non-quantifiable	2.18184	Ext, Robot IDVET	03/04/2024	70	50-100 d	9	0-50 d	79	0-100 d	MAG FAST768: 034	80 µl	neat
9474-18	18	2024-01-24	2024	Winter	1	B	3	3 years	41	>24months	F	05/09/2020	Limousine	Subclinical	42	pos	pos	pos	pos	neg	16S-Mex-CMh-	DI	5	18.47	29.88	29.63	26.96	0	NE	1820	374	418	0	NE	3.26007	2.57287	2.62118	neg	Ext, Robot IDVET	03/04/2024	70	50-100 d	9	0-50 d	79	0-100 d	MAG FAST768: 034	80 µl	neat
9476-18	18	2024-01-24	2024	Winter	1	B	3	3 years	41	>24months	F	13/09/2020	Limousine	Subclinical	42	pos	pos	pos	pos	neg	16S-Mex-CMh-	DI	5	18.47	34.17	30	31.76	0	NE	240	280	11.7	0	NE	2.38021	2.44716	1.06819	neg	Ext, Robot IDVET	03/04/2024	70	50-100 d	9	0-50 d	79	0-100 d	MAG FAST768: 034	80 µl	neat
9478-18	18	2024-01-24	2024	Winter	1	B	3	3 years	41	>24months	F	19/09/2020	Limousine	Subclinical	42	pos	pos	pos	pos	pos	16S-Mex-CMh-Mass	TI	5	17.81	32.22	30.94	28.62	34.78	NE	431	134	122	non-quantifiable	NE	2.63448	2.1271	2.08636	non-quantifiable	Ext, Robot IDVET	03/04/2024	70	50-100 d	9	0-50 d	79	0-100 d	MAG FAST768: 034	80 µl	neat
1962-22	22	2024-01-31	2024	Winter	1	B	4	4 -5 years	49	>24months	F	16/01/2020	Limousine	Subclinical	42	pos	pos	neg	pos	pos	16S-CMh-Mass	DI	5	18.02	30.12	0	29.82	34.09	NE	540	0	64.5	non-quantifiable	NE	2.73239	neg	1.80956	non-quantifiable	Ext, Robot IDVET	09/04/2024	69	50-100 d	36	0-50 d	105	100-200 d	MAG FAST768: 034	80 µl	neat
2404-22	22	2024-01-31	2024	Winter	1	B	4	4 -5 years	46	>24months	F	16/04/2020	Charolaise	Subclinical	42	pos	pos	pos	pos	neg	16S-Mex-CMh-	DI	5	17.41	28.24	29.83	34.17	0	NE	1300	1530	non-quantifiable	0	NE	3.11394	3.18469	non-quantifiable	neg	Ext, Robot IDVET	09/04/2024	69	50-100 d	36	0-50 d	105	100-200 d	MAG FAST768: 034	80 µl	neat
2408-22	22	2024-01-31	2024	Winter	1	B	4	4 -5 years	46	>24months	F	17/04/2020	Charolaise	Subclinical	42	pos	pos	neg	pos	neg	16S-CMh-	MI	5	17.89	27.33	0	26.48	0	NE	2000	0	863	0	NE	3.30103	neg	2.93601	neg	Ext, Robot IDVET	09/04/2024	69	50-100 d	36	0-50 d	105	100-200 d	MAG FAST768: 034	80 µl	neat
2726-22	22	2024-01-31	2024	Winter	1	B	3	3 years	40	>24months	F	05/10/2020	Charolaise	Subclinical	42	pos	pos	pos	pos	neg	16S-Mex-CMh-	DI	5	16.11	28.43	29.96	34.3	0	NE	1200	1430	non-quantifiable	0	NE	3.07918	3.15534	non-quantifiable	neg	Ext, Robot IDVET	09/04/2024	69	50-100 d	36	0-50 d	105	100-200 d	MAG FAST768: 034	80 µl	neat
4013-22	22	2024-01-31	2024	Winter	1	B	3	3 years	34	>24months	F	10/04/2021	Limousine	Subclinical	42	pos	pos	pos	pos	neg	16S-Mex-CMh-	DI	5	17.18	28.87	35.01	28.55	0	NE	970	non-quantifiable	173	0	NE	2.98677	non-quantifiable	2.23805	neg	Ext, Robot IDVET	09/04/2024	69	50-100 d	36	0-50 d	105	100-200 d	MAG FAST768: 034	80 µl	neat
5390-22	22	2024-01-31	2024	Winter	1	B	3	3 years	33	>24months	F	20/05/2021	Limousine	Subclinical	42	pos	pos	pos	neg	neg	16S-Mex-	MI	5	17.07	33.61	34.23	0	0	NE	100	non-quantifiable	0	0	NE	2	non-quantifiable	neg	neg	Ext, Robot IDVET	09/04/2024	69	50-100 d	36	0-50 d	105	100-200 d	MAG FAST768: 034	80 µl	neat
5391-22	22	2024-01-31	2024	Winter	1	B	3	3 years	33	>24months	F	25/05/2021	Limousine	Subclinical	42	pos	pos	pos	neg	neg	16S-Mex-	MI	5	17.21	32.84	34.32	0	0	NE	150	non-quantifiable	0	0	NE	2.17609	non-quantifiable	neg	neg	Ext, Robot IDVET	09/04/2024	69	50-100 d	36	0-50 d	105	100-200 d	MAG FAST768: 034	80 µl	neat
5393-22	22	2024-01-31	2024	Winter	1	B	2	2 years	27	>24months	F	25/11/2021	Limousine	Subclinical	42	pos	neg	neg	neg	neg	NI	NI	5	16.74	0	0	0	0	NE	0	0	0	0	NE	neg	neg	neg	neg	Ext. Robot IDVET	09/04/2024	69	50-100 d	36	0-50 d	105	100-200 d	MAG FAST768: 034	80 µl	neat
5394-22	22	2024-01-31	2024	Winter	1	B	2	2 years	26	>24months	F	02/12/2021	Limousine	Subclinical	42	pos	pos	neg	pos	neg	16S-CMh-	MI	5	16.73	28.14	0	27.35	0	NE	1400	0	439	0	NE	3.14613	neg	2.64246	neg	Ext, Robot IDVET	09/04/2024	69	50-100 d	36	0-50 d	105	100-200 d	MAG FAST768: 034	80 µl	neat
7458-22	22	2024-01-31	2024	Winter	1	B	3	3 years	41	>24months	F	30/09/2020	Limousine	Subclinical	42	pos	pos	neg	pos	neg	16S-CMh-	MI	5	16.32	28.34	0	27.12	0	NE	1200	0	525	0	NE	3.07918	neg	2.72016	neg	Ext, Robot IDVET	09/04/2024	69	50-100 d	36	0-50 d	105	100-200 d	MAG FAST768: 034	80 µl	neat
751-22	22	2024-01-31	2024	Winter	1	B	9	> 5 years	113	>24months	F	25/10/2014	Salers	Subclinical	42	pos	pos	neg	pos	neg	16S-CMh-	MI	5	17.43	29.04	0	27.86	0	NE	890	0	296	0	NE	2.94939	neg	2.47129	neg	Ext, Robot IDVET	09/04/2024	69	50-100 d	36	0-50 d	105	100-200 d	MAG FAST768: 034	80 µl	neat
1534-23	23	2024-02-14	2024	Winter	2	B	4	4 -5 years	43	>24months	F	09/08/2020	Limousine	Subclinical	42	pos	pos	pos	pos	pos	16S-Mex-CMh-Mass	TI	5	17.11	26.45	28.63	34.65	27.61	NE	190000	2220	non-quantifiable	2110	NE	5.27875	3.34635	non-quantifiable	3.32428	Ext, Robot IDVET	03/05/2024	79	50-100 d	20	0-50 d	99	0-100 d	MAG FAST768: 034	80 µl	neat
1536-23	23	2024-02-14	2024	Winter	2	B	4	4 -5 years	43	>24months	F	09/08/2020	Limousine	Subclinical	42	pos	pos	pos	neg	neg	16S-Mex-	MI	5	16.9	27.55	28	0	0	NE	97000	3210	0	0	NE	4.98677	3.50651	neg	neg	Ext, Robot IDVET	03/05/2024	79	50-100 d	20	0-50 d	99	0-100 d	MAG FAST768: 034	80 µl	neat
1550-23	23	2024-02-14	2024	Winter	2	B	3	3 years	42	>24months	F	24/08/2020	Limousine	Subclinical	42	pos	pos	neg	pos	neg	16S-CMh-	MI	5	17.35	36.34	0	34.03	0	NE	non-quantifiable	0	non-quantifiable	0	NE	non-quantifiable	neg	non-quantifiable	neg	Ext. Robot IDVET	03/05/2024	79	50-100 d	20	0-50 d	99	0-100 d	MAG FAST768: 034	80 µl	neat
3097-23	23	2024-02-14	2024	Winter	2	B	3	3 years	31	>24months	F	13/08/2021	Limousine	Subclinical	42	pos	pos	pos	pos	neg	16S-Mex-CMh-	DI	5	15.68	30.57	30.62	28.32	0	NE	15000	698	614	0	NE	4.17609	2.84386	2.78817	neg	Ext, Robot IDVET	03/05/2024	79	50-100 d	20	0-50 d	99	0-100 d	MAG FAST768: 034	80 µl	neat
3101-23	23	2024-02-14	2024	Winter	2	B	2	2 years	30	>24months	F	17/08/2021	Limousine	Subclinical	42	pos	pos	pos	pos	neg	16S-Mex-CMh-	DI	5	16.9	29.59	29.67	28.01	0	NE	28000	1210	783	0	NE	4.44716	3.08279	2.89376	neg	Ext, Robot IDVET	03/05/2024	79	50-100 d	20	0-50 d	99	0-100 d	MAG FAST768: 034	80 µl	neat
3107-23	23	2024-02-14	2024	Winter	2	B	2	2 years	30	>24months	F	24/08/2021	Limousine	Subclinical	42	pos	pos	pos	pos	neg	16S-Mex-CMh-	DI	5	15.77	27.85	27.26	26.1	0	NE	81000	4930	3510	0	NE	4.90849	3.69285	3.54531	neg	Ext, Robot IDVET	03/05/2024	79	50-100 d	20	0-50 d	99	0-100 d	MAG FAST768: 034	80 µl	neat
4880-23	23	2024-02-14	2024	Winter	2	B	11	> 5 years	128	>24months	F	13/08/2013	Limousine	Subclinical	42	pos	pos	pos	pos	neg	16S-Mex-CMh-	DI	5	16.24	36.06	34.84	34.45	0	NE	non-quantifiable	non-quantifiable	non-quantifiable	0	NE	non-quantifiable	non-quantifiable	non-quantifiable	neg	Ext. Robot IDVET	03/05/2024	79	50-100 d	20	0-50 d	99	0-100 d	MAG FAST768: 034	80 µl	neat
4957-23	23	2024-02-14	2024	Winter	2	B	8	> 5 years	91	>24months	F	13/08/2016	Limousine	Subclinical	42	pos	pos	pos	pos	neg	16S-Mex-CMh-	DI	5	18.03	32.42	32.03	32.83	0	NE	4800	307	non-quantifiable	0	NE	3.68124	2.48714	non-quantifiable	neg	Ext, Robot IDVET	03/05/2024	79	50-100 d	20	0-50 d	99	0-100 d	MAG FAST768: 034	80 µl	neat
4959-23	23	2024-02-14	2024	Winter	2	B	8	> 5 years	91	>24months	F	16/08/2016	Limousine	Subclinical	42	pos	pos	pos	pos	neg	16S-Mex-CMh-	DI	5	16.47	34.49	33.94	34.11	0	NE	1300	non-quantifiable	non-quantifiable	0	NE	3.11394	non-quantifiable	non-quantifiable	neg	Ext, Robot IDVET	03/05/2024	79	50-100 d	20	0-50 d	99	0-100 d	MAG FAST768: 034	80 µl	neat
8589-23	23	2024-02-14	2024	Winter	2	B	5	4 -5 years	61	>24months	M	28/01/2019	Limousine	Subclinical	42	pos	pos	pos	pos	neg	16S-Mex-CMh-	DI	5	17.02	33.36	35.46	30.37	0	NE	2700	non-quantifiable	123	0	NE	3.43136	non-quantifiable	2.08991	neg	Ext, Robot IDVET	03/05/2024	79	50-100 d	20	0-50 d	99	0-100 d	MAG FAST768: 034	80 µl	neat
9118-23	23	2024-02-14	2024	Winter	2	B	4	4 -5 years	54	>24months	F	06/09/2019	Limousine	Subclinical	42	pos	pos	pos	pos	neg	16S-Mex-CMh-	DI	5	16.53	31.72	31.42	34.17	0	NE	7400	438	non-quantifiable	0	NE	3.86923	2.64147	non-quantifiable	neg	Ext, Robot IDVET	03/05/2024	79	50-100 d	20	0-50 d	99	0-100 d	MAG FAST768: 034	80 µl	neat
1636-8	8	2024-12-09	2024	Winter	12	B	3	3 years	36	>24months	F	01/01/2022	Blonde d'Aquitaine	Subclinical	31	pos	pos	neg	neg	pos	16S-Mass	MI	5	22.04	33.13	0	0	34.49	NE	717	0	0	non-quantifiable	NE	2.85552	neg	neg	non-quantifiable	Ext, Robot IDVET	28/03/2025	109	>100 d	7	0-50 d	116	100-200 d	MAG FAST768: 034	80 µl	neat
2093-8	8	2024-12-09	2024	Winter	12	B	12	> 5 years	145	>24months	F	01/01/2013	Blonde d'Aquitaine	Subclinical	31	pos	neg	neg	neg	neg	NI	NI	5	23.1	0	0	0	0	NE	0	0	0	0	NE	neg	neg	neg	neg	Ext. Robot IDVET	28/03/2025	109	>100 d	7	0-50 d	116	100-200 d	MAG FAST768: 034	80 µl	neat
2263-8	8	2024-12-09	2024	Winter	12	B	3	3 years	36	>24months	F	01/01/2022	Blonde d'Aquitaine	Subclinical	31	pos	pos	pos	pos	neg	16S-Mex-CMh-	DI	5	22.64	21.08	33.19	33.19	0	NE	289000	non-quantifiable	29.3	0	NE	5.4609	non-quantifiable	1.46687	neg	Ext, Robot IDVET	28/03/2025	109	>100 d	7	0-50 d	116	100-200 d	MAG FAST768: 034	80 µl	neat
2273-8	8	2024-12-09	2024	Winter	12	B	3	3 years	36	>24months	F	01/01/2022	Blonde d'Aquitaine	Subclinical	31	pos	pos	pos	pos	pos	16S-Mex-CMh-Mass	TI	5	22.95	28.95	28.03	28.03	34.43	NE	5740	1090000	271	non-quantifiable	NE	3.75891	6.03743	2.43297	non-quantifiable	Ext, Robot IDVET	28/03/2025	109	>100 d	7	0-50 d	116	100-200 d	MAG FAST768: 034	80 µl	neat
2278-8	8	2024-12-09	2024	Winter	12	B	3	3 years	36	>24months	F	01/01/2022	Blonde d'Aquitaine	Subclinical	31	pos	pos	pos	pos	pos	16S-Mex-CMh-Mass	TI	5	22.61	26.66	24.71	24.71	32.87	NE	18000	1650000000	1140	441	NE	4.25527	9.21748	3.0569	2.64444	Ext, Robot IDVET	28/03/2025	109	>100 d	7	0-50 d	116	100-200 d	MAG FAST768: 034	80 µl	neat
228-8	8	2024-12-09	2024	Winter	12	B	15	> 5 years	182	>24months	F	01/01/2010	Blonde d'Aquitaine	Subclinical	31	pos	pos	pos	pos	neg	16S-Mex-CMh-	DI	5	23.13	32.34	34.95	34.95	0	NE	1060	non-quantifiable	13.7	0	NE	3.02531	non-quantifiable	1.13672	neg	Ext, Robot IDVET	28/03/2025	109	>100 d	7	0-50 d	116	100-200 d	MAG FAST768: 034	80 µl	neat
2295-8	8	2024-12-09	2024	Winter	12	B	1	0 -1 year	11	6-12 months	F	01/01/2024	Blonde d'Aquitaine	Subclinical	31	pos	pos	pos	neg	neg	16S-Mex-	MI	5	23.75	25.84	24.79	0	0	NE	12600	3620000	0	0	NE	4.10037	6.55871	neg	neg	Ext, Robot IDVET	28/03/2025	109	>100 d	7	0-50 d	116	100-200 d	MAG FAST768: 034	80 µl	neat
292-8	8	2024-12-09	2024	Winter	12	B	14	> 5 years	170	>24months	F	01/01/2011	Blonde d'Aquitaine	Subclinical	31	pos	pos	neg	neg	pos	16S-Mass	MI	5	24.23	31.9	0	0	32.86	NE	1320	0	0	444	NE	3.12057	neg	neg	2.64738	Ext, Robot IDVET	28/03/2025	109	>100 d	7	0-50 d	116	100-200 d	MAG FAST768: 034	80 µl	neat
3432-8	8	2024-12-09	2024	Winter	12	B	12	> 5 years	145	>24months	F	01/01/2013	Blonde d'Aquitaine	Subclinical	31	pos	pos	pos	pos	neg	16S-Mex-CMh-	DI	5	24.71	33.71	31.42	31.42	0	NE	537	610	62.8	0	NE	2.72997	2.78533	1.79796	neg	Ext, Robot IDVET	28/03/2025	109	>100 d	7	0-50 d	116	100-200 d	MAG FAST768: 034	80 µl	neat
3491-8	8	2024-12-09	2024	Winter	12	B	11	> 5 years	133	>24months	F	01/01/2014	Blonde d'Aquitaine	Subclinical	31	pos	pos	neg	pos	neg	16S-CMh-	MI	5	25.42	32.89	36.9	36.9	0	NE	808	0	5.9	0	NE	2.90741	neg	0.770852	neg	Ext, Robot IDVET	28/03/2025	109	>100 d	7	0-50 d	116	100-200 d	MAG FAST768: 034	80 µl	neat
3964-8	8	2024-12-09	2024	Winter	12	B	2	2 years	24	18 months-24 months	F	01/01/2023	Blonde d'Aquitaine	Subclinical	31	pos	pos	pos	neg	neg	16S-Mex-	MI	5	22.84	27.91	26.69	0	0	NE	4060	147000	0	0	NE	3.60853	5.16732	neg	neg	Ext, Robot IDVET	28/03/2025	109	>100 d	7	0-50 d	116	100-200 d	MAG FAST768: 034	80 µl	neat
3973-8	8	2024-12-09	2024	Winter	12	B	2	2 years	24	18 months-24 months	F	01/01/2023	Blonde d'Aquitaine	Subclinical	31	pos	pos	pos	pos	neg	16S-Mex-CMh-	DI	5	22.91	30.61	33.94	33.94	0	NE	2510	non-quantifiable	21.2	0	NE	3.39967	non-quantifiable	1.32634	neg	Ext, Robot IDVET	28/03/2025	109	>100 d	7	0-50 d	116	100-200 d	MAG FAST768: 034	80 µl	neat
3976-8	8	2024-12-09	2024	Winter	12	B	2	2 years	24	18 months-24 months	F	01/01/2023	Blonde d'Aquitaine	Subclinical	31	pos	pos	pos	pos	neg	16S-Mex-CMh-	DI	5	23.66	33.14	34.46	34.46	0	NE	714	non-quantifiable	16.9	0	NE	2.8537	non-quantifiable	1.22789	neg	Ext, Robot IDVET	28/03/2025	109	>100 d	7	0-50 d	116	100-200 d	MAG FAST768: 034	80 µl	neat
3979-8	8	2024-12-09	2024	Winter	12	B	1	0 -1 year	11	6-12 months	F	01/01/2024	Blonde d'Aquitaine	Subclinical	31	pos	pos	pos	pos	neg	16S-Mex-CMh-	DI	5	24.96	25.04	22.67	22.67	0	NE	40200	149000000000	2740	0	NE	4.60423	11.1732	3.43775	neg	Ext, Robot IDVET	28/03/2025	109	>100 d	7	0-50 d	116	100-200 d	MAG FAST768: 034	80 µl	neat
3980-8	8	2024-12-09	2024	Winter	12	B	2	2 years	24	18 months-24 months	F	01/01/2023	Blonde d'Aquitaine	Subclinical	31	pos	pos	pos	pos	neg	16S-Mex-CMh-	DI	5	21.29	25.64	32.88	32.88	0	NE	29800	24.3	33.5	0	NE	4.47422	1.38561	1.52504	neg	Ext, Robot IDVET	28/03/2025	109	>100 d	7	0-50 d	116	100-200 d	MAG FAST768: 034	80 µl	neat
4565-8	8	2024-12-09	2024	Winter	12	B	11	> 5 years	133	>24months	F	01/01/2014	Blonde d'Aquitaine	Subclinical	31	pos	pos	pos	neg	neg	16S-Mex-	MI	5	22.24	32.87	31.37	0	0	NE	267	55.3	0	0	NE	2.42651	1.74273	neg	neg	Ext, Robot IDVET	28/03/2025	109	>100 d	7	0-50 d	116	100-200 d	MAG FAST768: 034	80 µl	neat
4570-8	8	2024-12-09	2024	Winter	12	B	11	> 5 years	133	>24months	F	01/01/2014	Blonde d'Aquitaine	Subclinical	31	pos	pos	neg	neg	pos	16S-Mass	MI	5	25.06	30.79	0	0	33.79	NE	2300	0	0	non-quantifiable	NE	3.36173	neg	neg	non-quantifiable	Ext, Robot IDVET	28/03/2025	109	>100 d	7	0-50 d	116	100-200 d	MAG FAST768: 034	80 µl	neat
484-8	8	2024-12-09	2024	Winter	12	B	14	> 5 years	170	>24months	F	01/01/2011	Blonde d'Aquitaine	Subclinical	31	pos	neg	neg	neg	neg	NI	NI	5	22.24	40.76	0	0	0	NE	0	0	0	0	NE	neg	neg	neg	neg	Ext. Robot IDVET	28/03/2025	109	>100 d	7	0-50 d	116	100-200 d	MAG FAST768: 034	80 µl	neat
4842-8	8	2024-12-09	2024	Winter	12	B	2	2 years	24	18 months-24 months	F	01/01/2023	Blonde d'Aquitaine	Subclinical	31	pos	pos	pos	pos	neg	16S-Mex-CMh-	DI	5	23.7	28.56	26.01	26.01	0	NE	6970	93800000	649	0	NE	3.84323	7.9722	2.81224	neg	Ext, Robot IDVET	28/03/2025	109	>100 d	7	0-50 d	116	100-200 d	MAG FAST768: 034	80 µl	neat
5502-8	8	2024-12-09	2024	Winter	12	B	10	> 5 years	121	>24months	F	01/01/2015	Blonde d'Aquitaine	Subclinical	31	pos	pos	pos	neg	neg	16S-Mex-	MI	5	24.16	34.41	32.79	0	0	NE	115	5.05	0	0	NE	2.0607	0.703291	neg	neg	Ext, Robot IDVET	28/03/2025	109	>100 d	7	0-50 d	116	100-200 d	MAG FAST768: 034	80 µl	neat
5506-8	8	2024-12-09	2024	Winter	12	B	10	> 5 years	121	>24months	F	01/01/2015	Blonde d'Aquitaine	Subclinical	31	pos	pos	pos	neg	neg	16S-Mex-	MI	5	22.99	31.1	30.92	0	0	NE	704	118	0	0	NE	2.84757	2.07188	neg	neg	Ext, Robot IDVET	28/03/2025	109	>100 d	7	0-50 d	116	100-200 d	MAG FAST768: 034	80 µl	neat
5514-8	8	2024-12-09	2024	Winter	12	B	10	> 5 years	121	>24months	F	01/01/2015	Blonde d'Aquitaine	Subclinical	31	pos	pos	pos	pos	neg	16S-Mex-CMh-	DI	5	21.95	34.12	30.66	30.66	0	NE	438	3270	87.2	0	NE	2.64147	3.51455	1.94052	neg	Ext, Robot IDVET	28/03/2025	109	>100 d	7	0-50 d	116	100-200 d	MAG FAST768: 034	80 µl	neat
588-8	8	2024-12-09	2024	Winter	12	B	3	3 years	36	>24months	F	01/01/2022	Blonde d'Aquitaine	Subclinical	31	pos	pos	pos	pos	neg	16S-Mex-CMh-	DI	5	24.02	27.4	33.15	33.15	0	NE	12400	non-quantifiable	29.8	0	NE	4.09342	non-quantifiable	1.47422	neg	Ext, Robot IDVET	28/03/2025	109	>100 d	7	0-50 d	116	100-200 d	MAG FAST768: 034	80 µl	neat
1402-35	35	2024-02-13	2024	Winter	2	B	11	> 5 years	139	>24months	F	12/09/2012	Limousine	Subclinical	42	pos	pos	neg	neg	neg	16S-	unknown	5	16.57	35.54	0	0	0	NE	non-quantifiable	0	0	0	NE	non-quantifiable	neg	neg	neg	Ext. Robot IDVET	03/05/2024	80	50-100 d	20	0-50 d	100	0-100 d	MAG FAST768: 034	80 µl	neat
1533-35	35	2024-02-13	2024	Winter	2	B	5	4 -5 years	65	>24months	F	14/10/2018	Limousine	Subclinical	42	pos	pos	pos	pos	neg	16S-Mex-CMh-	DI	5	16.74	34.14	34.61	35.88	0	NE	1700	non-quantifiable	non-quantifiable	0	NE	3.23045	non-quantifiable	non-quantifiable	neg	Ext, Robot IDVET	03/05/2024	80	50-100 d	20	0-50 d	100	0-100 d	MAG FAST768: 034	80 µl	neat
2681-35	35	2024-02-13	2024	Winter	2	B	10	> 5 years	126	>24months	F	30/09/2013	Limousine	Subclinical	42	pos	pos	pos	pos	neg	16S-Mex-CMh-	DI	5	16.4	33.83	34.54	34.18	0	NE	2000	non-quantifiable	non-quantifiable	0	NE	3.30103	non-quantifiable	non-quantifiable	neg	Ext, Robot IDVET	03/05/2024	80	50-100 d	20	0-50 d	100	0-100 d	MAG FAST768: 034	80 µl	neat
5006-35	35	2024-02-13	2024	Winter	2	B	2	2 years	29	>24months	F	17/09/2021	Limousine	Subclinical	42	pos	pos	pos	pos	neg	16S-Mex-CMh-	DI	5	16.09	26.52	25.46	35.85	0	NE	180000	14100	non-quantifiable	0	NE	5.25527	4.14922	non-quantifiable	neg	Ext, Robot IDVET	03/05/2024	80	50-100 d	20	0-50 d	100	0-100 d	MAG FAST768: 034	80 µl	neat
1570-29	29	2024-02-20	2024	Winter	2	B	7	> 5 years	86	>24months	F	10/02/2017	Ferrandaise	Subclinical	42	pos	pos	neg	neg	neg	16S-	unknown	5	18.71	37.21	0	0	0	NE	non-quantifiable	0	0	0	NE	non-quantifiable	neg	neg	neg	Ext. Robot IDVET	07/05/2024	77	50-100 d	27	0-50 d	104	100-200 d	MAG FAST768: 034	80 µl	neat
3848-29	29	2024-02-20	2024	Winter	2	B	2	2 years	25	>24months	F	07/02/2022	Ferrandaise	Subclinical	42	pos	pos	pos	neg	neg	16S-Mex-	MI	5	20.48	25.65	25.84	0	0	NE	37000	11300	0	0	NE	4.5682	4.05308	neg	neg	Ext, Robot IDVET	07/05/2024	77	50-100 d	27	0-50 d	104	100-200 d	MAG FAST768: 034	80 µl	neat
6743-29	29	2024-02-20	2024	Winter	2	B	5	4 -5 years	59	>24months	F	07/04/2019	Ferrandaise	Subclinical	42	pos	pos	pos	pos	neg	16S-Mex-CMh-	DI	5	19.87	30.68	34.35	28.34	0	NE	18000	non-quantifiable	231	0	NE	4.25527	non-quantifiable	2.36361	neg	Ext, Robot IDVET	07/05/2024	77	50-100 d	27	0-50 d	104	100-200 d	MAG FAST768: 034	80 µl	neat
6744-29	29	2024-02-20	2024	Winter	2	B	5	4 -5 years	59	>24months	F	01/05/2019	Ferrandaise	Subclinical	42	pos	pos	pos	neg	neg	16S-Mex-	MI	5	20.12	32.62	32.46	36.07	0	NE	11000	66	0	0	NE	4.04139	1.81954	neg	neg	Ext, Robot IDVET	07/05/2024	77	50-100 d	27	0-50 d	104	100-200 d	MAG FAST768: 034	80 µl	neat
6745-29	29	2024-02-20	2024	Winter	2	B	4	4 -5 years	50	>24months	F	07/01/2020	Ferrandaise	Subclinical	42	pos	pos	neg	pos	neg	16S-CMh-	MI	5	20.06	28.85	0	26.09	0	NE	25000	0	1570	0	NE	4.39794	neg	3.1959	neg	Ext, Robot IDVET	07/05/2024	77	50-100 d	27	0-50 d	104	100-200 d	MAG FAST768: 034	80 µl	neat
687-29	29	2024-02-20	2024	Winter	2	B	3	3 years	38	>24months	F	02/01/2021	Ferrandaise	Subclinical	42	pos	neg	neg	pos	neg	CMh-	unknown	5	18.74	38.87	0	34.79	0	NE	0	0	non-quantifiable	0	NE	neg	neg	non-quantifiable	neg	Ext. Robot IDVET	07/05/2024	77	50-100 d	27	0-50 d	104	100-200 d	MAG FAST768: 034	80 µl	neat
6898-29	29	2024-02-20	2024	Winter	2	B	8	> 5 years	98	>24months	F	07/02/2016	Ferrandaise	Subclinical	42	pos	pos	neg	neg	neg	16S-	unknown	5	18.69	37.22	0	0	0	NE	non-quantifiable	0	0	0	NE	non-quantifiable	neg	neg	neg	Ext. Robot IDVET	07/05/2024	77	50-100 d	27	0-50 d	104	100-200 d	MAG FAST768: 034	80 µl	neat
754-29	29	2024-02-20	2024	Winter	2	B	9	> 5 years	104	>24months	F	07/08/2015	Ferrandaise	Subclinical	42	pos	pos	pos	neg	neg	16S-Mex-	MI	5	19.95	34.57	32.53	0	0	NE	3400	62.5	0	0	NE	3.53148	1.79588	neg	neg	Ext, Robot IDVET	07/05/2024	77	50-100 d	27	0-50 d	104	100-200 d	MAG FAST768: 034	80 µl	neat
7684-29	29	2024-02-20	2024	Winter	2	B	3	3 years	38	>24months	F	09/01/2021	Ferrandaise	Subclinical	42	pos	pos	pos	pos	neg	16S-Mex-CMh-	DI	5	19.01	31.94	31.64	35.67	0	NE	13000	125	non-quantifiable	0	NE	4.11394	2.09691	non-quantifiable	neg	Ext, Robot IDVET	07/05/2024	77	50-100 d	27	0-50 d	104	100-200 d	MAG FAST768: 034	80 µl	neat
940-29	29	2024-02-20	2024	Winter	2	B	14	> 5 years	171	>24months	F	14/02/2010	Ferrandaise	Subclinical	42	pos	pos	pos	neg	neg	16S-Mex-	MI	5	19.5	35.12	32.55	0	0	NE	non-quantifiable	61.5	0	0	NE	non-quantifiable	1.7888751157754168	neg	neg	Ext. Robot IDVET	07/05/2024	77	50-100 d	27	0-50 d	104	100-200 d	MAG FAST768: 034	80 µl	neat
994-29	29	2024-02-20	2024	Winter	2	B	5	4 -5 years	66	>24months	F	08/09/2018	Ferrandaise	Subclinical	42	pos	pos	pos	neg	neg	16S-Mex-	MI	5	20.19	36.95	35.75	0	0	NE	non-quantifiable	non-quantifiable	0	0	NE	non-quantifiable	non-quantifiable	neg	neg	Ext. Robot IDVET	07/05/2024	77	50-100 d	27	0-50 d	104	100-200 d	MAG FAST768: 034	80 µl	neat
9979-29	29	2024-02-20	2024	Winter	2	B	15	> 5 years	184	>24months	F	06/01/2009	Ferrandaise	Subclinical	42	pos	pos	pos	neg	neg	16S-Mex-	MI	5	20.12	30.91	29.62	0	0	NE	17000	599	0	0	NE	4.23045	2.77743	neg	neg	Ext, Robot IDVET	07/05/2024	77	50-100 d	27	0-50 d	104	100-200 d	MAG FAST768: 034	80 µl	neat
1331-30	30	2024-11-26	2024	Automn	11	B	4	4 -5 years	48	>24months	F	01/01/2021	Blonde d'Aquitaine	Subclinical	31	pos	pos	pos	pos	pos	16S-Mex-CMh-Mass	TI	5	23.69	29.34	26.75	26.75	33.73	NE	4730	18300000	472	non-quantifiable	NE	3.67486	7.26245	2.67394	non-quantifiable	Ext, Robot IDVET	28/03/2025	122	>100 d	7	0-50 d	129	100-200 d	MAG FAST768: 034	80 µl	neat
1332-30	30	2024-11-26	2024	Automn	11	B	4	4 -5 years	48	>24months	F	01/01/2021	Blonde d'Aquitaine	Subclinical	31	pos	pos	neg	neg	pos	16S-Mass	MI	5	23.79	33.25	0	0	33.31	NE	676	0	0	non-quantifiable	NE	2.82995	neg	neg	non-quantifiable	Ext, Robot IDVET	28/03/2025	122	>100 d	7	0-50 d	129	100-200 d	MAG FAST768: 034	80 µl	neat
1580-30	30	2024-11-26	2024	Automn	11	B	4	4 -5 years	48	>24months	F	01/01/2021	Blonde d'Aquitaine	Subclinical	31	pos	pos	pos	pos	neg	16S-Mex-CMh-	DI	5	21.43	31.01	27.23	27.23	0	NE	2060	6350000	383	0	NE	3.31387	6.80277	2.5832	neg	Ext, Robot IDVET	28/03/2025	122	>100 d	7	0-50 d	129	100-200 d	MAG FAST768: 034	80 µl	neat
2790-30	30	2024-11-26	2024	Automn	11	B	3	3 years	35	>24months	F	01/01/2022	Blonde d'Aquitaine	Subclinical	31	pos	pos	neg	neg	pos	16S-Mass	MI	5	24.4	35.43	0	0	35.08	NE	228	0	0	NE	NE	2.35793	neg	neg	NE	Ext, Robot IDVET	28/03/2025	122	>100 d	7	0-50 d	129	100-200 d	MAG FAST768: 034	80 µl	neat
2791-30	30	2024-11-26	2024	Automn	11	B	3	3 years	35	>24months	F	01/01/2022	Blonde d'Aquitaine	Subclinical	31	pos	neg	neg	neg	neg	NI	NI	5	22.99	0	0	0	0	NE	0	0	0	0	NE	neg	neg	neg	neg	Ext. Robot IDVET	28/03/2025	122	>100 d	7	0-50 d	129	100-200 d	MAG FAST768: 034	80 µl	neat
4587-30	30	2024-11-26	2024	Automn	11	B	16	> 5 years	194	>24months	F	01/01/2009	Blonde d'Aquitaine	Subclinical	31	pos	pos	pos	neg	neg	16S-Mex-	MI	5	23.6	33.81	33.4	0	0	NE	511	non-quantifiable	0	0	NE	2.70842	non-quantifiable	neg	neg	Ext, Robot IDVET	28/03/2025	122	>100 d	7	0-50 d	129	100-200 d	MAG FAST768: 034	80 µl	neat
548-30	30	2024-11-26	2024	Automn	11	B	6	> 5 years	72	>24months	F	01/01/2019	Blonde d'Aquitaine	Subclinical	31	pos	pos	neg	neg	neg	16S-	unknown	5	23.26	36.71	0	0	0	NE	non-quantifiable	0	0	0	NE	non-quantifiable	neg	neg	neg	Ext. Robot IDVET	28/03/2025	122	>100 d	7	0-50 d	129	100-200 d	MAG FAST768: 034	80 µl	neat
735-30	30	2024-11-26	2024	Automn	11	B	4	4 -5 years	48	>24months	F	01/01/2021	Blonde d'Aquitaine	Subclinical	31	pos	pos	pos	pos	neg	16S-Mex-CMh-	DI	5	23.66	34.02	30.13	30.13	0	NE	461	10500	110	0	NE	2.6637	4.02119	2.04139	neg	Ext, Robot IDVET	28/03/2025	122	>100 d	7	0-50 d	129	100-200 d	MAG FAST768: 034	80 µl	neat
7856-30	30	2024-11-26	2024	Automn	11	B	8	> 5 years	96	>24months	F	01/01/2017	Blonde d'Aquitaine	Subclinical	31	pos	pos	neg	neg	pos	16S-Mass	MI	5	22.67	26.75	0	0	33.18	NE	17200	0	0	non-quantifiable	NE	4.23553	neg	neg	non-quantifiable	Ext, Robot IDVET	28/03/2025	122	>100 d	7	0-50 d	129	100-200 d	MAG FAST768: 034	80 µl	neat
9915-30	30	2024-11-26	2024	Automn	11	B	6	> 5 years	72	>24months	F	01/01/2019	Blonde d'Aquitaine	Subclinical	31	pos	pos	pos	pos	neg	16S-Mex-CMh-	DI	5	24.28	32.28	29.78	29.78	0	NE	1100	22800	128	0	NE	3.04139	4.35793	2.10721	neg	Ext, Robot IDVET	28/03/2025	122	>100 d	7	0-50 d	129	100-200 d	MAG FAST768: 034	80 µl	neat
8828-36	36	2024-10-31	2024	Automn	10	B	2	2 years	19	18 months-24 months	M	15/04/2023	wagyu	clinical	9	pos	neg	neg	neg	neg	NI	NI	5	28.97	0	0	0	0	1040	0	0	0	0	3.0170333392987803	neg	neg	neg	neg	Ext, Robot IDVET	19/02/2025	111	>100 d	1	0-50 d	112	100-200 d	?	80 µl	neat
8829-36	36	2024-10-31	2024	Automn	10	B	2	2 years	19	18 months-24 months	M	21/04/2023	wagyu	clinical	9	pos	neg	neg	neg	neg	NI	NI	5	27.66	0	0	0	0	1880	0	0	0	0	3.27415784926368	neg	neg	neg	neg	Ext, Robot IDVET	19/02/2025	111	>100 d	1	0-50 d	112	100-200 d	?	80 µl	neat
1775-3	3	2025-01-04	2025	Winter	1	D	7	> 5 years	89	>24months	F	12/09/2017	HF	Subclinical	15	pos	pos	pos	neg	neg	16S-Mex-	MI	5	20.47	34.35	34.28	37.53	0	NE	85.4	non-quantifiable	0	0	NE	1.93146	non-quantifiable	neg	neg	Ext, Robot IDVET	26/03/2025	81	50-100 d	6	0-50 d	87	0-100 d	MAG FAST768: 034	80 µl	neat
1780-3	3	2025-01-04	2025	Winter	1	D	7	> 5 years	88	>24months	F	07/10/2017	HF	Subclinical	15	pos	pos	neg	neg	neg	16S-	unknown	5	21.54	36.19	0	36.66	0	NE	non-quantifiable	0	0	0	NE	non-quantifiable	neg	neg	neg	Ext. Robot IDVET	26/03/2025	81	50-100 d	6	0-50 d	87	0-100 d	MAG FAST768: 034	80 µl	neat
1785-3	3	2025-01-04	2025	Winter	1	D	7	> 5 years	87	>24months	F	11/11/2017	HF	Subclinical	15	pos	pos	pos	pos	neg	16S-Mex-CMh-	DI	5	19.77	32.41	32.2	34.72	0	NE	375	3.22	non-quantifiable	0	NE	2.57403	0.507856	non-quantifiable	neg	Ext, Robot IDVET	26/03/2025	81	50-100 d	6	0-50 d	87	0-100 d	MAG FAST768: 034	80 µl	neat
1787-3	3	2025-01-04	2025	Winter	1	D	7	> 5 years	87	>24months	F	20/11/2017	HF	Subclinical	15	pos	pos	pos	pos	pos	16S-Mex-CMh-Mass	TI	5	19.18	31.74	35.74	29.1	29.1	NE	1060	non-quantifiable	46.4	46.4	NE	3.02531	non-quantifiable	1.66652	1.66652	Ext, Robot IDVET	26/03/2025	81	50-100 d	6	0-50 d	87	0-100 d	MAG FAST768: 034	80 µl	neat
2575-3	3	2025-01-04	2025	Winter	1	D	6	> 5 years	77	>24months	F	27/08/2018	crossbred	Subclinical	15	pos	pos	neg	pos	neg	16S-CMh-	MI	5	22.07	34.91	0	35.81	36.63	NE	55.7	0	non-quantifiable	0	NE	1.74586	neg	non-quantifiable	neg	Ext, Robot IDVET	26/03/2025	81	50-100 d	6	0-50 d	87	0-100 d	MAG FAST768: 034	80 µl	neat
2576-3	3	2025-01-04	2025	Winter	1	D	6	> 5 years	77	>24months	F	04/09/2018	HF	Subclinical	15	pos	pos	pos	pos	neg	16S-Mex-CMh-	DI	5	19.96	32.1	30.11	35.27	0	NE	476	164	non-quantifiable	0	NE	2.67761	2.21484	non-quantifiable	neg	Ext, Robot IDVET	26/03/2025	81	50-100 d	6	0-50 d	87	0-100 d	MAG FAST768: 034	80 µl	neat
2580-3	3	2025-01-04	2025	Winter	1	D	6	> 5 years	76	>24months	F	15/10/2018	HF	Subclinical	15	pos	pos	neg	pos	neg	16S-CMh-	MI	5	20.6	33.7	0	30.15	0	NE	140	0	49.6	0	NE	2.14613	neg	1.69548	neg	Ext, Robot IDVET	26/03/2025	81	50-100 d	6	0-50 d	87	0-100 d	MAG FAST768: 034	80 µl	neat
2581-3	3	2025-01-04	2025	Winter	1	D	6	> 5 years	76	>24months	F	18/10/2018	HF	Subclinical	15	pos	pos	neg	pos	neg	16S-CMh-	MI	5	20.15	35.73	0	33.87	0	NE	non-quantifiable	0	non-quantifiable	0	NE	non-quantifiable	neg	non-quantifiable	neg	Ext. Robot IDVET	26/03/2025	81	50-100 d	6	0-50 d	87	0-100 d	MAG FAST768: 034	80 µl	neat
2583-3	3	2025-01-04	2025	Winter	1	D	6	> 5 years	75	>24months	F	28/10/2018	HF	Subclinical	15	pos	pos	neg	neg	neg	16S-	unknown	5	20.2	36.76	0	36.82	36.82	NE	non-quantifiable	0	0	0	NE	non-quantifiable	neg	neg	neg	Ext. Robot IDVET	26/03/2025	81	50-100 d	6	0-50 d	87	0-100 d	MAG FAST768: 034	80 µl	neat
2584-3	3	2025-01-04	2025	Winter	1	D	6	> 5 years	75	>24months	F	29/10/2018	HF	Subclinical	15	pos	pos	neg	pos	neg	16S-CMh-	MI	5	21.97	36.97	36.17	34.67	0	NE	non-quantifiable	0	non-quantifiable	0	NE	non-quantifiable	neg	non-quantifiable	neg	Ext. Robot IDVET	26/03/2025	81	50-100 d	6	0-50 d	87	0-100 d	MAG FAST768: 034	80 µl	neat
2587-3	3	2025-01-04	2025	Winter	1	D	6	> 5 years	75	>24months	F	19/11/2018	HF	Subclinical	15	pos	pos	pos	pos	pos	16S-Mex-CMh-Mass	TI	5	19.51	30	30.09	30.11	30.11	NE	2420	1070	14	14	NE	3.38382	3.02938	1.14613	1.14613	Ext, Robot IDVET	26/03/2025	81	50-100 d	6	0-50 d	87	0-100 d	MAG FAST768: 034	80 µl	neat
2589-3	3	2025-01-04	2025	Winter	1	D	6	> 5 years	74	>24months	F	14/12/2018	HF	Subclinical	15	pos	pos	neg	pos	neg	16S-CMh-	MI	5	18.76	37.66	0	35.35	35.35	NE	non-quantifiable	0	non-quantifiable	0	NE	non-quantifiable	neg	non-quantifiable	neg	Ext. Robot IDVET	26/03/2025	81	50-100 d	6	0-50 d	87	0-100 d	MAG FAST768: 034	80 µl	neat
2593-3	3	2025-01-04	2025	Winter	1	D	6	> 5 years	70	>24months	F	08/04/2019	HF	Subclinical	15	pos	pos	pos	pos	neg	16S-Mex-CMh-	DI	5	18.54	34.09	31.87	35.39	0	NE	104	5.99	non-quantifiable	0	NE	2.01703	0.777427	non-quantifiable	neg	Ext, Robot IDVET	26/03/2025	81	50-100 d	6	0-50 d	87	0-100 d	MAG FAST768: 034	80 µl	neat
2595-3	3	2025-01-04	2025	Winter	1	D	6	> 5 years	69	>24months	F	01/05/2019	HF	Subclinical	15	pos	pos	neg	pos	pos	16S-CMh-Mass	DI	5	19.15	30.36	0	30.58	31.03	NE	1800	0	33.8	2020	NE	3.25527	neg	1.52892	3.30535	Ext, Robot IDVET	26/03/2025	81	50-100 d	6	0-50 d	87	0-100 d	MAG FAST768: 034	80 µl	neat
2598-3	3	2025-01-04	2025	Winter	1	D	5	4 -5 years	66	>24months	F	10/08/2019	HF	Subclinical	15	pos	pos	neg	pos	pos	16S-CMh-Mass	DI	5	20.12	33.33	0	33.25	34.6	NE	186	0	non-quantifiable	non-quantifiable	NE	2.26951	neg	non-quantifiable	non-quantifiable	Ext, Robot IDVET	26/03/2025	81	50-100 d	6	0-50 d	87	0-100 d	MAG FAST768: 034	80 µl	neat
2601-3	3	2025-01-04	2025	Winter	1	D	5	4 -5 years	65	>24months	F	24/08/2019	crossbred	Subclinical	15	pos	pos	neg	pos	pos	16S-CMh-Mass	DI	5	18.81	32.92	0	29.74	29.74	NE	606	0	21.7	21.7	NE	2.78247	neg	1.33646	1.33646	Ext, Robot IDVET	26/03/2025	81	50-100 d	6	0-50 d	87	0-100 d	MAG FAST768: 034	80 µl	neat
2602-3	3	2025-01-04	2025	Winter	1	D	5	4 -5 years	64	>24months	F	21/09/2019	HF	Subclinical	15	pos	pos	pos	pos	neg	16S-Mex-CMh-	DI	5	20.94	36.23	35.78	35.89	37.69	NE	non-quantifiable	non-quantifiable	non-quantifiable	0	NE	non-quantifiable	non-quantifiable	non-quantifiable	neg	Ext. Robot IDVET	26/03/2025	81	50-100 d	6	0-50 d	87	0-100 d	MAG FAST768: 034	80 µl	neat
2603-3	3	2025-01-04	2025	Winter	1	D	5	4 -5 years	64	>24months	F	30/09/2019	crossbred	Subclinical	15	pos	pos	pos	pos	neg	16S-Mex-CMh-	DI	5	20.46	33.57	32.49	35.41	0	NE	155	1.87	non-quantifiable	0	NE	2.19033	0.271842	non-quantifiable	neg	Ext, Robot IDVET	26/03/2025	81	50-100 d	6	0-50 d	87	0-100 d	MAG FAST768: 034	80 µl	neat
2604-3	3	2025-01-04	2025	Winter	1	D	5	4 -5 years	64	>24months	F	01/10/2019	HF	Subclinical	15	pos	pos	pos	pos	neg	16S-Mex-CMh-	DI	5	20.57	30.67	28.53	35.79	0	NE	1420	3200	non-quantifiable	0	NE	3.15229	3.50515	non-quantifiable	neg	Ext, Robot IDVET	26/03/2025	81	50-100 d	6	0-50 d	87	0-100 d	MAG FAST768: 034	80 µl	neat
2605-3	3	2025-01-04	2025	Winter	1	D	5	4 -5 years	63	>24months	F	10/11/2019	HF	Subclinical	15	pos	pos	pos	pos	neg	16S-Mex-CMh-	DI	5	21.62	33.1	35.31	30.32	0	NE	222	non-quantifiable	42.7	0	NE	2.34635	non-quantifiable	1.63043	neg	Ext, Robot IDVET	26/03/2025	81	50-100 d	6	0-50 d	87	0-100 d	MAG FAST768: 034	80 µl	neat
2607-3	3	2025-01-04	2025	Winter	1	D	5	4 -5 years	62	>24months	F	21/11/2019	HF	Subclinical	15	pos	pos	neg	pos	pos	16S-CMh-Mass	DI	5	19.17	32.11	0	32.69	32.69	NE	889	0	non-quantifiable	0.648	NE	2.9489	neg	non-quantifiable	0.1	Ext, Robot IDVET	26/03/2025	81	50-100 d	6	0-50 d	87	0-100 d	MAG FAST768: 034	80 µl	neat
2608-3	3	2025-01-04	2025	Winter	1	D	5	4 -5 years	62	>24months	F	23/11/2019	crossbred	Subclinical	15	pos	pos	neg	pos	pos	16S-CMh-Mass	DI	5	19.59	34.01	0	31.98	31.98	NE	361	0	non-quantifiable	1.51	NE	2.55751	neg	non-quantifiable	0.178977	Ext, Robot IDVET	26/03/2025	81	50-100 d	6	0-50 d	87	0-100 d	MAG FAST768: 034	80 µl	neat
2768-3	3	2025-01-04	2025	Winter	1	D	11	> 5 years	129	>24months	F	05/06/2014	HF	Subclinical	15	pos	pos	neg	neg	neg	16S-	unknown	5	19.75	37.88	0	36.11	0	NE	non-quantifiable	0	0	0	NE	non-quantifiable	neg	neg	neg	Ext. Robot IDVET	26/03/2025	81	50-100 d	6	0-50 d	87	0-100 d	MAG FAST768: 034	80 µl	neat
3115-3	3	2025-01-04	2025	Winter	1	D	10	> 5 years	121	>24months	F	26/01/2015	HF	Subclinical	15	pos	pos	neg	neg	neg	16S-	unknown	5	20.89	35.53	0	0	0	NE	176	0	0	0	NE	2.24551	neg	neg	neg	Ext, Robot IDVET	26/03/2025	81	50-100 d	6	0-50 d	87	0-100 d	MAG FAST768: 034	80 µl	neat
3949-3	3	2025-01-04	2025	Winter	1	D	5	4 -5 years	61	>24months	F	29/12/2019	HF	Subclinical	15	pos	pos	neg	neg	pos	16S-Mass	MI	5	19.79	31.22	0	37.39	31.73	NE	931	0	0	1310	NE	2.96895	neg	neg	3.11727	Ext, Robot IDVET	26/03/2025	81	50-100 d	6	0-50 d	87	0-100 d	MAG FAST768: 034	80 µl	neat
3958-3	3	2025-01-04	2025	Winter	1	D	5	4 -5 years	60	>24months	F	26/01/2020	HF	Subclinical	15	pos	pos	pos	pos	pos	16S-Mex-CMh-Mass	TI	5	20.88	30.77	30.03	34.13	34.13	NE	1680	1170	non-quantifiable	non-quantifiable	NE	3.22531	3.06819	non-quantifiable	non-quantifiable	Ext, Robot IDVET	26/03/2025	81	50-100 d	6	0-50 d	87	0-100 d	MAG FAST768: 034	80 µl	neat
3961-3	3	2025-01-04	2025	Winter	1	D	5	4 -5 years	60	>24months	F	01/02/2020	crossbred	Subclinical	15	pos	pos	pos	neg	neg	16S-Mex-	MI	5	18.21	36.7	35.76	36.43	0	NE	non-quantifiable	non-quantifiable	0	0	NE	non-quantifiable	non-quantifiable	neg	neg	Ext. Robot IDVET	26/03/2025	81	50-100 d	6	0-50 d	87	0-100 d	MAG FAST768: 034	80 µl	neat
3962-3	3	2025-01-04	2025	Winter	1	D	5	4 -5 years	60	>24months	F	05/02/2020	HF	Subclinical	15	pos	pos	pos	pos	pos	16S-Mex-CMh-Mass	TI	5	19.84	32.79	32.06	34.36	34.36	NE	644	51.5	non-quantifiable	non-quantifiable	NE	2.80889	1.71181	non-quantifiable	non-quantifiable	Ext, Robot IDVET	26/03/2025	81	50-100 d	6	0-50 d	87	0-100 d	MAG FAST768: 034	80 µl	neat
3964-3	3	2025-01-04	2025	Winter	1	D	5	4 -5 years	59	>24months	F	16/02/2020	HF	Subclinical	15	pos	pos	pos	pos	pos	16S-Mex-CMh-Mass	TI	5	19.48	29.72	28.96	32.65	31.1	NE	2930	1430	non-quantifiable	1930	NE	3.46687	3.15534	non-quantifiable	3.28556	Ext, Robot IDVET	26/03/2025	81	50-100 d	6	0-50 d	87	0-100 d	MAG FAST768: 034	80 µl	neat
3966-3	3	2025-01-04	2025	Winter	1	D	5	4 -5 years	59	>24months	F	28/02/2020	HF	Subclinical	15	pos	pos	pos	pos	pos	16S-Mex-CMh-Mass	TI	5	20.06	32.48	30.82	31.84	31.84	NE	746	348	1.78	1.78	NE	2.87274	2.54158	0.25042	0.25042	Ext, Robot IDVET	26/03/2025	81	50-100 d	6	0-50 d	87	0-100 d	MAG FAST768: 034	80 µl	neat
4013-3	3	2025-01-04	2025	Winter	1	D	9	> 5 years	113	>24months	F	13/09/2015	HF	Subclinical	15	pos	neg	neg	neg	neg	NI	NI	5	20.09	0	0	0	0	NE	0	0	0	0	NE	neg	neg	neg	neg	Ext. Robot IDVET	26/03/2025	81	50-100 d	6	0-50 d	87	0-100 d	MAG FAST768: 034	80 µl	neat
4014-3	3	2025-01-04	2025	Winter	1	D	9	> 5 years	113	>24months	F	17/09/2015	HF	Subclinical	15	pos	pos	neg	pos	neg	16S-CMh-	MI	5	19.84	34.23	0	33.02	0	NE	93.6	0	non-quantifiable	0	NE	1.97128	neg	non-quantifiable	neg	Ext, Robot IDVET	26/03/2025	81	50-100 d	6	0-50 d	87	0-100 d	MAG FAST768: 034	80 µl	neat
4033-3	3	2025-01-04	2025	Winter	1	D	9	> 5 years	104	>24months	F	09/06/2016	HF	Subclinical	15	pos	pos	neg	neg	pos	16S-Mass	MI	5	20.17	29.93	0	0	29.98	NE	1340	0	0	2930	NE	3.1271	neg	neg	3.46687	Ext, Robot IDVET	26/03/2025	81	50-100 d	6	0-50 d	87	0-100 d	MAG FAST768: 034	80 µl	neat
4522-3	3	2025-01-04	2025	Winter	1	D	4	4 -5 years	53	>24months	F	21/08/2020	HF	Subclinical	15	pos	pos	neg	pos	neg	16S-CMh-	MI	5	19.01	35.15	0	32.13	0	NE	non-quantifiable	0	non-quantifiable	0	NE	non-quantifiable	neg	non-quantifiable	neg	Ext. Robot IDVET	26/03/2025	81	50-100 d	6	0-50 d	87	0-100 d	MAG FAST768: 034	80 µl	neat
4523-3	3	2025-01-04	2025	Winter	1	D	4	4 -5 years	53	>24months	F	21/08/2020	HF	Subclinical	15	pos	pos	pos	pos	pos	16S-Mex-CMh-Mass	TI	5	20.31	30.14	31.72	29.27	29.27	NE	2260	86.9	37.9	37.9	NE	3.35411	1.93902	1.57864	1.57864	Ext, Robot IDVET	26/03/2025	81	50-100 d	6	0-50 d	87	0-100 d	MAG FAST768: 034	80 µl	neat
4525-3	3	2025-01-04	2025	Winter	1	D	4	4 -5 years	53	>24months	F	31/08/2020	HF	Subclinical	15	pos	pos	pos	neg	neg	16S-Mex-	MI	5	19.6	32.26	30.22	37.57	36.65	NE	421	133	0	0	NE	2.62428	2.12385	neg	neg	Ext, Robot IDVET	26/03/2025	81	50-100 d	6	0-50 d	87	0-100 d	MAG FAST768: 034	80 µl	neat
4526-3	3	2025-01-04	2025	Winter	1	D	4	4 -5 years	53	>24months	F	31/08/2020	HF	Subclinical	15	pos	pos	pos	pos	pos	16S-Mex-CMh-Mass	TI	5	19.44	29.55	29.22	31.29	31.29	NE	2990	4090	non-quantifiable	3.43	NE	3.47567	3.61172	non-quantifiable	0.535294	Ext, Robot IDVET	26/03/2025	81	50-100 d	6	0-50 d	87	0-100 d	MAG FAST768: 034	80 µl	neat
4527-3	3	2025-01-04	2025	Winter	1	D	4	4 -5 years	52	>24months	F	20/09/2020	HF	Subclinical	15	pos	pos	pos	pos	pos	16S-Mex-CMh-Mass	TI	5	20.19	30.74	30.82	29.78	29.78	NE	1700	348	20.7	20.7	NE	3.23045	2.54158	1.31597	1.31597	Ext, Robot IDVET	26/03/2025	81	50-100 d	6	0-50 d	87	0-100 d	MAG FAST768: 034	80 µl	neat
4529-3	3	2025-01-04	2025	Winter	1	D	4	4 -5 years	52	>24months	F	28/09/2020	HF	Subclinical	15	pos	pos	pos	neg	neg	16S-Mex-	MI	5	19.47	30.33	29.04	36.69	0	NE	1840	1230	0	0	NE	3.26482	3.08991	neg	neg	Ext, Robot IDVET	26/03/2025	81	50-100 d	6	0-50 d	87	0-100 d	MAG FAST768: 034	80 µl	neat
4530-3	3	2025-01-04	2025	Winter	1	D	4	4 -5 years	52	>24months	F	30/09/2020	HF	Subclinical	15	pos	pos	pos	pos	neg	16S-Mex-CMh-	DI	5	19.75	34.16	35.7	30.76	0	NE	98.7	non-quantifiable	28.8	0	NE	1.99432	non-quantifiable	1.45939	neg	Ext, Robot IDVET	26/03/2025	81	50-100 d	6	0-50 d	87	0-100 d	MAG FAST768: 034	80 µl	neat
4534-3	3	2025-01-04	2025	Winter	1	D	4	4 -5 years	51	>24months	F	28/10/2020	crossbred	Subclinical	15	pos	pos	pos	pos	pos	16S-Mex-CMh-Mass	TI	5	20.23	35.9	35.46	34.8	34.8	NE	non-quantifiable	non-quantifiable	non-quantifiable	0.1	NE	non-quantifiable	non-quantifiable	non-quantifiable	0.1	Ext. Robot IDVET	26/03/2025	81	50-100 d	6	0-50 d	87	0-100 d	MAG FAST768: 034	80 µl	neat
4535-3	3	2025-01-04	2025	Winter	1	D	4	4 -5 years	51	>24months	F	29/10/2020	crossbred	Subclinical	15	pos	pos	pos	pos	pos	16S-Mex-CMh-Mass	TI	5	20.3	29.82	29.49	29.68	29.68	NE	2630	2700	23.3	23.3	NE	3.41996	3.43136	1.36736	1.36736	Ext, Robot IDVET	26/03/2025	81	50-100 d	6	0-50 d	87	0-100 d	MAG FAST768: 034	80 µl	neat
4536-3	3	2025-01-04	2025	Winter	1	D	4	4 -5 years	51	>24months	F	09/11/2020	HF	Subclinical	15	pos	pos	neg	pos	neg	16S-CMh-	MI	5	18.91	36.65	0	32.61	0	NE	non-quantifiable	0	non-quantifiable	0	NE	non-quantifiable	neg	non-quantifiable	neg	Ext. Robot IDVET	26/03/2025	81	50-100 d	6	0-50 d	87	0-100 d	MAG FAST768: 034	80 µl	neat
4537-3	3	2025-01-04	2025	Winter	1	D	4	4 -5 years	50	>24months	F	21/11/2020	HF	Subclinical	15	pos	pos	pos	pos	pos	16S-Mex-CMh-Mass	TI	5	19.3	30.79	31.25	33.82	33.82	NE	1660	179	non-quantifiable	non-quantifiable	NE	3.22011	2.25285	non-quantifiable	non-quantifiable	Ext, Robot IDVET	26/03/2025	81	50-100 d	6	0-50 d	87	0-100 d	MAG FAST768: 034	80 µl	neat
5407-3	3	2025-01-04	2025	Winter	1	D	3	3 years	42	>24months	F	18/07/2021	HF	Subclinical	15	pos	pos	pos	pos	neg	16S-Mex-CMh-	DI	5	19.5	34.64	34.68	32.75	0	NE	68.5	non-quantifiable	non-quantifiable	0	NE	1.83569	non-quantifiable	non-quantifiable	neg	Ext, Robot IDVET	26/03/2025	81	50-100 d	6	0-50 d	87	0-100 d	MAG FAST768: 034	80 µl	neat
5409-3	3	2025-01-04	2025	Winter	1	D	3	3 years	41	>24months	F	02/09/2021	HF	Subclinical	15	pos	pos	pos	pos	pos	16S-Mex-CMh-Mass	TI	5	20.58	30.94	30.14	29.39	37.36	NE	1150	155	97.6	NE	NE	3.0607	2.19033	1.98945	NE	Ext, Robot IDVET	26/03/2025	81	50-100 d	6	0-50 d	87	0-100 d	MAG FAST768: 034	80 µl	neat
5410-3	3	2025-01-04	2025	Winter	1	D	3	3 years	40	>24months	F	08/09/2021	HF	Subclinical	15	pos	pos	pos	neg	neg	16S-Mex-	MI	5	19.43	30.84	30.02	37.02	37.02	NE	1620	1190	0	0	NE	3.20952	3.07555	neg	neg	Ext, Robot IDVET	26/03/2025	81	50-100 d	6	0-50 d	87	0-100 d	MAG FAST768: 034	80 µl	neat
5411-3	3	2025-01-04	2025	Winter	1	D	3	3 years	40	>24months	F	10/09/2021	HF	Subclinical	15	pos	pos	pos	pos	pos	16S-Mex-CMh-Mass	TI	5	18.37	30.65	31.48	29.47	29.47	NE	1780	126	29.9	29.9	NE	3.25042	2.10037	1.47567	1.47567	Ext, Robot IDVET	26/03/2025	81	50-100 d	6	0-50 d	87	0-100 d	MAG FAST768: 034	80 µl	neat
5412-3	3	2025-01-04	2025	Winter	1	D	3	3 years	40	>24months	F	12/09/2021	HF	Subclinical	15	pos	pos	pos	pos	pos	16S-Mex-CMh-Mass	TI	5	18.15	30.04	30.32	29.98	29.98	NE	2370	751	16.3	16.3	NE	3.37475	2.87564	1.21219	1.21219	Ext, Robot IDVET	26/03/2025	81	50-100 d	6	0-50 d	87	0-100 d	MAG FAST768: 034	80 µl	neat
5413-3	3	2025-01-04	2025	Winter	1	D	3	3 years	40	>24months	F	22/09/2021	jersey	Subclinical	15	pos	pos	pos	pos	pos	16S-Mex-CMh-Mass	TI	5	18.78	32.5	32.61	33.44	33.44	NE	739	22.1	non-quantifiable	0.265	NE	2.86864	1.34439	non-quantifiable	0.1	Ext, Robot IDVET	26/03/2025	81	50-100 d	6	0-50 d	87	0-100 d	MAG FAST768: 034	80 µl	neat
5414-3	3	2025-01-04	2025	Winter	1	D	3	3 years	40	>24months	F	01/10/2021	HF	Subclinical	15	pos	pos	pos	pos	pos	16S-Mex-CMh-Mass	TI	5	19.36	31.62	34.72	29.32	29.32	NE	1120	non-quantifiable	35.7	35.7	NE	3.04922	non-quantifiable	1.55267	1.55267	Ext, Robot IDVET	26/03/2025	81	50-100 d	6	0-50 d	87	0-100 d	MAG FAST768: 034	80 µl	neat
5415-3	3	2025-01-04	2025	Winter	1	D	3	3 years	39	>24months	F	17/10/2021	HF	Subclinical	15	pos	pos	pos	pos	pos	16S-Mex-CMh-Mass	TI	5	19.77	32.95	31.47	29.43	29.43	NE	597	128	31.3	31.3	NE	2.77597	2.10721	1.49554	1.49554	Ext, Robot IDVET	26/03/2025	81	50-100 d	6	0-50 d	87	0-100 d	MAG FAST768: 034	80 µl	neat
6312-3	3	2025-01-04	2025	Winter	1	D	2	2 years	29	>24months	F	27/08/2022	HF	Subclinical	15	pos	pos	pos	pos	neg	16S-Mex-CMh-	DI	5	19.71	25.53	29.45	24.44	0	NE	71600	567	8000	0	NE	4.85491	2.75358	3.90309	neg	Ext, Robot IDVET	26/03/2025	81	50-100 d	6	0-50 d	87	0-100 d	MAG FAST768: 034	80 µl	neat
6314-3	3	2025-01-04	2025	Winter	1	D	2	2 years	29	>24months	F	02/09/2022	HF	Subclinical	15	pos	pos	pos	pos	pos	16S-Mex-CMh-Mass	TI	5	19.54	29.15	32.07	26.49	26.49	NE	3620	50.7	1040	1040	NE	3.55871	1.70501	3.01703	3.01703	Ext, Robot IDVET	26/03/2025	81	50-100 d	6	0-50 d	87	0-100 d	MAG FAST768: 034	80 µl	neat
6315-3	3	2025-01-04	2025	Winter	1	D	2	2 years	28	>24months	F	06/09/2022	HF	Subclinical	15	pos	pos	pos	pos	neg	16S-Mex-CMh-	DI	5	18.12	30.29	29.59	35.08	0	NE	1890	436	non-quantifiable	0	NE	3.27646	2.63949	non-quantifiable	neg	Ext, Robot IDVET	26/03/2025	81	50-100 d	6	0-50 d	87	0-100 d	MAG FAST768: 034	80 µl	neat
6318-3	3	2025-01-04	2025	Winter	1	D	2	2 years	28	>24months	F	09/09/2022	HF	Subclinical	15	pos	pos	pos	pos	pos	16S-Mex-CMh-Mass	TI	5	20.65	32.13	32.18	29.68	32.97	NE	465	3.35	75.4	603	NE	2.66745	0.525045	1.87737	2.78032	Ext, Robot IDVET	26/03/2025	81	50-100 d	6	0-50 d	87	0-100 d	MAG FAST768: 034	80 µl	neat
6319-3	3	2025-01-04	2025	Winter	1	D	2	2 years	28	>24months	F	11/09/2022	HF	Subclinical	15	pos	pos	pos	pos	neg	16S-Mex-CMh-	DI	5	19.15	27.92	34.82	26.22	0	NE	11600	non-quantifiable	1640	0	NE	4.06446	non-quantifiable	3.21484	neg	Ext, Robot IDVET	26/03/2025	81	50-100 d	6	0-50 d	87	0-100 d	MAG FAST768: 034	80 µl	neat
6322-3	3	2025-01-04	2025	Winter	1	D	2	2 years	28	>24months	F	22/09/2022	HF	Subclinical	15	pos	pos	pos	pos	neg	16S-Mex-CMh-	DI	5	19.08	32.24	32.58	31.8	0	NE	427	1.58	11.4	0	NE	2.63043	0.198657	1.0569	neg	Ext, Robot IDVET	26/03/2025	81	50-100 d	6	0-50 d	87	0-100 d	MAG FAST768: 034	80 µl	neat
6323-3	3	2025-01-04	2025	Winter	1	D	2	2 years	28	>24months	F	22/09/2022	HF	Subclinical	15	pos	pos	pos	pos	neg	16S-Mex-CMh-	DI	5	19.41	28.59	35.05	32.86	0	NE	6930	non-quantifiable	non-quantifiable	0	NE	3.84073	non-quantifiable	non-quantifiable	neg	Ext, Robot IDVET	26/03/2025	81	50-100 d	6	0-50 d	87	0-100 d	MAG FAST768: 034	80 µl	neat
6324-3	3	2025-01-04	2025	Winter	1	D	2	2 years	28	>24months	F	29/09/2022	HF	Subclinical	15	pos	pos	neg	pos	neg	16S-CMh-	MI	5	18.61	33.75	0	35.72	0	NE	135	0	non-quantifiable	0	NE	2.13033	neg	non-quantifiable	neg	Ext, Robot IDVET	26/03/2025	81	50-100 d	6	0-50 d	87	0-100 d	MAG FAST768: 034	80 µl	neat
6325-3	3	2025-01-04	2025	Winter	1	D	2	2 years	27	>24months	F	23/10/2022	HF	Subclinical	15	pos	pos	neg	pos	neg	16S-CMh-	MI	5	19.21	27.96	0	25.37	0	NE	11200	0	3490	0	NE	4.04922	neg	3.54283	neg	Ext, Robot IDVET	26/03/2025	81	50-100 d	6	0-50 d	87	0-100 d	MAG FAST768: 034	80 µl	neat
6326-3	3	2025-01-04	2025	Winter	1	D	2	2 years	26	>24months	F	16/11/2022	HF	Subclinical	15	pos	pos	neg	pos	neg	16S-CMh-	MI	5	19.32	32.47	0	29.22	0	NE	359	0	114	0	NE	2.55509	neg	2.0569	neg	Ext, Robot IDVET	26/03/2025	81	50-100 d	6	0-50 d	87	0-100 d	MAG FAST768: 034	80 µl	neat
6327-3	3	2025-01-04	2025	Winter	1	D	2	2 years	24	18 months-24 months	F	17/01/2023	crossbred	Subclinical	15	pos	pos	pos	pos	neg	16S-Mex-CMh-	DI	5	19.44	30.98	31.89	28.08	0	NE	1120	5.77	313	0	NE	3.04922	0.761176	2.49554	neg	Ext, Robot IDVET	26/03/2025	81	50-100 d	6	0-50 d	87	0-100 d	MAG FAST768: 034	80 µl	neat
6344-3	3	2025-01-04	2025	Winter	1	D	2	2 years	23	18 months-24 months	M	12/02/2023	crossbred	Subclinical	15	pos	pos	pos	neg	neg	16S-Mex-	MI	5	18.96	30.38	29.16	0	0	NE	1770	979	0	0	NE	3.24797	2.99078	neg	neg	Ext, Robot IDVET	26/03/2025	81	50-100 d	6	0-50 d	87	0-100 d	MAG FAST768: 034	80 µl	neat
6346-3	3	2025-01-04	2025	Winter	1	D	2	2 years	23	18 months-24 months	M	03/02/2023	crossbred	Subclinical	15	pos	pos	pos	pos	neg	16S-Mex-CMh-	DI	5	18.77	33	28.33	27.02	0	NE	239	4660	805	0	NE	2.3784	3.66839	2.9058	neg	Ext, Robot IDVET	26/03/2025	81	50-100 d	6	0-50 d	87	0-100 d	MAG FAST768: 034	80 µl	neat
6369-3	3	2025-01-04	2025	Winter	1	D	2	2 years	27	>24months	F	03/10/2022	crossbred	Subclinical	15	pos	pos	neg	pos	neg	16S-CMh-	MI	5	21.23	30.19	0	32.32	0	NE	2040	0	non-quantifiable	0	NE	3.30963	neg	non-quantifiable	neg	Ext, Robot IDVET	26/03/2025	81	50-100 d	6	0-50 d	87	0-100 d	MAG FAST768: 034	80 µl	neat
742-3	3	2025-01-04	2025	Winter	1	D	8	> 5 years	101	>24months	F	23/09/2016	HF	Subclinical	15	pos	pos	neg	pos	neg	16S-CMh-	MI	5	18.32	33.44	0	33.28	0	NE	171	0	non-quantifiable	0	NE	2.233	neg	non-quantifiable	neg	Ext, Robot IDVET	26/03/2025	81	50-100 d	6	0-50 d	87	0-100 d	MAG FAST768: 034	80 µl	neat
745-3	3	2025-01-04	2025	Winter	1	D	8	> 5 years	100	>24months	F	16/10/2016	HF	Subclinical	15	pos	pos	pos	pos	neg	16S-Mex-CMh-	DI	5	19.41	33.03	30.96	35.12	0	NE	234	33.2	non-quantifiable	0	NE	2.36922	1.52114	non-quantifiable	neg	Ext, Robot IDVET	26/03/2025	81	50-100 d	6	0-50 d	87	0-100 d	MAG FAST768: 034	80 µl	neat
751-3	3	2025-01-04	2025	Winter	1	D	8	> 5 years	99	>24months	F	15/11/2016	HF	Subclinical	15	pos	neg	neg	neg	neg	NI	NI	5	20.46	39.13	0	0	0	NE	0	0	0	0	NE	neg	neg	neg	neg	Ext. Robot IDVET	26/03/2025	81	50-100 d	6	0-50 d	87	0-100 d	MAG FAST768: 034	80 µl	neat
753-3	3	2025-01-04	2025	Winter	1	D	8	> 5 years	98	>24months	F	03/12/2016	HF	Subclinical	15	pos	pos	neg	pos	pos	16S-CMh-Mass	DI	5	19.62	35.25	0	34.39	34.39	NE	non-quantifiable	0	non-quantifiable	non-quantifiable	NE	non-quantifiable	neg	non-quantifiable	non-quantifiable	Ext. Robot IDVET	26/03/2025	81	50-100 d	6	0-50 d	87	0-100 d	MAG FAST768: 034	80 µl	neat
756-3	3	2025-01-04	2025	Winter	1	D	8	> 5 years	97	>24months	F	13/01/2017	HF	Subclinical	15	pos	pos	pos	neg	neg	16S-Mex-	MI	5	20.98	36.03	35.76	0	0	NE	non-quantifiable	non-quantifiable	0	0	NE	non-quantifiable	non-quantifiable	neg	neg	Ext. Robot IDVET	26/03/2025	81	50-100 d	6	0-50 d	87	0-100 d	MAG FAST768: 034	80 µl	neat
7856-3	3	2025-01-04	2025	Winter	1	D	1	0 -1 year	18	12-18 months	F	18/07/2023	HF	Subclinical	15	pos	pos	neg	pos	pos	16S-CMh-Mass	DI	5	19.09	29.74	0	27.6	30.88	NE	2880	0	480	2220	NE	3.45939	neg	2.68124	3.34635	Ext, Robot IDVET	26/03/2025	81	50-100 d	6	0-50 d	87	0-100 d	MAG FAST768: 034	80 µl	neat
7857-3	3	2025-01-04	2025	Winter	1	D	1	0 -1 year	17	12-18 months	F	17/08/2023	crossbred	Subclinical	15	pos	pos	neg	pos	neg	16S-CMh-	MI	5	18.62	28.25	0	25.18	37.78	NE	8980	0	4140	0	NE	3.95328	neg	3.617	neg	Ext, Robot IDVET	26/03/2025	81	50-100 d	6	0-50 d	87	0-100 d	MAG FAST768: 034	80 µl	neat
7859-3	3	2025-01-04	2025	Winter	1	D	1	0 -1 year	17	12-18 months	F	28/08/2023	HF	Subclinical	15	pos	pos	pos	pos	neg	16S-Mex-CMh-	DI	5	19.01	29.79	30.9	27.2	35.14	NE	2770	37.1	685	0	NE	3.44248	1.56937	2.83569	neg	Ext, Robot IDVET	26/03/2025	81	50-100 d	6	0-50 d	87	0-100 d	MAG FAST768: 034	80 µl	neat
7860-3	3	2025-01-04	2025	Winter	1	D	1	0 -1 year	16	12-18 months	F	09/09/2023	HF	Subclinical	15	pos	pos	pos	pos	pos	16S-Mex-CMh-Mass	TI	5	19.08	25.49	28.9	25.69	26.18	NE	73800	1600	2630	41400	NE	4.86806	3.20412	3.41996	4.617	Ext, Robot IDVET	26/03/2025	81	50-100 d	6	0-50 d	87	0-100 d	MAG FAST768: 034	80 µl	neat
7861-3	3	2025-01-04	2025	Winter	1	D	1	0 -1 year	16	12-18 months	F	12/09/2023	HF	Subclinical	15	pos	pos	pos	pos	neg	16S-Mex-CMh-	DI	5	20.28	33.28	32.21	32.81	0	NE	193	3.16	non-quantifiable	0	NE	2.28556	0.499687	non-quantifiable	neg	Ext, Robot IDVET	26/03/2025	81	50-100 d	6	0-50 d	87	0-100 d	MAG FAST768: 034	80 µl	neat
7862-3	3	2025-01-04	2025	Winter	1	D	1	0 -1 year	16	12-18 months	F	14/09/2023	HF	Subclinical	15	pos	pos	neg	pos	neg	16S-CMh-	MI	5	18.87	32.47	0	31.16	0	NE	359	0	20.2	0	NE	2.55509	neg	1.30535	neg	Ext, Robot IDVET	26/03/2025	81	50-100 d	6	0-50 d	87	0-100 d	MAG FAST768: 034	80 µl	neat
7864-3	3	2025-01-04	2025	Winter	1	D	1	0 -1 year	15	12-18 months	F	29/09/2023	crossbred	Subclinical	15	pos	pos	pos	pos	neg	16S-Mex-CMh-	DI	5	19.25	28.9	28.58	26.53	0	NE	5470	2910	1240	0	NE	3.73799	3.46389	3.09342	neg	Ext, Robot IDVET	26/03/2025	81	50-100 d	6	0-50 d	87	0-100 d	MAG FAST768: 034	80 µl	neat
7867-3	3	2025-01-04	2025	Winter	1	D	1	0 -1 year	14	12-18 months	F	11/11/2023	HF	Subclinical	15	pos	pos	pos	pos	neg	16S-Mex-CMh-	DI	5	18.91	28.86	28.07	27.38	0	NE	5640	7600	584	0	NE	3.75128	3.88081	2.76641	neg	Ext, Robot IDVET	26/03/2025	81	50-100 d	6	0-50 d	87	0-100 d	MAG FAST768: 034	80 µl	neat
7868-3	3	2025-01-04	2025	Winter	1	D	1	0 -1 year	12	6-12 months	F	29/12/2023	HF	Subclinical	15	pos	pos	pos	pos	neg	16S-Mex-CMh-	DI	5	20.3	27.45	26.49	27.38	0	NE	16500	148000	584	0	NE	4.21748	5.17026	2.76641	neg	Ext, Robot IDVET	26/03/2025	81	50-100 d	6	0-50 d	87	0-100 d	MAG FAST768: 034	80 µl	neat
7869-3	3	2025-01-04	2025	Winter	1	D	1	0 -1 year	12	6-12 months	F	05/01/2024	HF	Subclinical	15	pos	pos	pos	pos	neg	16S-Mex-CMh-	DI	5	19.54	29.77	30.87	26.83	35.68	NE	2820	39.3	953	0	NE	3.45025	1.59439	2.97909	neg	Ext, Robot IDVET	26/03/2025	81	50-100 d	6	0-50 d	87	0-100 d	MAG FAST768: 034	80 µl	neat
7870-3	3	2025-01-04	2025	Winter	1	D	1	0 -1 year	12	6-12 months	F	11/01/2024	HF	Subclinical	15	pos	pos	neg	pos	pos	16S-CMh-Mass	DI	5	18.48	27.26	0	26.04	28.2	NE	19100	0	1930	11800	NE	4.28103	neg	3.28556	4.07188	Ext, Robot IDVET	26/03/2025	81	50-100 d	6	0-50 d	87	0-100 d	MAG FAST768: 034	80 µl	neat
7872-3	3	2025-01-04	2025	Winter	1	D	1	0 -1 year	11	6-12 months	F	01/02/2024	HF	Subclinical	15	pos	pos	pos	pos	neg	16S-Mex-CMh-	DI	5	19.12	29.78	32.03	26.91	0	NE	2790	4.44	887	0	NE	3.4456	0.647383	2.94792	neg	Ext, Robot IDVET	26/03/2025	81	50-100 d	6	0-50 d	87	0-100 d	MAG FAST768: 034	80 µl	neat
7893-3	3	2025-01-04	2025	Winter	1	D	1	0 -1 year	14	12-18 months	M	04/11/2023	crossbred	Subclinical	15	pos	pos	pos	pos	pos	16S-Mex-CMh-Mass	TI	5	19.57	32.95	31.12	25.04	32.97	NE	249	24.6	4690	603	NE	2.3962	1.39094	3.67117	2.78032	Ext, Robot IDVET	26/03/2025	81	50-100 d	6	0-50 d	87	0-100 d	MAG FAST768: 034	80 µl	neat
7900-3	3	2025-01-04	2025	Winter	1	D	1	0 -1 year	15	12-18 months	F	01/10/2023	crossbred	Subclinical	15	pos	pos	pos	pos	neg	16S-Mex-CMh-	DI	5	20.88	29.54	30.84	26.74	0	NE	3360	41.6	1030	0	NE	3.52634	1.61909	3.01284	neg	Ext, Robot IDVET	26/03/2025	81	50-100 d	6	0-50 d	87	0-100 d	MAG FAST768: 034	80 µl	neat
7902-3	3	2025-01-04	2025	Winter	1	D	1	0 -1 year	15	12-18 months	M	08/10/2023	crossbred	Subclinical	15	pos	pos	pos	pos	neg	16S-Mex-CMh-	DI	5	19.49	30.02	29.99	28.15	35.07	NE	2330	206	294	0	NE	3.36736	2.31387	2.46835	neg	Ext, Robot IDVET	26/03/2025	81	50-100 d	6	0-50 d	87	0-100 d	MAG FAST768: 034	80 µl	neat
3937-1	1	2021-04-03	2021	Spring	4	D	8	> 5 years	93	>24months	F	22/08/2013	HF	Subclinical	31	pos	pos	pos	pos	neg	16S-Mex-CMh-	DI	5	21.2	27.7	31.14	30.83	0	NE	NE	NE	NE	0	NE	NE	NE	NE	neg	Ext. Kit Qiagen	21/04/2021	18	0-50 d	99	50-100 d	117	100-200 d	ancien kit	50 µl	10-2
6278-1	1	2021-04-03	2021	Spring	4	D	5	4 -5 years	58	>24months	F	17/06/2016	HF	Subclinical	31	pos	pos	pos	neg	neg	16S-Mex-	MI	5	20.2	34.18	33.21	0	0	NE	NE	NE	0	0	NE	NE	NE	neg	neg	Ext. Kit Qiagen	21/04/2021	18	0-50 d	99	50-100 d	117	100-200 d	ancien kit	50 µl	10-2
7058-1	1	2021-04-03	2021	Spring	4	D	4	4 -5 years	48	>24months	F	25/04/2017	HF	Subclinical	31	pos	pos	neg	neg	neg	16S-	unknown	5	20.92	33.4	0	0	0	NE	NE	0	0	0	NE	NE	neg	neg	neg	Ext. Kit Qiagen	21/04/2021	18	0-50 d	99	50-100 d	117	100-200 d	ancien kit	50 µl	10-2
8735-1	1	2021-04-03	2021	Spring	4	D	3	3 years	34	>24months	F	24/06/2018	HF	Subclinical	31	pos	pos	neg	pos	neg	16S-CMh-	MI	5	20.46	29.42	0	29.18	0	NE	NE	0	NE	0	NE	NE	neg	NE	neg	Ext. Kit Qiagen	21/04/2021	18	0-50 d	99	50-100 d	117	100-200 d	ancien kit	50 µl	10-2
8746-1	1	2021-04-03	2021	Spring	4	D	3	3 years	33	>24months	F	16/07/2018	HF	Subclinical	31	pos	pos	pos	pos	pos	16S-Mex-CMh-Mass	TI	5	20.8	28.14	31.36	26.34	32.34	NE	NE	NE	NE	NE	NE	NE	NE	NE	NE	Ext. Kit Qiagen	21/04/2021	18	0-50 d	99	50-100 d	117	100-200 d	ancien kit	50 µl	10-2
8782-1	1	2021-04-03	2021	Spring	4	D	2	2 years	30	>24months	F	10/10/2018	HF	Subclinical	31	pos	pos	pos	pos	pos	16S-Mex-CMh-Mass	TI	5	20.78	25.55	33.07	26.98	30.51	NE	NE	NE	NE	NE	NE	NE	NE	NE	NE	Ext. Kit Qiagen	21/04/2021	18	0-50 d	99	50-100 d	117	100-200 d	ancien kit	50 µl	10-2
9610-1	1	2021-04-03	2021	Spring	4	D	2	2 years	27	>24months	F	16/01/2019	HF	Subclinical	31	pos	pos	pos	pos	neg	16S-Mex-CMh-	DI	5	19.87	28.73	31.45	28.91	0	NE	NE	NE	NE	0	NE	NE	NE	NE	neg	Ext. Kit Qiagen	21/04/2021	18	0-50 d	99	50-100 d	117	100-200 d	ancien kit	50 µl	10-2
6236-1	1	2021-04-03	2021	Spring	4	D	5	4 -5 years	62	>24months	F	27/02/2016	HF	Subclinical	31	pos	pos	pos	pos	neg	16S-Mex-CMh-	DI	5	20.52	29.79	34.39	29.68	0	NE	NE	NE	NE	0	NE	NE	NE	NE	neg	Ext. Kit Qiagen	20/04/2021	17	0-50 d	100	50-100 d	117	100-200 d	ancien kit	50 µl	10-2
7050-1	1	2021-04-03	2021	Spring	4	D	4	4 -5 years	49	>24months	F	14/03/2017	crossbred	Subclinical	31	pos	pos	neg	pos	neg	16S-CMh-	MI	5	20.09	30.7	0	30.47	0	NE	NE	0	NE	0	NE	NE	neg	NE	neg	Ext. Kit Qiagen	20/04/2021	17	0-50 d	100	50-100 d	117	100-200 d	ancien kit	50 µl	10-2
7052-1	1	2021-04-03	2021	Spring	4	D	4	4 -5 years	49	>24months	F	28/03/2017	HF	Subclinical	31	pos	pos	pos	pos	neg	16S-Mex-CMh-	DI	5	20.62	31.25	34.88	30.58	0	NE	NE	NE	NE	0	NE	NE	NE	NE	neg	Ext. Kit Qiagen	20/04/2021	17	0-50 d	100	50-100 d	117	100-200 d	ancien kit	50 µl	10-2
7110-1	1	2021-04-03	2021	Spring	4	D	4	4 -5 years	43	>24months	F	03/10/2017	HF	Subclinical	31	pos	pos	pos	pos	pos	16S-Mex-CMh-Mass	TI	5	20.46	27.84	30.02	26.09	33.57	NE	NE	NE	NE	NE	NE	NE	NE	NE	NE	Ext. Kit Qiagen	20/04/2021	17	0-50 d	100	50-100 d	117	100-200 d	ancien kit	50 µl	10-2
7113-1	1	2021-04-03	2021	Spring	4	D	3	3 years	41	>24months	F	19/11/2017	HF	Subclinical	31	pos	pos	pos	neg	neg	16S-Mex-	MI	5	19.93	28.52	28.91	0	0	NE	NE	NE	0	0	NE	NE	NE	neg	neg	Ext. Kit Qiagen	20/04/2021	17	0-50 d	100	50-100 d	117	100-200 d	ancien kit	50 µl	10-2
7182-1	1	2021-04-03	2021	Spring	4	D	3	3 years	34	>24months	F	12/06/2018	HF	Subclinical	31	pos	pos	pos	pos	neg	16S-Mex-CMh-	DI	5	20.46	30.38	32.53	29.09	0	NE	NE	NE	NE	0	NE	NE	NE	NE	neg	Ext. Kit Qiagen	20/04/2021	17	0-50 d	100	50-100 d	117	100-200 d	ancien kit	50 µl	10-2
8483-1	1	2021-04-03	2021	Spring	4	D	3	3 years	32	>24months	F	28/08/2018	HF	Subclinical	31	pos	pos	pos	pos	neg	16S-Mex-CMh-	DI	5	20.13	27.82	29.35	29.77	0	NE	NE	NE	NE	0	NE	NE	NE	NE	neg	Ext. Kit Qiagen	20/04/2021	17	0-50 d	100	50-100 d	117	100-200 d	ancien kit	50 µl	10-2
8699-1	1	2021-04-03	2021	Spring	4	D	3	3 years	37	>24months	F	07/03/2018	HF	Subclinical	31	pos	neg	pos	neg	neg	Mex-	unknown	5	20.1	36.32	23.81	0	0	NE	0	NE	0	0	NE	neg	NE	neg	neg	Ext. Kit Qiagen	20/04/2021	17	0-50 d	100	50-100 d	117	100-200 d	ancien kit	50 µl	10-2
8702-1	1	2021-04-03	2021	Spring	4	D	3	3 years	37	>24months	F	11/03/2018	HF	Subclinical	31	pos	pos	pos	pos	neg	16S-Mex-CMh-	DI	5	20.32	29.88	31.26	30.76	0	NE	NE	NE	NE	0	NE	NE	NE	NE	neg	Ext. Kit Qiagen	20/04/2021	17	0-50 d	100	50-100 d	117	100-200 d	ancien kit	50 µl	10-2
8765-1	1	2021-04-03	2021	Spring	4	D	3	3 years	32	>24months	F	19/08/2018	HF	Subclinical	31	pos	pos	pos	pos	pos	16S-Mex-CMh-Mass	TI	5	20.97	27.43	26.02	29.66	34.73	NE	NE	NE	NE	NE	NE	NE	NE	NE	NE	Ext. Kit Qiagen	20/04/2021	17	0-50 d	100	50-100 d	117	100-200 d	ancien kit	50 µl	10-2
9605-1	1	2021-04-03	2021	Spring	4	D	2	2 years	27	>24months	F	04/01/2019	HF	Subclinical	31	pos	pos	pos	pos	neg	16S-Mex-CMh-	DI	5	19.91	28.73	32.5	26.13	0	NE	NE	NE	NE	0	NE	NE	NE	NE	neg	Ext. Kit Qiagen	20/04/2021	17	0-50 d	100	50-100 d	117	100-200 d	ancien kit	50 µl	10-2
9613-1	1	2021-04-03	2021	Spring	4	D	2	2 years	27	>24months	F	27/01/2019	crossbred	Subclinical	31	pos	pos	pos	pos	neg	16S-Mex-CMh-	DI	5	20.64	29.17	33.02	28.08	0	NE	NE	NE	NE	0	NE	NE	NE	NE	neg	Ext. Kit Qiagen	20/04/2021	17	0-50 d	100	50-100 d	117	100-200 d	ancien kit	50 µl	10-2
9624-1	1	2021-04-03	2021	Spring	4	D	2	2 years	26	>24months	F	09/02/2019	HF	Subclinical	31	pos	pos	pos	pos	pos	16S-Mex-CMh-Mass	TI	5	19.31	26.58	31.93	28.95	29.83	NE	NE	NE	NE	NE	NE	NE	NE	NE	NE	Ext. Kit Qiagen	20/04/2021	17	0-50 d	100	50-100 d	117	100-200 d	ancien kit	50 µl	10-2
9640-1	1	2021-04-03	2021	Spring	4	D	2	2 years	25	>24months	F	24/03/2019	HF	Subclinical	31	pos	pos	pos	pos	pos	16S-Mex-CMh-Mass	TI	5	19.98	23.19	25.25	29.4	27.95	NE	NE	NE	NE	NE	NE	NE	NE	NE	NE	Ext. Kit Qiagen	20/04/2021	17	0-50 d	100	50-100 d	117	100-200 d	ancien kit	50 µl	10-2
1667-1	1	2021-04-03	2021	Spring	4	D	0	0 -1 year	1	0-6 months	F	24/02/2021	HF	Subclinical	31	pos	neg	neg	neg	neg	NI	NI	5	20.59	0	0	0	0	NE	0	0	0	0	NE	neg	neg	neg	neg	Ext. Kit Qiagen	19/04/2021	16	0-50 d	101	>100 d	117	100-200 d	ancien kit	50 µl	10-2
235-1	1	2021-04-03	2021	Spring	4	D	0	0 -1 year	2	0-6 months	F	27/01/2021	HF	Subclinical	31	pos	neg	neg	neg	neg	NI	NI	5	20.94	0	0	0	0	NE	0	0	0	0	NE	neg	neg	neg	neg	Ext. Kit Qiagen	19/04/2021	16	0-50 d	101	>100 d	117	100-200 d	ancien kit	50 µl	10-2
238-1	1	2021-04-03	2021	Spring	4	D	0	0 -1 year	2	0-6 months	F	30/01/2021	HF	Subclinical	31	pos	neg	neg	neg	neg	NI	NI	5	20.72	0	0	0	0	NE	0	0	0	0	NE	neg	neg	neg	neg	Ext. Kit Qiagen	19/04/2021	16	0-50 d	101	>100 d	117	100-200 d	ancien kit	50 µl	10-2
239-1	1	2021-04-03	2021	Spring	4	D	0	0 -1 year	2	0-6 months	F	01/02/2021	HF	Subclinical	31	pos	neg	neg	neg	neg	NI	NI	5	20	0	0	0	0	NE	0	0	0	0	NE	neg	neg	neg	neg	Ext. Kit Qiagen	19/04/2021	16	0-50 d	101	>100 d	117	100-200 d	ancien kit	50 µl	10-2
242-1	1	2021-04-03	2021	Spring	4	D	0	0 -1 year	2	0-6 months	F	03/02/2021	crossbred	Subclinical	31	pos	pos	pos	neg	neg	16S-Mex-	MI	5	19.77	28.59	32.89	0	0	NE	NE	NE	0	0	NE	NE	NE	neg	neg	Ext. Kit Qiagen	19/04/2021	16	0-50 d	101	>100 d	117	100-200 d	ancien kit	50 µl	10-2
3960-1	1	2021-04-03	2021	Spring	4	D	8	> 5 years	91	>24months	F	30/09/2013	HF	Subclinical	31	pos	pos	pos	neg	neg	16S-Mex-	MI	5	20.33	33.36	34.11	0	0	NE	NE	NE	0	0	NE	NE	NE	neg	neg	Ext. Kit Qiagen	19/04/2021	16	0-50 d	101	>100 d	117	100-200 d	ancien kit	50 µl	10-2
3987-1	1	2021-04-03	2021	Spring	4	D	7	> 5 years	89	>24months	F	02/12/2013	HF	Subclinical	31	pos	neg	neg	neg	neg	NI	NI	5	21.48	37.12	0	0	0	NE	0	0	0	0	NE	neg	neg	neg	neg	Ext. Kit Qiagen	19/04/2021	16	0-50 d	101	>100 d	117	100-200 d	ancien kit	50 µl	10-2
6317-1	1	2021-04-03	2021	Spring	4	D	5	4 -5 years	55	>24months	F	18/09/2016	crossbred	Subclinical	31	pos	neg	neg	pos	neg	CMh-	unknown	5	21.16	0	0	33.93	0	NE	0	0	NE	0	NE	neg	neg	NE	neg	Ext. Kit Qiagen	19/04/2021	16	0-50 d	101	>100 d	117	100-200 d	ancien kit	50 µl	10-2
6334-1	1	2021-04-03	2021	Spring	4	D	4	4 -5 years	54	>24months	F	22/10/2016	HF	Subclinical	31	pos	pos	pos	neg	neg	16S-Mex-	MI	5	20.34	26.1	30.27	0	0	NE	NE	NE	0	0	NE	NE	NE	neg	neg	Ext. Kit Qiagen	19/04/2021	16	0-50 d	101	>100 d	117	100-200 d	ancien kit	50 µl	10-2
8719-1	1	2021-04-03	2021	Spring	4	D	3	3 years	36	>24months	F	15/04/2018	HF	Subclinical	31	pos	pos	pos	neg	neg	16S-Mex-	MI	5	20.66	30.55	31.16	0	0	NE	NE	NE	0	0	NE	NE	NE	neg	neg	Ext. Kit Qiagen	19/04/2021	16	0-50 d	101	>100 d	117	100-200 d	ancien kit	50 µl	10-2
8747-1	1	2021-04-03	2021	Spring	4	D	3	3 years	33	>24months	F	18/07/2018	HF	Subclinical	31	pos	pos	pos	pos	neg	16S-Mex-CMh-	DI	5	20.69	29.32	29.87	29.39	0	NE	NE	NE	NE	0	NE	NE	NE	NE	neg	Ext. Kit Qiagen	19/04/2021	16	0-50 d	101	>100 d	117	100-200 d	ancien kit	50 µl	10-2
9370-1	1	2021-04-03	2021	Spring	4	D	2	2 years	26	>24months	F	31/01/2019	HF	Subclinical	31	pos	pos	pos	pos	pos	16S-Mex-CMh-Mass	TI	5	20.97	26.54	32.31	28.2	28.97	NE	NE	NE	NE	NE	NE	NE	NE	NE	NE	Ext. Kit Qiagen	19/04/2021	16	0-50 d	101	>100 d	117	100-200 d	ancien kit	50 µl	10-2
9631-1	1	2021-04-03	2021	Spring	4	D	2	2 years	26	>24months	F	28/02/2019	HF	Subclinical	31	pos	pos	pos	pos	pos	16S-Mex-CMh-Mass	TI	5	20.54	22.73	31.1	29.34	25.79	NE	NE	NE	NE	NE	NE	NE	NE	NE	NE	Ext. Kit Qiagen	19/04/2021	16	0-50 d	101	>100 d	117	100-200 d	ancien kit	50 µl	10-2
9656-1	1	2021-04-03	2021	Spring	4	D	2	2 years	23	18 months-24 months	F	02/05/2019	HF	Subclinical	31	pos	pos	pos	pos	neg	16S-Mex-CMh-	DI	5	20.31	29.36	31.63	28.94	0	NE	NE	NE	NE	0	NE	NE	NE	NE	neg	Ext. Kit Qiagen	19/04/2021	16	0-50 d	101	>100 d	117	100-200 d	ancien kit	50 µl	10-2
9662-1	1	2021-04-03	2021	Spring	4	D	2	2 years	22	18 months-24 months	F	02/06/2019	HF	Subclinical	31	pos	pos	pos	pos	neg	16S-Mex-CMh-	DI	5	20.29	31.87	33.34	30.28	0	NE	NE	NE	NE	0	NE	NE	NE	NE	neg	Ext. Kit Qiagen	19/04/2021	16	0-50 d	101	>100 d	117	100-200 d	ancien kit	50 µl	10-2
9667-1	1	2021-04-03	2021	Spring	4	D	2	2 years	22	18 months-24 months	F	12/06/2019	HF	Subclinical	31	pos	pos	pos	pos	neg	16S-Mex-CMh-	DI	5	20.71	26.73	28.02	27.85	0	NE	NE	NE	NE	0	NE	NE	NE	NE	neg	Ext. Kit Qiagen	19/04/2021	16	0-50 d	101	>100 d	117	100-200 d	ancien kit	50 µl	10-2
9680-1	1	2021-04-03	2021	Spring	4	D	2	2 years	21	18 months-24 months	F	09/07/2019	HF	Subclinical	31	pos	pos	pos	pos	neg	16S-Mex-CMh-	DI	5	20.64	29.39	29.99	31.25	0	NE	NE	NE	NE	0	NE	NE	NE	NE	neg	Ext. Kit Qiagen	19/04/2021	16	0-50 d	101	>100 d	117	100-200 d	ancien kit	50 µl	10-2
9716-1	1	2021-04-03	2021	Spring	4	D	1	0 -1 year	17	12-18 months	F	03/11/2019	HF	Subclinical	31	pos	pos	pos	pos	pos	16S-Mex-CMh-Mass	TI	5	20.52	26.84	28.77	28.6	31.88	NE	NE	NE	NE	NE	NE	NE	NE	NE	NE	Ext. Kit Qiagen	19/04/2021	16	0-50 d	101	>100 d	117	100-200 d	ancien kit	50 µl	10-2
8789-1	1	2021-04-03	2021	Spring	4	D	2	2 years	29	>24months	F	03/11/2018	HF	Subclinical	31	pos	pos	pos	pos	pos	16S-Mex-CMh-Mass	TI	5	20.4	26.91	30.18	26.28	33.05	NE	NE	NE	NE	NE	NE	NE	NE	NE	NE	Ext. Kit Qiagen	16/04/2021	13	0-50 d	104	>100 d	117	100-200 d	ancien kit	50 µl	10-2
8793-1	1	2021-04-03	2021	Spring	4	D	2	2 years	29	>24months	F	23/11/2018	HF	Subclinical	31	pos	pos	pos	pos	neg	16S-Mex-CMh-	DI	5	23.11	29.98	32.9	28.84	0	NE	NE	NE	NE	0	NE	NE	NE	NE	neg	Ext. Kit Qiagen	16/04/2021	13	0-50 d	104	>100 d	117	100-200 d	ancien kit	50 µl	10-2
9633-1	1	2021-04-03	2021	Spring	4	D	2	2 years	25	>24months	F	02/03/2019	HF	Subclinical	31	pos	pos	pos	pos	neg	16S-Mex-CMh-	DI	5	20.64	26.82	28.14	30.18	0	NE	NE	NE	NE	0	NE	NE	NE	NE	neg	Ext. Kit Qiagen	16/04/2021	13	0-50 d	104	>100 d	117	100-200 d	ancien kit	50 µl	10-2
9637-1	1	2021-04-03	2021	Spring	4	D	2	2 years	25	>24months	F	17/03/2019	HF	Subclinical	31	pos	pos	pos	pos	neg	16S-Mex-CMh-	DI	5	21.54	29.23	29.65	30.49	0	NE	NE	NE	NE	0	NE	NE	NE	NE	neg	Ext. Kit Qiagen	16/04/2021	13	0-50 d	104	>100 d	117	100-200 d	ancien kit	50 µl	10-2
9638-1	1	2021-04-03	2021	Spring	4	D	2	2 years	25	>24months	F	17/03/2019	HF	Subclinical	31	pos	pos	pos	pos	pos	16S-Mex-CMh-Mass	TI	5	20.51	26.33	28.55	30.27	30.13	NE	NE	NE	NE	NE	NE	NE	NE	NE	NE	Ext. Kit Qiagen	16/04/2021	13	0-50 d	104	>100 d	117	100-200 d	ancien kit	50 µl	10-2
9666-1	1	2021-04-03	2021	Spring	4	D	2	2 years	22	18 months-24 months	F	11/06/2019	HF	Subclinical	31	pos	pos	pos	pos	neg	16S-Mex-CMh-	DI	5	20.62	30.23	31.6	29.5	0	NE	NE	NE	NE	0	NE	NE	NE	NE	neg	Ext. Kit Qiagen	16/04/2021	13	0-50 d	104	>100 d	117	100-200 d	ancien kit	50 µl	10-2
9675-1	1	2021-04-03	2021	Spring	4	D	2	2 years	21	18 months-24 months	F	01/07/2019	HF	Subclinical	31	pos	pos	pos	pos	neg	16S-Mex-CMh-	DI	5	20.33	26.61	27.58	27.17	0	NE	NE	NE	NE	0	NE	NE	NE	NE	neg	Ext. Kit Qiagen	16/04/2021	13	0-50 d	104	>100 d	117	100-200 d	ancien kit	50 µl	10-2
9707-1	1	2021-04-03	2021	Spring	4	D	2	2 years	19	18 months-24 months	F	26/09/2019	HF	Subclinical	31	pos	pos	pos	pos	neg	16S-Mex-CMh-	DI	5	20.44	28.16	30.77	28.11	0	NE	NE	NE	NE	0	NE	NE	NE	NE	neg	Ext. Kit Qiagen	16/04/2021	13	0-50 d	104	>100 d	117	100-200 d	ancien kit	50 µl	10-2
9710-1	1	2021-04-03	2021	Spring	4	D	1	0 -1 year	18	12-18 months	F	19/10/2019	HF	Subclinical	31	pos	pos	pos	pos	neg	16S-Mex-CMh-	DI	5	20.53	28.52	30.42	29.01	0	NE	NE	NE	NE	0	NE	NE	NE	NE	neg	Ext. Kit Qiagen	16/04/2021	13	0-50 d	104	>100 d	117	100-200 d	ancien kit	50 µl	10-2
9713-1	1	2021-04-03	2021	Spring	4	D	1	0 -1 year	18	12-18 months	F	20/10/2019	HF	Subclinical	31	pos	pos	pos	pos	pos	16S-Mex-CMh-Mass	TI	5	20.26	25.45	26.92	27.8	28.95	NE	NE	NE	NE	NE	NE	NE	NE	NE	NE	Ext. Kit Qiagen	16/04/2021	13	0-50 d	104	>100 d	117	100-200 d	ancien kit	50 µl	10-2
9714-1	1	2021-04-03	2021	Spring	4	D	1	0 -1 year	17	12-18 months	F	02/11/2019	HF	Subclinical	31	pos	pos	pos	pos	neg	16S-Mex-CMh-	DI	5	20.23	28.33	31.91	27.88	0	NE	NE	NE	NE	0	NE	NE	NE	NE	neg	Ext. Kit Qiagen	16/04/2021	13	0-50 d	104	>100 d	117	100-200 d	ancien kit	50 µl	10-2
9726-1	1	2021-04-03	2021	Spring	4	D	1	0 -1 year	16	12-18 months	F	06/12/2019	HF	Subclinical	31	pos	pos	pos	pos	neg	16S-Mex-CMh-	DI	5	20.21	28.17	29.98	27.03	0	NE	NE	NE	NE	0	NE	NE	NE	NE	neg	Ext. Kit Qiagen	16/04/2021	13	0-50 d	104	>100 d	117	100-200 d	ancien kit	50 µl	10-2
159-1	1	2021-04-03	2021	Spring	4	D	1	0 -1 year	15	12-18 months	F	06/01/2020	HF	Subclinical	31	pos	pos	pos	pos	neg	16S-Mex-CMh-	DI	5	19.8	26.8	29.3	26.56	0	NE	NE	NE	NE	0	NE	NE	NE	NE	neg	Ext. Kit Qiagen	14/04/2021	11	0-50 d	106	>100 d	117	100-200 d	ancien kit	50 µl	10-2
8766-1	1	2021-04-03	2021	Spring	4	D	3	3 years	32	>24months	F	19/08/2018	HF	Subclinical	31	pos	pos	pos	pos	neg	16S-Mex-CMh-	DI	5	21.15	30.01	32.2	29.56	0	NE	NE	NE	NE	0	NE	NE	NE	NE	neg	Ext. Kit Qiagen	14/04/2021	11	0-50 d	106	>100 d	117	100-200 d	ancien kit	50 µl	10-2
9615-1	1	2021-04-03	2021	Spring	4	D	2	2 years	26	>24months	F	30/01/2019	HF	Subclinical	31	pos	pos	pos	pos	pos	16S-Mex-CMh-Mass	TI	5	21.13	25.31	27.87	29.08	30.74	NE	NE	NE	NE	NE	NE	NE	NE	NE	NE	Ext. Kit Qiagen	14/04/2021	11	0-50 d	106	>100 d	117	100-200 d	ancien kit	50 µl	10-2
9618-1	1	2021-04-03	2021	Spring	4	D	2	2 years	26	>24months	F	05/02/2019	HF	Subclinical	31	pos	pos	pos	pos	neg	16S-Mex-CMh-	DI	5	21.37	27.6	30.51	27.6	0	NE	NE	NE	NE	0	NE	NE	NE	NE	neg	Ext. Kit Qiagen	14/04/2021	11	0-50 d	106	>100 d	117	100-200 d	ancien kit	50 µl	10-2
9622-1	1	2021-04-03	2021	Spring	4	D	2	2 years	26	>24months	F	09/02/2019	HF	Subclinical	31	pos	pos	pos	pos	neg	16S-Mex-CMh-	DI	5	20.88	28.97	29.78	26.98	0	NE	NE	NE	NE	0	NE	NE	NE	NE	neg	Ext. Kit Qiagen	14/04/2021	11	0-50 d	106	>100 d	117	100-200 d	ancien kit	50 µl	10-2
9672-1	1	2021-04-03	2021	Spring	4	D	2	2 years	22	18 months-24 months	F	19/06/2019	HF	Subclinical	31	pos	pos	pos	pos	pos	16S-Mex-CMh-Mass	TI	5	20.67	28.35	33.28	27.34	31.44	NE	NE	NE	NE	NE	NE	NE	NE	NE	NE	Ext. Kit Qiagen	14/04/2021	11	0-50 d	106	>100 d	117	100-200 d	ancien kit	50 µl	10-2
9674-1	1	2021-04-03	2021	Spring	4	D	2	2 years	22	18 months-24 months	F	27/06/2019	HF	Subclinical	31	pos	pos	pos	pos	neg	16S-Mex-CMh-	DI	5	21.11	25.78	26.81	27.88	0	NE	NE	NE	NE	0	NE	NE	NE	NE	neg	Ext. Kit Qiagen	14/04/2021	11	0-50 d	106	>100 d	117	100-200 d	ancien kit	50 µl	10-2
9682-1	1	2021-04-03	2021	Spring	4	D	2	2 years	21	18 months-24 months	F	11/07/2019	HF	Subclinical	31	pos	pos	pos	pos	neg	16S-Mex-CMh-	DI	5	20.74	28.98	31.13	28.22	0	NE	NE	NE	NE	0	NE	NE	NE	NE	neg	Ext. Kit Qiagen	14/04/2021	11	0-50 d	106	>100 d	117	100-200 d	ancien kit	50 µl	10-2
9688-1	1	2021-04-03	2021	Spring	4	D	2	2 years	20	18 months-24 months	F	06/08/2019	HF	Subclinical	31	pos	pos	pos	pos	pos	16S-Mex-CMh-Mass	TI	5	20.98	31.48	31.81	32.73	35.26	NE	NE	NE	NE	NE	NE	NE	NE	NE	NE	Ext. Kit Qiagen	14/04/2021	11	0-50 d	106	>100 d	117	100-200 d	ancien kit	50 µl	10-2
9693-1	1	2021-04-03	2021	Spring	4	D	2	2 years	20	18 months-24 months	F	14/08/2019	HF	Subclinical	31	pos	pos	pos	pos	neg	16S-Mex-CMh-	DI	5	20.41	27.7	28.47	28.07	0	NE	NE	NE	NE	0	NE	NE	NE	NE	neg	Ext. Kit Qiagen	14/04/2021	11	0-50 d	106	>100 d	117	100-200 d	ancien kit	50 µl	10-2
9694-1	1	2021-04-03	2021	Spring	4	D	2	2 years	20	18 months-24 months	F	14/08/2019	HF	Subclinical	31	pos	pos	pos	pos	neg	16S-Mex-CMh-	DI	5	20.57	29.98	30.79	30.67	0	NE	NE	NE	NE	0	NE	NE	NE	NE	neg	Ext. Kit Qiagen	14/04/2021	11	0-50 d	106	>100 d	117	100-200 d	ancien kit	50 µl	10-2
9697-1	1	2021-04-03	2021	Spring	4	D	2	2 years	20	18 months-24 months	F	16/08/2019	HF	Subclinical	31	pos	pos	neg	pos	pos	16S-CMh-Mass	DI	5	21.15	28.05	55.74	28.89	31.53	NE	NE	0	NE	NE	NE	NE	neg	NE	NE	Ext. Kit Qiagen	14/04/2021	11	0-50 d	106	>100 d	117	100-200 d	ancien kit	50 µl	10-2
9698-1	1	2021-04-03	2021	Spring	4	D	2	2 years	20	18 months-24 months	F	18/08/2019	HF	Subclinical	31	pos	pos	pos	pos	neg	16S-Mex-CMh-	DI	5	21.02	25.94	26.62	27.13	0	NE	NE	NE	NE	0	NE	NE	NE	NE	neg	Ext. Kit Qiagen	14/04/2021	11	0-50 d	106	>100 d	117	100-200 d	ancien kit	50 µl	10-2
9700-1	1	2021-04-03	2021	Spring	4	D	2	2 years	20	18 months-24 months	F	23/08/2019	HF	Subclinical	31	pos	pos	pos	pos	neg	16S-Mex-CMh-	DI	5	20.62	29.54	30.6	27.94	0	NE	NE	NE	NE	0	NE	NE	NE	NE	neg	Ext. Kit Qiagen	14/04/2021	11	0-50 d	106	>100 d	117	100-200 d	ancien kit	50 µl	10-2
9704-1	1	2021-04-03	2021	Spring	4	D	2	2 years	19	18 months-24 months	F	23/09/2019	HF	Subclinical	31	pos	pos	pos	pos	neg	16S-Mex-CMh-	DI	5	20.31	28.56	28.74	30.65	0	NE	NE	NE	NE	0	NE	NE	NE	NE	neg	Ext. Kit Qiagen	14/04/2021	11	0-50 d	106	>100 d	117	100-200 d	ancien kit	50 µl	10-2
9705-1	1	2021-04-03	2021	Spring	4	D	2	2 years	19	18 months-24 months	F	24/09/2019	HF	Subclinical	31	pos	pos	pos	pos	neg	16S-Mex-CMh-	DI	5	21.02	28.25	28.99	29.41	0	NE	NE	NE	NE	0	NE	NE	NE	NE	neg	Ext. Kit Qiagen	14/04/2021	11	0-50 d	106	>100 d	117	100-200 d	ancien kit	50 µl	10-2
9706-1	1	2021-04-03	2021	Spring	4	D	2	2 years	19	18 months-24 months	F	26/09/2019	HF	Subclinical	31	pos	pos	pos	pos	pos	16S-Mex-CMh-Mass	TI	5	20.98	26.95	31.05	30.3	29.62	NE	NE	NE	NE	NE	NE	NE	NE	NE	NE	Ext. Kit Qiagen	14/04/2021	11	0-50 d	106	>100 d	117	100-200 d	ancien kit	50 µl	10-2
9709-1	1	2021-04-03	2021	Spring	4	D	2	2 years	18	12-18 months	F	30/09/2019	HF	Subclinical	31	pos	pos	pos	pos	neg	16S-Mex-CMh-	DI	5	20.74	28.51	29.61	27.74	0	NE	NE	NE	NE	0	NE	NE	NE	NE	neg	Ext. Kit Qiagen	14/04/2021	11	0-50 d	106	>100 d	117	100-200 d	ancien kit	50 µl	10-2
9711-1	1	2021-04-03	2021	Spring	4	D	1	0 -1 year	18	12-18 months	F	19/10/2019	HF	Subclinical	31	pos	pos	pos	pos	neg	16S-Mex-CMh-	DI	5	20.49	26.63	27.98	29.4	0	NE	NE	NE	NE	0	NE	NE	NE	NE	neg	Ext. Kit Qiagen	14/04/2021	11	0-50 d	106	>100 d	117	100-200 d	ancien kit	50 µl	10-2
9723-1	1	2021-04-03	2021	Spring	4	D	1	0 -1 year	16	12-18 months	F	02/12/2019	HF	Subclinical	31	pos	pos	pos	pos	neg	16S-Mex-CMh-	DI	5	20.87	27.14	28.55	26.18	0	NE	NE	NE	NE	0	NE	NE	NE	NE	neg	Ext. Kit Qiagen	14/04/2021	11	0-50 d	106	>100 d	117	100-200 d	ancien kit	50 µl	10-2
6279-1	1	2022-07-26	2022	Summer	7	D	6	> 5 years	74	>24months	F	17/06/2016	HF	Subclinical	31	pos	neg	neg	neg	neg	NI	NI	5	21.78	0	0	0	0	21.8	0	0	0	0	1.3384564936046048	neg	neg	neg	neg	Ext. Kit Qiagen	05/10/2022	71	50-100 d	852	>100 d	923	>200 d	kit 172013961	100 µl	10-2
8701-1	1	2022-05-12	2022	Spring	5	D	4	4 -5 years	51	>24months	F	09/03/2018	HF	Subclinical	31	pos	pos	pos	pos	neg	16S-Mex-CMh-	DI	5	22.9	30.62	29.99	28.84	0	22.9	30.6	30	89000	0	1.35984	1.48572	1.47712	4.94939	neg	Ext, Kit Qiagen	19/06/2022	38	0-50 d	960	>100 d	998	>200 d	kit 172013961	100 µl	10-2
9821-1	1	2022-04-15	2022	Spring	4	D	3	3 years	33	>24months	F	17/07/2019	HF	Subclinical	31	pos	pos	neg	pos	neg	16S-CMh-	MI	5	22.65	34.48	0	31.12	0	22.7	34.5	0	98000	0	1.35603	1.53782	neg	4.99123	neg	Ext, Kit Qiagen	22/04/2022	7	0-50 d	1018	>100 d	1025	>200 d	Kit"défectueux"169019446	100 µl	10-2
1724-1	1	2022-03-07	2022	Spring	3	D	0	0 -1 year	0	0-6 months	M	02/03/2022	HF	Subclinical	31	pos	pos	neg	pos	neg	16S-CMh-	MI	5	25.41	31.91	0	29.36	0	5950	383	0	1430	0	3.77452	2.5832	neg	3.15534	neg	Ext, Kit Qiagen	22/04/2022	46	0-50 d	1008	>100 d	1054	>200 d	Kit"défectueux"169019446	100 µl	10-2
9831-1	1	2022-03-07	2022	Spring	3	D	2	2 years	30	>24months	F	04/10/2019	HF	Subclinical	31	pos	pos	pos	pos	neg	16S-Mex-CMh-	DI	5	22.4	33.68	33.18	31.17	0	22.4	33.7	non-quantifiable	98000	0	1.35025	1.52763	non-quantifiable	4.99123	neg	Ext, Kit Qiagen	22/04/2022	46	0-50 d	1018	>100 d	1064	>200 d	Kit"défectueux"169019446	100 µl	10-2
9838-1	1	2022-03-07	2022	Spring	3	D	2	2 years	27	>24months	F	12/12/2019	HF	Subclinical	31	pos	pos	pos	pos	neg	16S-Mex-CMh-	DI	5	22.43	31.8	33.4	28.63	0	22.4	31.8	non-quantifiable	89000	0	1.35025	1.50243	non-quantifiable	4.94939	neg	Ext, Kit Qiagen	22/04/2022	46	0-50 d	1018	>100 d	1064	>200 d	Kit"défectueux"169019446	100 µl	10-2
9824-1	1	2022-02-17	2022	Winter	2	D	3	3 years	31	>24months	F	05/08/2019	HF	Subclinical	31	pos	pos	pos	neg	neg	16S-Mex-	MI	5	23.01	34.05	32.61	0	0	23	34.1	32.6	0	0	1.36173	1.53275	1.51322	neg	neg	Ext, Kit Qiagen	20/04/2022	62	50-100 d	1020	>100 d	1082	>200 d	Kit"défectueux"169019446	100 µl	10-2
9823-1	1	2022-02-15	2022	Winter	2	D	3	3 years	31	>24months	F	17/07/2019	HF	Subclinical	31	pos	pos	pos	neg	neg	16S-Mex-	MI	5	23.73	32.5	31.61	36.86	0	23.7	32.5	31.6	0	0	1.37475	1.51188	1.49969	neg	neg	Ext, Kit Qiagen	22/04/2022	66	50-100 d	1018	>100 d	1084	>200 d	Kit"défectueux"169019446	100 µl	10-2
9825-1	1	2022-02-04	2022	Winter	2	D	2	2 years	30	>24months	F	07/08/2019	HF	Subclinical	31	pos	pos	pos	pos	neg	16S-Mex-CMh-	DI	5	23.35	31.91	30.38	30.27	0	23.4	31.9	30.4	94000	0	1.36922	1.50379	1.48287	4.97313	neg	Ext, Kit Qiagen	22/04/2022	77	50-100 d	1018	>100 d	1095	>200 d	Kit"défectueux"169019446	100 µl	10-2
6193-1	1	2021-10-22	2021	Automn	10	D	6	> 5 years	71	>24months	F	20/12/2015	HF	Subclinical	31	pos	pos	neg	pos	neg	16S-CMh-	MI	5	18.96	26.92	0	28.69	0	20.3	32.1	0	89000	0	1.3075	1.50651	neg	4.94939	neg	Ext, Kit Qiagen	22/10/2021	1	0-50 d	4	0-50 d	4	0-100 d	kit défectueux 169019446	100 µl	10-2
8695-1	1	2021-05-23	2021	Spring	5	D	3	3 years	39	>24months	F	04/03/2018	HF	Subclinical	31	pos	pos	neg	neg	neg	16S-	unknown	5	22	32.48	0	0	0	22	NE	0	0	0	1.3424226808222062	NE	neg	neg	neg	Ext. Kit Qiagen	09/07/2021	47	0-50 d	1305	>100 d	1352	>200 d	kit ok 169013948	100 µl	10-2
8497-1	1	2021-04-03	2021	Spring	4	D	2	2 years	28	>24months	F	18/12/2018	HF	Subclinical	31	pos	pos	neg	pos	neg	16S-CMh-	MI	5	21.36	30.92	0	29.76	0	NE	NE	0	NE	0	NE	NE	neg	NE	neg	Ext. Kit Qiagen	21/04/2021	18	0-50 d	104	>100 d	122	100-200 d	ancien kit	50 µl	10-2
6231-1	1	2021-04-03	2021	Spring	4	D	5	4 -5 years	62	>24months	F	21/02/2016	HF	Subclinical	31	pos	pos	pos	pos	neg	16S-Mex-CMh-	DI	5	20.95	25.88	27.9	33.05	0	NE	NE	3740	NE	0	NE	NE	3.5728716022004803	NE	neg	Ext. Kit Qiagen	29/04/2021	26	0-50 d	98	50-100 d	124	100-200 d	ancien kit	50 µl	10-2
6305-1	1	2021-04-03	2021	Spring	4	D	5	4 -5 years	56	>24months	F	16/08/2016	HF	Subclinical	31	pos	pos	pos	neg	neg	16S-Mex-	MI	5	20.96	29.59	34.78	0	0	NE	NE	13.8	0	0	NE	NE	1.1398790864012365	neg	neg	Ext. Kit Qiagen	29/04/2021	26	0-50 d	98	50-100 d	124	100-200 d	ancien kit	50 µl	10-2
7040-1	1	2021-04-03	2021	Spring	4	D	4	4 -5 years	50	>24months	F	28/02/2017	HF	Subclinical	31	pos	pos	pos	pos	neg	16S-Mex-CMh-	DI	5	21.15	28.7	31.38	28.5	0	NE	NE	220	NE	0	NE	NE	2.3424226808222062	NE	neg	Ext. Kit Qiagen	29/04/2021	26	0-50 d	98	50-100 d	124	100-200 d	ancien kit	50 µl	10-2
7044-1	1	2021-04-03	2021	Spring	4	D	4	4 -5 years	50	>24months	F	02/03/2017	HF	Subclinical	31	pos	pos	neg	pos	neg	16S-CMh-	MI	5	21.14	31.67	0	29.89	0	NE	NE	0	NE	0	NE	NE	neg	NE	neg	Ext. Kit Qiagen	29/04/2021	26	0-50 d	98	50-100 d	124	100-200 d	ancien kit	50 µl	10-2
7098-1	1	2021-04-03	2021	Spring	4	D	4	4 -5 years	44	>24months	F	19/08/2017	HF	Subclinical	31	pos	pos	pos	neg	neg	16S-Mex-	MI	5	22.25	27.09	28.7	0	0	NE	NE	1950	0	0	NE	NE	3.2900346113625178	neg	neg	Ext. Kit Qiagen	29/04/2021	26	0-50 d	98	50-100 d	124	100-200 d	ancien kit	50 µl	10-2
8678-1	1	2021-04-03	2021	Spring	4	D	3	3 years	39	>24months	F	25/01/2018	HF	Subclinical	31	pos	pos	pos	pos	neg	16S-Mex-CMh-	DI	5	20.99	28.83	31.11	29.18	0	NE	NE	274	NE	0	NE	NE	2.4377505628203879	NE	neg	Ext. Kit Qiagen	29/04/2021	26	0-50 d	98	50-100 d	124	100-200 d	ancien kit	50 µl	10-2
8681-1	1	2021-04-03	2021	Spring	4	D	3	3 years	39	>24months	F	01/02/2018	HF	Subclinical	31	pos	pos	pos	neg	neg	16S-Mex-	MI	5	21.82	28.48	30.06	0	0	NE	NE	644	0	0	NE	NE	2.808885867359812	neg	neg	Ext. Kit Qiagen	29/04/2021	26	0-50 d	98	50-100 d	124	100-200 d	ancien kit	50 µl	10-2
8687-1	1	2021-04-03	2021	Spring	4	D	3	3 years	38	>24months	F	13/02/2018	HF	Subclinical	31	pos	pos	pos	pos	neg	16S-Mex-CMh-	DI	5	20.9	32.75	34.78	31.32	0	NE	NE	non-quantifiable	NE	0	NE	NE	non-quantifiable	NE	neg	Ext. Kit Qiagen	29/04/2021	26	0-50 d	98	50-100 d	124	100-200 d	ancien kit	50 µl	10-2
8716-1	1	2021-04-03	2021	Spring	4	D	3	3 years	36	>24months	F	11/04/2018	HF	Subclinical	31	pos	pos	neg	pos	neg	16S-CMh-	MI	5	21.82	30.3	0	30.37	0	NE	NE	0	NE	0	NE	NE	neg	NE	neg	Ext. Kit Qiagen	29/04/2021	26	0-50 d	98	50-100 d	124	100-200 d	ancien kit	50 µl	10-2
8736-1	1	2021-04-03	2021	Spring	4	D	3	3 years	34	>24months	F	29/06/2018	HF	Subclinical	31	pos	pos	pos	pos	pos	16S-Mex-CMh-Mass	TI	5	20.84	28.93	35.59	28.19	34.36	NE	NE	non-quantifiable	NE	NE	NE	NE	non-quantifiable	NE	NE	Ext. Kit Qiagen	29/04/2021	26	0-50 d	98	50-100 d	124	100-200 d	ancien kit	50 µl	10-2
8779-1	1	2021-04-03	2021	Spring	4	D	3	3 years	30	>24months	F	03/10/2018	HF	Subclinical	31	pos	pos	pos	pos	neg	16S-Mex-CMh-	DI	5	21.5	31.05	35.99	29.32	0	NE	NE	non-quantifiable	NE	0	NE	NE	non-quantifiable	NE	neg	Ext. Kit Qiagen	29/04/2021	26	0-50 d	98	50-100 d	124	100-200 d	ancien kit	50 µl	10-2
211-1	1	2021-04-03	2021	Spring	4	D	0	0 -1 year	6	0-6 months	F	17/10/2020	HF	Subclinical	31	pos	pos	neg	neg	neg	16S-	unknown	5	18.93	36	0	0	0	NE	NE	0	0	0	NE	NE	neg	neg	neg	Ext. Kit Qiagen	28/04/2021	25	0-50 d	97	50-100 d	122	100-200 d	ancien kit	50 µl	10-2
226-1	1	2021-04-03	2021	Spring	4	D	0	0 -1 year	4	0-6 months	F	13/12/2020	HF	Subclinical	31	pos	pos	neg	pos	neg	16S-CMh-	MI	5	19.42	29.12	0	28.92	0	NE	NE	0	NE	0	NE	NE	neg	NE	neg	Ext. Kit Qiagen	28/04/2021	25	0-50 d	97	50-100 d	122	100-200 d	ancien kit	50 µl	10-2
5578-1	1	2021-04-03	2021	Spring	4	D	6	> 5 years	68	>24months	F	12/09/2015	HF	Subclinical	31	pos	pos	neg	pos	neg	16S-CMh-	MI	5	20.32	33.58	0	32.64	0	NE	NE	0	NE	0	NE	NE	neg	NE	neg	Ext. Kit Qiagen	28/04/2021	25	0-50 d	99	50-100 d	124	100-200 d	ancien kit	50 µl	10-2
5608-1	1	2021-04-03	2021	Spring	4	D	5	4 -5 years	65	>24months	F	26/11/2015	HF	Subclinical	31	pos	pos	pos	pos	neg	16S-Mex-CMh-	DI	5	20.81	28.73	33.3	29.53	0	NE	NE	non-quantifiable	NE	0	NE	NE	non-quantifiable	NE	neg	Ext. Kit Qiagen	28/04/2021	25	0-50 d	99	50-100 d	124	100-200 d	ancien kit	50 µl	10-2
6282-1	1	2021-04-03	2021	Spring	4	D	5	4 -5 years	58	>24months	F	17/06/2016	HF	Subclinical	31	pos	pos	pos	pos	neg	16S-Mex-CMh-	DI	5	20.88	29.4	31.89	28.94	0	NE	NE	145	NE	0	NE	NE	2.1613680022349748	NE	neg	Ext. Kit Qiagen	28/04/2021	25	0-50 d	99	50-100 d	124	100-200 d	ancien kit	50 µl	10-2
7116-1	1	2021-04-03	2021	Spring	4	D	3	3 years	40	>24months	F	26/12/2017	HF	Subclinical	31	pos	pos	pos	neg	neg	16S-Mex-	MI	5	20.68	31.95	33.95	0	0	NE	NE	non-quantifiable	0	0	NE	NE	non-quantifiable	neg	neg	Ext. Kit Qiagen	28/04/2021	25	0-50 d	99	50-100 d	124	100-200 d	ancien kit	50 µl	10-2
7118-1	1	2021-04-03	2021	Spring	4	D	4	4 -5 years	43	>24months	F	26/09/2017	HF	Subclinical	31	pos	pos	neg	neg	neg	16S-	unknown	5	21.22	30.34	0	0	0	NE	NE	0	0	0	NE	NE	neg	neg	neg	Ext. Kit Qiagen	29/04/2021	26	0-50 d	98	50-100 d	124	100-200 d	ancien kit	50 µl	10-2
7130-1	1	2021-04-03	2021	Spring	4	D	3	3 years	41	>24months	F	13/11/2017	HF	Subclinical	31	pos	pos	pos	pos	neg	16S-Mex-CMh-	DI	5	20.7	31.16	33.8	31.36	0	NE	NE	non-quantifiable	NE	0	NE	NE	non-quantifiable	NE	neg	Ext. Kit Qiagen	28/04/2021	25	0-50 d	99	50-100 d	124	100-200 d	ancien kit	50 µl	10-2
8684-1	1	2021-04-03	2021	Spring	4	D	3	3 years	39	>24months	F	02/02/2018	HF	Subclinical	31	pos	pos	neg	pos	neg	16S-CMh-	MI	5	20.11	29.28	0	28.65	0	NE	NE	0	NE	0	NE	NE	neg	NE	neg	Ext. Kit Qiagen	28/04/2021	25	0-50 d	99	50-100 d	124	100-200 d	ancien kit	50 µl	10-2
8686-1	1	2021-04-03	2021	Spring	4	D	3	3 years	38	>24months	F	11/02/2018	HF	Subclinical	31	pos	pos	pos	pos	neg	16S-Mex-CMh-	DI	5	20.14	28.12	32.3	28.5	0	NE	NE	104	NE	0	NE	NE	2.0170333392987803	NE	neg	Ext. Kit Qiagen	28/04/2021	25	0-50 d	97	50-100 d	122	100-200 d	ancien kit	50 µl	10-2
8756-1	1	2021-04-03	2021	Spring	4	D	3	3 years	32	>24months	F	06/08/2018	HF	Subclinical	31	pos	pos	pos	pos	neg	16S-Mex-CMh-	DI	5	20.67	30.1	34.46	29.56	0	NE	NE	non-quantifiable	NE	0	NE	NE	non-quantifiable	NE	neg	Ext. Kit Qiagen	28/04/2021	25	0-50 d	99	50-100 d	124	100-200 d	ancien kit	50 µl	10-2
163-1	1	2021-04-03	2021	Spring	4	D	1	0 -1 year	14	12-18 months	F	29/01/2020	HF	Subclinical	31	pos	pos	pos	pos	neg	16S-Mex-CMh-	DI	5	20.15	28.46	34.3	28.03	0	NE	NE	non-quantifiable	NE	0	NE	NE	non-quantifiable	NE	neg	Ext. Kit Qiagen	27/04/2021	24	0-50 d	98	50-100 d	122	100-200 d	ancien kit	50 µl	10-2
1666-1	1	2021-04-03	2021	Spring	4	D	0	0 -1 year	1	0-6 months	F	23/02/2021	crossbred	Subclinical	31	pos	pos	neg	neg	neg	16S-	unknown	5	19.04	34.64	0	0	0	NE	NE	0	0	0	NE	NE	neg	neg	neg	Ext. Kit Qiagen	27/04/2021	24	0-50 d	98	50-100 d	122	100-200 d	ancien kit	50 µl	10-2
173-1	1	2021-04-03	2021	Spring	4	D	1	0 -1 year	13	12-18 months	F	04/03/2020	HF	Subclinical	31	pos	pos	pos	pos	neg	16S-Mex-CMh-	DI	5	19.93	27.33	30.92	25.33	0	NE	NE	320	NE	0	NE	NE	2.5051499783199058	NE	neg	Ext. Kit Qiagen	27/04/2021	24	0-50 d	98	50-100 d	122	100-200 d	ancien kit	50 µl	10-2
181-1	1	2021-04-03	2021	Spring	4	D	1	0 -1 year	12	6-12 months	F	26/03/2020	crossbred	Subclinical	31	pos	pos	neg	pos	neg	16S-CMh-	MI	5	19.47	29.72	0	28.69	0	NE	NE	0	NE	0	NE	NE	neg	NE	neg	Ext. Kit Qiagen	27/04/2021	24	0-50 d	98	50-100 d	122	100-200 d	ancien kit	50 µl	10-2
188-1	1	2021-04-03	2021	Spring	4	D	1	0 -1 year	11	6-12 months	F	10/05/2020	HF	Subclinical	31	pos	pos	neg	pos	neg	16S-CMh-	MI	5	19.52	29.84	0	29.34	0	NE	NE	0	NE	0	NE	NE	neg	NE	neg	Ext. Kit Qiagen	27/04/2021	24	0-50 d	98	50-100 d	122	100-200 d	ancien kit	50 µl	10-2
189-1	1	2021-04-03	2021	Spring	4	D	1	0 -1 year	10	6-12 months	F	05/06/2020	HF	Subclinical	31	pos	pos	neg	pos	neg	16S-CMh-	MI	5	20.21	33.52	0	33.44	0	NE	NE	0	NE	0	NE	NE	neg	NE	neg	Ext. Kit Qiagen	27/04/2021	24	0-50 d	98	50-100 d	122	100-200 d	ancien kit	50 µl	10-2
190-1	1	2021-04-03	2021	Spring	4	D	1	0 -1 year	10	6-12 months	F	17/06/2020	HF	Subclinical	31	pos	pos	pos	neg	neg	16S-Mex-	MI	5	19.34	30.58	30.7	0	0	NE	NE	383	0	0	NE	NE	2.5831987739686229	neg	neg	Ext. Kit Qiagen	27/04/2021	24	0-50 d	98	50-100 d	122	100-200 d	ancien kit	50 µl	10-2
191-1	1	2021-04-03	2021	Spring	4	D	1	0 -1 year	10	6-12 months	F	20/06/2020	HF	Subclinical	31	pos	neg	neg	neg	neg	NI	NI	5	19.9	0	0	0	0	NE	0	0	0	0	NE	neg	neg	neg	neg	Ext. Kit Qiagen	27/04/2021	24	0-50 d	98	50-100 d	122	100-200 d	ancien kit	50 µl	10-2
192-1	1	2021-04-03	2021	Spring	4	D	1	0 -1 year	10	6-12 months	F	22/06/2020	HF	Subclinical	31	pos	pos	pos	neg	neg	16S-Mex-	MI	5	19.28	27.16	28.27	0	0	NE	NE	2770	0	0	NE	NE	3.4424797690644486	neg	neg	Ext. Kit Qiagen	27/04/2021	24	0-50 d	98	50-100 d	122	100-200 d	ancien kit	50 µl	10-2
193-1	1	2021-04-03	2021	Spring	4	D	1	0 -1 year	9	6-12 months	F	30/06/2020	HF	Subclinical	31	pos	neg	neg	neg	neg	NI	NI	5	19.6	38.96	0	0	0	NE	0	0	0	0	NE	neg	neg	neg	neg	Ext. Kit Qiagen	27/04/2021	24	0-50 d	98	50-100 d	122	100-200 d	ancien kit	50 µl	10-2
194-1	1	2021-04-03	2021	Spring	4	D	1	0 -1 year	9	6-12 months	F	08/07/2020	HF	Subclinical	31	pos	pos	neg	neg	neg	16S-	unknown	5	19.01	35.28	0	0	0	NE	NE	0	0	0	NE	NE	neg	neg	neg	Ext. Kit Qiagen	27/04/2021	24	0-50 d	98	50-100 d	122	100-200 d	ancien kit	50 µl	10-2
196-1	1	2021-04-03	2021	Spring	4	D	1	0 -1 year	9	6-12 months	F	18/07/2020	HF	Subclinical	31	pos	pos	neg	neg	pos	16S-Mass	MI	5	19.54	25.83	0	0	28.56	NE	NE	0	0	NE	NE	NE	neg	neg	NE	Ext. Kit Qiagen	27/04/2021	24	0-50 d	98	50-100 d	122	100-200 d	ancien kit	50 µl	10-2
201-1	1	2021-04-03	2021	Spring	4	D	1	0 -1 year	7	6-12 months	F	03/09/2020	HF	Subclinical	31	pos	neg	neg	neg	neg	NI	NI	5	19.56	0	0	0	0	NE	0	0	0	0	NE	neg	neg	neg	neg	Ext. Kit Qiagen	27/04/2021	24	0-50 d	98	50-100 d	122	100-200 d	ancien kit	50 µl	10-2
208-1	1	2021-04-03	2021	Spring	4	D	0	0 -1 year	6	0-6 months	F	12/10/2020	HF	Subclinical	31	pos	pos	neg	neg	neg	16S-	unknown	5	18.76	34.68	0	0	0	NE	NE	0	0	0	NE	NE	neg	neg	neg	Ext. Kit Qiagen	27/04/2021	24	0-50 d	98	50-100 d	122	100-200 d	ancien kit	50 µl	10-2
209-1	1	2021-04-03	2021	Spring	4	D	0	0 -1 year	6	0-6 months	F	14/10/2020	HF	Subclinical	31	pos	pos	neg	pos	neg	16S-CMh-	MI	5	19.34	28.72	0	27.29	0	NE	NE	0	NE	0	NE	NE	neg	NE	neg	Ext. Kit Qiagen	27/04/2021	24	0-50 d	98	50-100 d	122	100-200 d	ancien kit	50 µl	10-2
217-1	1	2021-04-03	2021	Spring	4	D	0	0 -1 year	5	0-6 months	F	14/11/2020	crossbred	Subclinical	31	pos	pos	neg	neg	neg	16S-	unknown	5	19.34	35.3	0	0	0	NE	NE	0	0	0	NE	NE	neg	neg	neg	Ext. Kit Qiagen	27/04/2021	24	0-50 d	98	50-100 d	122	100-200 d	ancien kit	50 µl	10-2
222-1	1	2021-04-03	2021	Spring	4	D	0	0 -1 year	4	0-6 months	M	06/12/2020	Inra 95	Subclinical	31	pos	neg	neg	neg	neg	NI	NI	5	19.22	0	0	0	0	NE	0	0	0	0	NE	neg	neg	neg	neg	Ext. Kit Qiagen	27/04/2021	24	0-50 d	98	50-100 d	122	100-200 d	ancien kit	50 µl	10-2
224-1	1	2021-04-03	2021	Spring	4	D	0	0 -1 year	4	0-6 months	F	07/12/2020	HF	Subclinical	31	pos	pos	neg	neg	pos	16S-Mass	MI	5	18.89	36.14	0	0	36.88	NE	NE	0	0	NE	NE	NE	neg	neg	NE	Ext. Kit Qiagen	27/04/2021	24	0-50 d	98	50-100 d	122	100-200 d	ancien kit	50 µl	10-2
225-1	1	2021-04-03	2021	Spring	4	D	0	0 -1 year	4	0-6 months	F	09/12/2020	HF	Subclinical	31	pos	neg	neg	neg	neg	NI	NI	5	22.23	0	0	0	0	NE	0	0	0	0	NE	neg	neg	neg	neg	Ext. Kit Qiagen	27/04/2021	24	0-50 d	98	50-100 d	122	100-200 d	ancien kit	50 µl	10-2
233-1	1	2021-04-03	2021	Spring	4	D	0	0 -1 year	3	0-6 months	F	12/01/2021	crossbred	Subclinical	31	pos	pos	neg	neg	neg	16S-	unknown	5	20.35	37.44	0	0	0	NE	NE	0	0	0	NE	NE	neg	neg	neg	Ext. Kit Qiagen	27/04/2021	24	0-50 d	98	50-100 d	122	100-200 d	ancien kit	50 µl	10-2
241-1	1	2021-04-03	2021	Spring	4	D	0	0 -1 year	2	0-6 months	F	03/02/2021	crossbred	Subclinical	31	pos	pos	neg	neg	neg	16S-	unknown	5	19	35.49	0	0	0	NE	NE	0	0	0	NE	NE	neg	neg	neg	Ext. Kit Qiagen	27/04/2021	24	0-50 d	98	50-100 d	122	100-200 d	ancien kit	50 µl	10-2
243-1	1	2021-04-03	2021	Spring	4	D	0	0 -1 year	2	0-6 months	F	05/02/2021	crossbred	Subclinical	31	pos	pos	neg	pos	neg	16S-CMh-	MI	5	19.67	29.16	0	28.07	0	NE	NE	0	NE	0	NE	NE	neg	NE	neg	Ext. Kit Qiagen	27/04/2021	24	0-50 d	98	50-100 d	122	100-200 d	ancien kit	50 µl	10-2
160-1	1	2021-04-03	2021	Spring	4	D	1	0 -1 year	15	12-18 months	F	19/01/2020	HF	Subclinical	31	pos	pos	pos	pos	neg	16S-Mex-CMh-	DI	5	20.32	29.31	33.84	27.91	0	NE	NE	non-quantifiable	NE	0	NE	NE	non-quantifiable	NE	neg	Ext. Kit Qiagen	26/04/2021	23	0-50 d	99	50-100 d	122	100-200 d	ancien kit	50 µl	10-2
164-1	1	2021-04-03	2021	Spring	4	D	1	0 -1 year	14	12-18 months	F	30/01/2020	crossbred	Subclinical	31	pos	pos	pos	pos	neg	16S-Mex-CMh-	DI	5	19.79	29.77	32.44	29.66	0	NE	NE	92.8	NE	0	NE	NE	1.9675479762188621	NE	neg	Ext. Kit Qiagen	26/04/2021	23	0-50 d	99	50-100 d	122	100-200 d	ancien kit	50 µl	10-2
177-1	1	2021-04-03	2021	Spring	4	D	1	0 -1 year	13	12-18 months	F	11/03/2020	HF	Subclinical	31	pos	pos	pos	pos	neg	16S-Mex-CMh-	DI	5	19.62	27.35	30	27.64	0	NE	NE	677	NE	0	NE	NE	2.8305886686851442	NE	neg	Ext. Kit Qiagen	26/04/2021	23	0-50 d	99	50-100 d	122	100-200 d	ancien kit	50 µl	10-2
183-1	1	2021-04-03	2021	Spring	4	D	1	0 -1 year	12	6-12 months	F	04/04/2020	HF	Subclinical	31	pos	pos	pos	pos	neg	16S-Mex-CMh-	DI	5	20.38	27.78	30.87	27.04	0	NE	NE	333	NE	0	NE	NE	2.5224442335063197	NE	neg	Ext. Kit Qiagen	26/04/2021	23	0-50 d	99	50-100 d	122	100-200 d	ancien kit	50 µl	10-2
185-1	1	2021-04-03	2021	Spring	4	D	1	0 -1 year	11	6-12 months	F	29/04/2020	HF	Subclinical	31	pos	pos	pos	pos	pos	16S-Mex-CMh-Mass	TI	5	19.98	28.06	32.3	27.92	32.78	NE	NE	104	NE	NE	NE	NE	2.0170333392987803	NE	NE	Ext. Kit Qiagen	26/04/2021	23	0-50 d	99	50-100 d	122	100-200 d	ancien kit	50 µl	10-2
186-1	1	2021-04-03	2021	Spring	4	D	1	0 -1 year	11	6-12 months	F	29/04/2020	HF	Subclinical	31	pos	pos	pos	pos	neg	16S-Mex-CMh-	DI	5	19.9	28.21	30.37	28.38	0	NE	NE	501	NE	0	NE	NE	2.6998377258672459	NE	neg	Ext. Kit Qiagen	26/04/2021	23	0-50 d	99	50-100 d	122	100-200 d	ancien kit	50 µl	10-2
187-1	1	2021-04-03	2021	Spring	4	D	1	0 -1 year	11	6-12 months	F	08/05/2020	HF	Subclinical	31	pos	pos	pos	pos	neg	16S-Mex-CMh-	DI	5	19.32	26.14	27.99	27.12	0	NE	NE	3480	NE	0	NE	NE	3.5415792439465807	NE	neg	Ext. Kit Qiagen	26/04/2021	23	0-50 d	99	50-100 d	122	100-200 d	ancien kit	50 µl	10-2
195-1	1	2021-04-03	2021	Spring	4	D	1	0 -1 year	9	6-12 months	F	10/07/2020	HF	Subclinical	31	pos	neg	neg	neg	neg	NI	NI	5	19.63	0	0	0	0	NE	0	0	0	0	NE	neg	neg	neg	neg	Ext. Kit Qiagen	26/04/2021	23	0-50 d	99	50-100 d	122	100-200 d	ancien kit	50 µl	10-2
197-1	1	2021-04-03	2021	Spring	4	D	1	0 -1 year	8	6-12 months	F	26/07/2020	HF	Subclinical	31	pos	neg	neg	neg	neg	NI	NI	5	19.63	0	0	0	0	NE	0	0	0	0	NE	neg	neg	neg	neg	Ext. Kit Qiagen	26/04/2021	23	0-50 d	99	50-100 d	122	100-200 d	ancien kit	50 µl	10-2
212-1	1	2021-04-03	2021	Spring	4	D	0	0 -1 year	6	0-6 months	F	17/10/2020	HF	Subclinical	31	pos	neg	neg	neg	neg	NI	NI	5	19.29	0	0	0	0	NE	0	0	0	0	NE	neg	neg	neg	neg	Ext. Kit Qiagen	26/04/2021	23	0-50 d	99	50-100 d	122	100-200 d	ancien kit	50 µl	10-2
221-1	1	2021-04-03	2021	Spring	4	D	0	0 -1 year	4	0-6 months	M	06/12/2020	Inra 95	Subclinical	31	pos	pos	neg	neg	neg	16S-	unknown	5	20.05	35.89	0	0	0	NE	NE	0	0	0	NE	NE	neg	neg	neg	Ext. Kit Qiagen	26/04/2021	23	0-50 d	99	50-100 d	122	100-200 d	ancien kit	50 µl	10-2
223-1	1	2021-04-03	2021	Spring	4	D	0	0 -1 year	4	0-6 months	M	06/12/2020	Inra 95	Subclinical	31	pos	neg	neg	neg	neg	NI	NI	5	18.2	42.52	0	0	0	NE	0	0	0	0	NE	neg	neg	neg	neg	Ext. Kit Qiagen	26/04/2021	23	0-50 d	99	50-100 d	122	100-200 d	ancien kit	50 µl	10-2
244-1	1	2021-04-03	2021	Spring	4	D	0	0 -1 year	2	0-6 months	F	16/02/2021	crossbred	Subclinical	31	pos	pos	neg	neg	neg	16S-	unknown	5	20.77	37.9	0	0	0	NE	NE	0	0	0	NE	NE	neg	neg	neg	Ext. Kit Qiagen	26/04/2021	23	0-50 d	99	50-100 d	122	100-200 d	ancien kit	50 µl	10-2
245-1	1	2021-04-03	2021	Spring	4	D	0	0 -1 year	2	0-6 months	M	16/02/2021	crossbred	Subclinical	31	pos	neg	neg	neg	neg	NI	NI	5	18.96	0	0	0	0	NE	0	0	0	0	NE	neg	neg	neg	neg	Ext. Kit Qiagen	26/04/2021	23	0-50 d	99	50-100 d	122	100-200 d	ancien kit	50 µl	10-2
246-1	1	2021-04-03	2021	Spring	4	D	0	0 -1 year	1	0-6 months	F	25/02/2021	crossbred	Subclinical	31	pos	neg	neg	neg	neg	NI	NI	5	19.35	0	0	0	0	NE	0	0	0	0	NE	neg	neg	neg	neg	Ext. Kit Qiagen	26/04/2021	23	0-50 d	99	50-100 d	122	100-200 d	ancien kit	50 µl	10-2
6349-1	1	2021-04-03	2021	Spring	4	D	4	4 -5 years	53	>24months	F	12/11/2016	crossbred	Subclinical	31	pos	pos	pos	pos	neg	16S-Mex-CMh-	DI	5	20.23	30.67	32.45	33	0	NE	NE	92.1	NE	0	NE	NE	1.9642596301968489	NE	neg	Ext. Kit Qiagen	26/04/2021	23	0-50 d	99	50-100 d	122	100-200 d	ancien kit	50 µl	10-2
8665-1	1	2021-04-03	2021	Spring	4	D	3	3 years	39	>24months	F	14/01/2018	HF	Subclinical	31	pos	pos	neg	pos	neg	16S-CMh-	MI	5	20.01	30.45	0	28.91	0	NE	NE	0	NE	0	NE	NE	neg	NE	neg	Ext. Kit Qiagen	26/04/2021	23	0-50 d	99	50-100 d	122	100-200 d	ancien kit	50 µl	10-2
8703-1	1	2021-04-03	2021	Spring	4	D	3	3 years	37	>24months	F	12/03/2018	HF	Subclinical	31	pos	pos	pos	pos	neg	16S-Mex-CMh-	DI	5	20.4	31.57	33.84	32.61	0	NE	NE	non-quantifiable	NE	0	NE	NE	non-quantifiable	NE	neg	Ext. Kit Qiagen	19/04/2021	16	0-50 d	106	>100 d	122	100-200 d	ancien kit	50 µl	10-2
9606-1	1	2021-04-03	2021	Spring	4	D	2	2 years	27	>24months	F	04/01/2019	HF	Subclinical	31	pos	pos	pos	pos	pos	16S-Mex-CMh-Mass	TI	5	19.44	27.32	29.2	30.92	20.07	NE	NE	1300	NE	NE	NE	NE	3.1139433523068369	NE	NE	Ext. Kit Qiagen	26/04/2021	23	0-50 d	99	50-100 d	122	100-200 d	ancien kit	50 µl	10-2
207-1	1	2021-04-03	2021	Spring	4	D	1	0 -1 year	6	0-6 months	F	30/09/2020	HF	Subclinical	31	pos	pos	neg	pos	neg	16S-CMh-	MI	5	20.13	30.75	0	29.2	0	NE	NE	0	NE	0	NE	NE	neg	NE	neg	Ext. Kit Qiagen	21/04/2021	18	0-50 d	104	>100 d	122	100-200 d	ancien kit	50 µl	10-2
5474-1	1	2021-04-03	2021	Spring	4	D	6	> 5 years	75	>24months	F	06/02/2015	HF	Subclinical	31	pos	pos	pos	pos	neg	16S-Mex-CMh-	DI	5	20.04	30.36	32.15	32.23	0	NE	NE	118	NE	0	NE	NE	2.0718820073061255	NE	neg	Ext. Kit Qiagen	21/04/2021	18	0-50 d	104	>100 d	122	100-200 d	ancien kit	50 µl	10-2
6207-1	1	2021-04-03	2021	Spring	4	D	5	4 -5 years	64	>24months	F	08/01/2016	HF	Subclinical	31	pos	pos	neg	neg	neg	16S-	unknown	5	19.85	32.52	0	0	0	NE	NE	0	0	0	NE	NE	neg	neg	neg	Ext. Kit Qiagen	21/04/2021	18	0-50 d	104	>100 d	122	100-200 d	ancien kit	50 µl	10-2
6265-1	1	2021-04-03	2021	Spring	4	D	5	4 -5 years	60	>24months	F	19/04/2016	HF	Subclinical	31	pos	neg	pos	neg	neg	Mex-	unknown	5	20.15	0	27.73	0	0	NE	0	4300	0	0	NE	neg	3.6334684555795866	neg	neg	Ext. Kit Qiagen	21/04/2021	18	0-50 d	104	>100 d	122	100-200 d	ancien kit	50 µl	10-2
6311-1	1	2021-04-03	2021	Spring	4	D	5	4 -5 years	56	>24months	F	03/09/2016	crossbred	Subclinical	31	pos	pos	neg	pos	neg	16S-CMh-	MI	5	20.7	29.23	0	27.33	0	NE	NE	0	NE	0	NE	NE	neg	NE	neg	Ext. Kit Qiagen	21/04/2021	18	0-50 d	104	>100 d	122	100-200 d	ancien kit	50 µl	10-2
6365-1	1	2021-04-03	2021	Spring	4	D	4	4 -5 years	53	>24months	F	10/12/2016	HF	Subclinical	31	pos	pos	pos	pos	neg	16S-Mex-CMh-	DI	5	19.83	26.16	27.54	32.85	0	NE	NE	5020	NE	0	NE	NE	3.7007037171450192	NE	neg	Ext. Kit Qiagen	21/04/2021	18	0-50 d	104	>100 d	122	100-200 d	ancien kit	50 µl	10-2
7097-1	1	2021-04-03	2021	Spring	4	D	4	4 -5 years	44	>24months	F	19/08/2017	HF	Subclinical	31	pos	pos	pos	pos	pos	16S-Mex-CMh-Mass	TI	5	19.5	28.41	29.69	33.37	34.78	NE	NE	871	NE	NE	NE	NE	2.9400181550076634	NE	NE	Ext. Kit Qiagen	21/04/2021	18	0-50 d	104	>100 d	122	100-200 d	ancien kit	50 µl	10-2
7139-1	1	2021-04-03	2021	Spring	4	D	3	3 years	40	>24months	F	18/12/2017	HF	Subclinical	31	pos	pos	neg	pos	neg	16S-CMh-	MI	5	20.27	30.81	0	29.99	0	NE	NE	0	NE	0	NE	NE	neg	NE	neg	Ext. Kit Qiagen	21/04/2021	18	0-50 d	104	>100 d	122	100-200 d	ancien kit	50 µl	10-2
8479-1	1	2021-04-03	2021	Spring	4	D	3	3 years	33	>24months	F	16/07/2018	HF	Subclinical	31	pos	pos	pos	pos	neg	16S-Mex-CMh-	DI	5	20.01	29.27	31.89	29.24	0	NE	NE	145	NE	0	NE	NE	2.1613680022349748	NE	neg	Ext. Kit Qiagen	21/04/2021	18	0-50 d	104	>100 d	122	100-200 d	ancien kit	50 µl	10-2
8743-1	1	2021-04-03	2021	Spring	4	D	3	3 years	33	>24months	F	05/07/2018	HF	Subclinical	31	pos	pos	pos	pos	pos	16S-Mex-CMh-Mass	TI	5	20.14	26.42	31.61	28.11	29.91	NE	NE	182	NE	NE	NE	NE	2.2600713879850747	NE	NE	Ext. Kit Qiagen	21/04/2021	18	0-50 d	104	>100 d	122	100-200 d	ancien kit	50 µl	10-2
8788-1	1	2021-04-03	2021	Spring	4	D	2	2 years	29	>24months	F	03/11/2018	HF	Subclinical	31	pos	pos	pos	pos	pos	16S-Mex-CMh-Mass	TI	5	20.12	27.22	30.57	28.38	32.08	NE	NE	425	NE	NE	NE	NE	2.6283889300503116	NE	NE	Ext. Kit Qiagen	21/04/2021	18	0-50 d	104	>100 d	122	100-200 d	ancien kit	50 µl	10-2
8792-1	1	2021-04-03	2021	Spring	4	D	2	2 years	29	>24months	F	19/11/2018	HF	Subclinical	31	pos	pos	pos	pos	neg	16S-Mex-CMh-	DI	5	20	28.42	31.59	27.68	0	NE	NE	185	NE	0	NE	NE	2.2671717284030137	NE	neg	Ext. Kit Qiagen	21/04/2021	18	0-50 d	104	>100 d	122	100-200 d	ancien kit	50 µl	10-2
7096-1	1	2021-04-03	2021	Spring	4	D	4	4 -5 years	44	>24months	F	18/08/2017	HF	Subclinical	31	pos	neg	neg	neg	neg	NI	NI	5	21.04	0	0	0	0	NE	0	0	0	0	NE	neg	neg	neg	neg	Ext. Kit Qiagen	19/04/2021	16	0-50 d	106	>100 d	122	100-200 d	ancien kit	50 µl	10-2
9769-1	1	2021-04-03	2021	Spring	4	D	1	0 -1 year	6	0-6 months	F	29/09/2020	HF	Subclinical	31	pos	neg	neg	neg	neg	NI	NI	5	19.46	40.76	0	0	0	NE	0	0	0	0	NE	neg	neg	neg	neg	Ext. Kit Qiagen	28/04/2021	25	0-50 d	97	50-100 d	122	100-200 d	ancien kit	50 µl	10-2
9614-1	1	2021-04-03	2021	Spring	4	D	2	2 years	26	>24months	F	30/01/2019	HF	Subclinical	31	pos	pos	pos	pos	neg	16S-Mex-CMh-	DI	5	19.69	29.82	32.4	30.26	0	NE	NE	98.9	NE	0	NE	NE	1.9951962915971795	NE	neg	Ext. Kit Qiagen	26/04/2021	23	0-50 d	99	50-100 d	122	100-200 d	ancien kit	50 µl	10-2
9643-1	1	2021-04-03	2021	Spring	4	D	2	2 years	24	18 months-24 months	F	31/03/2019	HF	Subclinical	31	pos	pos	pos	pos	neg	16S-Mex-CMh-	DI	5	20.17	28.09	29.72	30.42	0	NE	NE	1190	NE	0	NE	NE	3.0755469613925306	NE	neg	Ext. Kit Qiagen	26/04/2021	23	0-50 d	99	50-100 d	122	100-200 d	ancien kit	50 µl	10-2
9663-1	1	2021-04-03	2021	Spring	4	D	2	2 years	22	18 months-24 months	F	02/06/2019	HF	Subclinical	31	pos	pos	pos	pos	neg	16S-Mex-CMh-	DI	5	20.63	28.51	32.41	27.75	0	NE	NE	98.4	NE	0	NE	NE	1.9929950984313416	NE	neg	Ext. Kit Qiagen	26/04/2021	23	0-50 d	99	50-100 d	122	100-200 d	ancien kit	50 µl	10-2
9669-1	1	2021-04-03	2021	Spring	4	D	2	2 years	22	18 months-24 months	F	14/06/2019	HF	Subclinical	31	pos	pos	pos	pos	neg	16S-Mex-CMh-	DI	5	20.07	28.87	32.45	29.39	0	NE	NE	94.8	NE	0	NE	NE	1.9768083373380663	NE	neg	Ext. Kit Qiagen	26/04/2021	23	0-50 d	99	50-100 d	122	100-200 d	ancien kit	50 µl	10-2
9652-1	1	2021-04-03	2021	Spring	4	D	2	2 years	24	18 months-24 months	F	27/04/2019	HF	Subclinical	31	pos	pos	pos	pos	neg	16S-Mex-CMh-	DI	5	20.02	29.43	32.59	28.31	0	NE	NE	82.8	NE	0	NE	NE	1.9180303367848801	NE	neg	Ext. Kit Qiagen	21/04/2021	18	0-50 d	104	>100 d	122	100-200 d	ancien kit	50 µl	10-2
8700-1	1	2021-04-03	2021	Spring	4	D	3	3 years	37	>24months	F	07/03/2018	HF	Subclinical	31	pos	pos	pos	pos	neg	16S-Mex-CMh-	DI	5	21.64	33.36	33.19	29.67	0	21.6	33.4	non-quantifiable	92000	0	1.33445	1.52375	non-quantifiable	4.96379	neg	Ext, Kit Qiagen	19/04/2021	16	0-50 d	1386	>100 d	1402	>200 d	ancien kit	100 µl	10-2
5519-1	1	2020-12-15	2020	Winter	12	D	6	> 5 years	69	>24months	F	30/04/2015	HF	Subclinical	31	pos	pos	pos	neg	neg	16S-Mex-	MI	5	22.26	33.29	35.75	0	0	24800	NE	non-quantifiable	0	0	4.394451680826216	NE	non-quantifiable	neg	neg	Ext. Kit Qiagen	05/01/2021	21	0-50 d	1480	>100 d	1501	>200 d	ancien kit	100 µl	10-2
1138-9	9	2024-01-31	2024	Winter	1	B	5	4 -5 years	66	>24months	F	31/08/2018	Charolaise	Subclinical	42	pos	pos	neg	pos	neg	16S-CMh-	MI	5	18.14	32.25	36.25	30.68	0	NE	320	0	35.5	0	NE	2.50515	neg	1.55023	neg	Ext, Robot IDVET	05/04/2024	65	50-100 d	31	0-50 d	96	0-100 d	MAG FAST768: 034	80 µl	neat
122-9	9	2024-01-31	2024	Winter	1	B	10	> 5 years	121	>24months	F	12/02/2014	crossbred	Subclinical	42	pos	pos	pos	pos	neg	16S-Mex-CMh-	DI	5	19.41	30.54	34.48	26.65	0	NE	800	non-quantifiable	785	0	NE	2.90309	non-quantifiable	2.89487	neg	Ext, Robot IDVET	05/04/2024	65	50-100 d	31	0-50 d	96	0-100 d	MAG FAST768: 034	80 µl	neat
1608-9	9	2024-01-31	2024	Winter	1	B	8	> 5 years	92	>24months	F	15/07/2016	Charolaise	Subclinical	42	pos	pos	pos	neg	neg	16S-Mex-	MI	5	19.33	37.22	34.07	0	0	NE	non-quantifiable	non-quantifiable	0	0	NE	non-quantifiable	non-quantifiable	neg	neg	Ext. Robot IDVET	05/04/2024	65	50-100 d	31	0-50 d	96	0-100 d	MAG FAST768: 034	80 µl	neat
2445-9	9	2024-01-31	2024	Winter	1	B	9	> 5 years	108	>24months	F	15/03/2015	Charolaise	Subclinical	42	pos	pos	pos	neg	neg	16S-Mex-	MI	5	18.92	31.59	30.14	0	0	NE	460	321	0	0	NE	2.66276	2.50651	neg	neg	Ext, Robot IDVET	05/04/2024	65	50-100 d	31	0-50 d	96	0-100 d	MAG FAST768: 034	80 µl	neat
7600-9	9	2024-01-31	2024	Winter	1	B	12	> 5 years	140	>24months	F	30/07/2012	Charolaise	Subclinical	42	pos	pos	neg	neg	neg	16S-	unknown	5	19.27	0	0	37.11	0	NE	NE	0	0	0	NE	NE	neg	neg	neg	Ext. Robot IDVET	05/04/2024	65	50-100 d	31	0-50 d	96	0-100 d	MAG FAST768: 034	80 µl	neat
7678-9	9	2024-01-31	2024	Winter	1	B	3	3 years	41	>24months	F	08/09/2020	Charolaise	Subclinical	42	pos	pos	pos	pos	neg	16S-Mex-CMh-	DI	5	18.92	28.79	29.78	27.94	0	NE	2100	432	292	0	NE	3.32222	2.63548	2.46538	neg	Ext, Robot IDVET	05/04/2024	65	50-100 d	31	0-50 d	96	0-100 d	MAG FAST768: 034	80 µl	neat
8722-9	9	2024-01-31	2024	Winter	1	B	6	> 5 years	72	>24months	F	12/03/2018	Charolaise	Subclinical	42	pos	pos	pos	pos	pos	16S-Mex-CMh-Mass	TI	5	19.17	35.61	34.56	29.63	34.53	NE	non-quantifiable	non-quantifiable	79.6	non-quantifiable	NE	non-quantifiable	non-quantifiable	1.9009130677376691	non-quantifiable	Ext. Robot IDVET	05/04/2024	65	50-100 d	31	0-50 d	96	0-100 d	MAG FAST768: 034	80 µl	neat
8765-9	9	2024-01-31	2024	Winter	1	B	4	4 -5 years	52	>24months	F	11/10/2019	Charolaise	Subclinical	42	pos	pos	pos	pos	neg	16S-Mex-CMh-	DI	5	19.38	29.62	32.21	28.64	0	NE	1300	58.3	170	0	NE	3.11394	1.76567	2.23045	neg	Ext, Robot IDVET	05/04/2024	65	50-100 d	31	0-50 d	96	0-100 d	MAG FAST768: 034	80 µl	neat
9785-9	9	2024-01-31	2024	Winter	1	B	5	4 -5 years	59	>24months	F	14/03/2019	Charolaise	Subclinical	42	pos	neg	pos	pos	pos	Mex-CMh-Mass	unknown	5	18.19	26.2	28.27	26.76	28.18	NE	8600	1500	722	1360	NE	3.9345	3.17609	2.85854	3.13354	Ext, Robot IDVET	05/04/2024	65	50-100 d	31	0-50 d	96	0-100 d	MAG FAST768: 034	80 µl	neat
9831-9	9	2024-01-31	2024	Winter	1	B	7	> 5 years	80	>24months	F	21/07/2017	Charolaise	Subclinical	42	pos	pos	pos	pos	pos	16S-Mex-CMh-Mass	TI	5	18.22	34.72	32.5	32.23	33.15	NE	82	45.9	non-quantifiable	non-quantifiable	NE	1.91381	1.66181	non-quantifiable	non-quantifiable	Ext, Robot IDVET	05/04/2024	65	50-100 d	31	0-50 d	96	0-100 d	MAG FAST768: 034	80 µl	neat
142-9	9	2024-01-31	2024	Winter	1	B	5	4 -5 years	62	>24months	F	09/01/2019	Charolaise	Subclinical	42	pos	pos	pos	pos	pos	16S-Mex-CMh-Mass	TI	5	19.82	34.13	32.66	29.62	32.83	NE	110	346	75.3	68.4	NE	2.04139	2.53908	1.87679	1.83506	Ext, Robot IDVET	09/04/2024	69	50-100 d	27	0-50 d	96	0-100 d	MAG FAST768: 034	80 µl	neat
2454-9	9	2024-01-31	2024	Winter	1	B	9	> 5 years	107	>24months	F	08/04/2015	Charolaise	Subclinical	42	pos	pos	pos	neg	neg	16S-Mex-	MI	5	19.78	34.77	31.97	0	0	NE	80	497	0	0	NE	1.90309	2.69636	neg	neg	Ext, Robot IDVET	09/04/2024	69	50-100 d	27	0-50 d	96	0-100 d	MAG FAST768: 034	80 µl	neat
2521-9	9	2024-01-31	2024	Winter	1	B	2	2 years	30	>24months	F	29/08/2021	Charolaise	Subclinical	42	pos	pos	pos	pos	neg	16S-Mex-CMh-	DI	5	21.61	32.06	29.21	29.72	0	NE	350	2120	69.7	0	NE	2.54407	3.32634	1.84323	neg	Ext, Robot IDVET	09/04/2024	69	50-100 d	27	0-50 d	96	0-100 d	MAG FAST768: 034	80 µl	neat
6233-9	9	2024-01-31	2024	Winter	1	B	11	> 5 years	134	>24months	F	26/01/2013	Charolaise	Subclinical	42	pos	neg	neg	neg	neg	NI	NI	5	17.47	0	0	0	0	NE	0	0	0	0	NE	neg	neg	neg	neg	Ext. Robot IDVET	09/04/2024	69	50-100 d	36	0-50 d	105	100-200 d	MAG FAST768: 034	80 µl	neat
6648-9	9	2024-01-31	2024	Winter	1	B	7	> 5 years	90	>24months	F	11/09/2016	Charolaise	Subclinical	42	pos	pos	pos	pos	neg	16S-Mex-CMh-	DI	5	17.28	34.77	32.31	34.71	0	NE	89.8	415	non-quantifiable	0	NE	1.95328	2.61805	non-quantifiable	neg	Ext, Robot IDVET	09/04/2024	69	50-100 d	36	0-50 d	105	100-200 d	MAG FAST768: 034	80 µl	neat
6929-9	9	2024-01-31	2024	Winter	1	B	8	> 5 years	99	>24months	F	12/12/2015	Charolaise	Subclinical	42	pos	pos	pos	neg	neg	16S-Mex-	MI	5	15.83	34.23	34.82	0	0	NE	78	non-quantifiable	0	0	NE	1.89209	non-quantifiable	neg	neg	Ext, Robot IDVET	09/04/2024	69	50-100 d	36	0-50 d	105	100-200 d	MAG FAST768: 034	80 µl	neat
712-9	9	2024-01-31	2024	Winter	1	B	6	> 5 years	70	>24months	F	30/04/2018	Charolaise	Subclinical	42	pos	pos	pos	neg	pos	16S-Mex-Mass	DI	5	16.99	29.36	31.75	0	32.67	NE	770	558	0	75.9	NE	2.88649	2.74663	neg	1.88024	Ext, Robot IDVET	09/04/2024	69	50-100 d	36	0-50 d	105	100-200 d	MAG FAST768: 034	80 µl	neat
724-9	9	2024-01-31	2024	Winter	1	B	5	4 -5 years	58	>24months	F	14/04/2019	Charolaise	Subclinical	42	pos	pos	pos	pos	neg	16S-Mex-CMh-	DI	5	19.02	28.71	31.48	29.47	30.07	NE	2200	643	84.6	406	NE	3.34242	2.80821	1.92737	2.60853	Ext, Robot IDVET	09/04/2024	69	50-100 d	27	0-50 d	96	0-100 d	MAG FAST768: 034	80 µl	neat
7268-9	9	2024-01-31	2024	Winter	1	B	5	4 -5 years	58	>24months	F	24/04/2019	Charolaise	Subclinical	42	pos	pos	neg	pos	neg	16S-CMh-	MI	5	19.65	35.36	0	27.87	0	NE	non-quantifiable	0	293	0	NE	non-quantifiable	neg	2.4668676203541096	neg	Ext. Robot IDVET	09/04/2024	69	50-100 d	27	0-50 d	96	0-100 d	MAG FAST768: 034	80 µl	neat
7679-9	9	2024-01-31	2024	Winter	1	B	3	3 years	41	>24months	F	09/09/2020	Charolaise	Subclinical	42	pos	pos	pos	pos	neg	16S-Mex-CMh-	DI	5	15.76	28.72	30.28	28.06	0	NE	1000	1210	253	0	NE	3	3.08279	2.40312	neg	Ext, Robot IDVET	09/04/2024	69	50-100 d	36	0-50 d	105	100-200 d	MAG FAST768: 034	80 µl	neat
8218-9	9	2024-01-31	2024	Winter	1	B	11	> 5 years	139	>24months	F	02/09/2012	Charolaise	Subclinical	42	pos	pos	pos	pos	neg	16S-Mex-CMh-	DI	5	19.05	27.78	30.66	29.78	0	NE	3600	989	66.5	0	NE	3.5563	2.9952	1.82282	neg	Ext, Robot IDVET	09/04/2024	69	50-100 d	27	0-50 d	96	0-100 d	MAG FAST768: 034	80 µl	neat
8496-9	9	2024-01-31	2024	Winter	1	B	6	> 5 years	74	>24months	F	27/12/2017	crossbred	Subclinical	42	pos	pos	pos	pos	neg	16S-Mex-CMh-	DI	5	17.24	30.55	29.6	34.3	35.26	NE	1200	1730	non-quantifiable	0	NE	3.07918	3.23805	non-quantifiable	neg	Ext, Robot IDVET	09/04/2024	69	50-100 d	36	0-50 d	105	100-200 d	MAG FAST768: 034	80 µl	neat
8944-9	9	2024-01-31	2024	Winter	1	B	3	3 years	34	>24months	F	06/04/2021	Charolaise	Subclinical	42	pos	pos	neg	pos	pos	16S-CMh-Mass	DI	5	16.72	27.24	0	27.6	31.89	NE	2100	0	362	126	NE	3.32222	neg	2.55871	2.10037	Ext, Robot IDVET	09/04/2024	69	50-100 d	36	0-50 d	105	100-200 d	MAG FAST768: 034	80 µl	neat
41-40	40	2022-10-04	2022	Automn	10	B	13	> 5 years	154	>24months	F	22/02/2010	Limousine	clinical	31	pos	pos	pos	neg	neg	16S-Mex-	MI	5	22.23	36.32	34.81	0	0	22.2	non-quantifiable	non-quantifiable	0	0	1.3463529744506386	non-quantifiable	non-quantifiable	neg	neg	Ext. Kit Qiagen	25/01/2023	113	>100 d	740	>100 d	853	>200 d	kit Nuria 172044925	100 µl	10-2
5791-37	37	2024-02-15	2024	Winter	2	B	4	4 -5 years	43	>24months	F	26/07/2020	Charolaise	Subclinical	42	pos	pos	pos	pos	neg	16S-Mex-CMh-	DI	5	21	31.48	30.28	35.46	0	NE	15000	359	non-quantifiable	0	NE	4.17609	2.55509	non-quantifiable	neg	Ext, Robot IDVET	07/05/2024	82	50-100 d	27	0-50 d	109	100-200 d	MAG FAST768: 034	80 µl	neat
5808-37	37	2024-02-15	2024	Winter	2	B	3	3 years	42	>24months	F	01/09/2020	Charolaise	Subclinical	42	pos	pos	pos	pos	pos	16S-Mex-CMh-Mass	TI	5	20.83	27.86	31.58	31.39	29.33	NE	29000	131	17.3	698	NE	4.4624	2.11727	1.23805	2.84386	Ext, Robot IDVET	07/05/2024	82	50-100 d	27	0-50 d	109	100-200 d	MAG FAST768: 034	80 µl	neat
8461-37	37	2024-02-15	2024	Winter	2	B	15	> 5 years	187	>24months	F	21/10/2008	Charolaise	Subclinical	42	pos	pos	neg	neg	neg	16S-	unknown	5	20.34	35.26	0	0	0	NE	non-quantifiable	0	0	0	NE	non-quantifiable	neg	neg	neg	Ext. Robot IDVET	07/05/2024	82	50-100 d	27	0-50 d	109	100-200 d	MAG FAST768: 034	80 µl	neat
6859-41	41	2024-12-13	2024	Winter	12	B	2	2 years	20	18 months-24 months	F	17/04/2023	Blonde d'Aquitaine	Subclinical	12	pos	pos	neg	pos	neg	16S-CMh-	MI	5	21.28	32.08	0	30.71	0	NE	168	0	96000	0	NE	2.22531	neg	4.98227	neg	Ext, Kit Qiagen	20/01/2025	38	0-50 d	1	0-50 d	38	0-100 d	?	100 µl	10-2
1153-5	5	2023-09-19	2023	Automn	9	D	5	4 -5 years	65	>24months	F	06/05/2018	Montbéliarde	Subclinical	7	pos	pos	neg	neg	pos	16S-Mass	MI	5	18.45	31.04	0	0	29.93	NE	NE	0	0	NE	NE	NE	neg	neg	NE	Ext. Robot IDVET	29/09/2023	10	0-50 d	4	0-50 d	14	0-100 d	MAG FAST768: 034	80 µl	neat
1169-5	5	2023-09-19	2023	Automn	9	D	5	4 -5 years	61	>24months	F	13/09/2018	Montbéliarde	Subclinical	7	pos	pos	neg	pos	pos	16S-CMh-Mass	DI	5	18.71	31.4	0	26.56	36.29	NE	NE	0	NE	NE	NE	NE	neg	NE	NE	Ext. Robot IDVET	29/09/2023	10	0-50 d	4	0-50 d	14	0-100 d	MAG FAST768: 034	80 µl	neat
1175-5	5	2023-09-19	2023	Automn	9	D	5	4 -5 years	60	>24months	F	03/10/2018	Montbéliarde	Subclinical	7	pos	pos	neg	neg	pos	16S-Mass	MI	5	17.49	35.65	0	0	34.72	NE	NE	0	0	NE	NE	NE	neg	neg	NE	Ext. Robot IDVET	29/09/2023	10	0-50 d	4	0-50 d	14	0-100 d	MAG FAST768: 034	80 µl	neat
1176-5	5	2023-09-19	2023	Automn	9	D	5	4 -5 years	60	>24months	F	10/10/2018	Montbéliarde	Subclinical	7	pos	pos	pos	neg	neg	16S-Mex-	MI	5	19.59	32.5	30.49	0	0	NE	NE	NE	0	0	NE	NE	NE	neg	neg	Ext. Robot IDVET	29/09/2023	10	0-50 d	4	0-50 d	14	0-100 d	MAG FAST768: 034	80 µl	neat
1180-5	5	2023-09-19	2023	Automn	9	D	5	4 -5 years	60	>24months	F	29/10/2018	Montbéliarde	Subclinical	7	pos	pos	pos	pos	neg	16S-Mex-CMh-	DI	5	19.55	31.17	20.09	26.76	0	NE	NE	NE	NE	0	NE	NE	NE	NE	neg	Ext. Robot IDVET	29/09/2023	10	0-50 d	4	0-50 d	14	0-100 d	MAG FAST768: 034	80 µl	neat
1378-5	5	2023-09-19	2023	Automn	9	D	2	2 years	19	18 months-24 months	F	17/02/2022	Montbéliarde	Subclinical	7	pos	pos	pos	pos	neg	16S-Mex-CMh-	DI	5	16.34	22.66	21.73	22.69	0	NE	NE	NE	NE	0	NE	NE	NE	NE	neg	Ext. Robot IDVET	29/09/2023	10	0-50 d	4	0-50 d	14	0-100 d	MAG FAST768: 034	80 µl	neat
1379-5	5	2023-09-19	2023	Automn	9	D	1	0 -1 year	11	6-12 months	F	18/10/2022	Montbéliarde	Subclinical	7	pos	pos	neg	pos	neg	16S-CMh-	MI	5	17.86	31.74	0	29.87	0	NE	NE	0	NE	0	NE	NE	neg	NE	neg	Ext. Robot IDVET	29/09/2023	10	0-50 d	4	0-50 d	14	0-100 d	MAG FAST768: 034	80 µl	neat
1386-5	5	2023-09-19	2023	Automn	9	D	1	0 -1 year	11	6-12 months	F	31/10/2022	Montbéliarde	Subclinical	7	pos	pos	neg	pos	neg	16S-CMh-	MI	5	17.23	34.28	0	29.62	0	NE	NE	0	NE	0	NE	NE	neg	NE	neg	Ext. Robot IDVET	29/09/2023	10	0-50 d	4	0-50 d	14	0-100 d	MAG FAST768: 034	80 µl	neat
1388-5	5	2023-09-19	2023	Automn	9	D	1	0 -1 year	11	6-12 months	F	01/11/2022	crossbred	Subclinical	7	pos	pos	pos	pos	neg	16S-Mex-CMh-	DI	5	18.78	25.58	24.61	28.11	0	NE	NE	NE	NE	0	NE	NE	NE	NE	neg	Ext. Robot IDVET	29/09/2023	10	0-50 d	4	0-50 d	14	0-100 d	MAG FAST768: 034	80 µl	neat
1391-5	5	2023-09-19	2023	Automn	9	D	1	0 -1 year	10	6-12 months	F	11/11/2022	Montbéliarde	Subclinical	7	pos	pos	neg	pos	neg	16S-CMh-	MI	5	17.05	30.13	0	26.11	0	NE	NE	0	NE	0	NE	NE	neg	NE	neg	Ext. Robot IDVET	29/09/2023	10	0-50 d	4	0-50 d	14	0-100 d	MAG FAST768: 034	80 µl	neat
1392-5	5	2023-09-19	2023	Automn	9	D	1	0 -1 year	10	6-12 months	F	15/11/2022	crossbred	Subclinical	7	pos	pos	pos	pos	neg	16S-Mex-CMh-	DI	5	17.4	28.14	27.08	26.36	0	NE	NE	NE	NE	0	NE	NE	NE	NE	neg	Ext. Robot IDVET	29/09/2023	10	0-50 d	4	0-50 d	14	0-100 d	MAG FAST768: 034	80 µl	neat
1393-5	5	2023-09-19	2023	Automn	9	D	1	0 -1 year	10	6-12 months	F	15/11/2022	crossbred	Subclinical	7	pos	pos	neg	pos	neg	16S-CMh-	MI	5	16.99	29.2	0	25.32	0	NE	NE	0	NE	0	NE	NE	neg	NE	neg	Ext. Robot IDVET	29/09/2023	10	0-50 d	4	0-50 d	14	0-100 d	MAG FAST768: 034	80 µl	neat
1402-5	5	2023-09-19	2023	Automn	9	D	1	0 -1 year	6	0-6 months	F	09/03/2023	Montbéliarde	Subclinical	7	pos	neg	neg	neg	neg	NI	NI	5	16.72	0	0	0	0	NE	0	0	0	0	NE	neg	neg	neg	neg	Ext. Robot IDVET	29/09/2023	10	0-50 d	4	0-50 d	14	0-100 d	MAG FAST768: 034	80 µl	neat
1411-5	5	2023-09-19	2023	Automn	9	D	0	0 -1 year	4	0-6 months	F	01/06/2023	Montbéliarde	Subclinical	7	pos	neg	neg	neg	neg	NI	NI	5	16.7	0	0	0	0	NE	0	0	0	0	NE	neg	neg	neg	neg	Ext. Robot IDVET	29/09/2023	10	0-50 d	4	0-50 d	14	0-100 d	MAG FAST768: 034	80 µl	neat
1412-5	5	2023-09-19	2023	Automn	9	D	0	0 -1 year	3	0-6 months	F	07/06/2023	Montbéliarde	Subclinical	7	pos	neg	neg	neg	neg	NI	NI	5	16.89	0	0	0	0	NE	0	0	0	0	NE	neg	neg	neg	neg	Ext. Robot IDVET	29/09/2023	10	0-50 d	4	0-50 d	14	0-100 d	MAG FAST768: 034	80 µl	neat
1413-5	5	2023-09-19	2023	Automn	9	D	0	0 -1 year	3	0-6 months	F	16/06/2023	Montbéliarde	Subclinical	7	pos	neg	neg	neg	neg	NI	NI	5	16.55	0	0	0	0	NE	0	0	0	0	NE	neg	neg	neg	neg	Ext. Robot IDVET	29/09/2023	10	0-50 d	4	0-50 d	14	0-100 d	MAG FAST768: 034	80 µl	neat
1414-5	5	2023-09-19	2023	Automn	9	D	0	0 -1 year	2	0-6 months	F	29/07/2023	Montbéliarde	Subclinical	7	pos	neg	neg	neg	neg	NI	NI	5	17.41	39.55	0	0	0	NE	0	0	0	0	NE	neg	neg	neg	neg	Ext. Robot IDVET	29/09/2023	10	0-50 d	4	0-50 d	14	0-100 d	MAG FAST768: 034	80 µl	neat
1415-5	5	2023-09-19	2023	Automn	9	D	0	0 -1 year	1	0-6 months	F	24/08/2023	Montbéliarde	Subclinical	7	pos	neg	neg	neg	neg	NI	NI	5	17.07	0	0	0	0	NE	0	0	0	0	NE	neg	neg	neg	neg	Ext. Robot IDVET	29/09/2023	10	0-50 d	4	0-50 d	14	0-100 d	MAG FAST768: 034	80 µl	neat
1417-5	5	2023-09-19	2023	Automn	9	D	0	0 -1 year	0	0-6 months	F	11/09/2023	Montbéliarde	Subclinical	7	pos	neg	neg	neg	neg	NI	NI	5	16.88	0	0	0	0	NE	0	0	0	0	NE	neg	neg	neg	neg	Ext. Robot IDVET	29/09/2023	10	0-50 d	4	0-50 d	14	0-100 d	MAG FAST768: 034	80 µl	neat
1418-5	5	2023-09-19	2023	Automn	9	D	0	0 -1 year	0	0-6 months	F	14/09/2023	crossbred	Subclinical	7	pos	neg	neg	neg	neg	NI	NI	5	16.49	0	0	0	0	NE	0	0	0	0	NE	neg	neg	neg	neg	Ext. Robot IDVET	29/09/2023	10	0-50 d	4	0-50 d	14	0-100 d	MAG FAST768: 034	80 µl	neat
2081-5	5	2023-09-19	2023	Automn	9	D	11	> 5 years	137	>24months	F	27/06/2012	Montbéliarde	Subclinical	7	pos	neg	neg	neg	neg	NI	NI	5	20.36	0	0	0	0	NE	0	0	0	0	NE	neg	neg	neg	neg	Ext. Robot IDVET	29/09/2023	10	0-50 d	4	0-50 d	14	0-100 d	MAG FAST768: 034	80 µl	neat
2089-5	5	2023-09-19	2023	Automn	9	D	4	4 -5 years	46	>24months	F	09/12/2019	Montbéliarde	Subclinical	7	pos	pos	pos	pos	pos	16S-Mex-CMh-Mass	TI	5	17.99	29.8	29.18	32.28	31.83	NE	NE	NE	NE	NE	NE	NE	NE	NE	NE	Ext. Robot IDVET	29/09/2023	10	0-50 d	4	0-50 d	14	0-100 d	MAG FAST768: 034	80 µl	neat
2091-5	5	2023-09-19	2023	Automn	9	D	4	4 -5 years	44	>24months	F	27/01/2020	Montbéliarde	Subclinical	7	pos	pos	pos	pos	pos	16S-Mex-CMh-Mass	TI	5	19.22	31.47	30.07	30.67	37.31	NE	NE	NE	NE	NE	NE	NE	NE	NE	NE	Ext. Robot IDVET	29/09/2023	10	0-50 d	4	0-50 d	14	0-100 d	MAG FAST768: 034	80 µl	neat
2096-5	5	2023-09-19	2023	Automn	9	D	4	4 -5 years	44	>24months	F	16/02/2020	Montbéliarde	Subclinical	7	pos	pos	neg	pos	neg	16S-CMh-	MI	5	19.2	33.41	0	29.76	0	NE	NE	0	NE	0	NE	NE	neg	NE	neg	Ext. Robot IDVET	29/09/2023	10	0-50 d	4	0-50 d	14	0-100 d	MAG FAST768: 034	80 µl	neat
2104-5	5	2023-09-19	2023	Automn	9	D	3	3 years	42	>24months	F	13/04/2020	Montbéliarde	Subclinical	7	pos	pos	pos	pos	neg	16S-Mex-CMh-	DI	5	18.48	31.34	31.06	29.21	0	NE	NE	NE	NE	0	NE	NE	NE	NE	neg	Ext. Robot IDVET	29/09/2023	10	0-50 d	4	0-50 d	14	0-100 d	MAG FAST768: 034	80 µl	neat
2117-5	5	2023-09-19	2023	Automn	9	D	3	3 years	39	>24months	F	13/07/2020	Montbéliarde	Subclinical	7	pos	pos	neg	pos	neg	16S-CMh-	MI	5	20.5	34.52	0	29.28	0	NE	NE	0	NE	0	NE	NE	neg	NE	neg	Ext. Robot IDVET	29/09/2023	10	0-50 d	4	0-50 d	14	0-100 d	MAG FAST768: 034	80 µl	neat
2380-5	5	2023-09-19	2023	Automn	9	D	7	> 5 years	82	>24months	F	15/12/2016	Montbéliarde	Subclinical	7	pos	pos	neg	pos	neg	16S-CMh-	MI	5	18.02	36.74	0	30.93	0	NE	NE	0	NE	0	NE	NE	neg	NE	neg	Ext. Robot IDVET	29/09/2023	10	0-50 d	4	0-50 d	14	0-100 d	MAG FAST768: 034	80 µl	neat
2408-5	5	2023-09-19	2023	Automn	9	D	6	> 5 years	74	>24months	F	27/08/2017	Montbéliarde	Subclinical	7	pos	pos	pos	neg	neg	16S-Mex-	MI	5	17.69	33.63	31.31	0	0	NE	NE	NE	0	0	NE	NE	NE	neg	neg	Ext. Robot IDVET	29/09/2023	10	0-50 d	4	0-50 d	14	0-100 d	MAG FAST768: 034	80 µl	neat
2416-5	5	2023-09-19	2023	Automn	9	D	6	> 5 years	72	>24months	F	18/10/2017	Montbéliarde	Subclinical	7	pos	pos	neg	pos	pos	16S-CMh-Mass	DI	5	19.45	33.18	0	31.53	32.46	NE	NE	0	NE	NE	NE	NE	neg	NE	NE	Ext. Robot IDVET	29/09/2023	10	0-50 d	4	0-50 d	14	0-100 d	MAG FAST768: 034	80 µl	neat
2894-5	5	2023-09-19	2023	Automn	9	D	13	> 5 years	159	>24months	F	07/09/2010	Montbéliarde	Subclinical	7	pos	neg	neg	neg	neg	NI	NI	5	19.44	0	0	0	0	NE	0	0	0	0	NE	neg	neg	neg	neg	Ext. Robot IDVET	29/09/2023	10	0-50 d	4	0-50 d	14	0-100 d	MAG FAST768: 034	80 µl	neat
2938-5	5	2023-09-19	2023	Automn	9	D	3	3 years	35	>24months	F	25/10/2020	Montbéliarde	Subclinical	7	pos	pos	pos	pos	pos	16S-Mex-CMh-Mass	TI	5	18.65	29.14	28.12	28.99	32.97	NE	NE	NE	NE	NE	NE	NE	NE	NE	NE	Ext. Robot IDVET	29/09/2023	10	0-50 d	4	0-50 d	14	0-100 d	MAG FAST768: 034	80 µl	neat
2953-5	5	2023-09-19	2023	Automn	9	D	3	3 years	32	>24months	F	05/02/2021	Montbéliarde	Subclinical	7	pos	pos	pos	pos	neg	16S-Mex-CMh-	DI	5	17.89	31.51	29.95	29.98	0	NE	NE	NE	NE	0	NE	NE	NE	NE	neg	Ext. Robot IDVET	29/09/2023	10	0-50 d	4	0-50 d	14	0-100 d	MAG FAST768: 034	80 µl	neat
399-5	5	2023-09-19	2023	Automn	9	D	9	> 5 years	110	>24months	F	27/08/2014	Montbéliarde	Subclinical	7	pos	pos	pos	neg	neg	16S-Mex-	MI	5	19.45	33.84	27.15	0	0	NE	NE	NE	0	0	NE	NE	NE	neg	neg	Ext. Robot IDVET	29/09/2023	10	0-50 d	4	0-50 d	14	0-100 d	MAG FAST768: 034	80 µl	neat
431-5	5	2023-09-19	2023	Automn	9	D	8	> 5 years	101	>24months	F	24/05/2015	Montbéliarde	Subclinical	7	pos	pos	pos	neg	neg	16S-Mex-	MI	5	19.35	33.64	31.81	0	0	NE	NE	NE	0	0	NE	NE	NE	neg	neg	Ext. Robot IDVET	29/09/2023	10	0-50 d	4	0-50 d	14	0-100 d	MAG FAST768: 034	80 µl	neat
4463-5	5	2023-09-19	2023	Automn	9	D	8	> 5 years	99	>24months	F	17/08/2015	Montbéliarde	Subclinical	7	pos	pos	neg	neg	neg	16S-	unknown	5	19.38	36.88	0	36.09	0	NE	NE	0	0	0	NE	NE	neg	neg	neg	Ext. Robot IDVET	29/09/2023	10	0-50 d	4	0-50 d	14	0-100 d	MAG FAST768: 034	80 µl	neat
5415-5	5	2023-09-19	2023	Automn	9	D	8	> 5 years	95	>24months	F	16/11/2015	Montbéliarde	Subclinical	7	pos	pos	pos	pos	pos	16S-Mex-CMh-Mass	TI	5	17.91	28.93	27.92	27.38	33.4	NE	NE	NE	NE	NE	NE	NE	NE	NE	NE	Ext. Robot IDVET	29/09/2023	10	0-50 d	4	0-50 d	14	0-100 d	MAG FAST768: 034	80 µl	neat
5416-5	5	2023-09-19	2023	Automn	9	D	8	> 5 years	95	>24months	F	20/11/2015	Montbéliarde	Subclinical	7	pos	pos	neg	neg	pos	16S-Mass	MI	5	18.32	32.75	0	0	32.27	NE	NE	0	0	NE	NE	NE	neg	neg	NE	Ext. Robot IDVET	29/09/2023	10	0-50 d	4	0-50 d	14	0-100 d	MAG FAST768: 034	80 µl	neat
5449-5	5	2023-09-19	2023	Automn	9	D	7	> 5 years	85	>24months	F	17/09/2016	Montbéliarde	Subclinical	7	pos	pos	neg	pos	pos	16S-CMh-Mass	DI	5	18.32	33.33	0	29.58	36.98	NE	NE	0	NE	NE	NE	NE	neg	NE	NE	Ext. Robot IDVET	29/09/2023	10	0-50 d	4	0-50 d	14	0-100 d	MAG FAST768: 034	80 µl	neat
5645-5	5	2023-09-19	2023	Automn	9	D	5	4 -5 years	59	>24months	F	23/11/2018	Montbéliarde	Subclinical	7	pos	pos	pos	pos	neg	16S-Mex-CMh-	DI	5	18.37	28.24	27.56	31.19	0	NE	NE	NE	NE	0	NE	NE	NE	NE	neg	Ext. Robot IDVET	29/09/2023	10	0-50 d	4	0-50 d	14	0-100 d	MAG FAST768: 034	80 µl	neat
5646-5	5	2023-09-19	2023	Automn	9	D	5	4 -5 years	58	>24months	F	06/12/2018	Montbéliarde	Subclinical	7	pos	pos	pos	pos	neg	16S-Mex-CMh-	DI	5	18.42	28.91	30.15	26.13	0	NE	NE	NE	NE	0	NE	NE	NE	NE	neg	Ext. Robot IDVET	29/09/2023	10	0-50 d	4	0-50 d	14	0-100 d	MAG FAST768: 034	80 µl	neat
5650-5	5	2023-09-19	2023	Automn	9	D	5	4 -5 years	57	>24months	F	06/01/2019	Montbéliarde	Subclinical	7	pos	pos	pos	pos	neg	16S-Mex-CMh-	DI	5	18.89	28.47	30.3	28.93	0	NE	NE	NE	NE	0	NE	NE	NE	NE	neg	Ext. Robot IDVET	29/09/2023	10	0-50 d	4	0-50 d	14	0-100 d	MAG FAST768: 034	80 µl	neat
5665-5	5	2023-09-19	2023	Automn	9	D	4	4 -5 years	51	>24months	F	23/07/2019	Montbéliarde	Subclinical	7	pos	neg	neg	neg	neg	NI	NI	5	18.89	0	0	0	0	NE	0	0	0	0	NE	neg	neg	neg	neg	Ext. Robot IDVET	29/09/2023	10	0-50 d	4	0-50 d	14	0-100 d	MAG FAST768: 034	80 µl	neat
5670-5	5	2023-09-19	2023	Automn	9	D	4	4 -5 years	49	>24months	F	09/09/2019	Montbéliarde	Subclinical	7	pos	pos	neg	neg	pos	16S-Mass	MI	5	17.36	30.2	0	0	29.41	NE	NE	0	0	NE	NE	NE	neg	neg	NE	Ext. Robot IDVET	29/09/2023	10	0-50 d	4	0-50 d	14	0-100 d	MAG FAST768: 034	80 µl	neat
5671-5	5	2023-09-19	2023	Automn	9	D	4	4 -5 years	49	>24months	F	13/09/2019	Montbéliarde	Subclinical	7	pos	pos	neg	neg	neg	16S-	unknown	5	18.15	37.52	0	0	0	NE	NE	0	0	0	NE	NE	neg	neg	neg	Ext. Robot IDVET	29/09/2023	10	0-50 d	4	0-50 d	14	0-100 d	MAG FAST768: 034	80 µl	neat
5679-5	5	2023-09-19	2023	Automn	9	D	4	4 -5 years	48	>24months	F	05/10/2019	Montbéliarde	Subclinical	7	pos	pos	pos	pos	neg	16S-Mex-CMh-	DI	5	18.09	28.32	27.52	28.09	0	NE	NE	NE	NE	0	NE	NE	NE	NE	neg	Ext. Robot IDVET	29/09/2023	10	0-50 d	4	0-50 d	14	0-100 d	MAG FAST768: 034	80 µl	neat
6227-5	5	2023-09-19	2023	Automn	9	D	10	> 5 years	124	>24months	F	02/07/2013	Montbéliarde	Subclinical	7	pos	pos	neg	pos	neg	16S-CMh-	MI	5	18.61	33.68	0	29.23	0	NE	NE	0	NE	0	NE	NE	neg	NE	neg	Ext. Robot IDVET	29/09/2023	10	0-50 d	4	0-50 d	14	0-100 d	MAG FAST768: 034	80 µl	neat
7113-5	5	2023-09-19	2023	Automn	9	D	2	2 years	23	18 months-24 months	F	19/10/2021	Montbéliarde	Subclinical	7	pos	pos	pos	pos	neg	16S-Mex-CMh-	DI	5	16.77	30.39	28.85	31.35	0	NE	NE	NE	NE	0	NE	NE	NE	NE	neg	Ext. Robot IDVET	29/09/2023	10	0-50 d	4	0-50 d	14	0-100 d	MAG FAST768: 034	80 µl	neat
7121-5	5	2023-09-19	2023	Automn	9	D	2	2 years	22	18 months-24 months	F	29/11/2021	Montbéliarde	Subclinical	7	pos	pos	pos	pos	pos	16S-Mex-CMh-Mass	TI	5	17.93	24.91	24.08	28.11	31.37	NE	NE	NE	NE	NE	NE	NE	NE	NE	NE	Ext. Robot IDVET	29/09/2023	10	0-50 d	4	0-50 d	14	0-100 d	MAG FAST768: 034	80 µl	neat
7128-5	5	2023-09-19	2023	Automn	9	D	2	2 years	20	18 months-24 months	F	03/02/2022	Montbéliarde	Subclinical	7	pos	pos	pos	neg	pos	16S-Mex-Mass	DI	5	18.24	26.37	27.07	0	28.48	NE	NE	NE	0	NE	NE	NE	NE	neg	NE	Ext. Robot IDVET	29/09/2023	10	0-50 d	4	0-50 d	14	0-100 d	MAG FAST768: 034	80 µl	neat
7130-5	5	2023-09-19	2023	Automn	9	D	2	2 years	20	18 months-24 months	F	09/02/2022	Montbéliarde	Subclinical	7	pos	pos	neg	pos	pos	16S-CMh-Mass	DI	5	17.32	29.43	0	27.23	31.44	NE	NE	0	NE	NE	NE	NE	neg	NE	NE	Ext. Robot IDVET	29/09/2023	10	0-50 d	4	0-50 d	14	0-100 d	MAG FAST768: 034	80 µl	neat
7131-5	5	2023-09-19	2023	Automn	9	D	2	2 years	19	18 months-24 months	F	08/03/2022	Montbéliarde	Subclinical	7	pos	pos	pos	pos	neg	16S-Mex-CMh-	DI	5	18.6	27.57	26.99	30.05	0	NE	NE	NE	NE	0	NE	NE	NE	NE	neg	Ext. Robot IDVET	29/09/2023	10	0-50 d	4	0-50 d	14	0-100 d	MAG FAST768: 034	80 µl	neat
7133-5	5	2023-09-19	2023	Automn	9	D	1	0 -1 year	17	12-18 months	F	21/04/2022	Montbéliarde	Subclinical	7	pos	pos	pos	pos	pos	16S-Mex-CMh-Mass	TI	5	16.86	27.27	29.15	27.47	28.36	NE	NE	NE	NE	NE	NE	NE	NE	NE	NE	Ext. Robot IDVET	29/09/2023	10	0-50 d	4	0-50 d	14	0-100 d	MAG FAST768: 034	80 µl	neat
7135-5	5	2023-09-19	2023	Automn	9	D	1	0 -1 year	17	12-18 months	F	28/04/2022	Montbéliarde	Subclinical	7	pos	pos	pos	pos	neg	16S-Mex-CMh-	DI	5	17.91	32.46	31.11	32.81	0	NE	NE	NE	NE	0	NE	NE	NE	NE	neg	Ext. Robot IDVET	29/09/2023	10	0-50 d	4	0-50 d	14	0-100 d	MAG FAST768: 034	80 µl	neat
7149-5	5	2023-09-19	2023	Automn	9	D	2	2 years	19	18 months-24 months	F	19/02/2022	Montbéliarde	Subclinical	7	pos	pos	pos	pos	neg	16S-Mex-CMh-	DI	5	17.5	28.65	27.99	27.7	0	NE	NE	NE	NE	0	NE	NE	NE	NE	neg	Ext. Robot IDVET	29/09/2023	10	0-50 d	4	0-50 d	14	0-100 d	MAG FAST768: 034	80 µl	neat
9511-5	5	2023-09-19	2023	Automn	9	D	10	> 5 years	121	>24months	F	28/09/2013	Montbéliarde	Subclinical	7	pos	pos	pos	neg	neg	16S-Mex-	MI	5	19.4	33.15	31.68	0	0	NE	NE	NE	0	0	NE	NE	NE	neg	neg	Ext. Robot IDVET	29/09/2023	10	0-50 d	4	0-50 d	14	0-100 d	MAG FAST768: 034	80 µl	neat
9533-5	5	2023-09-19	2023	Automn	9	D	9	> 5 years	114	>24months	F	16/05/2014	Montbéliarde	Subclinical	7	pos	pos	neg	pos	neg	16S-CMh-	MI	5	18.59	31.31	0	27.35	0	NE	NE	0	NE	0	NE	NE	neg	NE	neg	Ext. Robot IDVET	29/09/2023	10	0-50 d	4	0-50 d	14	0-100 d	MAG FAST768: 034	80 µl	neat
3010-32	32	2024-12-12	2024	Winter	12	B	11	> 5 years	137	>24months	F	29/08/2013	Limousine	Subclinical	15	pos	pos	neg	neg	neg	16S-	unknown	5	21.36	37.4	0	0	37.3	NE	non-quantifiable	0	0	0	NE	non-quantifiable	neg	neg	neg	Ext. Robot IDVET	14/03/2025	92	50-100 d	3	0-50 d	95	0-100 d	MAG FAST768: 034	80 µl	neat
3072-32	32	2024-12-12	2024	Winter	12	B	8	> 5 years	94	>24months	F	06/04/2017	Limousine	Subclinical	15	pos	pos	pos	neg	neg	16S-Mex-	MI	5	19.1	37.18	33.88	36.41	0	NE	non-quantifiable	non-quantifiable	0	0	NE	non-quantifiable	non-quantifiable	neg	neg	Ext. Robot IDVET	14/03/2025	92	50-100 d	3	0-50 d	95	0-100 d	MAG FAST768: 034	80 µl	neat
3476-32	32	2024-12-12	2024	Winter	12	B	10	> 5 years	125	>24months	F	12/09/2014	Limousine	Subclinical	15	pos	neg	neg	neg	neg	NI	NI	5	21.54	0	0	0	0	NE	0	0	0	0	NE	neg	neg	neg	neg	Ext. Robot IDVET	14/03/2025	92	50-100 d	3	0-50 d	95	0-100 d	MAG FAST768: 034	80 µl	neat
4216-32	32	2024-12-12	2024	Winter	12	B	9	> 5 years	112	>24months	F	22/09/2015	Limousine	Subclinical	15	pos	pos	pos	neg	neg	16S-Mex-	MI	5	19.83	30.78	29.46	36.34	0	NE	736	2170	0	0	NE	2.86688	3.33646	neg	neg	Ext, Robot IDVET	14/03/2025	92	50-100 d	3	0-50 d	95	0-100 d	MAG FAST768: 034	80 µl	neat
5237-32	32	2024-12-12	2024	Winter	12	B	8	> 5 years	93	>24months	F	12/04/2017	Limousine	Subclinical	15	pos	pos	neg	pos	neg	16S-CMh-	MI	5	20.81	33.51	0	31.58	0	NE	150	0	56.9	0	NE	2.17609	neg	1.75511	neg	Ext, Robot IDVET	14/03/2025	92	50-100 d	3	0-50 d	95	0-100 d	MAG FAST768: 034	80 µl	neat
6559-32	32	2024-12-12	2024	Winter	12	B	8	> 5 years	100	>24months	F	15/09/2016	Limousine	Subclinical	15	pos	neg	neg	neg	neg	NI	NI	5	20.85	0	0	0	0	NE	0	0	0	0	NE	neg	neg	neg	neg	Ext. Robot IDVET	14/03/2025	92	50-100 d	3	0-50 d	95	0-100 d	MAG FAST768: 034	80 µl	neat
8588-32	32	2024-12-12	2024	Winter	12	B	6	> 5 years	76	>24months	F	10/09/2018	Limousine	Subclinical	15	pos	pos	neg	pos	neg	16S-CMh-	MI	5	19.4	32.31	0	28.25	37.12	NE	301	0	218	0	NE	2.47857	neg	2.33846	neg	Ext, Robot IDVET	14/03/2025	92	50-100 d	3	0-50 d	95	0-100 d	MAG FAST768: 034	80 µl	neat
9125-32	32	2024-12-12	2024	Winter	12	B	14	> 5 years	174	>24months	F	06/09/2010	Limousine	Subclinical	15	pos	pos	neg	neg	neg	16S-	unknown	5	20.52	37.4	0	36.38	0	NE	non-quantifiable	0	0	0	NE	non-quantifiable	neg	neg	neg	Ext. Robot IDVET	14/03/2025	92	50-100 d	3	0-50 d	95	0-100 d	MAG FAST768: 034	80 µl	neat
9412-32	32	2024-12-12	2024	Winter	12	B	5	4 -5 years	64	>24months	F	21/09/2019	Limousine	Subclinical	15	pos	pos	pos	pos	neg	16S-Mex-CMh-	DI	5	20.56	30.25	34.06	27.55	37.07	NE	1000	non-quantifiable	288	non-quantifiable	NE	3	non-quantifiable	2.45939	non-quantifiable	Ext, Robot IDVET	14/03/2025	92	50-100 d	3	0-50 d	95	0-100 d	MAG FAST768: 034	80 µl	neat
9453-32	32	2024-12-12	2024	Winter	12	B	5	4 -5 years	63	>24months	F	17/10/2019	Limousine	Subclinical	15	pos	pos	neg	neg	neg	16S-	unknown	5	21	36.95	0	0	0	NE	non-quantifiable	0	0	0	NE	non-quantifiable	neg	neg	neg	Ext. Robot IDVET	14/03/2025	92	50-100 d	3	0-50 d	95	0-100 d	MAG FAST768: 034	80 µl	neat
1160-33	33	2024-02-02	2024	Winter	2	B	13	> 5 years	159	>24months	F	10/01/2011	Charolaise	Subclinical	42	pos	pos	pos	pos	neg	16S-Mex-CMh-	DI	5	17.74	28.73	32.79	34.03	0	NE	1000	323	non-quantifiable	0	NE	3	2.5092	non-quantifiable	neg	Ext, Robot IDVET	09/04/2024	67	50-100 d	36	0-50 d	103	100-200 d	MAG FAST768: 034	80 µl	neat
2687-33	33	2024-02-02	2024	Winter	2	B	12	> 5 years	146	>24months	F	19/02/2012	Charolaise	Subclinical	42	pos	pos	pos	pos	neg	16S-Mex-CMh-	DI	5	18.36	27.36	31.24	34.37	0	NE	2000	729	non-quantifiable	0	NE	3.30103	2.86273	non-quantifiable	neg	Ext, Robot IDVET	09/04/2024	67	50-100 d	36	0-50 d	103	100-200 d	MAG FAST768: 034	80 µl	neat
2730-33	33	2024-02-02	2024	Winter	2	B	3	3 years	40	>24months	F	14/10/2020	Charolaise	Subclinical	42	pos	pos	neg	pos	neg	16S-CMh-	MI	5	16.69	24.91	0	25.5	0	NE	6200	0	1850	0	NE	3.79239	neg	3.26717	neg	Ext, Robot IDVET	09/04/2024	67	50-100 d	36	0-50 d	103	100-200 d	MAG FAST768: 034	80 µl	neat
2858-33	33	2024-02-02	2024	Winter	2	B	7	> 5 years	86	>24months	F	14/01/2017	Charolaise	Subclinical	42	pos	pos	neg	neg	neg	16S-	unknown	5	16.43	36.45	0	0	0	NE	non-quantifiable	0	0	0	NE	non-quantifiable	neg	neg	neg	Ext. Robot IDVET	09/04/2024	67	50-100 d	36	0-50 d	103	100-200 d	MAG FAST768: 034	80 µl	neat
3986-33	33	2024-02-02	2024	Winter	2	B	3	3 years	37	>24months	F	26/01/2021	crossbred	Subclinical	42	pos	pos	pos	pos	neg	16S-Mex-CMh-	DI	5	16.74	26.64	32.98	25.91	0	NE	2700	292	1340	0	NE	3.43136	2.46538	3.1271	neg	Ext, Robot IDVET	09/04/2024	67	50-100 d	36	0-50 d	103	100-200 d	MAG FAST768: 034	80 µl	neat
6478-33	33	2024-02-02	2024	Winter	2	B	13	> 5 years	154	>24months	F	11/06/2011	crossbred	Subclinical	42	pos	pos	neg	pos	neg	16S-CMh-	MI	5	16.88	32.61	0	32.73	37.71	NE	170	0	non-quantifiable	0	NE	2.23045	neg	non-quantifiable	neg	Ext, Robot IDVET	09/04/2024	67	50-100 d	36	0-50 d	103	100-200 d	MAG FAST768: 034	80 µl	neat
203-31	31	2024-11-26	2024	Automn	11	B	15	> 5 years	181	>24months	F	01/01/2010	Blonde d'Aquitaine	Subclinical	31	pos	pos	pos	pos	neg	16S-Mex-CMh-	DI	5	22.9	30.22	27.34	27.34	35.26	NE	3050	4980000	366	0	NE	3.4843	6.69723	2.56348	neg	Ext, Robot IDVET	28/03/2025	122	>100 d	7	0-50 d	129	100-200 d	MAG FAST768: 034	80 µl	neat
5127-31	31	2024-11-26	2024	Automn	11	B	10	> 5 years	121	>24months	F	01/01/2015	Blonde d'Aquitaine	Subclinical	31	pos	neg	neg	neg	neg	NI	NI	5	23.9	0	0	0	0	NE	0	0	0	0	NE	neg	neg	neg	neg	Ext. Robot IDVET	28/03/2025	122	>100 d	7	0-50 d	129	100-200 d	MAG FAST768: 034	80 µl	neat
5129-31	31	2024-11-26	2024	Automn	11	B	10	> 5 years	121	>24months	F	01/01/2015	Blonde d'Aquitaine	Subclinical	31	pos	pos	pos	pos	neg	16S-Mex-CMh-	DI	5	28.23	32.54	29.78	29.78	0	NE	962	22800	128	0	NE	2.98318	4.35793	2.10721	neg	Ext, Robot IDVET	28/03/2025	122	>100 d	7	0-50 d	129	100-200 d	MAG FAST768: 034	80 µl	neat
5136-31	31	2024-11-26	2024	Automn	11	B	10	> 5 years	121	>24months	F	01/01/2015	Blonde d'Aquitaine	Subclinical	31	pos	pos	neg	neg	neg	16S-	unknown	5	29.4	36.23	36.07	0	0	NE	non-quantifiable	0	0	0	NE	non-quantifiable	neg	neg	neg	Ext. Robot IDVET	28/03/2025	122	>100 d	7	0-50 d	129	100-200 d	MAG FAST768: 034	80 µl	neat
5142-31	31	2024-11-26	2024	Automn	11	B	9	> 5 years	108	>24months	F	01/01/2016	Blonde d'Aquitaine	Subclinical	31	pos	neg	neg	neg	neg	NI	NI	5	23.26	0	0	0	0	NE	0	0	0	0	NE	neg	neg	neg	neg	Ext. Robot IDVET	28/03/2025	122	>100 d	7	0-50 d	129	100-200 d	MAG FAST768: 034	80 µl	neat
5143-31	31	2024-11-26	2024	Automn	11	B	9	> 5 years	108	>24months	F	01/01/2016	Blonde d'Aquitaine	Subclinical	31	pos	neg	neg	neg	neg	NI	NI	5	23.4	39.41	37.36	37.36	0	NE	7.37	0	0	0	NE	0.867467	neg	neg	neg	Ext, Robot IDVET	28/03/2025	122	>100 d	7	0-50 d	129	100-200 d	MAG FAST768: 034	80 µl	neat
5145-31	31	2024-11-26	2024	Automn	11	B	9	> 5 years	108	>24months	F	01/01/2016	Blonde d'Aquitaine	Subclinical	31	pos	neg	neg	neg	neg	NI	NI	5	22.93	38.41	0	0	0	NE	0	0	0	0	NE	neg	neg	neg	neg	Ext. Robot IDVET	28/03/2025	122	>100 d	7	0-50 d	129	100-200 d	MAG FAST768: 034	80 µl	neat
6028-31	31	2024-11-26	2024	Automn	11	B	8	> 5 years	96	>24months	F	01/01/2017	Blonde d'Aquitaine	Subclinical	31	pos	pos	neg	neg	neg	16S-	unknown	5	22.36	32.64	30.52	0	0	NE	303	232	0	0	NE	2.48144	2.36549	neg	neg	Ext, Robot IDVET	28/03/2025	122	>100 d	7	0-50 d	129	100-200 d	MAG FAST768: 034	80 µl	neat
7730-31	31	2024-11-26	2024	Automn	11	B	8	> 5 years	96	>24months	F	01/01/2017	Blonde d'Aquitaine	Subclinical	31	pos	pos	neg	neg	neg	16S-	unknown	5	21.93	34.23	32.62	0	0	NE	127	6.73	0	0	NE	2.1038	0.828015	neg	neg	Ext, Robot IDVET	28/03/2025	122	>100 d	7	0-50 d	129	100-200 d	MAG FAST768: 034	80 µl	neat
8224-31	31	2024-11-26	2024	Automn	11	B	7	> 5 years	84	>24months	F	01/01/2018	Blonde d'Aquitaine	Subclinical	31	pos	pos	pos	pos	neg	16S-Mex-CMh-	DI	5	21.89	28.31	28.9	28.9	0	NE	7900	159000	186	0	NE	3.89763	5.2014	2.26951	neg	Ext, Robot IDVET	28/03/2025	122	>100 d	7	0-50 d	129	100-200 d	MAG FAST768: 034	80 µl	neat
8232-31	31	2024-11-26	2024	Automn	11	B	7	> 5 years	84	>24months	F	01/01/2018	Blonde d'Aquitaine	Subclinical	31	pos	pos	pos	pos	neg	16S-Mex-CMh-	DI	5	22.64	31.89	29.39	29.39	0	NE	1330	53900	151	0	NE	3.12385	4.73159	2.17898	neg	Ext, Robot IDVET	28/03/2025	122	>100 d	7	0-50 d	129	100-200 d	MAG FAST768: 034	80 µl	neat
9840-31	31	2024-11-26	2024	Automn	11	B	15	> 5 years	181	>24months	F	01/01/2010	Blonde d'Aquitaine	Subclinical	31	pos	neg	neg	neg	neg	NI	NI	5	23.8	0	36.9	36.9	0	NE	0	0	0	0	NE	neg	neg	neg	neg	Ext. Robot IDVET	28/03/2025	122	>100 d	7	0-50 d	129	100-200 d	MAG FAST768: 034	80 µl	neat
1815-27	27	2024-01-23	2024	Winter	1	D	3	3 years	33	>24months	F	28/04/2021	HF	Subclinical	42	pos	pos	pos	pos	neg	16S-Mex-CMh-	DI	5	16.08	27.84	28.34	26.78	0	NE	3500	1030	478	0	NE	3.54407	3.01284	2.67943	neg	Ext, Robot IDVET	03/04/2024	71	50-100 d	5	0-50 d	76	0-100 d	MAG FAST768: 034	80 µl	neat
1821-27	27	2024-01-23	2024	Winter	1	D	3	3 years	32	>24months	F	02/06/2021	HF	Subclinical	42	pos	pos	pos	pos	neg	16S-Mex-CMh-	DI	5	16.8	28.34	27.94	28.22	0	NE	2700	1410	164	0	NE	3.43136	3.14922	2.21484	neg	Ext, Robot IDVET	03/04/2024	71	50-100 d	5	0-50 d	76	0-100 d	MAG FAST768: 034	80 µl	neat
3862-27	27	2024-01-23	2024	Winter	1	D	8	> 5 years	96	>24months	M	14/03/2016	Aubrac	Subclinical	42	pos	pos	pos	pos	pos	16S-Mex-CMh-Mass	TI	5	18.37	29.76	31.23	28.18	32.5	NE	1300	106	169	27.8	NE	3.11394	2.02531	2.22789	1.44404	Ext, Robot IDVET	03/04/2024	71	50-100 d	5	0-50 d	76	0-100 d	MAG FAST768: 034	80 µl	neat
5040-27	27	2024-01-23	2024	Winter	1	D	5	4 -5 years	56	>24months	F	06/06/2019	crossbred	Subclinical	42	pos	pos	pos	pos	neg	16S-Mex-CMh-	DI	5	16.72	26.78	26.45	27.94	0	NE	6000	4560	202	0	NE	3.77815	3.65896	2.30535	neg	Ext, Robot IDVET	03/04/2024	71	50-100 d	5	0-50 d	76	0-100 d	MAG FAST768: 034	80 µl	neat
6937-27	27	2024-01-23	2024	Winter	1	D	5	4 -5 years	58	>24months	F	21/04/2019	Aubrac	Subclinical	42	pos	pos	pos	pos	neg	16S-Mex-CMh-	DI	5	18.33	31.45	31.23	30.97	0	NE	540	106	21.1	0	NE	2.73239	2.02531	1.32428	neg	Ext, Robot IDVET	03/04/2024	71	50-100 d	5	0-50 d	76	0-100 d	MAG FAST768: 034	80 µl	neat
7701-27	27	2024-01-23	2024	Winter	1	D	2	2 years	29	>24months	F	03/09/2021	Aubrac	Subclinical	42	pos	pos	pos	pos	neg	16S-Mex-CMh-	DI	5	17.8	31.02	29.92	30.8	0	NE	670	298	24	0	NE	2.82607	2.47422	1.38021	neg	Ext, Robot IDVET	03/04/2024	71	50-100 d	5	0-50 d	76	0-100 d	MAG FAST768: 034	80 µl	neat
8232-27	27	2024-01-23	2024	Winter	1	D	5	4 -5 years	60	>24months	F	12/02/2019	Aubrac	Subclinical	42	pos	pos	pos	pos	neg	16S-Mex-CMh-	DI	5	16.24	29.67	30.91	28.13	0	NE	1400	137	175	0	NE	3.14613	2.13672	2.24304	neg	Ext, Robot IDVET	03/04/2024	71	50-100 d	5	0-50 d	76	0-100 d	MAG FAST768: 034	80 µl	neat
8457-27	27	2024-01-23	2024	Winter	1	D	7	> 5 years	85	>24months	F	06/02/2017	Aubrac	Subclinical	42	pos	pos	pos	neg	pos	16S-Mex-Mass	DI	5	16.7	31.44	33.13	36.48	32.46	NE	540	non-quantifiable	0	28.8	NE	2.73239	non-quantifiable	neg	1.45939	Ext, Robot IDVET	03/04/2024	71	50-100 d	5	0-50 d	76	0-100 d	MAG FAST768: 034	80 µl	neat
8498-27	27	2024-01-23	2024	Winter	1	D	6	> 5 years	74	>24months	F	26/12/2017	Aubrac	Subclinical	42	pos	pos	pos	pos	neg	16S-Mex-CMh-	DI	5	21.7	30.38	31.06	30.52	0	NE	940	122	29.5	0	NE	2.97313	2.08636	1.46982	neg	Ext, Robot IDVET	03/04/2024	71	50-100 d	5	0-50 d	76	0-100 d	MAG FAST768: 034	80 µl	neat
9261-27	27	2024-01-23	2024	Winter	1	D	13	> 5 years	156	>24months	F	19/03/2011	Aubrac	Subclinical	42	pos	pos	neg	neg	neg	16S-	unknown	5	18.41	36.63	0	36.61	36.77	NE	non-quantifiable	0	0	0	NE	non-quantifiable	neg	neg	neg	Ext. Robot IDVET	03/04/2024	71	50-100 d	5	0-50 d	76	0-100 d	MAG FAST768: 034	80 µl	neat
968-27	27	2024-01-23	2024	Winter	1	D	9	> 5 years	112	>24months	F	12/11/2014	Aubrac	Subclinical	42	pos	pos	pos	pos	neg	16S-Mex-CMh-	DI	5	18.72	33.34	34.42	35.75	0	NE	200	non-quantifiable	non-quantifiable	0	NE	2.30103	non-quantifiable	non-quantifiable	neg	Ext, Robot IDVET	03/04/2024	71	50-100 d	5	0-50 d	76	0-100 d	MAG FAST768: 034	80 µl	neat
1331-19	19	2024-02-27	2024	Winter	2	B	13	> 5 years	158	>24months	F	11/03/2011	Limousine	Subclinical	42	pos	neg	neg	neg	neg	NI	NI	5	20.98	0	0	0	0	NE	0	0	0	0	NE	neg	neg	neg	neg	Ext. Robot IDVET	07/05/2024	70	50-100 d	27	0-50 d	97	0-100 d	MAG FAST768: 034	80 µl	neat
1353-19	19	2024-02-27	2024	Winter	2	B	13	> 5 years	157	>24months	F	17/04/2011	Limousine	Subclinical	42	pos	pos	pos	pos	neg	16S-Mex-CMh-	DI	5	22	31.51	35.82	29.48	0	NE	15000	non-quantifiable	87.7	0	NE	4.17609	non-quantifiable	1.943	neg	Ext, Robot IDVET	07/05/2024	70	50-100 d	27	0-50 d	97	0-100 d	MAG FAST768: 034	80 µl	neat
207-19	19	2024-02-27	2024	Winter	2	B	14	> 5 years	169	>24months	F	21/04/2010	Limousine	Subclinical	42	pos	pos	neg	pos	neg	16S-CMh-	MI	5	20.19	37.52	0	33.37	0	NE	non-quantifiable	0	non-quantifiable	0	NE	non-quantifiable	neg	non-quantifiable	neg	Ext. Robot IDVET	07/05/2024	70	50-100 d	27	0-50 d	97	0-100 d	MAG FAST768: 034	80 µl	neat
320-19	19	2024-02-27	2024	Winter	2	B	18	> 5 years	218	>24months	F	29/03/2006	Limousine	Subclinical	42	pos	pos	pos	neg	neg	16S-Mex-	MI	5	21.16	34.67	35.9	0	0	NE	3000	non-quantifiable	0	0	NE	3.47712	non-quantifiable	neg	neg	Ext, Robot IDVET	07/05/2024	70	50-100 d	27	0-50 d	97	0-100 d	MAG FAST768: 034	80 µl	neat
3295-19	19	2024-02-27	2024	Winter	2	B	17	> 5 years	207	>24months	F	13/03/2007	Limousine	Subclinical	42	pos	neg	neg	neg	neg	NI	NI	5	22.13	0	0	0	0	NE	0	0	0	0	NE	neg	neg	neg	neg	Ext. Robot IDVET	07/05/2024	70	50-100 d	27	0-50 d	97	0-100 d	MAG FAST768: 034	80 µl	neat
3342-19	19	2024-02-27	2024	Winter	2	B	16	> 5 years	196	>24months	F	17/01/2008	Limousine	Subclinical	42	pos	pos	neg	neg	neg	16S-	unknown	5	22.35	36.25	37.1	0	0	NE	non-quantifiable	0	0	0	NE	non-quantifiable	neg	neg	neg	Ext. Robot IDVET	07/05/2024	70	50-100 d	27	0-50 d	97	0-100 d	MAG FAST768: 034	80 µl	neat
5586-19	19	2024-02-27	2024	Winter	2	B	15	> 5 years	183	>24months	F	19/02/2009	Limousine	Subclinical	42	pos	neg	neg	pos	neg	CMh-	unknown	5	21.67	0	0	35.69	0	NE	0	0	non-quantifiable	0	NE	neg	neg	non-quantifiable	neg	Ext. Robot IDVET	07/05/2024	70	50-100 d	27	0-50 d	97	0-100 d	MAG FAST768: 034	80 µl	neat
6414-19	19	2024-02-27	2024	Winter	2	B	3	3 years	36	>24months	F	02/03/2021	Limousine	Subclinical	42	pos	neg	neg	neg	neg	NI	NI	5	20.68	0	0	0	0	NE	0	0	0	0	NE	neg	neg	neg	neg	Ext. Robot IDVET	07/05/2024	70	50-100 d	27	0-50 d	97	0-100 d	MAG FAST768: 034	80 µl	neat
6609-19	19	2024-02-27	2024	Winter	2	B	7	> 5 years	91	>24months	M	09/09/2016	Limousine	Subclinical	42	pos	neg	neg	neg	neg	NI	NI	5	22.12	38.5	0	36.42	0	NE	0	0	0	0	NE	neg	neg	neg	neg	Ext. Robot IDVET	07/05/2024	70	50-100 d	27	0-50 d	97	0-100 d	MAG FAST768: 034	80 µl	neat
7057-19	19	2024-02-27	2024	Winter	2	B	6	> 5 years	73	>24months	F	19/02/2018	Limousine	Subclinical	42	pos	pos	pos	pos	pos	16S-Mex-CMh-Mass	TI	5	20.25	28.49	30.97	35.26	30.31	NE	26000	210	non-quantifiable	384	NE	4.41497	2.32222	non-quantifiable	2.58433	Ext, Robot IDVET	07/05/2024	70	50-100 d	27	0-50 d	97	0-100 d	MAG FAST768: 034	80 µl	neat
7071-19	19	2024-02-27	2024	Winter	2	B	6	> 5 years	73	>24months	F	25/02/2018	Limousine	Subclinical	42	pos	pos	neg	neg	pos	16S-Mass	MI	5	20.24	30	0	36.95	30.92	NE	21000	0	0	265	NE	4.32222	neg	neg	2.42325	Ext, Robot IDVET	07/05/2024	70	50-100 d	27	0-50 d	97	0-100 d	MAG FAST768: 034	80 µl	neat
7077-19	19	2024-02-27	2024	Winter	2	B	7	> 5 years	81	>24months	F	29/06/2017	Limousine	Subclinical	42	pos	pos	neg	neg	neg	16S-	unknown	5	19.88	35.15	0	37.7	36.02	NE	non-quantifiable	0	0	0	NE	non-quantifiable	neg	neg	neg	Ext. Robot IDVET	07/05/2024	70	50-100 d	27	0-50 d	97	0-100 d	MAG FAST768: 034	80 µl	neat
8024-19	19	2024-02-27	2024	Winter	2	B	10	> 5 years	120	>24months	F	18/04/2014	Limousine	Subclinical	42	pos	pos	pos	neg	neg	16S-Mex-	MI	5	20.3	36.47	35.91	36.7	0	NE	non-quantifiable	non-quantifiable	0	0	NE	non-quantifiable	non-quantifiable	neg	neg	Ext. Robot IDVET	07/05/2024	70	50-100 d	27	0-50 d	97	0-100 d	MAG FAST768: 034	80 µl	neat
8025-19	19	2024-02-27	2024	Winter	2	B	10	> 5 years	121	>24months	F	18/03/2014	Limousine	Subclinical	42	pos	pos	neg	pos	neg	16S-CMh-	MI	5	22.09	37.12	0	34.87	0	NE	non-quantifiable	0	non-quantifiable	0	NE	non-quantifiable	neg	non-quantifiable	neg	Ext. Robot IDVET	07/05/2024	70	50-100 d	27	0-50 d	97	0-100 d	MAG FAST768: 034	80 µl	neat
8030-19	19	2024-02-27	2024	Winter	2	B	10	> 5 years	121	>24months	F	29/03/2014	Limousine	Subclinical	42	pos	pos	neg	pos	pos	16S-CMh-Mass	DI	5	20.82	25.06	0	33.87	26.72	NE	39000	0	non-quantifiable	3420	NE	4.59106	neg	non-quantifiable	3.53403	Ext, Robot IDVET	07/05/2024	70	50-100 d	27	0-50 d	97	0-100 d	MAG FAST768: 034	80 µl	neat
8137-19	19	2024-02-27	2024	Winter	2	B	4	4 -5 years	49	>24months	F	18/02/2020	Limousine	Subclinical	42	pos	pos	neg	pos	neg	16S-CMh-	MI	5	19.8	25.85	0	23.84	0	NE	36000	0	10600	0	NE	4.5563	neg	4.02531	neg	Ext, Robot IDVET	07/05/2024	70	50-100 d	27	0-50 d	97	0-100 d	MAG FAST768: 034	80 µl	neat
8150-19	19	2024-02-27	2024	Winter	2	B	4	4 -5 years	48	>24months	F	07/03/2020	Limousine	Subclinical	42	pos	pos	pos	pos	neg	16S-Mex-CMh-	DI	5	20.4	28.36	28.26	29.47	0	NE	27000	1720	88.4	0	NE	4.43136	3.23553	1.94645	neg	Ext, Robot IDVET	07/05/2024	70	50-100 d	27	0-50 d	97	0-100 d	MAG FAST768: 034	80 µl	neat
8152-19	19	2024-02-27	2024	Winter	2	B	4	4 -5 years	48	>24months	F	07/03/2020	Limousine	Subclinical	42	pos	neg	neg	pos	neg	CMh-	unknown	5	20.79	0	0	33.69	0	NE	0	0	non-quantifiable	0	NE	neg	neg	non-quantifiable	neg	Ext. Robot IDVET	07/05/2024	70	50-100 d	27	0-50 d	97	0-100 d	MAG FAST768: 034	80 µl	neat
8573-19	19	2024-02-27	2024	Winter	2	B	8	> 5 years	101	>24months	M	01/11/2015	Limousine	Subclinical	42	pos	pos	neg	neg	neg	16S-	unknown	5	22.64	36.34	0	0	0	NE	non-quantifiable	0	0	0	NE	non-quantifiable	neg	neg	neg	Ext. Robot IDVET	07/05/2024	70	50-100 d	27	0-50 d	97	0-100 d	MAG FAST768: 034	80 µl	neat
9140-19	19	2024-02-27	2024	Winter	2	B	8	> 5 years	96	>24months	F	06/04/2016	Limousine	Subclinical	42	pos	pos	pos	pos	neg	16S-Mex-CMh-	DI	5	20.41	30.88	32.19	29.44	0	NE	17000	81.4	90.7	0	NE	4.23045	1.91062	1.95761	neg	Ext, Robot IDVET	07/05/2024	70	50-100 d	27	0-50 d	97	0-100 d	MAG FAST768: 034	80 µl	neat
9413-19	19	2024-02-27	2024	Winter	2	B	5	4 -5 years	60	>24months	F	18/03/2019	Limousine	Subclinical	42	pos	pos	neg	neg	neg	16S-	unknown	5	21.64	33.64	0	0	37.5	NE	6900	0	0	0	NE	3.83885	neg	neg	neg	Ext, Robot IDVET	07/05/2024	70	50-100 d	27	0-50 d	97	0-100 d	MAG FAST768: 034	80 µl	neat
1147-10	10	2024-01-30	2024	Winter	1	B	2	2 years	26	>24months	M	10/12/2021	Aubrac	Subclinical	42	pos	pos	pos	pos	neg	16S-Mex-CMh-	DI	5	19.82	26.85	26.17	27.44	0	NE	2800	8440	428	0	NE	3.44716	3.92634	2.63144	neg	Ext, Robot IDVET	05/04/2024	66	50-100 d	27	0-50 d	93	0-100 d	MAG FAST768: 034	80 µl	neat
1249-10	10	2024-01-30	2024	Winter	1	B	4	4 -5 years	50	>24months	F	01/01/2020	Aubrac	Subclinical	42	pos	pos	neg	pos	neg	16S-CMh-	MI	5	19.27	29.03	0	25.75	36.75	NE	860	0	1570	0	NE	2.9345	neg	3.1959	neg	Ext, Robot IDVET	05/04/2024	66	50-100 d	27	0-50 d	93	0-100 d	MAG FAST768: 034	80 µl	neat
1389-10	10	2024-01-30	2024	Winter	1	B	4	4 -5 years	48	>24months	F	16/02/2020	Aubrac	Subclinical	42	pos	pos	neg	pos	neg	16S-CMh-	MI	5	19.43	29.45	0	26.47	38.09	NE	680	0	902	0	NE	2.83251	neg	2.95521	neg	Ext, Robot IDVET	05/04/2024	66	50-100 d	27	0-50 d	93	0-100 d	MAG FAST768: 034	80 µl	neat
207-10	10	2024-01-30	2024	Winter	1	B	3	3 years	38	>24months	F	09/12/2020	Aubrac	Subclinical	42	pos	neg	neg	neg	neg	NI	NI	5	18.91	0	0	37.3	0	NE	0	0	0	0	NE	neg	neg	neg	neg	Ext. Robot IDVET	05/04/2024	66	50-100 d	27	0-50 d	93	0-100 d	MAG FAST768: 034	80 µl	neat
208-10	10	2024-01-30	2024	Winter	1	B	3	3 years	38	>24months	F	09/12/2020	Aubrac	Subclinical	42	pos	pos	pos	pos	neg	16S-Mex-CMh-	DI	5	19.28	28.08	31.48	25.24	0	NE	1400	106	2320	0	NE	3.14613	2.02531	3.36549	neg	Ext, Robot IDVET	05/04/2024	66	50-100 d	27	0-50 d	93	0-100 d	MAG FAST768: 034	80 µl	neat
211-10	10	2024-01-30	2024	Winter	1	B	3	3 years	38	>24months	F	11/12/2020	Aubrac	Subclinical	42	pos	pos	neg	pos	neg	16S-CMh-	MI	5	18.82	31.01	0	27.74	0	NE	290	0	340	0	NE	2.4624	neg	2.53148	neg	Ext, Robot IDVET	05/04/2024	66	50-100 d	27	0-50 d	93	0-100 d	MAG FAST768: 034	80 µl	neat
214-10	10	2024-01-30	2024	Winter	1	B	3	3 years	38	>24months	F	19/12/2020	Aubrac	Subclinical	42	pos	pos	pos	pos	neg	16S-Mex-CMh-	DI	5	20.41	27.45	26.71	33.72	0	NE	2000	5410	non-quantifiable	0	NE	3.30103	3.7332	non-quantifiable	neg	Ext, Robot IDVET	05/04/2024	66	50-100 d	27	0-50 d	93	0-100 d	MAG FAST768: 034	80 µl	neat
2325-10	10	2024-01-30	2024	Winter	1	B	10	> 5 years	121	>24months	F	09/02/2014	Aubrac	Subclinical	42	pos	pos	pos	pos	neg	16S-Mex-CMh-	DI	5	18.58	27.49	26.79	28.56	0	NE	2000	5060	181	0	NE	3.30103	3.70415	2.25768	neg	Ext, Robot IDVET	05/04/2024	66	50-100 d	27	0-50 d	93	0-100 d	MAG FAST768: 034	80 µl	neat
2341-10	10	2024-01-30	2024	Winter	1	B	10	> 5 years	121	>24months	F	05/03/2014	Aubrac	Subclinical	42	pos	pos	neg	pos	neg	16S-CMh-	MI	5	19.87	34.38	0	31.94	0	NE	46	0	13.5	0	NE	1.66276	neg	1.13033	neg	Ext, Robot IDVET	05/04/2024	66	50-100 d	27	0-50 d	93	0-100 d	MAG FAST768: 034	80 µl	neat
2345-10	10	2024-01-30	2024	Winter	1	B	10	> 5 years	120	>24months	F	22/03/2014	Aubrac	Subclinical	42	pos	pos	pos	pos	pos	16S-Mex-CMh-Mass	TI	5	19.62	29.36	29.71	26.88	33.2	NE	720	457	658	non-quantifiable	NE	2.85733	2.65992	2.81823	non-quantifiable	Ext, Robot IDVET	05/04/2024	66	50-100 d	27	0-50 d	93	0-100 d	MAG FAST768: 034	80 µl	neat
3499-10	10	2024-01-30	2024	Winter	1	B	2	2 years	26	>24months	F	17/12/2021	Aubrac	Subclinical	42	pos	pos	pos	pos	neg	16S-Mex-CMh-	DI	5	19.16	30.58	29.26	33.15	0	NE	370	662	non-quantifiable	0	NE	2.5682	2.82086	non-quantifiable	neg	Ext, Robot IDVET	05/04/2024	66	50-100 d	27	0-50 d	93	0-100 d	MAG FAST768: 034	80 µl	neat
3502-10	10	2024-01-30	2024	Winter	1	B	2	2 years	25	>24months	F	29/12/2021	Aubrac	Subclinical	42	pos	pos	pos	pos	pos	16S-Mex-CMh-Mass	TI	5	19.79	28.22	28.49	33.78	30.37	NE	1300	1250	non-quantifiable	335	NE	3.11394	3.09691	non-quantifiable	2.52504	Ext, Robot IDVET	05/04/2024	66	50-100 d	27	0-50 d	93	0-100 d	MAG FAST768: 034	80 µl	neat
3503-10	10	2024-01-30	2024	Winter	1	B	2	2 years	25	>24months	F	30/12/2021	Aubrac	Subclinical	42	pos	pos	pos	pos	pos	16S-Mex-CMh-Mass	TI	5	18.53	29.78	29.32	35.47	31.37	NE	570	630	non-quantifiable	177	NE	2.75587	2.79934	non-quantifiable	2.24797	Ext, Robot IDVET	05/04/2024	66	50-100 d	27	0-50 d	93	0-100 d	MAG FAST768: 034	80 µl	neat
4007-10	10	2024-01-30	2024	Winter	1	B	13	> 5 years	157	>24months	F	03/03/2011	Aubrac	Subclinical	42	pos	neg	neg	neg	neg	NI	NI	5	21.06	0	0	0	0	NE	0	0	0	0	NE	neg	neg	neg	neg	Ext. Robot IDVET	05/04/2024	66	50-100 d	27	0-50 d	93	0-100 d	MAG FAST768: 034	80 µl	neat
4799-10	10	2024-01-30	2024	Winter	1	B	3	3 years	38	>24months	F	03/12/2020	Aubrac	Subclinical	42	pos	pos	neg	pos	neg	16S-CMh-	MI	5	19.64	37.25	0	35.19	0	NE	non-quantifiable	0	non-quantifiable	0	NE	non-quantifiable	neg	non-quantifiable	neg	Ext. Robot IDVET	05/04/2024	66	50-100 d	27	0-50 d	93	0-100 d	MAG FAST768: 034	80 µl	neat
6166-10	10	2024-01-30	2024	Winter	1	B	5	4 -5 years	60	>24months	F	15/02/2019	Aubrac	Subclinical	42	pos	pos	neg	neg	pos	16S-Mass	MI	5	19.08	30.32	0	0	31.16	NE	420	0	0	202	NE	2.62325	neg	neg	2.30535	Ext, Robot IDVET	05/04/2024	66	50-100 d	27	0-50 d	93	0-100 d	MAG FAST768: 034	80 µl	neat
67-10	10	2024-01-30	2024	Winter	1	B	2	2 years	26	>24months	M	23/12/2021	Aubrac	Subclinical	42	pos	pos	neg	pos	neg	16S-CMh-	MI	5	18.4	31.38	0	28.48	0	NE	240	0	193	0	NE	2.38021	neg	2.28556	neg	Ext, Robot IDVET	05/04/2024	66	50-100 d	27	0-50 d	93	0-100 d	MAG FAST768: 034	80 µl	neat
8018-10	10	2024-01-30	2024	Winter	1	B	8	> 5 years	98	>24months	F	02/01/2016	Aubrac	Subclinical	42	pos	pos	pos	pos	neg	16S-Mex-CMh-	DI	5	19.14	26.06	27.04	33.6	0	NE	4400	4120	non-quantifiable	0	NE	3.64345	3.6149	non-quantifiable	neg	Ext, Robot IDVET	05/04/2024	66	50-100 d	27	0-50 d	93	0-100 d	MAG FAST768: 034	80 µl	neat
9018-10	10	2024-01-30	2024	Winter	1	B	13	> 5 years	159	>24months	F	12/01/2011	Aubrac	Subclinical	42	pos	pos	neg	pos	neg	16S-CMh-	MI	5	19.32	35.33	0	31.81	0	NE	non-quantifiable	0	14.9	0	NE	non-quantifiable	neg	1.173186268412274	neg	Ext. Robot IDVET	05/04/2024	66	50-100 d	27	0-50 d	93	0-100 d	MAG FAST768: 034	80 µl	neat
9164-10	10	2024-01-30	2024	Winter	1	B	10	> 5 years	123	>24months	F	17/12/2013	Aubrac	Subclinical	42	pos	pos	pos	pos	neg	16S-Mex-CMh-	DI	5	18.69	37.28	34.78	34.18	0	NE	non-quantifiable	non-quantifiable	non-quantifiable	0	NE	non-quantifiable	non-quantifiable	non-quantifiable	neg	Ext. Robot IDVET	05/04/2024	66	50-100 d	27	0-50 d	93	0-100 d	MAG FAST768: 034	80 µl	neat
7290-21	21	2024-02-28	2024	Winter	2	B	4	4 -5 years	45	>24months	F	10/06/2020	Charolaise	Subclinical	42	pos	pos	pos	pos	neg	16S-Mex-CMh-	DI	5	19.47	31.23	32.11	29.45	0	NE	16000	86.6	89.9	0	NE	4.20412	1.93752	1.95376	neg	Ext, Robot IDVET	07/05/2024	69	50-100 d	27	0-50 d	96	0-100 d	MAG FAST768: 034	80 µl	neat
8403-21	21	2024-02-28	2024	Winter	2	B	2	2 years	27	>24months	F	26/11/2021	Charolaise	Subclinical	42	pos	pos	pos	pos	neg	16S-Mex-CMh-	DI	5	19.54	27.98	28.4	26.07	0	NE	28000	1550	1600	0	NE	4.44716	3.19033	3.20412	neg	Ext, Robot IDVET	07/05/2024	69	50-100 d	27	0-50 d	96	0-100 d	MAG FAST768: 034	80 µl	neat
1154-21	21	2024-02-28	2024	Winter	2	B	12	> 5 years	146	>24months	F	11/03/2012	Charolaise	Subclinical	42	pos	pos	pos	pos	neg	16S-Mex-CMh-	DI	5	20.8	29.9	34.98	27.23	0	NE	430	non-quantifiable	582	0	NE	2.63347	non-quantifiable	2.76492	neg	Ext, Robot IDVET	16/05/2024	78	50-100 d	19	0-50 d	97	0-100 d	MAG FAST768: 034	80 µl	neat
1700-21	21	2024-02-28	2024	Winter	2	B	6	> 5 years	76	>24months	M	13/12/2017	Charolaise	Subclinical	42	pos	pos	neg	pos	pos	16S-CMh-Mass	DI	5	21.77	30.3	0	29.53	32.34	NE	337	0	87.1	53.5	NE	2.52763	neg	1.94002	1.72835	Ext, Robot IDVET	16/05/2024	78	50-100 d	19	0-50 d	97	0-100 d	MAG FAST768: 034	80 µl	neat
1707-21	21	2024-02-28	2024	Winter	2	B	6	> 5 years	73	>24months	F	16/03/2018	Charolaise	Subclinical	42	pos	pos	pos	pos	neg	16S-Mex-CMh-	DI	5	20.16	27	26.97	30.13	0	NE	2500	4120	53.1	0	NE	3.39794	3.6149	1.72509	neg	Ext, Robot IDVET	16/05/2024	78	50-100 d	19	0-50 d	97	0-100 d	MAG FAST768: 034	80 µl	neat
2419-21	21	2024-02-28	2024	Winter	2	B	3	3 years	42	>24months	M	07/09/2020	Charolaise	Subclinical	42	pos	pos	pos	pos	neg	16S-Mex-CMh-	DI	5	20.88	28.68	28.77	29.89	0	NE	900	857	64.7	0	NE	2.95424	2.93298	1.8109	neg	Ext, Robot IDVET	16/05/2024	78	50-100 d	19	0-50 d	97	0-100 d	MAG FAST768: 034	80 µl	neat
2744-21	21	2024-02-28	2024	Winter	2	B	3	3 years	37	>24months	F	18/02/2021	Charolaise	Subclinical	42	pos	pos	pos	pos	pos	16S-Mex-CMh-Mass	TI	5	19.87	27.31	28.63	27.14	30.34	NE	2070	968	626	221	NE	3.31597	2.98588	2.79657	2.34439	Ext, Robot IDVET	16/05/2024	78	50-100 d	19	0-50 d	97	0-100 d	MAG FAST768: 034	80 µl	neat
7273-21	21	2024-02-28	2024	Winter	2	B	4	4 -5 years	49	>24months	F	23/02/2020	Charolaise	Subclinical	42	pos	pos	pos	neg	pos	16S-Mex-Mass	DI	5	20.29	27.31	27.2	0	32.77	NE	2070	3370	0	39.4	NE	3.31597	3.52763	neg	1.5955	Ext, Robot IDVET	16/05/2024	78	50-100 d	19	0-50 d	97	0-100 d	MAG FAST768: 034	80 µl	neat
7280-21	21	2024-02-28	2024	Winter	2	B	4	4 -5 years	49	>24months	F	03/03/2020	Charolaise	Subclinical	42	pos	pos	neg	pos	neg	16S-CMh-	MI	5	20.41	28.44	0	26.44	0	NE	1040	0	1120	0	NE	3.01703	neg	3.04922	neg	Ext, Robot IDVET	16/05/2024	78	50-100 d	19	0-50 d	97	0-100 d	MAG FAST768: 034	80 µl	neat
7296-21	21	2024-02-28	2024	Winter	2	B	4	4 -5 years	44	>24months	F	15/07/2020	Aubrac	Subclinical	42	pos	pos	neg	neg	neg	16S-	unknown	5	20.02	37.06	35.7	0	0	NE	non-quantifiable	0	0	0	NE	non-quantifiable	neg	neg	neg	Ext. Robot IDVET	16/05/2024	78	50-100 d	19	0-50 d	97	0-100 d	MAG FAST768: 034	80 µl	neat
7600-21	21	2024-02-28	2024	Winter	2	B	13	> 5 years	152	>24months	F	25/08/2011	Charolaise	Subclinical	42	pos	pos	pos	neg	neg	16S-Mex-	MI	5	21.13	33.14	34.91	36.6	0	NE	60.1	non-quantifiable	0	0	NE	1.77887	non-quantifiable	neg	neg	Ext, Robot IDVET	16/05/2024	78	50-100 d	19	0-50 d	97	0-100 d	MAG FAST768: 034	80 µl	neat
7941-21	21	2024-02-28	2024	Winter	2	B	7	> 5 years	85	>24months	F	28/02/2017	Charolaise	Subclinical	42	pos	pos	pos	pos	neg	16S-Mex-CMh-	DI	5	19.67	28.91	32.91	27.2	0	NE	783	23.1	596	0	NE	2.89376	1.36361	2.77525	neg	Ext, Robot IDVET	16/05/2024	78	50-100 d	19	0-50 d	97	0-100 d	MAG FAST768: 034	80 µl	neat
8416-21	21	2024-02-28	2024	Winter	2	B	2	2 years	26	>24months	F	06/01/2022	Aubrac	Subclinical	42	pos	pos	pos	pos	neg	16S-Mex-CMh-	DI	5	21.21	29.3	29.4	27.85	0	NE	618	494	349	0	NE	2.79099	2.69373	2.54283	neg	Ext, Robot IDVET	16/05/2024	78	50-100 d	19	0-50 d	97	0-100 d	MAG FAST768: 034	80 µl	neat
9192-21	21	2024-02-28	2024	Winter	2	B	9	> 5 years	104	>24months	F	11/08/2015	Aubrac	Subclinical	42	pos	pos	neg	pos	pos	16S-CMh-Mass	DI	5	20.28	31.94	0	35.24	32.99	NE	125	0	non-quantifiable	33.7	NE	2.09691	neg	non-quantifiable	1.52763	Ext, Robot IDVET	16/05/2024	78	50-100 d	19	0-50 d	97	0-100 d	MAG FAST768: 034	80 µl	neat
1751-14	14	2024-01-24	2024	Winter	1	B	6	> 5 years	75	>24months	F	13/11/2017	Limousine	Subclinical	42	pos	pos	neg	pos	neg	16S-CMh-	MI	5	19.81	36.06	0	34.51	35.35	NE	40.6	0	non-quantifiable	0	NE	1.60853	neg	non-quantifiable	neg	Ext, Robot IDVET	05/04/2024	72	50-100 d	7	0-50 d	79	0-100 d	MAG FAST768: 034	80 µl	neat
1753-14	14	2024-01-24	2024	Winter	1	B	6	> 5 years	73	>24months	F	12/01/2018	Limousine	Subclinical	42	pos	pos	pos	neg	neg	16S-Mex-	MI	5	19.1	36.04	34.83	37.3	0	NE	non-quantifiable	non-quantifiable	0	0	NE	non-quantifiable	non-quantifiable	neg	neg	Ext. Robot IDVET	05/04/2024	72	50-100 d	7	0-50 d	79	0-100 d	MAG FAST768: 034	80 µl	neat
1870-14	14	2024-01-24	2024	Winter	1	B	9	> 5 years	106	>24months	F	04/05/2015	Limousine	Subclinical	42	pos	neg	neg	neg	neg	NI	NI	5	20.17	0	0	36.49	0	NE	0	0	0	0	NE	neg	neg	neg	neg	Ext. Robot IDVET	05/04/2024	72	50-100 d	7	0-50 d	79	0-100 d	MAG FAST768: 034	80 µl	neat
1882-14	14	2024-01-24	2024	Winter	1	B	9	> 5 years	104	>24months	F	22/07/2015	Limousine	Subclinical	42	pos	pos	pos	neg	pos	16S-Mex-Mass	DI	5	19.68	33.48	33.68	36.73	31.5	NE	420	17.4	0	163	NE	2.62325	1.24055	neg	2.21219	Ext, Robot IDVET	05/04/2024	72	50-100 d	7	0-50 d	79	0-100 d	MAG FAST768: 034	80 µl	neat
4110-14	14	2024-01-24	2024	Winter	1	B	5	4 -5 years	56	>24months	F	13/06/2019	Limousine	Subclinical	42	pos	pos	neg	pos	neg	16S-CMh-	MI	5	19.33	36.27	0	34.14	0	NE	35.7	0	non-quantifiable	0	NE	1.55267	neg	non-quantifiable	neg	Ext, Robot IDVET	05/04/2024	72	50-100 d	7	0-50 d	79	0-100 d	MAG FAST768: 034	80 µl	neat
4117-14	14	2024-01-24	2024	Winter	1	B	4	4 -5 years	51	>24months	F	12/11/2019	Limousine	Subclinical	42	pos	pos	neg	pos	neg	16S-CMh-	MI	5	20.03	34.25	0	30.35	0	NE	124	0	45.8	0	NE	2.09342	neg	1.66087	neg	Ext, Robot IDVET	05/04/2024	72	50-100 d	7	0-50 d	79	0-100 d	MAG FAST768: 034	80 µl	neat
4129-14	14	2024-01-24	2024	Winter	1	B	4	4 -5 years	45	>24months	F	27/05/2020	Limousine	Subclinical	42	pos	pos	neg	pos	neg	16S-CMh-	MI	5	19.07	32.99	0	29.22	36.84	NE	269	0	109	0	NE	2.42975	neg	2.03743	neg	Ext, Robot IDVET	05/04/2024	72	50-100 d	7	0-50 d	79	0-100 d	MAG FAST768: 034	80 µl	neat
4130-14	14	2024-01-24	2024	Winter	1	B	4	4 -5 years	44	>24months	F	31/05/2020	Limousine	Subclinical	42	pos	pos	pos	neg	neg	16S-Mex-	MI	5	18.54	32.8	30.31	36.27	0	NE	730	279	0	0	NE	2.86332	2.4456	neg	neg	Ext, Robot IDVET	05/04/2024	72	50-100 d	7	0-50 d	79	0-100 d	MAG FAST768: 034	80 µl	neat
7645-14	14	2024-01-24	2024	Winter	1	B	8	> 5 years	93	>24months	F	28/05/2016	Limousine	Subclinical	42	pos	neg	neg	neg	neg	NI	NI	5	18.87	0	0	0	0	NE	0	0	0	0	NE	neg	neg	neg	neg	Ext. Robot IDVET	05/04/2024	72	50-100 d	7	0-50 d	79	0-100 d	MAG FAST768: 034	80 µl	neat
7650-14	14	2024-01-24	2024	Winter	1	B	7	> 5 years	91	>24months	F	02/08/2016	Limousine	Subclinical	42	pos	pos	pos	pos	neg	16S-Mex-CMh-	DI	5	19.2	36.91	34.23	33.99	0	NE	24.1	non-quantifiable	non-quantifiable	0	NE	1.38202	non-quantifiable	non-quantifiable	neg	Ext, Robot IDVET	05/04/2024	72	50-100 d	7	0-50 d	79	0-100 d	MAG FAST768: 034	80 µl	neat
8213-14	14	2024-01-24	2024	Winter	1	B	2	2 years	30	>24months	F	14/08/2021	Limousine	Subclinical	42	pos	neg	pos	pos	neg	Mex-CMh-	unknown	5	18.89	39.07	31.68	27.28	0	NE	0	90.3	484	0	NE	neg	1.9556877503135057	2.6848453616444123	neg	Ext. Robot IDVET	05/04/2024	72	50-100 d	7	0-50 d	79	0-100 d	MAG FAST768: 034	80 µl	neat
8217-14	14	2024-01-24	2024	Winter	1	B	2	2 years	27	>24months	F	23/10/2021	Limousine	Subclinical	42	pos	pos	pos	neg	neg	16S-Mex-	MI	5	18.96	34.7	30.06	0	0	NE	160	343	0	0	NE	2.20412	2.53529	neg	neg	Ext, Robot IDVET	05/04/2024	72	50-100 d	7	0-50 d	79	0-100 d	MAG FAST768: 034	80 µl	neat
8218-14	14	2024-01-24	2024	Winter	1	B	2	2 years	27	>24months	F	23/10/2021	Limousine	Subclinical	42	pos	pos	pos	pos	neg	16S-Mex-CMh-	DI	5	20.28	33.55	26.62	28.29	0	NE	400	5820	223	0	NE	2.60206	3.76492	2.3483	neg	Ext, Robot IDVET	05/04/2024	72	50-100 d	7	0-50 d	79	0-100 d	MAG FAST768: 034	80 µl	neat
8220-14	14	2024-01-24	2024	Winter	1	B	2	2 years	27	>24months	F	05/11/2021	Limousine	Subclinical	42	pos	pos	pos	pos	neg	16S-Mex-CMh-	DI	5	18.89	29.29	27.31	29.13	0	NE	13000	3300	117	0	NE	4.11394	3.51851	2.06819	neg	Ext, Robot IDVET	05/04/2024	72	50-100 d	7	0-50 d	79	0-100 d	MAG FAST768: 034	80 µl	neat
8221-14	14	2024-01-24	2024	Winter	1	B	2	2 years	27	>24months	F	06/11/2021	Limousine	Subclinical	42	pos	pos	pos	pos	neg	16S-Mex-CMh-	DI	5	18.6	30.19	32.23	26.88	0	NE	1500	57.4	658	0	NE	3.17609	1.75891	2.81823	neg	Ext, Robot IDVET	05/04/2024	72	50-100 d	7	0-50 d	79	0-100 d	MAG FAST768: 034	80 µl	neat
8222-14	14	2024-01-24	2024	Winter	1	B	2	2 years	27	>24months	F	15/11/2021	Limousine	Subclinical	42	pos	pos	pos	pos	neg	16S-Mex-CMh-	DI	5	19.03	30.56	26.12	28.86	0	NE	4500	8790	144	0	NE	3.65321	3.94399	2.15836	neg	Ext, Robot IDVET	05/04/2024	72	50-100 d	7	0-50 d	79	0-100 d	MAG FAST768: 034	80 µl	neat
8441-14	14	2024-01-24	2024	Winter	1	B	3	3 years	39	>24months	F	02/11/2020	Limousine	Subclinical	42	pos	pos	pos	neg	neg	16S-Mex-	MI	5	19.35	34.48	30.05	0	0	NE	190	346	0	0	NE	2.27875	2.53908	neg	neg	Ext, Robot IDVET	05/04/2024	72	50-100 d	7	0-50 d	79	0-100 d	MAG FAST768: 034	80 µl	neat
8445-14	14	2024-01-24	2024	Winter	1	B	3	3 years	38	>24months	F	14/12/2020	Limousine	Subclinical	42	pos	pos	pos	neg	neg	16S-Mex-	MI	5	18.43	36.87	29.54	37.19	0	NE	non-quantifiable	526	0	0	NE	non-quantifiable	2.7209857441537393	neg	neg	Ext. Robot IDVET	05/04/2024	72	50-100 d	7	0-50 d	79	0-100 d	MAG FAST768: 034	80 µl	neat
2247-12	12	2024-01-31	2024	Winter	1	B	3	3 years	42	>24months	F	24/08/2020	Limousine	Subclinical	42	pos	pos	neg	pos	neg	16S-CMh-	MI	5	19.99	28.46	0	28.03	37.95	NE	2500	0	272	0	NE	3.39794	neg	2.43457	neg	Ext, Robot IDVET	05/04/2024	65	50-100 d	31	0-50 d	96	0-100 d	MAG FAST768: 034	80 µl	neat
2257-12	12	2024-01-31	2024	Winter	1	B	3	3 years	42	>24months	F	28/08/2020	Limousine	Subclinical	42	pos	pos	pos	pos	neg	16S-Mex-CMh-	DI	5	18.53	27.46	31.96	32.59	0	NE	4300	71.7	non-quantifiable	0	NE	3.63347	1.85552	non-quantifiable	neg	Ext, Robot IDVET	05/04/2024	65	50-100 d	31	0-50 d	96	0-100 d	MAG FAST768: 034	80 µl	neat
2287-12	12	2024-01-31	2024	Winter	1	B	3	3 years	40	>24months	F	13/10/2020	Limousine	Subclinical	42	pos	pos	pos	pos	neg	16S-Mex-CMh-	DI	5	19.59	27	31	31.88	35.91	NE	5500	158	14.1	0	NE	3.74036	2.19866	1.14922	neg	Ext, Robot IDVET	05/04/2024	65	50-100 d	31	0-50 d	96	0-100 d	MAG FAST768: 034	80 µl	neat
310-12	12	2024-01-31	2024	Winter	1	B	5	4 -5 years	66	>24months	F	24/08/2018	Limousine	Subclinical	42	pos	pos	neg	pos	neg	16S-CMh-	MI	5	18.57	30.74	0	30.81	0	NE	720	0	32.2	0	NE	2.85733	neg	1.50786	neg	Ext, Robot IDVET	05/04/2024	65	50-100 d	31	0-50 d	96	0-100 d	MAG FAST768: 034	80 µl	neat
3223-12	12	2024-01-31	2024	Winter	1	B	3	3 years	38	>24months	F	09/12/2020	Limousine	Subclinical	42	pos	pos	pos	pos	neg	16S-Mex-CMh-	DI	5	19.11	24	27.76	26.79	0	NE	26000	2280	705	0	NE	4.41497	3.35793	2.84819	neg	Ext, Robot IDVET	05/04/2024	65	50-100 d	31	0-50 d	96	0-100 d	MAG FAST768: 034	80 µl	neat
324-12	12	2024-01-31	2024	Winter	1	B	5	4 -5 years	66	>24months	F	29/08/2018	Limousine	Subclinical	42	pos	pos	neg	pos	neg	16S-CMh-	MI	5	22.88	33.02	0	34.53	0	NE	210	0	non-quantifiable	0	NE	2.32222	neg	non-quantifiable	neg	Ext, Robot IDVET	05/04/2024	65	50-100 d	31	0-50 d	96	0-100 d	MAG FAST768: 034	80 µl	neat
3336-12	12	2024-01-31	2024	Winter	1	B	7	> 5 years	91	>24months	F	21/08/2016	Limousine	Subclinical	42	pos	pos	neg	neg	neg	16S-	unknown	5	18.97	0	0	0	0	NE	NE	0	0	0	NE	NE	neg	neg	neg	Ext. Robot IDVET	05/04/2024	65	50-100 d	31	0-50 d	96	0-100 d	MAG FAST768: 034	80 µl	neat
3784-12	12	2024-01-31	2024	Winter	1	B	9	> 5 years	113	>24months	F	29/10/2014	Limousine	Subclinical	42	pos	pos	pos	pos	neg	16S-Mex-CMh-	DI	5	19.08	26.37	29.89	28.73	36.17	NE	7800	394	159	0	NE	3.89209	2.5955	2.2014	neg	Ext, Robot IDVET	05/04/2024	65	50-100 d	31	0-50 d	96	0-100 d	MAG FAST768: 034	80 µl	neat
4675-12	12	2024-01-31	2024	Winter	1	B	4	4 -5 years	54	>24months	F	24/08/2019	Limousine	Subclinical	42	pos	pos	pos	pos	pos	16S-Mex-CMh-Mass	TI	5	18.63	24.07	30.11	35.56	28.74	NE	27000	329	non-quantifiable	952	NE	4.43136	2.5172	non-quantifiable	2.97864	Ext, Robot IDVET	05/04/2024	65	50-100 d	31	0-50 d	96	0-100 d	MAG FAST768: 034	80 µl	neat
4712-12	12	2024-01-31	2024	Winter	1	B	4	4 -5 years	53	>24months	F	17/09/2019	Limousine	Subclinical	42	pos	pos	pos	neg	pos	16S-Mex-Mass	DI	5	18.75	25.36	29.83	0	30.67	NE	13000	414	0	277	NE	4.11394	2.617	neg	2.44248	Ext, Robot IDVET	05/04/2024	65	50-100 d	31	0-50 d	96	0-100 d	MAG FAST768: 034	80 µl	neat
4716-12	12	2024-01-31	2024	Winter	1	B	4	4 -5 years	53	>24months	F	26/09/2019	Limousine	Subclinical	42	pos	neg	neg	neg	neg	NI	NI	5	19.61	0	0	36.02	0	NE	0	0	0	0	NE	neg	neg	neg	neg	Ext. Robot IDVET	05/04/2024	65	50-100 d	31	0-50 d	96	0-100 d	MAG FAST768: 034	80 µl	neat
5540-12	12	2024-01-31	2024	Winter	1	B	8	> 5 years	99	>24months	F	05/12/2015	Limousine	Subclinical	42	pos	pos	pos	pos	neg	16S-Mex-CMh-	DI	5	19.57	29.4	32.47	34.66	0	NE	1500	47.1	non-quantifiable	0	NE	3.17609	1.67302	non-quantifiable	neg	Ext, Robot IDVET	05/04/2024	65	50-100 d	31	0-50 d	96	0-100 d	MAG FAST768: 034	80 µl	neat
7036-12	12	2024-01-31	2024	Winter	1	B	3	3 years	42	>24months	M	03/09/2020	Limousine	Subclinical	42	pos	pos	pos	pos	neg	16S-Mex-CMh-	DI	5	17.18	28.37	32.31	29.17	0	NE	2600	53.7	113	0	NE	3.41497	1.72997	2.05308	neg	Ext, Robot IDVET	05/04/2024	65	50-100 d	31	0-50 d	96	0-100 d	MAG FAST768: 034	80 µl	neat
7187-12	12	2024-01-31	2024	Winter	1	B	2	2 years	30	>24months	F	29/08/2021	Limousine	Subclinical	42	pos	pos	pos	pos	neg	16S-Mex-CMh-	DI	5	18.91	29.33	30.8	30.21	0	NE	1600	186	51	0	NE	3.20412	2.26951	1.70757	neg	Ext, Robot IDVET	05/04/2024	65	50-100 d	31	0-50 d	96	0-100 d	MAG FAST768: 034	80 µl	neat
7222-12	12	2024-01-31	2024	Winter	1	B	2	2 years	29	>24months	F	09/09/2021	Limousine	Subclinical	42	pos	pos	pos	pos	neg	16S-Mex-CMh-	DI	5	21.28	25.83	30.4	35.35	0	NE	10000	259	non-quantifiable	0	NE	4	2.4133	non-quantifiable	neg	Ext, Robot IDVET	05/04/2024	65	50-100 d	31	0-50 d	96	0-100 d	MAG FAST768: 034	80 µl	neat
7229-12	12	2024-01-31	2024	Winter	1	B	2	2 years	29	>24months	F	13/09/2021	Limousine	Subclinical	42	pos	neg	pos	pos	neg	Mex-CMh-	unknown	5	19.78	29.25	29.25	29.69	0	NE	1600	668	76	0	NE	3.20412	2.82478	1.88081	neg	Ext, Robot IDVET	05/04/2024	65	50-100 d	31	0-50 d	96	0-100 d	MAG FAST768: 034	80 µl	neat
7241-12	12	2024-01-31	2024	Winter	1	B	2	2 years	29	>24months	F	24/09/2021	Limousine	Subclinical	42	pos	pos	pos	pos	neg	16S-Mex-CMh-	DI	5	19.45	25.37	28.35	30.75	0	NE	13000	1400	33.7	0	NE	4.11394	3.14613	1.52763	neg	Ext, Robot IDVET	05/04/2024	65	50-100 d	31	0-50 d	96	0-100 d	MAG FAST768: 034	80 µl	neat
7242-12	12	2024-01-31	2024	Winter	1	B	2	2 years	29	>24months	F	26/09/2021	Limousine	Subclinical	42	pos	pos	pos	pos	pos	16S-Mex-CMh-Mass	TI	5	19	27.38	31.05	29.41	33.3	NE	4500	152	94.3	non-quantifiable	NE	3.65321	2.18184	1.97451	non-quantifiable	Ext, Robot IDVET	05/04/2024	65	50-100 d	31	0-50 d	96	0-100 d	MAG FAST768: 034	80 µl	neat
8749-12	12	2024-01-31	2024	Winter	1	B	4	4 -5 years	46	>24months	M	09/04/2020	Limousine	Subclinical	42	pos	pos	pos	pos	neg	16S-Mex-CMh-	DI	5	19.42	22.8	26.2	31.4	0	NE	54000	8230	20.5	0	NE	4.73239	3.9154	1.31175	neg	Ext, Robot IDVET	05/04/2024	65	50-100 d	31	0-50 d	96	0-100 d	MAG FAST768: 034	80 µl	neat
9557-12	12	2024-01-31	2024	Winter	1	B	8	> 5 years	103	>24months	F	17/08/2015	Limousine	Subclinical	42	pos	neg	neg	neg	neg	NI	NI	5	18.56	0	36.25	0	0	NE	0	0	0	0	NE	neg	neg	neg	neg	Ext. Robot IDVET	05/04/2024	65	50-100 d	31	0-50 d	96	0-100 d	MAG FAST768: 034	80 µl	neat
9577-12	12	2024-01-31	2024	Winter	1	B	8	> 5 years	102	>24months	F	03/09/2015	Limousine	Subclinical	42	pos	pos	pos	neg	neg	16S-Mex-	MI	5	19.34	26.91	33.69	30.06	37.03	NE	5500	17.2	57.2	4.71	NE	3.74036	1.23553	1.7574	0.673021	Ext, Robot IDVET	05/04/2024	65	50-100 d	31	0-50 d	96	0-100 d	MAG FAST768: 034	80 µl	neat
2722-4	4	2023-09-19	2023	Automn	9	D	0	0 -1 year	2	0-6 months	F	19/07/2023	HF	Subclinical	7	pos	neg	neg	neg	neg	NI	NI	5	17.75	0	0	0	0	NE	0	0	0	0	NE	neg	neg	neg	neg	Ext. Robot IDVET	29/09/2023	10	0-50 d	4	0-50 d	14	0-100 d	MAG FAST768: 034	80 µl	neat
4941-4	4	2023-09-19	2023	Automn	9	D	0	0 -1 year	0	0-6 months	F	06/09/2023	HF	Subclinical	7	pos	neg	neg	neg	neg	NI	NI	5	17.39	0	0	0	0	NE	0	0	0	0	NE	neg	neg	neg	neg	Ext. Robot IDVET	29/09/2023	10	0-50 d	4	0-50 d	14	0-100 d	MAG FAST768: 034	80 µl	neat
4942-4	4	2023-09-19	2023	Automn	9	D	0	0 -1 year	0	0-6 months	F	11/09/2023	HF	Subclinical	7	pos	neg	neg	neg	neg	NI	NI	5	15.94	39.61	0	0	0	NE	0	0	0	0	NE	neg	neg	neg	neg	Ext. Robot IDVET	29/09/2023	10	0-50 d	4	0-50 d	14	0-100 d	MAG FAST768: 034	80 µl	neat
4944-4	4	2023-09-19	2023	Automn	9	D	0	0 -1 year	0	0-6 months	F	17/09/2023	HF	Subclinical	7	pos	neg	neg	neg	neg	NI	NI	5	17.23	0	0	0	0	NE	0	0	0	0	NE	neg	neg	neg	neg	Ext. Robot IDVET	29/09/2023	10	0-50 d	4	0-50 d	14	0-100 d	MAG FAST768: 034	80 µl	neat
1079-4	4	2023-09-19	2023	Automn	9	D	3	3 years	36	>24months	F	10/10/2020	HF	Subclinical	7	pos	pos	pos	pos	neg	16S-Mex-CMh-	DI	5	22.57	32.54	31.94	30.22	0	NE	NE	NE	NE	0	NE	NE	NE	NE	neg	Ext. Robot IDVET	13/10/2023	24	0-50 d	3	0-50 d	27	0-100 d	MAG FAST768: 034	80 µl	neat
1084-4	4	2023-09-19	2023	Automn	9	D	3	3 years	35	>24months	F	04/11/2020	HF	Subclinical	7	pos	pos	pos	pos	neg	16S-Mex-CMh-	DI	5	17.25	28.29	27.87	28.75	0	NE	NE	NE	NE	0	NE	NE	NE	NE	neg	Ext. Robot IDVET	13/10/2023	24	0-50 d	3	0-50 d	27	0-100 d	MAG FAST768: 034	80 µl	neat
1087-4	4	2023-09-19	2023	Automn	9	D	3	3 years	35	>24months	F	18/11/2020	HF	Subclinical	7	pos	pos	neg	pos	neg	16S-CMh-	MI	5	18.94	32.85	0	28.99	0	NE	NE	0	NE	0	NE	NE	neg	NE	neg	Ext. Robot IDVET	13/10/2023	24	0-50 d	3	0-50 d	27	0-100 d	MAG FAST768: 034	80 µl	neat
1092-4	4	2023-09-19	2023	Automn	9	D	3	3 years	32	>24months	F	22/01/2021	HF	Subclinical	7	pos	neg	neg	neg	neg	NI	NI	5	19.83	0	0	0	0	NE	0	0	0	0	NE	neg	neg	neg	neg	Ext. Robot IDVET	13/10/2023	24	0-50 d	3	0-50 d	27	0-100 d	MAG FAST768: 034	80 µl	neat
1095-4	4	2023-09-19	2023	Automn	9	D	3	3 years	32	>24months	F	23/01/2021	HF	Subclinical	7	pos	neg	pos	pos	pos	Mex-CMh-Mass	unknown	5	18.37	0	31.79	31.68	31.55	NE	0	NE	NE	NE	NE	neg	NE	NE	NE	Ext. Robot IDVET	13/10/2023	24	0-50 d	3	0-50 d	27	0-100 d	MAG FAST768: 034	80 µl	neat
1099-4	4	2023-09-19	2023	Automn	9	D	3	3 years	31	>24months	F	12/03/2021	HF	Subclinical	7	pos	neg	neg	neg	neg	NI	NI	5	17.8	0	0	0	0	NE	0	0	0	0	NE	neg	neg	neg	neg	Ext. Robot IDVET	13/10/2023	24	0-50 d	3	0-50 d	27	0-100 d	MAG FAST768: 034	80 µl	neat
1103-4	4	2023-09-19	2023	Automn	9	D	2	2 years	30	>24months	F	11/04/2021	HF	Subclinical	7	pos	pos	pos	pos	neg	16S-Mex-CMh-	DI	5	18.7	29.2	27.05	29.42	0	NE	NE	NE	NE	0	NE	NE	NE	NE	neg	Ext. Robot IDVET	13/10/2023	24	0-50 d	3	0-50 d	27	0-100 d	MAG FAST768: 034	80 µl	neat
1107-4	4	2023-09-19	2023	Automn	9	D	2	2 years	29	>24months	F	29/04/2021	HF	Subclinical	7	pos	pos	pos	pos	pos	16S-Mex-CMh-Mass	TI	5	16.79	30.85	31.93	29.96	33.16	NE	NE	NE	NE	NE	NE	NE	NE	NE	NE	Ext. Robot IDVET	13/10/2023	24	0-50 d	3	0-50 d	27	0-100 d	MAG FAST768: 034	80 µl	neat
1112-4	4	2023-09-19	2023	Automn	9	D	2	2 years	28	>24months	F	29/05/2021	HF	Subclinical	7	pos	pos	pos	pos	pos	16S-Mex-CMh-Mass	TI	5	18.26	25.28	28.87	26.26	27.71	NE	NE	NE	NE	NE	NE	NE	NE	NE	NE	Ext. Robot IDVET	13/10/2023	24	0-50 d	3	0-50 d	27	0-100 d	MAG FAST768: 034	80 µl	neat
1113-4	4	2023-09-19	2023	Automn	9	D	2	2 years	28	>24months	F	07/06/2021	HF	Subclinical	7	pos	pos	pos	neg	neg	16S-Mex-	MI	5	16.98	28.78	29.7	0	0	NE	NE	NE	0	0	NE	NE	NE	neg	neg	Ext. Robot IDVET	13/10/2023	24	0-50 d	3	0-50 d	27	0-100 d	MAG FAST768: 034	80 µl	neat
1117-4	4	2023-09-19	2023	Automn	9	D	2	2 years	26	>24months	F	05/08/2021	HF	Subclinical	7	pos	pos	pos	pos	neg	16S-Mex-CMh-	DI	5	16.72	29.33	29.12	30.03	0	NE	NE	NE	NE	0	NE	NE	NE	NE	neg	Ext. Robot IDVET	13/10/2023	24	0-50 d	3	0-50 d	27	0-100 d	MAG FAST768: 034	80 µl	neat
1118-4	4	2023-09-19	2023	Automn	9	D	2	2 years	26	>24months	F	11/08/2021	HF	Subclinical	7	pos	pos	pos	pos	neg	16S-Mex-CMh-	DI	5	17.71	27.63	26.82	29.96	0	NE	NE	NE	NE	0	NE	NE	NE	NE	neg	Ext. Robot IDVET	13/10/2023	24	0-50 d	3	0-50 d	27	0-100 d	MAG FAST768: 034	80 µl	neat
1122-4	4	2023-09-19	2023	Automn	9	D	2	2 years	25	>24months	F	04/09/2021	HF	Subclinical	7	pos	pos	pos	pos	neg	16S-Mex-CMh-	DI	5	17.97	29.96	29.62	28.87	0	NE	NE	NE	NE	0	NE	NE	NE	NE	neg	Ext. Robot IDVET	13/10/2023	24	0-50 d	3	0-50 d	27	0-100 d	MAG FAST768: 034	80 µl	neat
1123-4	4	2023-09-19	2023	Automn	9	D	2	2 years	24	18 months-24 months	F	17/09/2021	HF	Subclinical	7	pos	pos	pos	pos	neg	16S-Mex-CMh-	DI	5	18.43	26.33	27.06	27.65	0	NE	NE	NE	NE	0	NE	NE	NE	NE	neg	Ext. Robot IDVET	13/10/2023	24	0-50 d	3	0-50 d	27	0-100 d	MAG FAST768: 034	80 µl	neat
1124-4	4	2023-09-19	2023	Automn	9	D	3	3 years	32	>24months	F	19/01/2021	HF	Subclinical	7	pos	pos	pos	pos	pos	16S-Mex-CMh-Mass	TI	5	18.66	28.28	29.2	28.82	34	NE	NE	NE	NE	NE	NE	NE	NE	NE	NE	Ext. Robot IDVET	13/10/2023	24	0-50 d	3	0-50 d	27	0-100 d	MAG FAST768: 034	80 µl	neat
2084-4	4	2023-09-19	2023	Automn	9	D	7	> 5 years	88	>24months	F	20/06/2016	HF	Subclinical	7	pos	pos	pos	neg	neg	16S-Mex-	MI	5	18.2	31.19	32.61	0	0	NE	NE	NE	0	0	NE	NE	NE	neg	neg	Ext. Robot IDVET	13/10/2023	24	0-50 d	3	0-50 d	27	0-100 d	MAG FAST768: 034	80 µl	neat
2106-4	4	2023-09-19	2023	Automn	9	D	7	> 5 years	84	>24months	F	23/10/2016	HF	Subclinical	7	pos	pos	pos	pos	neg	16S-Mex-CMh-	DI	5	17.34	31.67	33.99	30.54	0	NE	NE	NE	NE	0	NE	NE	NE	NE	neg	Ext. Robot IDVET	13/10/2023	24	0-50 d	3	0-50 d	27	0-100 d	MAG FAST768: 034	80 µl	neat
2108-4	4	2023-09-19	2023	Automn	9	D	7	> 5 years	84	>24months	F	04/11/2016	HF	Subclinical	7	pos	pos	neg	neg	neg	16S-	unknown	5	17.27	34.96	35.07	0	0	NE	NE	0	0	0	NE	NE	neg	neg	neg	Ext. Robot IDVET	13/10/2023	24	0-50 d	3	0-50 d	27	0-100 d	MAG FAST768: 034	80 µl	neat
2113-4	4	2023-09-19	2023	Automn	9	D	7	> 5 years	83	>24months	F	30/11/2016	HF	Subclinical	7	pos	pos	pos	neg	neg	16S-Mex-	MI	5	20.55	30.62	33.69	34.89	0	NE	NE	NE	0	0	NE	NE	NE	neg	neg	Ext. Robot IDVET	13/10/2023	24	0-50 d	3	0-50 d	27	0-100 d	MAG FAST768: 034	80 µl	neat
2144-4	4	2023-09-19	2023	Automn	9	D	4	4 -5 years	51	>24months	F	21/07/2019	HF	Subclinical	7	pos	pos	pos	pos	neg	16S-Mex-CMh-	DI	5	17.89	29.73	34.08	28.05	0	NE	NE	NE	NE	0	NE	NE	NE	NE	neg	Ext. Robot IDVET	13/10/2023	24	0-50 d	3	0-50 d	27	0-100 d	MAG FAST768: 034	80 µl	neat
2148-4	4	2023-09-19	2023	Automn	9	D	4	4 -5 years	50	>24months	F	21/08/2019	HF	Subclinical	7	pos	neg	neg	neg	neg	NI	NI	5	19.05	0	0	0	0	NE	0	0	0	0	NE	neg	neg	neg	neg	Ext. Robot IDVET	13/10/2023	24	0-50 d	3	0-50 d	27	0-100 d	MAG FAST768: 034	80 µl	neat
2149-4	4	2023-09-19	2023	Automn	9	D	4	4 -5 years	49	>24months	F	04/09/2019	HF	Subclinical	7	pos	pos	pos	pos	neg	16S-Mex-CMh-	DI	5	19.29	29.31	29.6	29.58	0	NE	NE	NE	NE	0	NE	NE	NE	NE	neg	Ext. Robot IDVET	13/10/2023	24	0-50 d	3	0-50 d	27	0-100 d	MAG FAST768: 034	80 µl	neat
2150-4	4	2023-09-19	2023	Automn	9	D	4	4 -5 years	48	>24months	F	20/10/2019	HF	Subclinical	7	pos	pos	pos	neg	neg	16S-Mex-	MI	5	18.89	28.53	28.9	0	0	NE	NE	NE	0	0	NE	NE	NE	neg	neg	Ext. Robot IDVET	13/10/2023	24	0-50 d	3	0-50 d	27	0-100 d	MAG FAST768: 034	80 µl	neat
2684-4	4	2023-09-19	2023	Automn	9	D	1	0 -1 year	11	6-12 months	F	30/10/2022	HF	Subclinical	7	pos	neg	neg	neg	neg	NI	NI	5	19.05	38.58	0	0	0	NE	0	0	0	0	NE	neg	neg	neg	neg	Ext. Robot IDVET	13/10/2023	24	0-50 d	3	0-50 d	27	0-100 d	MAG FAST768: 034	80 µl	neat
2686-4	4	2023-09-19	2023	Automn	9	D	1	0 -1 year	10	6-12 months	F	10/11/2022	HF	Subclinical	7	pos	pos	pos	pos	neg	16S-Mex-CMh-	DI	5	17.96	29.31	30	27.42	0	NE	NE	NE	NE	0	NE	NE	NE	NE	neg	Ext. Robot IDVET	13/10/2023	24	0-50 d	3	0-50 d	27	0-100 d	MAG FAST768: 034	80 µl	neat
2687-4	4	2023-09-19	2023	Automn	9	D	1	0 -1 year	10	6-12 months	F	10/11/2022	HF	Subclinical	7	pos	pos	neg	neg	pos	16S-Mass	MI	5	16.56	33.25	0	0	33.81	NE	NE	0	0	NE	NE	NE	neg	neg	NE	Ext. Robot IDVET	13/10/2023	24	0-50 d	3	0-50 d	27	0-100 d	MAG FAST768: 034	80 µl	neat
2695-4	4	2023-09-19	2023	Automn	9	D	1	0 -1 year	10	6-12 months	F	03/12/2022	HF	Subclinical	7	pos	neg	neg	neg	neg	NI	NI	5	19.32	0	0	0	0	NE	0	0	0	0	NE	neg	neg	neg	neg	Ext. Robot IDVET	13/10/2023	24	0-50 d	3	0-50 d	27	0-100 d	MAG FAST768: 034	80 µl	neat
2696-4	4	2023-09-19	2023	Automn	9	D	1	0 -1 year	9	6-12 months	F	11/12/2022	HF	Subclinical	7	pos	neg	neg	neg	neg	NI	NI	5	18.12	39.68	0	0	0	NE	0	0	0	0	NE	neg	neg	neg	neg	Ext. Robot IDVET	13/10/2023	24	0-50 d	3	0-50 d	27	0-100 d	MAG FAST768: 034	80 µl	neat
2699-4	4	2023-09-19	2023	Automn	9	D	1	0 -1 year	8	6-12 months	F	08/01/2023	HF	Subclinical	7	pos	pos	pos	neg	neg	16S-Mex-	MI	5	19.15	26.33	25.8	0	0	NE	NE	NE	0	0	NE	NE	NE	neg	neg	Ext. Robot IDVET	13/10/2023	24	0-50 d	3	0-50 d	27	0-100 d	MAG FAST768: 034	80 µl	neat
2700-4	4	2023-09-19	2023	Automn	9	D	1	0 -1 year	8	6-12 months	F	14/01/2023	HF	Subclinical	7	pos	pos	pos	neg	neg	16S-Mex-	MI	5	19.61	34.4	32.86	0	0	NE	NE	NE	0	0	NE	NE	NE	neg	neg	Ext. Robot IDVET	13/10/2023	24	0-50 d	3	0-50 d	27	0-100 d	MAG FAST768: 034	80 µl	neat
3617-4	4	2023-09-19	2023	Automn	9	D	9	> 5 years	115	>24months	F	28/03/2014	HF	Subclinical	7	pos	pos	neg	neg	neg	16S-	unknown	5	18.89	34.24	0	0	0	NE	NE	0	0	0	NE	NE	neg	neg	neg	Ext. Robot IDVET	13/10/2023	24	0-50 d	3	0-50 d	27	0-100 d	MAG FAST768: 034	80 µl	neat
3709-4	4	2023-09-19	2023	Automn	9	D	2	2 years	21	18 months-24 months	F	31/12/2021	HF	Subclinical	7	pos	pos	neg	pos	neg	16S-CMh-	MI	5	17.54	33.7	0	31.05	0	NE	NE	0	NE	0	NE	NE	neg	NE	neg	Ext. Robot IDVET	13/10/2023	24	0-50 d	3	0-50 d	27	0-100 d	MAG FAST768: 034	80 µl	neat
3714-4	4	2023-09-19	2023	Automn	9	D	2	2 years	19	18 months-24 months	F	17/02/2022	HF	Subclinical	7	pos	pos	pos	pos	neg	16S-Mex-CMh-	DI	5	17.57	29.36	29.58	28.93	0	NE	NE	NE	NE	0	NE	NE	NE	NE	neg	Ext. Robot IDVET	13/10/2023	24	0-50 d	3	0-50 d	27	0-100 d	MAG FAST768: 034	80 µl	neat
3725-4	4	2023-09-19	2023	Automn	9	D	1	0 -1 year	17	12-18 months	F	10/05/2022	HF	Subclinical	7	pos	pos	pos	pos	neg	16S-Mex-CMh-	DI	5	16.28	24.31	23.77	29.74	0	NE	NE	NE	NE	0	NE	NE	NE	NE	neg	Ext. Robot IDVET	13/10/2023	24	0-50 d	3	0-50 d	27	0-100 d	MAG FAST768: 034	80 µl	neat
3727-4	4	2023-09-19	2023	Automn	9	D	1	0 -1 year	16	12-18 months	F	06/06/2022	HF	Subclinical	7	pos	pos	pos	pos	neg	16S-Mex-CMh-	DI	5	17.9	31.52	29.54	27.05	0	NE	NE	NE	NE	0	NE	NE	NE	NE	neg	Ext. Robot IDVET	13/10/2023	24	0-50 d	3	0-50 d	27	0-100 d	MAG FAST768: 034	80 µl	neat
3728-4	4	2023-09-19	2023	Automn	9	D	1	0 -1 year	15	12-18 months	F	12/06/2022	HF	Subclinical	7	pos	pos	pos	pos	neg	16S-Mex-CMh-	DI	5	18.79	29.03	26.88	27.93	0	NE	NE	NE	NE	0	NE	NE	NE	NE	neg	Ext. Robot IDVET	13/10/2023	24	0-50 d	3	0-50 d	27	0-100 d	MAG FAST768: 034	80 µl	neat
3732-4	4	2023-09-19	2023	Automn	9	D	1	0 -1 year	14	12-18 months	F	24/07/2022	HF	Subclinical	7	pos	pos	pos	pos	neg	16S-Mex-CMh-	DI	5	18.76	34.78	31.46	28.99	0	NE	NE	NE	NE	0	NE	NE	NE	NE	neg	Ext. Robot IDVET	13/10/2023	24	0-50 d	3	0-50 d	27	0-100 d	MAG FAST768: 034	80 µl	neat
3942-4	4	2023-09-19	2023	Automn	9	D	6	> 5 years	77	>24months	F	09/05/2017	HF	Subclinical	7	pos	pos	pos	neg	neg	16S-Mex-	MI	5	17.47	32.39	29.55	0	0	NE	NE	NE	0	0	NE	NE	NE	neg	neg	Ext. Robot IDVET	13/10/2023	24	0-50 d	3	0-50 d	27	0-100 d	MAG FAST768: 034	80 µl	neat
3945-4	4	2023-09-19	2023	Automn	9	D	6	> 5 years	74	>24months	F	07/08/2017	HF	Subclinical	7	pos	neg	neg	neg	neg	NI	NI	5	18.03	43.79	0	37.06	0	NE	0	0	0	0	NE	neg	neg	neg	neg	Ext. Robot IDVET	13/10/2023	24	0-50 d	3	0-50 d	27	0-100 d	MAG FAST768: 034	80 µl	neat
3946-4	4	2023-09-19	2023	Automn	9	D	6	> 5 years	74	>24months	F	07/08/2017	HF	Subclinical	7	pos	pos	neg	pos	neg	16S-CMh-	MI	5	18.66	33.09	0	29.24	0	NE	NE	0	NE	0	NE	NE	neg	NE	neg	Ext. Robot IDVET	13/10/2023	24	0-50 d	3	0-50 d	27	0-100 d	MAG FAST768: 034	80 µl	neat
3955-4	4	2023-09-19	2023	Automn	9	D	6	> 5 years	69	>24months	F	29/01/2018	HF	Subclinical	7	pos	pos	pos	neg	neg	16S-Mex-	MI	5	17.53	32.73	33.56	0	0	NE	NE	NE	0	0	NE	NE	NE	neg	neg	Ext. Robot IDVET	13/10/2023	24	0-50 d	3	0-50 d	27	0-100 d	MAG FAST768: 034	80 µl	neat
5860-4	4	2023-09-19	2023	Automn	9	D	5	4 -5 years	60	>24months	F	01/10/2018	HF	Subclinical	7	pos	pos	pos	neg	neg	16S-Mex-	MI	5	18.49	27.56	29.73	0	0	NE	NE	NE	0	0	NE	NE	NE	neg	neg	Ext. Robot IDVET	13/10/2023	24	0-50 d	3	0-50 d	27	0-100 d	MAG FAST768: 034	80 µl	neat
5862-4	4	2023-09-19	2023	Automn	9	D	5	4 -5 years	60	>24months	F	28/10/2018	HF	Subclinical	7	pos	pos	pos	neg	pos	16S-Mex-Mass	DI	5	18.34	28.67	30.3	0	30.71	NE	NE	NE	0	NE	NE	NE	NE	neg	NE	Ext. Robot IDVET	13/10/2023	24	0-50 d	3	0-50 d	27	0-100 d	MAG FAST768: 034	80 µl	neat
5863-4	4	2023-09-19	2023	Automn	9	D	5	4 -5 years	59	>24months	F	11/11/2018	HF	Subclinical	7	pos	pos	pos	neg	neg	16S-Mex-	MI	5	19.99	33.23	33.14	0	0	NE	NE	NE	0	0	NE	NE	NE	neg	neg	Ext. Robot IDVET	13/10/2023	24	0-50 d	3	0-50 d	27	0-100 d	MAG FAST768: 034	80 µl	neat
5864-4	4	2023-09-19	2023	Automn	9	D	5	4 -5 years	59	>24months	F	27/11/2018	HF	Subclinical	7	pos	pos	pos	neg	pos	16S-Mex-Mass	DI	5	18.37	28.8	32.21	35.97	30.63	NE	NE	NE	0	NE	NE	NE	NE	neg	NE	Ext. Robot IDVET	13/10/2023	24	0-50 d	3	0-50 d	27	0-100 d	MAG FAST768: 034	80 µl	neat
5867-4	4	2023-09-19	2023	Automn	9	D	5	4 -5 years	58	>24months	F	28/12/2018	HF	Subclinical	7	pos	pos	pos	neg	neg	16S-Mex-	MI	5	18.96	28.78	29.39	0	0	NE	NE	NE	0	0	NE	NE	NE	neg	neg	Ext. Robot IDVET	13/10/2023	24	0-50 d	3	0-50 d	27	0-100 d	MAG FAST768: 034	80 µl	neat
5868-4	4	2023-09-19	2023	Automn	9	D	5	4 -5 years	56	>24months	F	29/01/2019	HF	Subclinical	7	pos	pos	neg	neg	neg	16S-	unknown	5	18.27	37.48	0	0	0	NE	NE	0	0	0	NE	NE	neg	neg	neg	Ext. Robot IDVET	13/10/2023	24	0-50 d	3	0-50 d	27	0-100 d	MAG FAST768: 034	80 µl	neat
5869-4	4	2023-09-19	2023	Automn	9	D	5	4 -5 years	56	>24months	F	08/02/2019	HF	Subclinical	7	pos	pos	pos	pos	neg	16S-Mex-CMh-	DI	5	17.35	29.87	31.18	28.34	0	NE	NE	NE	NE	0	NE	NE	NE	NE	neg	Ext. Robot IDVET	13/10/2023	24	0-50 d	3	0-50 d	27	0-100 d	MAG FAST768: 034	80 µl	neat
5870-4	4	2023-09-19	2023	Automn	9	D	5	4 -5 years	56	>24months	F	11/02/2019	HF	Subclinical	7	pos	pos	pos	neg	pos	16S-Mex-Mass	DI	5	17.73	31.24	34.28	0	31.87	NE	NE	NE	0	NE	NE	NE	NE	neg	NE	Ext. Robot IDVET	13/10/2023	24	0-50 d	3	0-50 d	27	0-100 d	MAG FAST768: 034	80 µl	neat
5873-4	4	2023-09-19	2023	Automn	9	D	5	4 -5 years	55	>24months	F	18/03/2019	HF	Subclinical	7	pos	pos	pos	pos	pos	16S-Mex-CMh-Mass	TI	5	16.62	30.17	33.57	30.61	32.53	NE	NE	NE	NE	NE	NE	NE	NE	NE	NE	Ext. Robot IDVET	13/10/2023	24	0-50 d	3	0-50 d	27	0-100 d	MAG FAST768: 034	80 µl	neat
6030-4	4	2023-09-19	2023	Automn	9	D	4	4 -5 years	43	>24months	F	10/03/2020	HF	Subclinical	7	pos	pos	pos	pos	pos	16S-Mex-CMh-Mass	TI	5	19.3	19.3	24.45	30.43	21.91	NE	NE	NE	NE	NE	NE	NE	NE	NE	NE	Ext. Robot IDVET	13/10/2023	24	0-50 d	3	0-50 d	27	0-100 d	MAG FAST768: 034	80 µl	neat
6032-4	4	2023-09-19	2023	Automn	9	D	3	3 years	42	>24months	F	26/03/2020	HF	Subclinical	7	pos	pos	pos	pos	neg	16S-Mex-CMh-	DI	5	17.52	29.04	29	28.3	0	NE	NE	NE	NE	0	NE	NE	NE	NE	neg	Ext. Robot IDVET	13/10/2023	24	0-50 d	3	0-50 d	27	0-100 d	MAG FAST768: 034	80 µl	neat
6034-4	4	2023-09-19	2023	Automn	9	D	3	3 years	40	>24months	F	02/06/2020	HF	Subclinical	7	pos	pos	pos	pos	neg	16S-Mex-CMh-	DI	5	16.77	25.4	26.15	28.26	0	NE	NE	NE	NE	0	NE	NE	NE	NE	neg	Ext. Robot IDVET	13/10/2023	24	0-50 d	3	0-50 d	27	0-100 d	MAG FAST768: 034	80 µl	neat
6043-4	4	2023-09-19	2023	Automn	9	D	3	3 years	38	>24months	F	25/07/2020	HF	Subclinical	7	pos	pos	pos	neg	neg	16S-Mex-	MI	5	17.64	30.85	32.48	0	0	NE	NE	NE	0	0	NE	NE	NE	neg	neg	Ext. Robot IDVET	13/10/2023	24	0-50 d	3	0-50 d	27	0-100 d	MAG FAST768: 034	80 µl	neat
6044-4	4	2023-09-19	2023	Automn	9	D	3	3 years	38	>24months	F	25/07/2020	HF	Subclinical	7	pos	pos	pos	neg	neg	16S-Mex-	MI	5	18.09	31.73	34.06	0	0	NE	NE	NE	0	0	NE	NE	NE	neg	neg	Ext. Robot IDVET	13/10/2023	24	0-50 d	3	0-50 d	27	0-100 d	MAG FAST768: 034	80 µl	neat
6048-4	4	2023-09-19	2023	Automn	9	D	3	3 years	38	>24months	F	29/07/2020	HF	Subclinical	7	pos	pos	neg	pos	neg	16S-CMh-	MI	5	18.69	32.8	37.29	24.85	0	NE	NE	0	NE	0	NE	NE	neg	NE	neg	Ext. Robot IDVET	13/10/2023	24	0-50 d	3	0-50 d	27	0-100 d	MAG FAST768: 034	80 µl	neat
6052-4	4	2023-09-19	2023	Automn	9	D	3	3 years	37	>24months	F	08/09/2020	HF	Subclinical	7	pos	pos	pos	pos	neg	16S-Mex-CMh-	DI	5	17.17	26.98	31.05	26.94	0	NE	NE	NE	NE	0	NE	NE	NE	NE	neg	Ext. Robot IDVET	13/10/2023	24	0-50 d	3	0-50 d	27	0-100 d	MAG FAST768: 034	80 µl	neat
9056-4	4	2023-09-19	2023	Automn	9	D	6	> 5 years	67	>24months	F	14/03/2018	HF	Subclinical	7	pos	pos	pos	neg	neg	16S-Mex-	MI	5	16.76	30.58	32.26	0	0	NE	NE	NE	0	0	NE	NE	NE	neg	neg	Ext. Robot IDVET	13/10/2023	24	0-50 d	3	0-50 d	27	0-100 d	MAG FAST768: 034	80 µl	neat
9059-4	4	2023-09-19	2023	Automn	9	D	5	4 -5 years	67	>24months	F	01/04/2018	HF	Subclinical	7	pos	pos	neg	neg	neg	16S-	unknown	5	17.67	36.19	0	0	0	NE	NE	0	0	0	NE	NE	neg	neg	neg	Ext. Robot IDVET	13/10/2023	24	0-50 d	3	0-50 d	27	0-100 d	MAG FAST768: 034	80 µl	neat
9063-4	4	2023-09-19	2023	Automn	9	D	5	4 -5 years	63	>24months	F	16/07/2018	HF	Subclinical	7	pos	pos	neg	neg	neg	16S-	unknown	5	16.79	32.89	35.5	35.81	0	NE	NE	0	0	0	NE	NE	neg	neg	neg	Ext. Robot IDVET	13/10/2023	24	0-50 d	3	0-50 d	27	0-100 d	MAG FAST768: 034	80 µl	neat
9065-4	4	2023-09-19	2023	Automn	9	D	5	4 -5 years	61	>24months	F	02/09/2018	HF	Subclinical	7	pos	pos	pos	neg	neg	16S-Mex-	MI	5	20.48	31.06	29.34	0	0	NE	NE	NE	0	0	NE	NE	NE	neg	neg	Ext. Robot IDVET	13/10/2023	24	0-50 d	3	0-50 d	27	0-100 d	MAG FAST768: 034	80 µl	neat
9067-4	4	2023-09-19	2023	Automn	9	D	5	4 -5 years	61	>24months	F	16/09/2018	HF	Subclinical	7	pos	pos	pos	neg	neg	16S-Mex-	MI	5	16.85	31.83	33.04	0	0	NE	NE	NE	0	0	NE	NE	NE	neg	neg	Ext. Robot IDVET	13/10/2023	24	0-50 d	3	0-50 d	27	0-100 d	MAG FAST768: 034	80 µl	neat
9554-4	4	2023-09-19	2023	Automn	9	D	9	> 5 years	105	>24months	F	30/01/2015	HF	Subclinical	7	pos	pos	pos	neg	pos	16S-Mex-Mass	DI	5	17.16	26.46	27.57	35.63	31.28	NE	NE	NE	0	NE	NE	NE	NE	neg	NE	Ext. Robot IDVET	13/10/2023	24	0-50 d	3	0-50 d	27	0-100 d	MAG FAST768: 034	80 µl	neat
9559-4	4	2023-09-19	2023	Automn	9	D	9	> 5 years	104	>24months	F	20/03/2015	HF	Subclinical	7	pos	neg	neg	neg	neg	NI	NI	5	23.06	0	0	0	0	NE	0	0	0	0	NE	neg	neg	neg	neg	Ext. Robot IDVET	13/10/2023	24	0-50 d	3	0-50 d	27	0-100 d	MAG FAST768: 034	80 µl	neat
9580-4	4	2023-09-19	2023	Automn	9	D	8	> 5 years	97	>24months	F	20/09/2015	HF	Subclinical	7	pos	pos	neg	pos	neg	16S-CMh-	MI	5	19.16	29.96	36.04	28.69	0	NE	NE	0	NE	0	NE	NE	neg	NE	neg	Ext. Robot IDVET	13/10/2023	24	0-50 d	3	0-50 d	27	0-100 d	MAG FAST768: 034	80 µl	neat
9593-4	4	2023-09-19	2023	Automn	9	D	8	> 5 years	95	>24months	F	24/11/2015	HF	Subclinical	7	pos	pos	pos	neg	neg	16S-Mex-	MI	5	18.08	30.49	31.52	0	0	NE	NE	NE	0	0	NE	NE	NE	neg	neg	Ext. Robot IDVET	13/10/2023	24	0-50 d	3	0-50 d	27	0-100 d	MAG FAST768: 034	80 µl	neat
2708-4	4	2023-09-19	2023	Automn	9	D	0	0 -1 year	5	0-6 months	F	17/04/2023	HF	Subclinical	7	pos	pos	pos	neg	neg	16S-Mex-	MI	5	18.7	32.88	31.48	0	0	NE	NE	NE	0	0	NE	NE	NE	neg	neg	Ext. Robot IDVET	17/10/2023	28	0-50 d	1	0-50 d	29	0-100 d	MAG FAST768: 034	80 µl	neat
2713-4	4	2023-09-19	2023	Automn	9	D	0	0 -1 year	4	0-6 months	F	19/05/2023	HF	Subclinical	7	pos	neg	neg	neg	neg	NI	NI	5	20.45	0	0	0	0	NE	0	0	0	0	NE	neg	neg	neg	neg	Ext. Robot IDVET	17/10/2023	28	0-50 d	1	0-50 d	29	0-100 d	MAG FAST768: 034	80 µl	neat
2720-4	4	2023-09-19	2023	Automn	9	D	0	0 -1 year	2	0-6 months	F	30/07/2023	HF	Subclinical	7	pos	neg	neg	neg	neg	NI	NI	5	18.97	0	0	0	0	NE	0	0	0	0	NE	neg	neg	neg	neg	Ext. Robot IDVET	17/10/2023	28	0-50 d	1	0-50 d	29	0-100 d	MAG FAST768: 034	80 µl	neat
2721-4	4	2023-09-19	2023	Automn	9	D	0	0 -1 year	2	0-6 months	F	07/07/2023	HF	Subclinical	7	pos	pos	neg	neg	neg	16S-	unknown	5	20.54	36.78	0	0	0	NE	NE	0	0	0	NE	NE	neg	neg	neg	Ext. Robot IDVET	17/10/2023	28	0-50 d	1	0-50 d	29	0-100 d	MAG FAST768: 034	80 µl	neat
1304-34	34	2024-02-06	2024	Winter	2	B	4	4 -5 years	53	>24months	F	04/10/2019	Limousine	Subclinical	42	pos	pos	pos	pos	neg	16S-Mex-CMh-	DI	5	18.68	32.78	32.48	28.83	0	NE	306	380	139	0	NE	2.48572	2.57978	2.14301	neg	Ext, Robot IDVET	09/04/2024	63	50-100 d	38	0-50 d	101	100-200 d	MAG FAST768: 034	80 µl	neat
2792-34	34	2024-02-06	2024	Winter	2	B	3	3 years	41	>24months	F	24/09/2020	Limousine	Subclinical	42	pos	pos	pos	pos	neg	16S-Mex-CMh-	DI	5	19.4	31.61	33.39	27.67	0	NE	627	non-quantifiable	343	0	NE	2.79727	non-quantifiable	2.53529	neg	Ext, Robot IDVET	09/04/2024	63	50-100 d	38	0-50 d	101	100-200 d	MAG FAST768: 034	80 µl	neat
2836-34	34	2024-02-06	2024	Winter	2	B	3	3 years	38	>24months	F	09/12/2020	Limousine	Subclinical	42	pos	pos	pos	neg	neg	16S-Mex-	MI	5	18.03	36.25	32.3	36.31	0	NE	36.2	418	0	0	NE	1.55871	2.62118	neg	neg	Ext, Robot IDVET	09/04/2024	63	50-100 d	38	0-50 d	101	100-200 d	MAG FAST768: 034	80 µl	neat
3169-34	34	2024-02-06	2024	Winter	2	B	2	2 years	28	>24months	F	08/10/2021	Limousine	Subclinical	42	pos	pos	pos	pos	neg	16S-Mex-CMh-	DI	5	15.6	28.16	27.76	35.11	0	NE	6200	4540	non-quantifiable	0	NE	3.79239	3.65706	non-quantifiable	neg	Ext, Robot IDVET	09/04/2024	63	50-100 d	38	0-50 d	101	100-200 d	MAG FAST768: 034	80 µl	neat
5157-34	34	2024-02-06	2024	Winter	2	B	10	> 5 years	125	>24months	F	01/11/2013	Limousine	Subclinical	42	pos	neg	pos	neg	neg	Mex-	unknown	5	17.33	38.31	35.76	36.65	0	NE	10.2	non-quantifiable	0	0	NE	1.0086	non-quantifiable	neg	neg	Ext, Robot IDVET	09/04/2024	63	50-100 d	38	0-50 d	101	100-200 d	MAG FAST768: 034	80 µl	neat
1274-24	24	2024-02-08	2024	Winter	2	B	7	> 5 years	87	>24months	F	04/12/2016	Charolaise	Subclinical	42	pos	pos	pos	neg	neg	16S-Mex-	MI	5	19.76	33.46	32.66	0	36.47	NE	2500	213	0	0	NE	3.39794	2.32838	neg	neg	Ext, Robot IDVET	03/05/2024	85	50-100 d	20	0-50 d	105	100-200 d	MAG FAST768: 034	80 µl	neat
1563-24	24	2024-02-08	2024	Winter	2	B	7	> 5 years	85	>24months	F	22/02/2017	Charolaise	Subclinical	42	pos	neg	pos	neg	neg	Mex-	unknown	5	19.85	38.62	35.03	0	0	NE	0	non-quantifiable	0	0	NE	neg	non-quantifiable	neg	neg	Ext. Robot IDVET	03/05/2024	85	50-100 d	28	0-50 d	113	100-200 d	MAG FAST768: 034	80 µl	neat
1566-24	24	2024-02-08	2024	Winter	2	B	6	> 5 years	77	>24months	F	29/09/2017	Charolaise	Subclinical	42	pos	pos	neg	pos	neg	16S-CMh-	MI	5	20.28	35.57	0	31.28	0	NE	non-quantifiable	0	59.9	0	NE	non-quantifiable	neg	1.7774268223893113	neg	Ext. Robot IDVET	03/05/2024	85	50-100 d	28	0-50 d	113	100-200 d	MAG FAST768: 034	80 µl	neat
188-24	24	2024-02-08	2024	Winter	2	B	3	3 years	36	>24months	F	02/03/2021	Charolaise	Subclinical	42	pos	pos	neg	pos	neg	16S-CMh-	MI	5	19.81	36.63	37.71	35.85	0	NE	non-quantifiable	0	non-quantifiable	0	NE	non-quantifiable	neg	non-quantifiable	neg	Ext. Robot IDVET	03/05/2024	85	50-100 d	20	0-50 d	105	100-200 d	MAG FAST768: 034	80 µl	neat
194-24	24	2024-02-08	2024	Winter	2	B	3	3 years	36	>24months	F	26/02/2021	Charolaise	Subclinical	42	pos	pos	pos	pos	neg	16S-Mex-CMh-	DI	5	18.85	33.38	32.58	33.94	0	NE	2700	223	non-quantifiable	0	NE	3.43136	2.3483	non-quantifiable	neg	Ext, Robot IDVET	03/05/2024	85	50-100 d	28	0-50 d	113	100-200 d	MAG FAST768: 034	80 µl	neat
200-24	24	2024-02-08	2024	Winter	2	B	3	3 years	35	>24months	M	02/04/2021	Charolaise	Subclinical	42	pos	pos	neg	pos	neg	16S-CMh-	MI	5	19.24	34.09	0	29.97	0	NE	1700	0	168	0	NE	3.23045	neg	2.22531	neg	Ext, Robot IDVET	03/05/2024	85	50-100 d	20	0-50 d	105	100-200 d	MAG FAST768: 034	80 µl	neat
215-24	24	2024-02-08	2024	Winter	2	B	3	3 years	33	>24months	M	24/05/2021	Charolaise	Subclinical	42	pos	pos	pos	pos	neg	16S-Mex-CMh-	DI	5	20.04	32.78	33.13	29.89	37.84	NE	3900	non-quantifiable	179	0	NE	3.59106	non-quantifiable	2.25285	neg	Ext, Robot IDVET	03/05/2024	85	50-100 d	20	0-50 d	105	100-200 d	MAG FAST768: 034	80 µl	neat
2230-24	24	2024-02-08	2024	Winter	2	B	9	> 5 years	112	>24months	F	20/11/2014	Charolaise	Subclinical	42	pos	neg	neg	neg	neg	NI	NI	5	20.15	0	0	0	0	NE	0	0	0	0	NE	neg	neg	neg	neg	Ext. Robot IDVET	03/05/2024	85	50-100 d	20	0-50 d	105	100-200 d	MAG FAST768: 034	80 µl	neat
2757-24	24	2024-02-08	2024	Winter	2	B	5	4 -5 years	64	>24months	F	23/10/2018	Charolaise	Subclinical	42	pos	pos	pos	pos	neg	16S-Mex-CMh-	DI	5	20.18	36.08	35.78	34.85	0	NE	non-quantifiable	non-quantifiable	non-quantifiable	0	NE	non-quantifiable	non-quantifiable	non-quantifiable	neg	Ext. Robot IDVET	03/05/2024	85	50-100 d	28	0-50 d	113	100-200 d	MAG FAST768: 034	80 µl	neat
2909-24	24	2024-02-08	2024	Winter	2	B	8	> 5 years	96	>24months	F	02/04/2016	Charolaise	Subclinical	42	pos	pos	neg	neg	neg	16S-	unknown	5	19.95	36.96	0	0	0	NE	non-quantifiable	0	0	0	NE	non-quantifiable	neg	neg	neg	Ext. Robot IDVET	03/05/2024	85	50-100 d	28	0-50 d	113	100-200 d	MAG FAST768: 034	80 µl	neat
2911-24	24	2024-02-08	2024	Winter	2	B	8	> 5 years	93	>24months	F	18/06/2016	Charolaise	Subclinical	42	pos	pos	neg	pos	neg	16S-CMh-	MI	5	19.33	36.41	37.54	32.09	0	NE	non-quantifiable	0	non-quantifiable	0	NE	non-quantifiable	neg	non-quantifiable	neg	Ext. Robot IDVET	03/05/2024	85	50-100 d	28	0-50 d	113	100-200 d	MAG FAST768: 034	80 µl	neat
8198-24	24	2024-02-08	2024	Winter	2	B	10	> 5 years	121	>24months	F	04/03/2014	Charolaise	Subclinical	42	pos	pos	pos	neg	neg	16S-Mex-	MI	5	19.15	31.24	31.14	0	0	NE	10000	516	0	0	NE	4	2.71265	neg	neg	Ext, Robot IDVET	03/05/2024	85	50-100 d	20	0-50 d	105	100-200 d	MAG FAST768: 034	80 µl	neat
8485-24	24	2024-02-08	2024	Winter	2	B	4	4 -5 years	48	>24months	F	28/02/2020	Charolaise	Subclinical	42	pos	pos	pos	neg	neg	16S-Mex-	MI	5	19.52	32.85	31.31	0	0	NE	3700	467	0	0	NE	3.5682	2.66932	neg	neg	Ext, Robot IDVET	03/05/2024	85	50-100 d	28	0-50 d	113	100-200 d	MAG FAST768: 034	80 µl	neat
2209-11	11	2024-01-24	2024	Winter	1	B	13	> 5 years	162	>24months	F	30/09/2010	Charolaise	Subclinical	42	pos	pos	pos	pos	neg	16S-Mex-CMh-	DI	5	18.81	30.25	30.54	31.1	0	NE	1000	183	19.2	0	NE	3	2.26245	1.2833	neg	Ext, Robot IDVET	03/04/2024	70	50-100 d	5	0-50 d	75	0-100 d	MAG FAST768: 034	80 µl	neat
2620-11	11	2024-01-24	2024	Winter	1	B	6	> 5 years	78	>24months	F	26/08/2017	Charolaise	Subclinical	42	pos	pos	pos	pos	neg	16S-Mex-CMh-	DI	5	16.73	34.18	32.9	34.3	0	NE	130	28.6	1.77	0	NE	2.11394	1.45637	0.247973	neg	Ext, Robot IDVET	03/04/2024	70	50-100 d	9	0-50 d	79	0-100 d	MAG FAST768: 034	80 µl	neat
3006-11	11	2024-01-24	2024	Winter	1	B	3	3 years	41	>24months	F	31/08/2020	Charolaise	Subclinical	42	pos	pos	pos	pos	pos	16S-Mex-CMh-Mass	TI	5	17.66	28.2	27.71	28.06	34.17	NE	2900	1690	184	non-quantifiable	NE	3.4624	3.22789	2.26482	non-quantifiable	Ext, Robot IDVET	03/04/2024	70	50-100 d	5	0-50 d	75	0-100 d	MAG FAST768: 034	80 µl	neat
3009-11	11	2024-01-24	2024	Winter	1	B	3	3 years	41	>24months	F	09/09/2020	Charolaise	Subclinical	42	pos	pos	pos	pos	neg	16S-Mex-CMh-	DI	5	18.09	30.86	30.7	31.95	0	NE	730	161	10.2	0	NE	2.86332	2.20683	1.0086	neg	Ext, Robot IDVET	03/04/2024	70	50-100 d	5	0-50 d	75	0-100 d	MAG FAST768: 034	80 µl	neat
3016-11	11	2024-01-24	2024	Winter	1	B	3	3 years	41	>24months	F	09/09/2020	Charolaise	Subclinical	42	pos	pos	pos	pos	neg	16S-Mex-CMh-	DI	5	16.31	28.53	28.92	26.15	0	NE	2400	654	765	0	NE	3.38021	2.81558	2.88366	neg	Ext, Robot IDVET	03/04/2024	70	50-100 d	9	0-50 d	79	0-100 d	MAG FAST768: 034	80 µl	neat
3026-11	11	2024-01-24	2024	Winter	1	B	3	3 years	41	>24months	F	20/09/2020	Charolaise	Subclinical	42	pos	pos	pos	pos	pos	16S-Mex-CMh-Mass	TI	5	18.94	26.43	27.8	24.72	31.22	NE	7200	1580	2220	79	NE	3.85733	3.19866	3.34635	1.89763	Ext, Robot IDVET	03/04/2024	70	50-100 d	5	0-50 d	75	0-100 d	MAG FAST768: 034	80 µl	neat
3083-11	11	2024-01-24	2024	Winter	1	B	6	> 5 years	78	>24months	F	10/09/2017	Charolaise	Subclinical	42	pos	pos	neg	neg	neg	16S-	unknown	5	16.54	37.82	0	0	0	NE	non-quantifiable	0	0	0	NE	non-quantifiable	neg	neg	neg	Ext. Robot IDVET	03/04/2024	70	50-100 d	9	0-50 d	79	0-100 d	MAG FAST768: 034	80 µl	neat
3088-11	11	2024-01-24	2024	Winter	1	B	6	> 5 years	77	>24months	F	13/09/2017	Charolaise	Subclinical	42	pos	pos	neg	pos	neg	16S-CMh-	MI	5	16.76	35.49	0	35.55	0	NE	non-quantifiable	0	non-quantifiable	0	NE	non-quantifiable	neg	non-quantifiable	neg	Ext. Robot IDVET	03/04/2024	70	50-100 d	9	0-50 d	79	0-100 d	MAG FAST768: 034	80 µl	neat
3092-11	11	2024-01-24	2024	Winter	1	B	6	> 5 years	77	>24months	F	15/09/2017	Charolaise	Subclinical	42	pos	pos	neg	pos	neg	16S-CMh-	MI	5	15.06	31.6	37.95	29.26	0	NE	500	0	75.5	0	NE	2.69897	neg	1.87795	neg	Ext, Robot IDVET	03/04/2024	70	50-100 d	29	0-50 d	99	0-100 d	MAG FAST768: 034	80 µl	neat
3098-11	11	2024-01-24	2024	Winter	1	B	6	> 5 years	77	>24months	F	19/09/2017	Charolaise	Subclinical	42	pos	pos	neg	pos	neg	16S-CMh-	MI	5	17.94	37.6	0	35.68	0	NE	non-quantifiable	0	non-quantifiable	0	NE	non-quantifiable	neg	non-quantifiable	neg	Ext. Robot IDVET	03/04/2024	70	50-100 d	5	0-50 d	75	0-100 d	MAG FAST768: 034	80 µl	neat
3108-11	11	2024-01-24	2024	Winter	1	B	6	> 5 years	77	>24months	F	01/10/2017	Charolaise	Subclinical	42	pos	pos	pos	neg	neg	16S-Mex-	MI	5	18.2	31.69	31.46	0	37.74	NE	470	88.7	0	0	NE	2.6721	1.94792	neg	neg	Ext, Robot IDVET	03/04/2024	70	50-100 d	5	0-50 d	75	0-100 d	MAG FAST768: 034	80 µl	neat
3161-11	11	2024-01-24	2024	Winter	1	B	5	4 -5 years	66	>24months	F	24/08/2018	Charolaise	Subclinical	42	pos	pos	neg	neg	pos	16S-Mass	MI	5	17.91	28.92	0	0	29.76	NE	2000	0	0	259	NE	3.30103	neg	neg	2.4133	Ext, Robot IDVET	03/04/2024	70	50-100 d	5	0-50 d	75	0-100 d	MAG FAST768: 034	80 µl	neat
3163-11	11	2024-01-24	2024	Winter	1	B	5	4 -5 years	66	>24months	F	24/08/2018	Charolaise	Subclinical	42	pos	pos	pos	neg	neg	16S-Mex-	MI	5	21.22	29.74	28.65	0	0	NE	1300	808	0	0	NE	3.11394	2.90741	neg	neg	Ext, Robot IDVET	03/04/2024	70	50-100 d	5	0-50 d	75	0-100 d	MAG FAST768: 034	80 µl	neat
3169-11	11	2024-01-24	2024	Winter	1	B	4	4 -5 years	54	>24months	F	27/08/2019	Charolaise	Subclinical	42	pos	pos	pos	neg	neg	16S-Mex-	MI	5	18.54	31.98	30.05	0	0	NE	410	269	0	0	NE	2.61278	2.42975	neg	neg	Ext, Robot IDVET	03/04/2024	70	50-100 d	5	0-50 d	75	0-100 d	MAG FAST768: 034	80 µl	neat
3176-11	11	2024-01-24	2024	Winter	1	B	4	4 -5 years	54	>24months	F	30/08/2019	Charolaise	Subclinical	42	pos	pos	pos	pos	neg	16S-Mex-CMh-	DI	5	18.75	33.49	31.83	34.53	0	NE	190	66.3	non-quantifiable	0	NE	2.27875	1.82151	non-quantifiable	neg	Ext, Robot IDVET	03/04/2024	70	50-100 d	5	0-50 d	75	0-100 d	MAG FAST768: 034	80 µl	neat
3178-11	11	2024-01-24	2024	Winter	1	B	4	4 -5 years	54	>24months	F	02/09/2019	Charolaise	Subclinical	42	pos	pos	pos	pos	pos	16S-Mex-CMh-Mass	TI	5	20.02	28.6	28.68	28.56	33.79	NE	2400	789	127	non-quantifiable	NE	3.38021	2.89708	2.1038	non-quantifiable	Ext, Robot IDVET	03/04/2024	70	50-100 d	5	0-50 d	75	0-100 d	MAG FAST768: 034	80 µl	neat
3183-11	11	2024-01-24	2024	Winter	1	B	4	4 -5 years	53	>24months	F	05/09/2019	Charolaise	Subclinical	42	pos	neg	neg	neg	neg	NI	NI	5	19.27	38.06	0	0	0	NE	0	0	0	0	NE	neg	neg	neg	neg	Ext. Robot IDVET	03/04/2024	70	50-100 d	5	0-50 d	75	0-100 d	MAG FAST768: 034	80 µl	neat
3202-11	11	2024-01-24	2024	Winter	1	B	4	4 -5 years	52	>24months	F	18/10/2019	Charolaise	Subclinical	42	pos	pos	pos	pos	neg	16S-Mex-CMh-	DI	5	19.37	28.1	27.31	28.71	0	NE	3000	2320	114	0	NE	3.47712	3.36549	2.0569	neg	Ext, Robot IDVET	03/04/2024	70	50-100 d	5	0-50 d	75	0-100 d	MAG FAST768: 034	80 µl	neat
3212-11	11	2024-01-24	2024	Winter	1	B	4	4 -5 years	52	>24months	F	28/10/2019	Charolaise	Subclinical	42	pos	pos	pos	pos	neg	16S-Mex-CMh-	DI	5	18.23	28.33	28.5	26.6	0	NE	2700	909	547	0	NE	3.43136	2.95856	2.73799	neg	Ext, Robot IDVET	03/04/2024	70	50-100 d	5	0-50 d	75	0-100 d	MAG FAST768: 034	80 µl	neat
6198-11	11	2024-01-24	2024	Winter	1	B	13	> 5 years	157	>24months	F	15/03/2011	Charolaise	Subclinical	42	pos	pos	neg	pos	neg	16S-CMh-	MI	5	18.24	37.37	0	35.84	0	NE	non-quantifiable	0	non-quantifiable	0	NE	non-quantifiable	neg	non-quantifiable	neg	Ext. Robot IDVET	03/04/2024	70	50-100 d	9	0-50 d	79	0-100 d	MAG FAST768: 034	80 µl	neat
6493-11	11	2024-01-24	2024	Winter	1	B	8	> 5 years	91	>24months	F	23/07/2016	Charolaise	Subclinical	42	pos	pos	neg	neg	neg	16S-	unknown	5	18.62	37.54	0	37.01	0	NE	non-quantifiable	0	0	0	NE	non-quantifiable	neg	neg	neg	Ext. Robot IDVET	03/04/2024	70	50-100 d	5	0-50 d	75	0-100 d	MAG FAST768: 034	80 µl	neat
7694-11	11	2024-01-24	2024	Winter	1	B	9	> 5 years	111	>24months	F	01/12/2014	Charolaise	Subclinical	42	pos	pos	pos	neg	neg	16S-Mex-	MI	5	18.4	32.66	32.98	0	36.2	NE	290	26.9	0	0	NE	2.4624	1.42975	neg	neg	Ext, Robot IDVET	03/04/2024	70	50-100 d	5	0-50 d	75	0-100 d	MAG FAST768: 034	80 µl	neat
2551-17	17	2024-01-29	2024	Winter	1	B	11	> 5 years	132	>24months	F	02/04/2013	Limousine	Subclinical	42	pos	pos	pos	pos	neg	16S-Mex-CMh-	DI	5	18.25	32.61	32.78	30.42	0	NE	120	36.5	43.4	0	NE	2.07918	1.56229	1.63749	neg	Ext, Robot IDVET	05/04/2024	67	50-100 d	27	0-50 d	94	0-100 d	MAG FAST768: 034	80 µl	neat
285-17	17	2024-01-29	2024	Winter	1	B	5	4 -5 years	67	>24months	F	09/08/2018	Limousine	Subclinical	42	pos	pos	pos	neg	pos	16S-Mex-Mass	DI	5	18.85	32.33	34.23	37.6	31.68	NE	140	non-quantifiable	0	145	NE	2.14613	non-quantifiable	neg	2.16137	Ext, Robot IDVET	05/04/2024	67	50-100 d	27	0-50 d	94	0-100 d	MAG FAST768: 034	80 µl	neat
316-17	17	2024-01-29	2024	Winter	1	B	5	4 -5 years	60	>24months	F	14/02/2019	Limousine	Subclinical	42	pos	pos	pos	neg	neg	16S-Mex-	MI	5	18.44	32.23	30.16	36.27	0	NE	150	316	0	0	NE	2.17609	2.49969	neg	neg	Ext, Robot IDVET	05/04/2024	67	50-100 d	27	0-50 d	94	0-100 d	MAG FAST768: 034	80 µl	neat
4229-17	17	2024-01-29	2024	Winter	1	B	12	> 5 years	142	>24months	F	23/05/2012	Limousine	Subclinical	42	pos	pos	pos	pos	neg	16S-Mex-CMh-	DI	5	18.67	31.1	29.65	35.83	0	NE	280	480	non-quantifiable	0	NE	2.44716	2.68124	non-quantifiable	neg	Ext, Robot IDVET	05/04/2024	67	50-100 d	27	0-50 d	94	0-100 d	MAG FAST768: 034	80 µl	neat
4231-17	17	2024-01-29	2024	Winter	1	B	12	> 5 years	142	>24months	F	08/06/2012	Limousine	Subclinical	42	pos	pos	neg	neg	neg	16S-	unknown	5	17.87	37.17	0	0	0	NE	non-quantifiable	0	0	0	NE	non-quantifiable	neg	neg	neg	Ext. Robot IDVET	05/04/2024	67	50-100 d	27	0-50 d	94	0-100 d	MAG FAST768: 034	80 µl	neat
4600-17	17	2024-01-29	2024	Winter	1	B	8	> 5 years	96	>24months	F	13/03/2016	Limousine	Subclinical	42	pos	pos	pos	pos	neg	16S-Mex-CMh-	DI	5	19.02	28.73	28.08	35.93	0	NE	1000	1750	non-quantifiable	0	NE	3	3.24304	non-quantifiable	neg	Ext, Robot IDVET	05/04/2024	67	50-100 d	27	0-50 d	94	0-100 d	MAG FAST768: 034	80 µl	neat
6121-17	17	2024-01-29	2024	Winter	1	B	9	> 5 years	107	>24months	F	26/04/2015	Limousine	Subclinical	42	pos	neg	neg	neg	neg	NI	NI	5	18.37	41.04	0	0	0	NE	0	0	0	0	NE	neg	neg	neg	neg	Ext. Robot IDVET	05/04/2024	67	50-100 d	27	0-50 d	94	0-100 d	MAG FAST768: 034	80 µl	neat
6964-17	17	2024-01-29	2024	Winter	1	B	2	2 years	26	>24months	F	03/12/2021	Limousine	Subclinical	42	pos	pos	pos	pos	neg	16S-Mex-CMh-	DI	5	17.53	27.34	28.64	25.2	0	NE	2200	1100	2390	0	NE	3.34242	3.04139	3.3784	neg	Ext, Robot IDVET	05/04/2024	67	50-100 d	27	0-50 d	94	0-100 d	MAG FAST768: 034	80 µl	neat
6965-17	17	2024-01-29	2024	Winter	1	B	2	2 years	26	>24months	M	08/12/2021	Limousine	Subclinical	42	pos	pos	pos	pos	neg	16S-Mex-CMh-	DI	5	19.05	24.12	27.19	28.23	0	NE	26000	3640	233	0	NE	4.41497	3.5611	2.36736	neg	Ext, Robot IDVET	05/04/2024	67	50-100 d	31	0-50 d	98	0-100 d	MAG FAST768: 034	80 µl	neat
6969-17	17	2024-01-29	2024	Winter	1	B	2	2 years	25	>24months	F	05/01/2022	Limousine	Subclinical	42	pos	pos	pos	pos	neg	16S-Mex-CMh-	DI	5	16.91	30.54	33.53	28.27	0	NE	380	non-quantifiable	226	0	NE	2.57978	non-quantifiable	2.35411	neg	Ext, Robot IDVET	05/04/2024	67	50-100 d	27	0-50 d	94	0-100 d	MAG FAST768: 034	80 µl	neat
7217-17	17	2024-01-29	2024	Winter	1	B	10	> 5 years	122	>24months	F	22/01/2014	Limousine	Subclinical	42	pos	pos	neg	pos	neg	16S-CMh-	MI	5	17.12	35.25	36.33	31.92	0	NE	non-quantifiable	0	13.7	0	NE	non-quantifiable	neg	1.1367205671564067	neg	Ext. Robot IDVET	05/04/2024	67	50-100 d	27	0-50 d	94	0-100 d	MAG FAST768: 034	80 µl	neat
7292-17	17	2024-01-29	2024	Winter	1	B	9	> 5 years	108	>24months	F	31/03/2015	Limousine	Subclinical	42	pos	neg	neg	neg	neg	NI	NI	5	18.62	0	0	0	0	NE	0	0	0	0	NE	neg	neg	neg	neg	Ext. Robot IDVET	05/04/2024	67	50-100 d	27	0-50 d	94	0-100 d	MAG FAST768: 034	80 µl	neat
9202-17	17	2024-01-29	2024	Winter	1	B	4	4 -5 years	50	>24months	F	19/12/2019	Limousine	Subclinical	42	pos	pos	pos	pos	neg	16S-Mex-CMh-	DI	5	17.39	32.78	33.17	29.5	0	NE	110	non-quantifiable	88	0	NE	2.04139	non-quantifiable	1.94448	neg	Ext, Robot IDVET	05/04/2024	67	50-100 d	27	0-50 d	94	0-100 d	MAG FAST768: 034	80 µl	neat
9204-17	17	2024-01-29	2024	Winter	1	B	4	4 -5 years	50	>24months	F	05/01/2020	Limousine	Subclinical	42	pos	pos	neg	pos	neg	16S-CMh-	MI	5	19.16	29.99	0	27.29	36.16	NE	510	0	480	0	NE	2.70757	neg	2.68124	neg	Ext, Robot IDVET	05/04/2024	67	50-100 d	27	0-50 d	94	0-100 d	MAG FAST768: 034	80 µl	neat
9270-17	17	2024-01-29	2024	Winter	1	B	3	3 years	38	>24months	F	22/12/2020	Limousine	Subclinical	42	pos	pos	pos	neg	neg	16S-Mex-	MI	5	19.08	32.84	32.05	0	37.75	NE	110	66.6	0	0	NE	2.04139	1.82347	neg	neg	Ext, Robot IDVET	05/04/2024	67	50-100 d	27	0-50 d	94	0-100 d	MAG FAST768: 034	80 µl	neat
9272-17	17	2024-01-29	2024	Winter	1	B	3	3 years	37	>24months	F	24/01/2021	Limousine	Subclinical	42	pos	pos	pos	pos	pos	16S-Mex-CMh-Mass	TI	5	17.42	28.01	27.76	26.68	32.93	NE	1500	2280	767	65.1	NE	3.17609	3.35793	2.8848	1.81358	Ext, Robot IDVET	05/04/2024	67	50-100 d	27	0-50 d	94	0-100 d	MAG FAST768: 034	80 µl	neat
9611-17	17	2024-01-29	2024	Winter	1	B	4	4 -5 years	48	>24months	F	20/02/2020	Limousine	Subclinical	42	pos	pos	neg	pos	neg	16S-CMh-	MI	5	18.39	33.56	0	30.32	0	NE	72	0	46.9	0	NE	1.85733	neg	1.67117	neg	Ext, Robot IDVET	05/04/2024	67	50-100 d	27	0-50 d	94	0-100 d	MAG FAST768: 034	80 µl	neat
[truncated: 126 more columns]
